# Supplementary material
Source: publisher figshare collection journal article supplement (https://acs.figshare.com/ndownloader/files/8680771)
Supplement: Supplementary file 1 [file 8680771]

 
data_16kaw8h
 
_audit_creation_method            'SHELXL-2014/7'
_shelx_SHELXL_version_number      '2014/7'
_chemical_name_systematic         ?
_chemical_name_common             ?
_chemical_melting_point           ?
_chemical_formula_moiety          ?
_chemical_formula_sum
 'C26 H47 B O Si' 
_chemical_formula_weight          414.53

loop_
 _atom_type_symbol
 _atom_type_description
 _atom_type_scat_dispersion_real
 _atom_type_scat_dispersion_imag
 _atom_type_scat_source
 'C'  'C'   0.0033   0.0016
 'International Tables Vol C Tables 4.2.6.8 and 6.1.1.4'
 'H'  'H'   0.0000   0.0000
 'International Tables Vol C Tables 4.2.6.8 and 6.1.1.4'
 'B'  'B'   0.0013   0.0007
 'International Tables Vol C Tables 4.2.6.8 and 6.1.1.4'
 'O'  'O'   0.0106   0.0060
 'International Tables Vol C Tables 4.2.6.8 and 6.1.1.4'
 'Si'  'Si'   0.0817   0.0704
 'International Tables Vol C Tables 4.2.6.8 and 6.1.1.4'
 
_space_group_crystal_system       monoclinic
_space_group_IT_number            14
_space_group_name_H-M_alt         'P 21/c'
_space_group_name_Hall            '-P 2ybc'
 
_shelx_space_group_comment
;
The symmetry employed for this shelxl refinement is uniquely defined
by the following loop, which should always be used as a source of
symmetry information in preference to the above space-group names.
They are only intended as comments.
;
 
loop_
 _space_group_symop_operation_xyz
 'x, y, z'
 '-x, y+1/2, -z+1/2'
 '-x, -y, -z'
 'x, -y-1/2, z-1/2'
 
_cell_length_a                    10.3814(4)
_cell_length_b                    8.5313(3)
_cell_length_c                    30.7969(11)
_cell_angle_alpha                 90
_cell_angle_beta                  99.6603(5)
_cell_angle_gamma                 90
_cell_volume                      2688.91(17)
_cell_formula_units_Z             4
_cell_measurement_temperature     200(2)
_cell_measurement_reflns_used      9991
_cell_measurement_theta_min        2.21
_cell_measurement_theta_max       28.11

_exptl_crystal_description       'block'
_exptl_crystal_colour            'colourless'
_exptl_crystal_density_meas       ?
_exptl_crystal_density_method     ?
_exptl_crystal_density_diffrn     1.024          
_exptl_crystal_F_000              920
_exptl_transmission_factor_min    ?
_exptl_transmission_factor_max    ?
_exptl_crystal_size_max           0.460
_exptl_crystal_size_mid           0.340
_exptl_crystal_size_min           0.190
_exptl_absorpt_coefficient_mu     0.101
_shelx_estimated_absorpt_T_min    0.955
_shelx_estimated_absorpt_T_max    0.981
_exptl_absorpt_correction_type    multi-scan
_exptl_absorpt_correction_T_min   0.7107
_exptl_absorpt_correction_T_max   0.7457
_exptl_absorpt_process_details    SADABS
_exptl_absorpt_special_details    ?
_diffrn_ambient_temperature       200(2)
_diffrn_radiation_wavelength      0.71073
_diffrn_radiation_type            MoK\a
_diffrn_radiation_source         'sealed tube'
_diffrn_radiation_monochromator   graphite
_diffrn_measurement_device_type  'Bruker APEX-II CCD'
_diffrn_measurement_method       '\w scans'
_diffrn_detector_area_resol_mean  ?
_diffrn_reflns_number             40783
_diffrn_reflns_av_unetI/netI      0.0166
_diffrn_reflns_av_R_equivalents   0.0234
_diffrn_reflns_limit_h_min        -13
_diffrn_reflns_limit_h_max        13
_diffrn_reflns_limit_k_min        -11
_diffrn_reflns_limit_k_max        11
_diffrn_reflns_limit_l_min        -41
_diffrn_reflns_limit_l_max        41
_diffrn_reflns_theta_min          1.341
_diffrn_reflns_theta_max          28.285
_diffrn_reflns_theta_full         25.242
_diffrn_measured_fraction_theta_max   1.000
_diffrn_measured_fraction_theta_full  1.000
_diffrn_reflns_Laue_measured_fraction_max    1.000
_diffrn_reflns_Laue_measured_fraction_full   1.000
_diffrn_reflns_point_group_measured_fraction_max   1.000
_diffrn_reflns_point_group_measured_fraction_full  1.000
_reflns_number_total              6670
_reflns_number_gt                 5673
_reflns_threshold_expression      'I > 2\s(I)'
_reflns_Friedel_coverage          0.000
_reflns_Friedel_fraction_max      .
_reflns_Friedel_fraction_full     .
 
_reflns_special_details
;
 Reflections were merged by SHELXL according to the crystal
 class for the calculation of statistics and refinement.
 
 _reflns_Friedel_fraction is defined as the number of unique
 Friedel pairs measured divided by the number that would be
 possible theoretically, ignoring centric projections and
 systematic absences.
;
 
_computing_data_collection       'Bruker APEX2'
_computing_cell_refinement       'Bruker SAINT'
_computing_data_reduction        'Bruker SAINT'
_computing_structure_solution    'SHELXT (Sheldrick 2014)'
_computing_structure_refinement  'SHELXL-2014/7 (Sheldrick, 2014)'
_computing_molecular_graphics     ?
_computing_publication_material   ?
_refine_special_details           ?
_refine_ls_structure_factor_coef  Fsqd
_refine_ls_matrix_type            full
_refine_ls_weighting_scheme       calc
_refine_ls_weighting_details
'w=1/[\s^2^(Fo^2^)+(0.0715P)^2^+0.5152P] where P=(Fo^2^+2Fc^2^)/3'
_atom_sites_solution_primary      ?
_atom_sites_solution_secondary    ?
_atom_sites_solution_hydrogens    geom
_refine_ls_hydrogen_treatment     constr
_refine_ls_extinction_method      none
_refine_ls_extinction_coef        .
_refine_ls_number_reflns          6670
_refine_ls_number_parameters      297
_refine_ls_number_restraints      5
_refine_ls_R_factor_all           0.0508
_refine_ls_R_factor_gt            0.0434
_refine_ls_wR_factor_ref          0.1292
_refine_ls_wR_factor_gt           0.1230
_refine_ls_goodness_of_fit_ref    1.067
_refine_ls_restrained_S_all       1.068
_refine_ls_shift/su_max           0.000
_refine_ls_shift/su_mean          0.000
 
loop_
 _atom_site_label
 _atom_site_type_symbol
 _atom_site_fract_x
 _atom_site_fract_y
 _atom_site_fract_z
 _atom_site_U_iso_or_equiv
 _atom_site_adp_type
 _atom_site_occupancy
 _atom_site_site_symmetry_order  
 _atom_site_calc_flag
 _atom_site_refinement_flags_posn
 _atom_site_refinement_flags_adp
 _atom_site_refinement_flags_occupancy
 _atom_site_disorder_assembly
 _atom_site_disorder_group
Si1 Si 0.27820(3) 0.47524(4) 0.35160(2) 0.02933(10) Uani 1 1 d . . . . .
O1 O 0.27679(7) 0.61848(10) 0.38733(3) 0.03248(18) Uani 1 1 d . . . . .
B1 B 0.68772(14) 0.81317(18) 0.38028(5) 0.0404(3) Uani 1 1 d . . . . .
C1 C 0.37596(10) 0.64940(13) 0.42449(4) 0.0294(2) Uani 1 1 d . . . . .
H1 H 0.4193 0.5482 0.4348 0.035 Uiso 1 1 calc R U . . .
C2 C 0.48004(11) 0.76185(14) 0.41189(4) 0.0334(2) Uani 1 1 d . . . . .
H2 H 0.4340 0.8482 0.3935 0.040 Uiso 1 1 calc R U . . .
C3 C 0.57890(11) 0.68421(14) 0.38550(4) 0.0329(2) Uani 1 1 d . . . . .
H3 H 0.6235 0.5974 0.4040 0.039 Uiso 1 1 calc R U . . .
C4 C 0.52728(11) 0.61509(15) 0.33908(4) 0.0350(3) Uani 1 1 d . . . . .
H4 H 0.4690 0.6950 0.3220 0.042 Uiso 1 1 calc R U . . .
C5 C 0.44876(11) 0.46136(14) 0.33950(4) 0.0348(2) Uani 1 1 d . . . . .
H5A H 0.4989 0.3905 0.3616 0.042 Uiso 1 1 calc R U . . .
H5B H 0.4444 0.4107 0.3104 0.042 Uiso 1 1 calc R U . . .
C6 C 0.30626(11) 0.71231(13) 0.46038(4) 0.0302(2) Uani 1 1 d . . . . .
C7 C 0.21273(12) 0.82931(15) 0.45093(4) 0.0364(3) Uani 1 1 d . . . . .
H7 H 0.1920 0.8693 0.4218 0.044 Uiso 1 1 calc R U . . .
C8 C 0.14936(13) 0.88820(17) 0.48356(5) 0.0452(3) Uani 1 1 d . . . . .
H8 H 0.0866 0.9694 0.4768 0.054 Uiso 1 1 calc R U . . .
C9 C 0.17725(14) 0.82915(18) 0.52593(5) 0.0463(3) Uani 1 1 d . . . . .
H9 H 0.1324 0.8682 0.5481 0.056 Uiso 1 1 calc R U . . .
C10 C 0.27001(17) 0.71383(18) 0.53580(5) 0.0517(4) Uani 1 1 d . . . . .
H10 H 0.2906 0.6744 0.5650 0.062 Uiso 1 1 calc R U . . .
C11 C 0.33370(15) 0.65497(17) 0.50300(4) 0.0451(3) Uani 1 1 d . . . . .
H11 H 0.3969 0.5743 0.5099 0.054 Uiso 1 1 calc R U . . .
C12 C 0.55846(14) 0.8347(2) 0.45390(5) 0.0527(4) Uani 1 1 d . . . . .
H12A H 0.6235 0.9076 0.4458 0.079 Uiso 1 1 calc R U . . .
H12B H 0.6028 0.7515 0.4727 0.079 Uiso 1 1 calc R U . . .
H12C H 0.4990 0.8913 0.4699 0.079 Uiso 1 1 calc R U . . .
C13 C 0.64413(14) 0.5864(2) 0.31493(5) 0.0508(4) Uani 1 1 d . . . . .
H13A H 0.7008 0.6804 0.3185 0.061 Uiso 1 1 calc R U . . .
H13B H 0.6960 0.4977 0.3294 0.061 Uiso 1 1 calc R U . . .
C14 C 0.6078(2) 0.5507(3) 0.26600(6) 0.0716(5) Uani 1 1 d . . . . .
H14A H 0.5519 0.6346 0.2515 0.107 Uiso 1 1 calc R U . . .
H14B H 0.5606 0.4508 0.2620 0.107 Uiso 1 1 calc R U . . .
H14C H 0.6873 0.5437 0.2529 0.107 Uiso 1 1 calc R U . . .
C15 C 0.83610(13) 0.79206(18) 0.40019(6) 0.0531(4) Uani 1 1 d . . . . .
H15A H 0.8866 0.8040 0.3758 0.064 Uiso 1 1 calc R U . . .
H15B H 0.8614 0.8799 0.4209 0.064 Uiso 1 1 calc R U . . .
C16 C 0.88050(15) 0.6414(2) 0.42423(8) 0.0726(5) Uani 1 1 d . . . . .
H16A H 0.8540 0.5518 0.4049 0.109 Uiso 1 1 calc R U . . .
H16B H 0.8404 0.6328 0.4507 0.109 Uiso 1 1 calc R U . . .
H16C H 0.9758 0.6422 0.4326 0.109 Uiso 1 1 calc R U . . .
C17 C 0.64182(16) 0.96912(19) 0.35501(7) 0.0594(4) Uani 1 1 d . . . . .
H17A H 0.5841 0.9390 0.3273 0.071 Uiso 1 1 calc R U . . .
H17B H 0.5869 1.0265 0.3731 0.071 Uiso 1 1 calc R U . . .
C18 C 0.7405(2) 1.0841(2) 0.34299(6) 0.0699(5) Uani 1 1 d . . . . .
H18A H 0.7948 1.0322 0.3241 0.105 Uiso 1 1 calc R U . . .
H18B H 0.7960 1.1218 0.3699 0.105 Uiso 1 1 calc R U . . .
H18C H 0.6947 1.1730 0.3272 0.105 Uiso 1 1 calc R U . . .
C19 C 0.15740(12) 0.54651(17) 0.30211(4) 0.0399(3) Uani 1 1 d D . . . .
C23 C 0.23428(12) 0.27930(15) 0.37553(4) 0.0385(3) Uani 1 1 d D . . . .
C20 C 0.2159(2) 0.6876(2) 0.28067(7) 0.0473(5) Uani 0.884(3) 1 d . . P A 1
H20A H 0.2930 0.6533 0.2687 0.071 Uiso 0.884(3) 1 calc R U P A 1
H20B H 0.2413 0.7691 0.3029 0.071 Uiso 0.884(3) 1 calc R U P A 1
H20C H 0.1506 0.7297 0.2568 0.071 Uiso 0.884(3) 1 calc R U P A 1
C21 C 0.1230(2) 0.4210(3) 0.26665(6) 0.0595(5) Uani 0.884(3) 1 d . . P A 1
H21A H 0.0673 0.4668 0.2409 0.089 Uiso 0.884(3) 1 calc R U P A 1
H21B H 0.0763 0.3350 0.2783 0.089 Uiso 0.884(3) 1 calc R U P A 1
H21C H 0.2034 0.3807 0.2580 0.089 Uiso 0.884(3) 1 calc R U P A 1
C22 C 0.03097(18) 0.6074(3) 0.31696(7) 0.0613(6) Uani 0.884(3) 1 d . . P A 1
H22A H -0.0282 0.6494 0.2915 0.092 Uiso 0.884(3) 1 calc R U P A 1
H22B H 0.0532 0.6904 0.3390 0.092 Uiso 0.884(3) 1 calc R U P A 1
H22C H -0.0121 0.5210 0.3299 0.092 Uiso 0.884(3) 1 calc R U P A 1
C24 C 0.2624(2) 0.1431(2) 0.34530(6) 0.0510(5) Uani 0.884(3) 1 d . . P A 1
H24A H 0.2054 0.1526 0.3166 0.077 Uiso 0.884(3) 1 calc R U P A 1
H24B H 0.2456 0.0429 0.3589 0.077 Uiso 0.884(3) 1 calc R U P A 1
H24C H 0.3539 0.1475 0.3412 0.077 Uiso 0.884(3) 1 calc R U P A 1
C25 C 0.09028(19) 0.2695(2) 0.38101(8) 0.0575(5) Uani 0.884(3) 1 d . . P A 1
H25A H 0.0345 0.2795 0.3521 0.086 Uiso 0.884(3) 1 calc R U P A 1
H25B H 0.0705 0.3544 0.4003 0.086 Uiso 0.884(3) 1 calc R U P A 1
H25C H 0.0739 0.1682 0.3941 0.086 Uiso 0.884(3) 1 calc R U P A 1
C26 C 0.3198(2) 0.2547(3) 0.42067(6) 0.0563(6) Uani 0.884(3) 1 d . . P A 1
H26A H 0.3039 0.1499 0.4317 0.084 Uiso 0.884(3) 1 calc R U P A 1
H26B H 0.2980 0.3338 0.4413 0.084 Uiso 0.884(3) 1 calc R U P A 1
H26C H 0.4120 0.2647 0.4178 0.084 Uiso 0.884(3) 1 calc R U P A 1
C20' C 0.1946(19) 0.7133(13) 0.2920(6) 0.0473(5) Uani 0.116(3) 1 d D . P A 2
H20D H 0.1447 0.7458 0.2636 0.071 Uiso 0.116(3) 1 calc R U P A 2
H20E H 0.2882 0.7179 0.2908 0.071 Uiso 0.116(3) 1 calc R U P A 2
H20F H 0.1749 0.7837 0.3152 0.071 Uiso 0.116(3) 1 calc R U P A 2
C21' C 0.1762(18) 0.437(2) 0.2629(5) 0.0595(5) Uani 0.116(3) 1 d D . P A 2
H21D H 0.1057 0.4560 0.2380 0.089 Uiso 0.116(3) 1 calc R U P A 2
H21E H 0.1742 0.3275 0.2721 0.089 Uiso 0.116(3) 1 calc R U P A 2
H21F H 0.2605 0.4599 0.2539 0.089 Uiso 0.116(3) 1 calc R U P A 2
C22' C 0.0162(15) 0.515(3) 0.3085(6) 0.0613(6) Uani 0.116(3) 1 d . . P A 2
H22D H -0.0443 0.5595 0.2838 0.092 Uiso 0.116(3) 1 calc R U P A 2
H22E H 0.0009 0.5627 0.3361 0.092 Uiso 0.116(3) 1 calc R U P A 2
H22F H 0.0019 0.4012 0.3097 0.092 Uiso 0.116(3) 1 calc R U P A 2
C24' C 0.1914(18) 0.1421(14) 0.3448(5) 0.0510(5) Uani 0.116(3) 1 d D . P A 2
H24D H 0.2506 0.1325 0.3233 0.077 Uiso 0.116(3) 1 calc R U P A 2
H24E H 0.1022 0.1603 0.3294 0.077 Uiso 0.116(3) 1 calc R U P A 2
H24F H 0.1940 0.0452 0.3621 0.077 Uiso 0.116(3) 1 calc R U P A 2
C25' C 0.1257(14) 0.3022(19) 0.4049(6) 0.0575(5) Uani 0.116(3) 1 d D . P A 2
H25D H 0.0492 0.3527 0.3874 0.086 Uiso 0.116(3) 1 calc R U P A 2
H25E H 0.1596 0.3684 0.4302 0.086 Uiso 0.116(3) 1 calc R U P A 2
H25F H 0.1004 0.1999 0.4152 0.086 Uiso 0.116(3) 1 calc R U P A 2
C26' C 0.3494(17) 0.223(3) 0.4110(6) 0.0563(6) Uani 0.116(3) 1 d D . P A 2
H26D H 0.4256 0.2007 0.3970 0.084 Uiso 0.116(3) 1 calc R U P A 2
H26E H 0.3237 0.1273 0.4250 0.084 Uiso 0.116(3) 1 calc R U P A 2
H26F H 0.3715 0.3047 0.4333 0.084 Uiso 0.116(3) 1 calc R U P A 2
 
loop_
 _atom_site_aniso_label
 _atom_site_aniso_U_11
 _atom_site_aniso_U_22
 _atom_site_aniso_U_33
 _atom_site_aniso_U_23
 _atom_site_aniso_U_13
 _atom_site_aniso_U_12
Si1 0.02629(16) 0.03297(17) 0.02863(16) -0.00281(11) 0.00430(11) -0.00146(11)
O1 0.0273(4) 0.0378(4) 0.0321(4) -0.0064(3) 0.0044(3) 0.0009(3)
B1 0.0338(7) 0.0412(7) 0.0487(8) -0.0105(6) 0.0142(6) -0.0038(6)
C1 0.0267(5) 0.0312(5) 0.0301(5) -0.0036(4) 0.0040(4) 0.0004(4)
C2 0.0288(5) 0.0324(6) 0.0397(6) -0.0053(5) 0.0083(5) -0.0013(4)
C3 0.0261(5) 0.0341(6) 0.0393(6) -0.0037(5) 0.0077(4) 0.0000(4)
C4 0.0300(5) 0.0398(6) 0.0366(6) -0.0033(5) 0.0099(5) -0.0026(5)
C5 0.0311(5) 0.0363(6) 0.0378(6) -0.0073(5) 0.0083(5) -0.0009(5)
C6 0.0289(5) 0.0303(5) 0.0318(5) -0.0039(4) 0.0064(4) -0.0014(4)
C7 0.0361(6) 0.0387(6) 0.0352(6) 0.0001(5) 0.0084(5) 0.0045(5)
C8 0.0401(7) 0.0481(8) 0.0491(7) -0.0066(6) 0.0126(6) 0.0096(6)
C9 0.0507(8) 0.0506(8) 0.0416(7) -0.0112(6) 0.0197(6) -0.0010(6)
C10 0.0719(10) 0.0527(8) 0.0327(6) 0.0008(6) 0.0148(6) 0.0075(7)
C11 0.0554(8) 0.0444(7) 0.0355(6) 0.0015(5) 0.0076(6) 0.0145(6)
C12 0.0405(7) 0.0616(9) 0.0579(9) -0.0285(7) 0.0135(6) -0.0150(6)
C13 0.0423(7) 0.0649(9) 0.0508(8) -0.0122(7) 0.0238(6) -0.0109(7)
C14 0.0754(12) 0.0951(14) 0.0531(9) -0.0176(9) 0.0358(9) -0.0198(10)
C15 0.0313(6) 0.0488(8) 0.0802(11) -0.0143(7) 0.0117(7) -0.0061(6)
C16 0.0334(7) 0.0681(11) 0.1102(15) -0.0011(11) -0.0055(8) 0.0000(7)
C17 0.0491(8) 0.0479(8) 0.0834(12) 0.0075(8) 0.0176(8) -0.0060(7)
C18 0.0859(13) 0.0669(11) 0.0609(10) 0.0058(9) 0.0237(9) -0.0239(10)
C19 0.0331(6) 0.0511(8) 0.0336(6) 0.0011(5) 0.0002(5) -0.0018(5)
C23 0.0385(6) 0.0355(6) 0.0421(7) -0.0005(5) 0.0084(5) -0.0040(5)
C20 0.0498(10) 0.0497(9) 0.0396(11) 0.0068(7) -0.0005(7) 0.0037(7)
C21 0.0648(14) 0.0659(12) 0.0403(8) -0.0031(8) -0.0130(9) -0.0177(10)
C22 0.0364(8) 0.0879(17) 0.0587(11) 0.0180(11) 0.0051(7) 0.0165(10)
C24 0.0605(12) 0.0368(8) 0.0571(9) -0.0042(7) 0.0136(9) -0.0023(8)
C25 0.0476(10) 0.0543(10) 0.0749(14) 0.0091(10) 0.0223(9) -0.0090(8)
C26 0.0743(14) 0.0476(12) 0.0433(10) 0.0110(8) -0.0011(9) -0.0160(9)
C20' 0.0498(10) 0.0497(9) 0.0396(11) 0.0068(7) -0.0005(7) 0.0037(7)
C21' 0.0648(14) 0.0659(12) 0.0403(8) -0.0031(8) -0.0130(9) -0.0177(10)
C22' 0.0364(8) 0.0879(17) 0.0587(11) 0.0180(11) 0.0051(7) 0.0165(10)
C24' 0.0605(12) 0.0368(8) 0.0571(9) -0.0042(7) 0.0136(9) -0.0023(8)
C25' 0.0476(10) 0.0543(10) 0.0749(14) 0.0091(10) 0.0223(9) -0.0090(8)
C26' 0.0743(14) 0.0476(12) 0.0433(10) 0.0110(8) -0.0011(9) -0.0160(9)
 
_geom_special_details
;
 All esds (except the esd in the dihedral angle between two l.s. planes)
 are estimated using the full covariance matrix.  The cell esds are taken
 into account individually in the estimation of esds in distances, angles
 and torsion angles; correlations between esds in cell parameters are only
 used when they are defined by crystal symmetry.  An approximate (isotropic)
 treatment of cell esds is used for estimating esds involving l.s. planes.
;
 
loop_
 _geom_bond_atom_site_label_1
 _geom_bond_atom_site_label_2
 _geom_bond_distance
 _geom_bond_site_symmetry_2
 _geom_bond_publ_flag
Si1 O1 1.6462(8) . ?
Si1 C5 1.8733(12) . ?
Si1 C19 1.9036(13) . ?
Si1 C23 1.9127(13) . ?
O1 C1 1.4295(13) . ?
B1 C15 1.570(2) . ?
B1 C17 1.574(2) . ?
B1 C3 1.6042(18) . ?
C1 C6 1.5172(15) . ?
C1 C2 1.5424(16) . ?
C1 H1 1.0000 . ?
C2 C12 1.5393(17) . ?
C2 C3 1.5596(16) . ?
C2 H2 1.0000 . ?
C3 C4 1.5562(16) . ?
C3 H3 1.0000 . ?
C4 C13 1.5451(17) . ?
C4 C5 1.5454(17) . ?
C4 H4 1.0000 . ?
C5 H5A 0.9900 . ?
C5 H5B 0.9900 . ?
C6 C11 1.3847(17) . ?
C6 C7 1.3889(16) . ?
C7 C8 1.3845(17) . ?
C7 H7 0.9500 . ?
C8 C9 1.383(2) . ?
C8 H8 0.9500 . ?
C9 C10 1.375(2) . ?
C9 H9 0.9500 . ?
C10 C11 1.3908(19) . ?
C10 H10 0.9500 . ?
C11 H11 0.9500 . ?
C12 H12A 0.9800 . ?
C12 H12B 0.9800 . ?
C12 H12C 0.9800 . ?
C13 C14 1.522(2) . ?
C13 H13A 0.9900 . ?
C13 H13B 0.9900 . ?
C14 H14A 0.9800 . ?
C14 H14B 0.9800 . ?
C14 H14C 0.9800 . ?
C15 C16 1.516(3) . ?
C15 H15A 0.9900 . ?
C15 H15B 0.9900 . ?
C16 H16A 0.9800 . ?
C16 H16B 0.9800 . ?
C16 H16C 0.9800 . ?
C17 C18 1.508(2) . ?
C17 H17A 0.9900 . ?
C17 H17B 0.9900 . ?
C18 H18A 0.9800 . ?
C18 H18B 0.9800 . ?
C18 H18C 0.9800 . ?
C19 C20' 1.520(9) . ?
C19 C21 1.528(2) . ?
C19 C22' 1.535(17) . ?
C19 C20 1.545(2) . ?
C19 C22 1.550(2) . ?
C19 C21' 1.564(9) . ?
C23 C24' 1.524(8) . ?
C23 C26 1.533(2) . ?
C23 C25 1.535(2) . ?
C23 C24 1.547(2) . ?
C23 C26' 1.554(9) . ?
C23 C25' 1.571(9) . ?
C20 H20A 0.9800 . ?
C20 H20B 0.9800 . ?
C20 H20C 0.9800 . ?
C21 H21A 0.9800 . ?
C21 H21B 0.9800 . ?
C21 H21C 0.9800 . ?
C22 H22A 0.9800 . ?
C22 H22B 0.9800 . ?
C22 H22C 0.9800 . ?
C24 H24A 0.9800 . ?
C24 H24B 0.9800 . ?
C24 H24C 0.9800 . ?
C25 H25A 0.9800 . ?
C25 H25B 0.9800 . ?
C25 H25C 0.9800 . ?
C26 H26A 0.9800 . ?
C26 H26B 0.9800 . ?
C26 H26C 0.9800 . ?
C20' H20D 0.9800 . ?
C20' H20E 0.9800 . ?
C20' H20F 0.9800 . ?
C21' H21D 0.9800 . ?
C21' H21E 0.9800 . ?
C21' H21F 0.9800 . ?
C22' H22D 0.9800 . ?
C22' H22E 0.9800 . ?
C22' H22F 0.9800 . ?
C24' H24D 0.9800 . ?
C24' H24E 0.9800 . ?
C24' H24F 0.9800 . ?
C25' H25D 0.9800 . ?
C25' H25E 0.9800 . ?
C25' H25F 0.9800 . ?
C26' H26D 0.9800 . ?
C26' H26E 0.9800 . ?
C26' H26F 0.9800 . ?
 
loop_
 _geom_angle_atom_site_label_1
 _geom_angle_atom_site_label_2
 _geom_angle_atom_site_label_3
 _geom_angle
 _geom_angle_site_symmetry_1
 _geom_angle_site_symmetry_3
 _geom_angle_publ_flag
O1 Si1 C5 107.13(5) . . ?
O1 Si1 C19 102.68(5) . . ?
C5 Si1 C19 112.25(6) . . ?
O1 Si1 C23 111.20(5) . . ?
C5 Si1 C23 108.41(6) . . ?
C19 Si1 C23 114.84(6) . . ?
C1 O1 Si1 125.88(7) . . ?
C15 B1 C17 119.06(13) . . ?
C15 B1 C3 122.93(13) . . ?
C17 B1 C3 117.99(12) . . ?
O1 C1 C6 106.33(8) . . ?
O1 C1 C2 110.74(9) . . ?
C6 C1 C2 113.77(9) . . ?
O1 C1 H1 108.6 . . ?
C6 C1 H1 108.6 . . ?
C2 C1 H1 108.6 . . ?
C12 C2 C1 109.50(10) . . ?
C12 C2 C3 107.93(10) . . ?
C1 C2 C3 114.65(10) . . ?
C12 C2 H2 108.2 . . ?
C1 C2 H2 108.2 . . ?
C3 C2 H2 108.2 . . ?
C4 C3 C2 118.97(9) . . ?
C4 C3 B1 107.91(10) . . ?
C2 C3 B1 107.28(10) . . ?
C4 C3 H3 107.4 . . ?
C2 C3 H3 107.4 . . ?
B1 C3 H3 107.4 . . ?
C13 C4 C5 109.11(11) . . ?
C13 C4 C3 108.97(10) . . ?
C5 C4 C3 114.49(10) . . ?
C13 C4 H4 108.0 . . ?
C5 C4 H4 108.0 . . ?
C3 C4 H4 108.0 . . ?
C4 C5 Si1 117.75(8) . . ?
C4 C5 H5A 107.9 . . ?
Si1 C5 H5A 107.9 . . ?
C4 C5 H5B 107.9 . . ?
Si1 C5 H5B 107.9 . . ?
H5A C5 H5B 107.2 . . ?
C11 C6 C7 118.55(11) . . ?
C11 C6 C1 121.21(11) . . ?
C7 C6 C1 120.24(10) . . ?
C8 C7 C6 120.61(12) . . ?
C8 C7 H7 119.7 . . ?
C6 C7 H7 119.7 . . ?
C9 C8 C7 120.19(13) . . ?
C9 C8 H8 119.9 . . ?
C7 C8 H8 119.9 . . ?
C10 C9 C8 119.81(12) . . ?
C10 C9 H9 120.1 . . ?
C8 C9 H9 120.1 . . ?
C9 C10 C11 119.91(13) . . ?
C9 C10 H10 120.0 . . ?
C11 C10 H10 120.0 . . ?
C6 C11 C10 120.91(13) . . ?
C6 C11 H11 119.5 . . ?
C10 C11 H11 119.5 . . ?
C2 C12 H12A 109.5 . . ?
C2 C12 H12B 109.5 . . ?
H12A C12 H12B 109.5 . . ?
C2 C12 H12C 109.5 . . ?
H12A C12 H12C 109.5 . . ?
H12B C12 H12C 109.5 . . ?
C14 C13 C4 115.08(13) . . ?
C14 C13 H13A 108.5 . . ?
C4 C13 H13A 108.5 . . ?
C14 C13 H13B 108.5 . . ?
C4 C13 H13B 108.5 . . ?
H13A C13 H13B 107.5 . . ?
C13 C14 H14A 109.5 . . ?
C13 C14 H14B 109.5 . . ?
H14A C14 H14B 109.5 . . ?
C13 C14 H14C 109.5 . . ?
H14A C14 H14C 109.5 . . ?
H14B C14 H14C 109.5 . . ?
C16 C15 B1 119.08(13) . . ?
C16 C15 H15A 107.5 . . ?
B1 C15 H15A 107.5 . . ?
C16 C15 H15B 107.5 . . ?
B1 C15 H15B 107.5 . . ?
H15A C15 H15B 107.0 . . ?
C15 C16 H16A 109.5 . . ?
C15 C16 H16B 109.5 . . ?
H16A C16 H16B 109.5 . . ?
C15 C16 H16C 109.5 . . ?
H16A C16 H16C 109.5 . . ?
H16B C16 H16C 109.5 . . ?
C18 C17 B1 120.62(15) . . ?
C18 C17 H17A 107.2 . . ?
B1 C17 H17A 107.2 . . ?
C18 C17 H17B 107.2 . . ?
B1 C17 H17B 107.2 . . ?
H17A C17 H17B 106.8 . . ?
C17 C18 H18A 109.5 . . ?
C17 C18 H18B 109.5 . . ?
H18A C18 H18B 109.5 . . ?
C17 C18 H18C 109.5 . . ?
H18A C18 H18C 109.5 . . ?
H18B C18 H18C 109.5 . . ?
C20' C19 C22' 118.2(11) . . ?
C21 C19 C20 107.55(13) . . ?
C21 C19 C22 109.76(15) . . ?
C20 C19 C22 106.14(14) . . ?
C20' C19 C21' 109.3(10) . . ?
C22' C19 C21' 103.8(10) . . ?
C20' C19 Si1 107.9(8) . . ?
C21 C19 Si1 113.06(12) . . ?
C22' C19 Si1 110.9(6) . . ?
C20 C19 Si1 109.73(10) . . ?
C22 C19 Si1 110.34(10) . . ?
C21' C19 Si1 106.1(7) . . ?
C26 C23 C25 108.63(15) . . ?
C26 C23 C24 107.70(14) . . ?
C25 C23 C24 108.09(14) . . ?
C24' C23 C26' 107.9(10) . . ?
C24' C23 C25' 106.8(9) . . ?
C26' C23 C25' 100.1(10) . . ?
C24' C23 Si1 119.7(6) . . ?
C26 C23 Si1 109.26(12) . . ?
C25 C23 Si1 112.94(11) . . ?
C24 C23 Si1 110.07(10) . . ?
C26' C23 Si1 109.7(9) . . ?
C25' C23 Si1 110.7(6) . . ?
C19 C20 H20A 109.5 . . ?
C19 C20 H20B 109.5 . . ?
H20A C20 H20B 109.5 . . ?
C19 C20 H20C 109.5 . . ?
H20A C20 H20C 109.5 . . ?
H20B C20 H20C 109.5 . . ?
C19 C21 H21A 109.5 . . ?
C19 C21 H21B 109.5 . . ?
H21A C21 H21B 109.5 . . ?
C19 C21 H21C 109.5 . . ?
H21A C21 H21C 109.5 . . ?
H21B C21 H21C 109.5 . . ?
C19 C22 H22A 109.5 . . ?
C19 C22 H22B 109.5 . . ?
H22A C22 H22B 109.5 . . ?
C19 C22 H22C 109.5 . . ?
H22A C22 H22C 109.5 . . ?
H22B C22 H22C 109.5 . . ?
C23 C24 H24A 109.5 . . ?
C23 C24 H24B 109.5 . . ?
H24A C24 H24B 109.5 . . ?
C23 C24 H24C 109.5 . . ?
H24A C24 H24C 109.5 . . ?
H24B C24 H24C 109.5 . . ?
C23 C25 H25A 109.5 . . ?
C23 C25 H25B 109.5 . . ?
H25A C25 H25B 109.5 . . ?
C23 C25 H25C 109.5 . . ?
H25A C25 H25C 109.5 . . ?
H25B C25 H25C 109.5 . . ?
C23 C26 H26A 109.5 . . ?
C23 C26 H26B 109.5 . . ?
H26A C26 H26B 109.5 . . ?
C23 C26 H26C 109.5 . . ?
H26A C26 H26C 109.5 . . ?
H26B C26 H26C 109.5 . . ?
C19 C20' H20D 109.5 . . ?
C19 C20' H20E 109.5 . . ?
H20D C20' H20E 109.5 . . ?
C19 C20' H20F 109.5 . . ?
H20D C20' H20F 109.5 . . ?
H20E C20' H20F 109.5 . . ?
C19 C21' H21D 109.5 . . ?
C19 C21' H21E 109.5 . . ?
H21D C21' H21E 109.5 . . ?
C19 C21' H21F 109.5 . . ?
H21D C21' H21F 109.5 . . ?
H21E C21' H21F 109.5 . . ?
C19 C22' H22D 109.5 . . ?
C19 C22' H22E 109.5 . . ?
H22D C22' H22E 109.5 . . ?
C19 C22' H22F 109.5 . . ?
H22D C22' H22F 109.5 . . ?
H22E C22' H22F 109.5 . . ?
C23 C24' H24D 109.5 . . ?
C23 C24' H24E 109.5 . . ?
H24D C24' H24E 109.5 . . ?
C23 C24' H24F 109.5 . . ?
H24D C24' H24F 109.5 . . ?
H24E C24' H24F 109.5 . . ?
C23 C25' H25D 109.5 . . ?
C23 C25' H25E 109.5 . . ?
H25D C25' H25E 109.5 . . ?
C23 C25' H25F 109.5 . . ?
H25D C25' H25F 109.5 . . ?
H25E C25' H25F 109.5 . . ?
C23 C26' H26D 109.5 . . ?
C23 C26' H26E 109.5 . . ?
H26D C26' H26E 109.5 . . ?
C23 C26' H26F 109.5 . . ?
H26D C26' H26F 109.5 . . ?
H26E C26' H26F 109.5 . . ?
 
_refine_diff_density_max    0.309
_refine_diff_density_min   -0.197
_refine_diff_density_rms    0.039

_shelx_res_file
;

    16kaw8h.res created by SHELXL-2014/7


TITL 16kaw8h in P2(1)/c
CELL 0.71073  10.38140   8.53130  30.79690  90.0000  99.6603  90.0000
ZERR    4.00   0.00040   0.00030   0.00110   0.0000   0.0005   0.0000
LATT  1
SYMM -X, 0.5+Y, 0.5-Z
SFAC C H B O SI
UNIT 104 188 4 4 4
LIST 4 ! automatically inserted. Change 6 to 4 for CHECKCIF!!
TEMP -73.150
SIZE 0.19 0.34 0.46
L.S. 6
ACTA
BOND $H
FMAP 2
PLAN -20

DFIX 1.54 0.01 C19 C20' C19 C21' C23 C24' C23 C25' C23 C26'
EADP C20 C20'
EADP C21 C21'
EADP C22 C22'
EADP C24 C24'
EADP C25 C25'
EADP C26 C26'

WGHT    0.071500    0.515200
FVAR       0.19488   0.88384
SI1   5    0.278202    0.475236    0.351597    11.00000    0.02629    0.03297 =
         0.02863   -0.00281    0.00430   -0.00146
O1    4    0.276791    0.618478    0.387329    11.00000    0.02734    0.03781 =
         0.03208   -0.00643    0.00437    0.00090
B1    3    0.687725    0.813166    0.380284    11.00000    0.03378    0.04119 =
         0.04867   -0.01053    0.01419   -0.00382
C1    1    0.375956    0.649399    0.424488    11.00000    0.02667    0.03115 =
         0.03008   -0.00365    0.00395    0.00037
AFIX  13
H1    2    0.419311    0.548215    0.434757    11.00000   -1.20000
AFIX   0
C2    1    0.480039    0.761846    0.411888    11.00000    0.02881    0.03241 =
         0.03974   -0.00527    0.00825   -0.00134
AFIX  13
H2    2    0.434039    0.848245    0.393544    11.00000   -1.20000
AFIX   0
C3    1    0.578903    0.684212    0.385501    11.00000    0.02615    0.03407 =
         0.03926   -0.00374    0.00775    0.00002
AFIX  13
H3    2    0.623476    0.597398    0.404041    11.00000   -1.20000
AFIX   0
C4    1    0.527278    0.615093    0.339077    11.00000    0.02997    0.03983 =
         0.03662   -0.00326    0.00986   -0.00256
AFIX  13
H4    2    0.469015    0.694975    0.322005    11.00000   -1.20000
AFIX   0
C5    1    0.448758    0.461360    0.339504    11.00000    0.03109    0.03631 =
         0.03777   -0.00726    0.00828   -0.00086
AFIX  23
H5A   2    0.498851    0.390536    0.361607    11.00000   -1.20000
H5B   2    0.444408    0.410683    0.310375    11.00000   -1.20000
AFIX   0
C6    1    0.306259    0.712309    0.460381    11.00000    0.02892    0.03032 =
         0.03177   -0.00386    0.00645   -0.00137
C7    1    0.212725    0.829315    0.450928    11.00000    0.03608    0.03869 =
         0.03525    0.00011    0.00837    0.00451
AFIX  43
H7    2    0.192036    0.869307    0.421802    11.00000   -1.20000
AFIX   0
C8    1    0.149363    0.888204    0.483559    11.00000    0.04009    0.04809 =
         0.04908   -0.00664    0.01261    0.00958
AFIX  43
H8    2    0.086557    0.969395    0.476831    11.00000   -1.20000
AFIX   0
C9    1    0.177248    0.829153    0.525933    11.00000    0.05073    0.05059 =
         0.04162   -0.01118    0.01971   -0.00105
AFIX  43
H9    2    0.132411    0.868192    0.548147    11.00000   -1.20000
AFIX   0
C10   1    0.270011    0.713835    0.535803    11.00000    0.07186    0.05273 =
         0.03273    0.00082    0.01482    0.00745
AFIX  43
H10   2    0.290590    0.674396    0.564993    11.00000   -1.20000
AFIX   0
C11   1    0.333702    0.654975    0.502996    11.00000    0.05536    0.04442 =
         0.03552    0.00148    0.00762    0.01445
AFIX  43
H11   2    0.396906    0.574320    0.509920    11.00000   -1.20000
AFIX   0
C12   1    0.558461    0.834701    0.453897    11.00000    0.04055    0.06158 =
         0.05787   -0.02846    0.01348   -0.01500
AFIX 137
H12A  2    0.623480    0.907634    0.445846    11.00000   -1.50000
H12B  2    0.602838    0.751531    0.472664    11.00000   -1.50000
H12C  2    0.498993    0.891321    0.469925    11.00000   -1.50000
AFIX   0
C13   1    0.644133    0.586388    0.314934    11.00000    0.04226    0.06493 =
         0.05081   -0.01223    0.02382   -0.01092
AFIX  23
H13A  2    0.700797    0.680427    0.318541    11.00000   -1.20000
H13B  2    0.696023    0.497668    0.329358    11.00000   -1.20000
AFIX   0
C14   1    0.607762    0.550696    0.266000    11.00000    0.07536    0.09507 =
         0.05306   -0.01755    0.03578   -0.01982
AFIX 137
H14A  2    0.551881    0.634596    0.251545    11.00000   -1.50000
H14B  2    0.560636    0.450810    0.262028    11.00000   -1.50000
H14C  2    0.687347    0.543694    0.252912    11.00000   -1.50000
AFIX   0
C15   1    0.836100    0.792056    0.400186    11.00000    0.03127    0.04880 =
         0.08018   -0.01432    0.01171   -0.00608
AFIX  23
H15A  2    0.886553    0.804015    0.375814    11.00000   -1.20000
H15B  2    0.861413    0.879901    0.420865    11.00000   -1.20000
AFIX   0
C16   1    0.880500    0.641413    0.424227    11.00000    0.03345    0.06814 =
         0.11023   -0.00107   -0.00550    0.00004
AFIX 137
H16A  2    0.854014    0.551777    0.404881    11.00000   -1.50000
H16B  2    0.840354    0.632844    0.450748    11.00000   -1.50000
H16C  2    0.975835    0.642226    0.432595    11.00000   -1.50000
AFIX   0
C17   1    0.641823    0.969122    0.355012    11.00000    0.04906    0.04788 =
         0.08343    0.00754    0.01756   -0.00605
AFIX  23
H17A  2    0.584132    0.938966    0.327334    11.00000   -1.20000
H17B  2    0.586876    1.026471    0.373060    11.00000   -1.20000
AFIX   0
C18   1    0.740460    1.084113    0.342991    11.00000    0.08590    0.06687 =
         0.06091    0.00577    0.02371   -0.02387
AFIX 137
H18A  2    0.794752    1.032243    0.324139    11.00000   -1.50000
H18B  2    0.795970    1.121805    0.369864    11.00000   -1.50000
H18C  2    0.694742    1.173002    0.327158    11.00000   -1.50000
AFIX   0
C19   1    0.157402    0.546512    0.302112    11.00000    0.03309    0.05107 =
         0.03365    0.00113    0.00020   -0.00177
C23   1    0.234284    0.279302    0.375535    11.00000    0.03855    0.03545 =
         0.04209   -0.00046    0.00839   -0.00398
PART 1
C20   1    0.215909    0.687551    0.280667    21.00000    0.04977    0.04972 =
         0.03965    0.00678   -0.00048    0.00367
AFIX 137
H20A  2    0.292962    0.653343    0.268681    21.00000   -1.50000
H20B  2    0.241290    0.769076    0.302873    21.00000   -1.50000
H20C  2    0.150582    0.729688    0.256845    21.00000   -1.50000
AFIX   0
C21   1    0.123032    0.420988    0.266647    21.00000    0.06479    0.06591 =
         0.04032   -0.00312   -0.01296   -0.01772
AFIX 137
H21A  2    0.067340    0.466794    0.240935    21.00000   -1.50000
H21B  2    0.076328    0.334999    0.278299    21.00000   -1.50000
H21C  2    0.203390    0.380688    0.257970    21.00000   -1.50000
AFIX   0
C22   1    0.030968    0.607447    0.316965    21.00000    0.03636    0.08790 =
         0.05874    0.01799    0.00514    0.01651
AFIX 137
H22A  2   -0.028150    0.649435    0.291454    21.00000   -1.50000
H22B  2    0.053188    0.690390    0.338962    21.00000   -1.50000
H22C  2   -0.012050    0.521031    0.329867    21.00000   -1.50000
AFIX   0
C24   1    0.262377    0.143109    0.345297    21.00000    0.06052    0.03678 =
         0.05706   -0.00420    0.01360   -0.00225
AFIX 137
H24A  2    0.205374    0.152649    0.316641    21.00000   -1.50000
H24B  2    0.245636    0.042906    0.358881    21.00000   -1.50000
H24C  2    0.353918    0.147497    0.341215    21.00000   -1.50000
AFIX   0
C25   1    0.090280    0.269463    0.381008    21.00000    0.04762    0.05425 =
         0.07491    0.00906    0.02228   -0.00904
AFIX 137
H25A  2    0.034537    0.279491    0.352131    21.00000   -1.50000
H25B  2    0.070483    0.354369    0.400287    21.00000   -1.50000
H25C  2    0.073859    0.168247    0.394102    21.00000   -1.50000
AFIX   0
C26   1    0.319778    0.254704    0.420665    21.00000    0.07430    0.04757 =
         0.04333    0.01097   -0.00111   -0.01598
AFIX 137
H26A  2    0.303937    0.149880    0.431672    21.00000   -1.50000
H26B  2    0.298011    0.333816    0.441342    21.00000   -1.50000
H26C  2    0.412047    0.264688    0.417835    21.00000   -1.50000
AFIX   0
PART 2
C20'  1    0.194609    0.713264    0.292001   -21.00000    0.04977    0.04972 =
         0.03965    0.00678   -0.00048    0.00367
AFIX 137
H20D  2    0.144653    0.745768    0.263564   -21.00000   -1.50000
H20E  2    0.288243    0.717865    0.290756   -21.00000   -1.50000
H20F  2    0.174921    0.783670    0.315165   -21.00000   -1.50000
AFIX   0
C21'  1    0.176185    0.437292    0.262883   -21.00000    0.06479    0.06591 =
         0.04032   -0.00312   -0.01296   -0.01772
AFIX 137
H21D  2    0.105658    0.456010    0.238002   -21.00000   -1.50000
H21E  2    0.174168    0.327531    0.272131   -21.00000   -1.50000
H21F  2    0.260502    0.459880    0.253928   -21.00000   -1.50000
AFIX   0
C22'  1    0.016217    0.514597    0.308476   -21.00000    0.03636    0.08790 =
         0.05874    0.01799    0.00514    0.01651
AFIX 137
H22D  2   -0.044340    0.559518    0.283772   -21.00000   -1.50000
H22E  2    0.000938    0.562665    0.336063   -21.00000   -1.50000
H22F  2    0.001936    0.401237    0.309654   -21.00000   -1.50000
AFIX   0
C24'  1    0.191449    0.142084    0.344826   -21.00000    0.06052    0.03678 =
         0.05706   -0.00420    0.01360   -0.00225
AFIX 137
H24D  2    0.250600    0.132518    0.323289   -21.00000   -1.50000
H24E  2    0.102221    0.160254    0.329384   -21.00000   -1.50000
H24F  2    0.193974    0.045221    0.362054   -21.00000   -1.50000
AFIX   0
C25'  1    0.125659    0.302222    0.404872   -21.00000    0.04762    0.05425 =
         0.07491    0.00906    0.02228   -0.00904
AFIX 137
H25D  2    0.049202    0.352690    0.387448   -21.00000   -1.50000
H25E  2    0.159598    0.368363    0.430238   -21.00000   -1.50000
H25F  2    0.100416    0.199910    0.415232   -21.00000   -1.50000
AFIX   0
C26'  1    0.349423    0.222780    0.411007   -21.00000    0.07430    0.04757 =
         0.04333    0.01097   -0.00111   -0.01598
AFIX 137
H26D  2    0.425625    0.200709    0.397042   -21.00000   -1.50000
H26E  2    0.323700    0.127272    0.425029   -21.00000   -1.50000
H26F  2    0.371531    0.304727    0.433312   -21.00000   -1.50000
PART 0
AFIX   0
HKLF 4

REM  16kaw8h in P2(1)/c
REM R1 =  0.0434 for    5673 Fo > 4sig(Fo)  and  0.0508 for all    6670 data
REM    297 parameters refined using      5 restraints

END

WGHT      0.0710      0.5174

REM Highest difference peak  0.309,  deepest hole -0.197,  1-sigma level  0.039
Q1    1   0.2113  0.5127  0.3235  11.00000  0.05    0.31
Q2    1   0.3727  0.4721  0.3470  11.00000  0.05    0.30
Q3    1   0.5444  0.9800  0.3430  11.00000  0.05    0.29
Q4    1   0.6242  0.7489  0.3830  11.00000  0.05    0.28
Q5    1   0.2528  0.3618  0.3619  11.00000  0.05    0.28
Q6    1   0.3436  0.6914  0.4437  11.00000  0.05    0.27
Q7    1   0.4294  0.7085  0.4185  11.00000  0.05    0.27
Q8    1   0.5783  0.6064  0.3252  11.00000  0.05    0.25
Q9    1   0.5246  0.7236  0.3973  11.00000  0.05    0.25
Q10   1   0.2684  0.7700  0.4564  11.00000  0.05    0.24
Q11   1   0.6387  0.9378  0.3336  11.00000  0.05    0.24
Q12   1   0.8620  0.6871  0.4497  11.00000  0.05    0.24
Q13   1   0.6793  0.9064  0.3678  11.00000  0.05    0.23
Q14   1   0.2872  0.5613  0.3747  11.00000  0.05    0.22
Q15   1   0.5489  0.6581  0.3616  11.00000  0.05    0.22
Q16   1   0.4800  0.5411  0.3407  11.00000  0.05    0.21
Q17   1   0.7650  0.7984  0.3929  11.00000  0.05    0.21
Q18   1   0.1040  0.5796  0.3087  11.00000  0.05    0.21
Q19   1   0.3307  0.7074  0.4814  11.00000  0.05    0.19
Q20   1   0.1569  0.6705  0.3015  11.00000  0.05    0.19
;
_shelx_res_checksum   98916

_shelx_hkl_file
;
   1   0   0  368.54    7.28
  -1   0   0  366.82    7.40
  -1   0   0  358.57    7.27
  -1   0   0  369.95    7.40
   1   0   0  370.89    7.40
   2   0   0  940.94   18.87
  -2   0   0  956.44   19.00
   2   0   0  945.88   18.97
  -2   0   0  962.13   18.98
  -2   0   0  927.47   20.47
   2   0   0  967.29   18.72
   3   0   0   -0.03    0.04
  -3   0   0    0.03    0.04
  -3   0   0    0.06    0.03
  -3   0   0    0.09    0.05
   3   0   0    0.09    0.04
  -4   0   0    8.97    0.23
  -4   0   0    8.93    0.29
  -4   0   0    9.42    0.30
   4   0   0    9.20    0.27
   4   0   0    8.58    0.29
  -5   0   0   55.54    1.27
  -5   0   0   56.58    1.28
   5   0   0   56.26    1.27
  -5   0   0   55.24    1.16
   5   0   0   56.97    1.23
   6   0   0   -0.02    0.06
  -6   0   0    0.03    0.07
  -6   0   0    0.00    0.07
   6   0   0    0.01    0.07
  -6   0   0    0.02    0.04
   7   0   0   80.61    1.73
  -7   0   0   79.51    1.79
  -7   0   0   79.62    1.63
  -7   0   0   77.67    1.79
   7   0   0   76.28    1.78
   8   0   0    1.17    0.15
   8   0   0    1.39    0.19
  -8   0   0    0.92    0.16
   9   0   0   14.22    0.54
  -9   0   0   13.59    0.53
   9   0   0   13.30    0.47
  10   0   0    1.32    0.22
  10   0   0    1.28    0.19
 -10   0   0    1.41    0.23
  11   0   0    9.26    0.49
 -11   0   0   11.33    0.53
  12   0   0    4.39    0.42
 -12   0   0    4.35    0.36
 -13   0   0    0.11    0.19
  13   0   0    0.38    0.21
   0  -1   0   -0.18    0.02
   0   1   0   -0.15    0.02
   0   1   0   -0.14    0.02
   1  -1   0    0.00    0.02
   1  -1   0   -0.01    0.03
  -1  -1   0   -0.02    0.02
   1  -1   0    0.04    0.02
  -1  -1   0    0.00    0.03
   1   1   0   -0.03    0.02
  -1   1   0   -0.04    0.03
   1   1   0   -0.02    0.03
  -1   1   0    0.02    0.02
  -2  -1   0    4.00    0.13
   2  -1   0    3.88    0.11
   2  -1   0    3.97    0.14
  -2  -1   0    4.04    0.14
   2  -1   0    4.17    0.12
   2   1   0    3.82    0.14
  -2   1   0    3.76    0.14
  -2   1   0    3.93    0.11
   2   1   0    4.20    0.12
  -2   1   0    3.69    0.13
  -3  -1   0  323.76    6.61
   3  -1   0  329.56    6.55
  -3  -1   0  328.64    6.56
  -3   1   0  341.45    6.56
  -3   1   0  330.20    6.57
   3   1   0  335.33    6.56
   3   1   0  322.81    6.60
  -3   1   0  332.97    6.55
  -4  -1   0    0.42    0.06
  -4  -1   0    0.37    0.08
   4  -1   0    0.46    0.08
  -4   1   0    0.41    0.08
  -4   1   0    0.44    0.04
   4   1   0    0.57    0.07
  -4   1   0    0.35    0.07
   4   1   0    0.37    0.08
   5  -1   0    0.34    0.08
  -5  -1   0    0.32    0.06
   5  -1   0    0.36    0.09
  -5   1   0    0.25    0.08
  -5   1   0    0.35    0.09
  -5   1   0    0.31    0.04
   5   1   0    0.36    0.07
   5   1   0    0.37    0.09
  -6  -1   0   14.56    0.47
   6  -1   0   15.69    0.46
  -6  -1   0   14.57    0.39
   6  -1   0   14.32    0.47
   6   1   0   14.90    0.42
  -6   1   0   15.23    0.47
  -6   1   0   15.28    0.48
  -6   1   0   14.54    0.34
   6   1   0   14.89    0.47
   7  -1   0    7.64    0.32
   7  -1   0    7.51    0.34
  -7  -1   0    8.73    0.36
  -7  -1   0    7.87    0.26
  -7   1   0    7.79    0.34
  -7   1   0    8.07    0.36
  -7   1   0    7.62    0.21
   7   1   0    7.98    0.34
   7   1   0    7.60    0.29
  -8  -1   0    1.73    0.21
  -8  -1   0    1.93    0.14
   8  -1   0    1.70    0.21
   8  -1   0    2.25    0.19
   8   1   0    1.99    0.17
  -8   1   0    1.96    0.22
  -8   1   0    1.72    0.22
   8   1   0    2.25    0.23
   9  -1   0    0.46    0.14
   9  -1   0    0.47    0.15
  -9  -1   0    0.42    0.15
   9   1   0    0.38    0.16
  -9   1   0    0.51    0.15
  -9   1   0    0.16    0.12
   9   1   0    0.36    0.11
  10  -1   0    3.92    0.31
  10  -1   0    4.23    0.29
 -10  -1   0    4.38    0.32
  10   1   0    4.60    0.27
 -10   1   0    4.77    0.34
  10   1   0    4.38    0.32
 -10   1   0    3.81    0.30
  11  -1   0    5.09    0.37
 -11  -1   0    5.91    0.38
  11  -1   0    4.85    0.33
 -11   1   0    5.84    0.38
  11   1   0    5.36    0.38
  12  -1   0    0.58    0.22
 -12  -1   0    0.57    0.21
 -12   1   0    0.76    0.23
  12   1   0    0.70    0.22
  13  -1   0    0.29    0.20
 -13  -1   0    0.25    0.20
  13   1   0    0.59    0.23
 -13   1   0    0.49    0.21
   0  -2   0  140.98    2.83
   0   2   0  138.96    2.82
   0   2   0  142.12    2.83
  -1  -2   0    3.03    0.10
   1  -2   0    3.06    0.09
  -1  -2   0    2.93    0.13
   1  -2   0    2.93    0.12
   1   2   0    2.86    0.11
  -1   2   0    3.13    0.13
  -1   2   0    2.96    0.08
   1   2   0    2.97    0.12
  -1   2   0    2.84    0.13
  -2  -2   0   21.44    0.52
  -2  -2   0   20.97    0.49
   2  -2   0   21.75    0.49
   2  -2   0   21.80    0.53
  -2   2   0   21.52    0.52
  -2   2   0   21.38    0.53
   2   2   0   21.54    0.49
  -2   2   0   21.72    0.48
   2   2   0   21.86    0.52
   3  -2   0   30.51    0.72
  -3  -2   0   29.07    0.69
  -3  -2   0   30.24    0.69
   3  -2   0   30.20    0.65
   3   2   0   29.29    0.66
  -3   2   0   30.15    0.71
   3   2   0   29.78    0.71
  -3   2   0   29.55    0.67
  -4  -2   0    3.86    0.17
  -4  -2   0    3.54    0.18
   4  -2   0    3.61    0.13
   4  -2   0    3.93    0.19
   4   2   0    3.34    0.15
  -4   2   0    3.79    0.19
  -4   2   0    3.58    0.17
   4   2   0    3.73    0.18
  -5  -2   0    0.01    0.06
  -5  -2   0    0.05    0.07
   5  -2   0    0.03    0.07
   5  -2   0    0.07    0.04
  -5   2   0   -0.01    0.05
   5   2   0    0.06    0.07
   5   2   0    0.04    0.05
  -5   2   0    0.03    0.07
   6  -2   0    3.07    0.20
  -6  -2   0    3.34    0.17
  -6  -2   0    3.14    0.20
   6  -2   0    3.22    0.12
   6   2   0    3.02    0.16
   6   2   0    2.84    0.20
  -6   2   0    3.01    0.19
  -6   2   0    3.49    0.22
   7  -2   0   21.68    0.49
   7  -2   0   22.23    0.68
  -7  -2   0   22.16    0.58
  -7  -2   0   20.87    0.65
   7  -2   0   22.84    0.66
   7   2   0   22.87    0.67
   7   2   0   23.05    0.59
  -7   2   0   22.72    0.68
  -7   2   0   22.05    0.65
  -8  -2   0   11.87    0.47
   8  -2   0   11.49    0.45
   8  -2   0   11.37    0.47
  -8  -2   0   12.11    0.38
   8   2   0   12.12    0.40
  -8   2   0   11.68    0.46
  -8   2   0   11.86    0.48
   8   2   0   12.34    0.48
   9  -2   0   14.72    0.55
  -9  -2   0   15.98    0.58
   9  -2   0   15.43    0.59
   9   2   0   15.65    0.58
   9   2   0   16.06    0.50
  -9   2   0   16.05    0.57
  -9   2   0   15.60    0.60
  10  -2   0    4.86    0.34
  10  -2   0    4.84    0.32
 -10  -2   0    4.96    0.35
  10   2   0    4.64    0.33
 -10   2   0    4.56    0.34
 -10   2   0    4.23    0.31
  11  -2   0   17.44    0.65
 -11  -2   0   19.35    0.72
  11  -2   0   18.75    0.72
 -11   2   0   17.61    0.68
  11   2   0   16.81    0.68
 -11   2   0   17.18    0.70
  12  -2   0    3.35    0.38
 -12  -2   0    3.52    0.37
  12  -2   0    3.37    0.35
 -12   2   0    2.95    0.34
  12   2   0    3.91    0.39
 -12   2   0    3.57    0.40
 -13  -2   0    2.54    0.35
  13  -2   0    3.46    0.41
  13   2   0    3.43    0.40
 -13   2   0    3.10    0.37
   0  -3   0   -0.05    0.04
   0   3   0   -0.06    0.04
   0   3   0   -0.05    0.04
  -1  -3   0   -0.03    0.03
   1  -3   0    0.01    0.05
  -1  -3   0   -0.02    0.05
   1  -3   0   -0.02    0.02
   1   3   0    0.00    0.05
  -1   3   0    0.02    0.05
  -1   3   0   -0.02    0.02
   1   3   0   -0.04    0.04
  -1   3   0   -0.01    0.05
  -2  -3   0   80.93    1.73
  -2  -3   0   79.26    1.66
   2  -3   0   80.12    1.74
   2  -3   0   78.96    1.69
  -2   3   0   84.96    1.74
   2   3   0   83.27    1.73
   2   3   0   80.28    1.69
  -2   3   0   81.79    1.64
  -2   3   0   81.96    1.74
  -3  -3   0    9.48    0.32
   3  -3   0    9.96    0.28
   3  -3   0    9.80    0.34
  -3  -3   0    9.62    0.29
  -3   3   0    9.09    0.27
  -3   3   0   10.01    0.33
   3   3   0    9.78    0.28
  -3   3   0    9.49    0.33
   3   3   0    9.28    0.31
  -4  -3   0    0.89    0.11
  -4  -3   0    0.89    0.11
   4  -3   0    0.89    0.13
   4  -3   0    1.05    0.10
  -4   3   0    1.08    0.11
   4   3   0    1.00    0.13
   4   3   0    1.13    0.11
  -4   3   0    0.96    0.13
   5  -3   0    2.14    0.12
  -5  -3   0    2.14    0.15
  -5  -3   0    2.51    0.18
   5  -3   0    2.59    0.19
   5   3   0    2.57    0.14
   5   3   0    2.11    0.17
  -5   3   0    2.46    0.16
  -5   3   0    2.30    0.18
   6  -3   0    8.88    0.25
  -6  -3   0    8.74    0.35
   6  -3   0    8.69    0.36
  -6  -3   0    8.00    0.32
   6   3   0    9.37    0.37
  -6   3   0    8.23    0.36
   6   3   0    8.92    0.30
  -6   3   0    7.92    0.33
   7  -3   0    0.13    0.11
  -7  -3   0    0.33    0.12
  -7  -3   0    0.17    0.09
   7   3   0    0.28    0.09
   7   3   0    0.20    0.11
  -7   3   0    0.14    0.10
  -7   3   0    0.22    0.11
  -8  -3   0   12.44    0.49
   8  -3   0   12.37    0.50
  -8  -3   0   12.93    0.43
   8   3   0   12.19    0.41
  -8   3   0   12.65    0.47
   8   3   0   12.95    0.50
  -8   3   0   13.08    0.52
   9  -3   0    1.73    0.23
   9  -3   0    1.68    0.23
  -9  -3   0    1.58    0.27
  -9  -3   0    1.70    0.23
  -9   3   0    1.24    0.20
   9   3   0    1.49    0.22
  -9   3   0    1.23    0.21
 -10  -3   0    4.27    0.34
  10  -3   0    4.06    0.33
  10  -3   0    4.53    0.32
 -10   3   0    4.42    0.31
  10   3   0    4.17    0.33
 -10   3   0    4.50    0.35
  11  -3   0    7.79    0.44
  11  -3   0    7.80    0.46
 -11  -3   0    7.72    0.44
  11   3   0    8.04    0.47
 -11   3   0    7.28    0.46
 -11   3   0    7.76    0.43
  12  -3   0    0.57    0.20
 -12  -3   0    0.41    0.20
  12  -3   0    0.44    0.20
  12   3   0    0.39    0.20
 -12   3   0    0.22    0.18
 -12   3   0    0.39    0.18
  13  -3   0    0.79    0.25
 -13  -3   0    1.12    0.27
 -13   3   0    1.06    0.27
  13   3   0    1.00    0.25
 -13   3   0    1.23    0.28
   0  -4   0   10.42    0.34
   0   4   0   10.99    0.34
   0   4   0   10.40    0.34
  -1  -4   0    4.07    0.20
   1  -4   0    3.93    0.19
  -1  -4   0    4.28    0.12
   1   4   0    4.15    0.20
   1   4   0    4.15    0.19
  -1   4   0    4.37    0.21
  -1   4   0    4.26    0.20
  -2  -4   0    4.92    0.24
   2  -4   0    5.01    0.24
  -2  -4   0    4.93    0.17
   2  -4   0    4.89    0.21
  -2   4   0    4.62    0.22
  -2   4   0    5.14    0.14
   2   4   0    5.00    0.21
  -2   4   0    5.22    0.24
   2   4   0    4.71    0.22
   3  -4   0    7.39    0.26
  -3  -4   0    7.26    0.29
  -3  -4   0    7.36    0.24
   3  -4   0    7.24    0.31
  -3   4   0    7.17    0.29
   3   4   0    6.88    0.28
  -3   4   0    7.45    0.22
  -3   4   0    7.80    0.32
   3   4   0    7.43    0.26
   4  -4   0    7.59    0.27
  -4  -4   0    7.86    0.28
  -4  -4   0    8.25    0.32
   4  -4   0    8.06    0.34
   4   4   0    7.50    0.27
  -4   4   0    8.46    0.35
  -4   4   0    8.05    0.26
   4   4   0    7.72    0.31
  -4   4   0    7.53    0.32
  -5  -4   0    9.45    0.36
   5  -4   0   10.24    0.31
   5  -4   0    9.98    0.40
  -5  -4   0    9.89    0.35
  -5   4   0    9.82    0.33
   5   4   0   10.36    0.38
   5   4   0   10.23    0.33
  -5   4   0    9.97    0.39
   6  -4   0    1.81    0.13
   6  -4   0    1.78    0.21
  -6  -4   0    1.83    0.19
  -6  -4   0    2.13    0.20
  -6   4   0    1.88    0.17
  -6   4   0    1.80    0.21
   6   4   0    1.81    0.15
   6   4   0    1.81    0.20
  -7  -4   0    0.42    0.13
   7  -4   0    0.67    0.16
  -7  -4   0    0.85    0.15
   7   4   0    0.83    0.12
   7   4   0    1.07    0.18
  -7   4   0    0.45    0.14
  -7   4   0    0.74    0.13
  -8  -4   0    1.85    0.23
  -8  -4   0    1.29    0.18
   8  -4   0    1.79    0.24
  -8   4   0    1.09    0.20
  -8   4   0    1.44    0.19
   8   4   0    1.73    0.23
  -9  -4   0    1.53    0.22
  -9  -4   0    1.70    0.20
   9  -4   0    1.47    0.24
  -9   4   0    1.40    0.21
   9   4   0    1.36    0.22
  -9   4   0    1.43    0.23
  10  -4   0    0.95    0.21
  10  -4   0    1.15    0.24
 -10  -4   0    1.08    0.23
  10   4   0    1.12    0.22
 -10   4   0    1.02    0.20
 -10   4   0    0.85    0.22
  11  -4   0    0.66    0.21
  11  -4   0    0.76    0.22
 -11  -4   0    0.90    0.21
 -11   4   0    0.63    0.20
  11   4   0    0.67    0.22
 -11   4   0    0.73    0.22
 -12  -4   0    0.61    0.23
  12  -4   0    0.71    0.22
  12  -4   0    0.70    0.22
 -12   4   0    0.84    0.25
 -12   4   0    0.84    0.23
  12   4   0    0.68    0.21
   0  -5   0    0.04    0.07
   0   5   0    0.00    0.07
   0   5   0   -0.12    0.06
  -1  -5   0   92.53    2.05
   1  -5   0   92.96    2.03
  -1  -5   0   92.88    1.86
   1   5   0  100.98    1.92
   1   5   0   95.09    1.87
   1   5   0   92.92    2.02
  -1   5   0   92.91    2.04
  -1   5   0   93.37    2.05
   1   5   0   91.96    2.03
   2  -5   0   20.82    0.57
  -2  -5   0   19.44    0.47
   2  -5   0   20.46    0.61
  -2  -5   0   21.40    0.61
  -2   5   0   20.16    0.59
   2   5   0   19.00    0.57
  -2   5   0   21.16    0.61
   2   5   0   20.06    0.56
   3  -5   0    4.82    0.23
  -3  -5   0    4.78    0.19
   3  -5   0    4.69    0.26
  -3  -5   0    5.08    0.27
  -3   5   0    4.99    0.27
  -3   5   0    4.84    0.26
  -3   5   0    4.80    0.16
   3   5   0    5.06    0.25
   3   5   0    4.78    0.22
   4  -5   0   13.06    0.40
  -4  -5   0   12.67    0.45
  -4  -5   0   12.84    0.39
   4  -5   0   12.51    0.47
   4   5   0   12.83    0.40
  -4   5   0   13.05    0.48
  -4   5   0   12.89    0.46
   4   5   0   11.82    0.44
  -4   5   0   12.36    0.35
  -5  -5   0    3.05    0.19
   5  -5   0    2.74    0.24
   5  -5   0    3.63    0.20
  -5  -5   0    2.79    0.23
   5   5   0    2.82    0.22
  -5   5   0    3.30    0.24
  -5   5   0    3.27    0.18
   5   5   0    3.46    0.19
  -6  -5   0    4.18    0.25
   6  -5   0    4.52    0.30
   6  -5   0    3.98    0.21
  -6  -5   0    4.53    0.27
  -6   5   0    4.19    0.22
  -6   5   0    3.99    0.28
   6   5   0    4.15    0.27
   6   5   0    4.24    0.22
   7  -5   0    1.80    0.25
  -7  -5   0    1.69    0.21
  -7  -5   0    1.79    0.21
  -7   5   0    1.94    0.20
   7   5   0    2.11    0.25
   7   5   0    1.71    0.17
  -7   5   0    1.80    0.24
  -8  -5   0    0.13    0.12
   8  -5   0    0.26    0.16
  -8  -5   0    0.23    0.14
  -8   5   0    0.16    0.14
  -8   5   0    0.24    0.13
   8   5   0    0.21    0.13
   9  -5   0   -0.04    0.13
  -9  -5   0   -0.08    0.12
  -9  -5   0    0.00    0.13
   9   5   0   -0.07    0.13
  -9   5   0   -0.11    0.12
  -9   5   0   -0.11    0.12
 -10  -5   0    2.50    0.30
  10  -5   0    2.19    0.31
  10   5   0    2.58    0.31
 -10   5   0    2.52    0.28
 -10   5   0    2.39    0.32
  11  -5   0    0.30    0.19
  11  -5   0    0.03    0.16
 -11  -5   0    0.21    0.16
 -11   5   0    0.08    0.16
  11   5   0    0.08    0.16
 -11   5   0    0.16    0.17
  12  -5   0    3.38    0.38
 -12  -5   0    2.90    0.35
  12  -5   0    2.70    0.36
 -12   5   0    2.22    0.35
  12   5   0    2.83    0.36
   0  -6   0   16.91    0.55
   0   6   0   16.74    0.54
   0   6   0   17.12    0.55
   1  -6   0    1.02    0.15
  -1  -6   0    1.14    0.17
   1   6   0    1.15    0.15
  -1   6   0    1.16    0.16
  -1   6   0    0.83    0.15
   1   6   0    1.01    0.16
   2  -6   0   17.89    0.58
  -2  -6   0   17.19    0.41
   2  -6   0   17.93    0.55
  -2  -6   0   17.25    0.57
  -2   6   0   18.16    0.58
   2   6   0   17.89    0.54
   2   6   0   17.45    0.56
  -2   6   0   17.31    0.57
   3  -6   0    2.24    0.18
  -3  -6   0    2.24    0.23
  -3  -6   0    2.30    0.13
   3  -6   0    2.63    0.25
  -3   6   0    2.14    0.22
  -3   6   0    2.05    0.23
   3   6   0    1.91    0.17
   3   6   0    2.33    0.23
   4  -6   0    0.25    0.11
   4  -6   0    0.40    0.14
  -4  -6   0    0.14    0.11
  -4  -6   0    0.31    0.09
   4   6   0    0.21    0.10
  -4   6   0    0.39    0.14
   4   6   0    0.45    0.14
  -4   6   0    0.09    0.11
   5  -6   0    3.23    0.23
  -5  -6   0    3.04    0.20
  -5  -6   0    3.37    0.26
   5  -6   0    3.72    0.29
  -5   6   0    3.76    0.28
   5   6   0    3.42    0.22
   5   6   0    3.34    0.26
  -6  -6   0    2.70    0.21
   6  -6   0    2.56    0.28
  -6  -6   0    2.65    0.26
   6  -6   0    2.79    0.20
  -6   6   0    2.61    0.28
   6   6   0    2.81    0.28
   6   6   0    2.83    0.21
   7  -6   0    1.10    0.22
  -7  -6   0    1.59    0.23
  -7  -6   0    1.51    0.20
   7   6   0    1.75    0.24
  -7   6   0    1.47    0.23
  -8  -6   0    2.92    0.29
  -8  -6   0    3.02    0.29
   8  -6   0    3.15    0.34
  -8   6   0    3.18    0.34
   8   6   0    2.77    0.31
   9  -6   0   -0.03    0.15
  -9  -6   0   -0.04    0.12
  -9  -6   0   -0.14    0.12
   9   6   0   -0.08    0.13
  -9   6   0    0.01    0.15
 -10  -6   0    0.31    0.18
  10  -6   0    0.50    0.20
  10   6   0    0.30    0.19
 -10   6   0    0.47    0.20
 -11  -6   0    0.82    0.23
  11  -6   0    0.63    0.23
 -11   6   0    1.01    0.25
  11   6   0    0.67    0.22
   0  -7   0   -0.10    0.09
   0   7   0    0.01    0.10
   0   7   0   -0.01    0.11
   1  -7   0    8.59    0.39
  -1  -7   0    7.98    0.38
   1  -7   0    8.29    0.38
  -1   7   0    8.08    0.38
   1   7   0    9.39    0.40
   1   7   0    7.97    0.36
  -1   7   0    8.66    0.39
  -2  -7   0   14.15    0.55
   2  -7   0   14.81    0.53
   2  -7   0   15.54    0.57
   2   7   0   15.25    0.55
  -2   7   0   16.57    0.59
  -2   7   0   14.80    0.54
   2   7   0   14.86    0.51
  -3  -7   0    0.50    0.15
   3  -7   0    0.80    0.18
   3  -7   0    0.68    0.14
   3   7   0    0.84    0.16
  -3   7   0    0.45    0.15
  -3   7   0    0.42    0.15
   3   7   0    0.83    0.18
   4  -7   0    4.76    0.28
  -4  -7   0    5.09    0.33
   4  -7   0    4.54    0.33
   4   7   0    4.70    0.31
  -4   7   0    5.75    0.34
  -4   7   0    5.21    0.34
   4   7   0    4.72    0.27
   5  -7   0   14.68    0.50
  -5  -7   0   14.82    0.57
   5  -7   0   14.49    0.60
  -5   7   0   14.78    0.60
   5   7   0   14.11    0.55
  -5   7   0   14.64    0.58
   5   7   0   13.97    0.49
   6  -7   0   23.55    0.81
  -6  -7   0   22.31    0.76
  -6   7   0   22.59    0.78
   6   7   0   22.91    0.76
   7  -7   0    0.32    0.18
  -7  -7   0    0.31    0.15
  -7   7   0    0.13    0.16
   7   7   0    0.22    0.15
  -8  -7   0   18.61    0.69
   8  -7   0   17.64    0.74
  -8   7   0   18.09    0.72
   8   7   0   17.91    0.70
   9  -7   0    0.03    0.17
  -9  -7   0    0.03    0.16
  -9   7   0   -0.09    0.16
   9   7   0   -0.10    0.15
  10  -7   0    1.63    0.31
 -10  -7   0    1.34    0.25
 -10   7   0    1.57    0.30
  10   7   0    1.51    0.28
   0  -8   0    0.47    0.16
   0  -8   0    0.15    0.14
   0   8   0    0.24    0.15
   0   8   0    0.34    0.14
   1  -8   0    0.00    0.11
  -1  -8   0    0.09    0.13
   1  -8   0   -0.02    0.15
  -1   8   0    0.17    0.14
  -1   8   0    0.07    0.15
   1   8   0    0.17    0.12
   1   8   0    0.03    0.11
   2  -8   0    0.08    0.13
   2  -8   0   -0.05    0.11
  -2  -8   0    0.10    0.13
   2   8   0    0.02    0.12
   2   8   0    0.01    0.13
  -2   8   0   -0.01    0.13
  -2   8   0    0.01    0.14
   3  -8   0    0.56    0.18
   3  -8   0    0.80    0.17
  -3  -8   0    1.06    0.21
   3   8   0    1.34    0.23
   3   8   0    0.96    0.18
  -3   8   0    0.93    0.20
  -3   8   0    0.88    0.20
   4  -8   0    4.12    0.28
  -4  -8   0    4.40    0.33
   4  -8   0    4.07    0.33
   4   8   0    3.84    0.31
  -4   8   0    3.75    0.31
   4   8   0    4.07    0.28
  -4   8   0    4.19    0.34
  -5  -8   0   13.89    0.58
   5  -8   0   12.59    0.59
   5  -8   0   13.77    0.52
   5   8   0   13.81    0.58
   5   8   0   12.52    0.49
  -5   8   0   12.86    0.57
  -6  -8   0    0.03    0.14
   6  -8   0   -0.13    0.15
  -6   8   0   -0.08    0.14
   6   8   0   -0.10    0.13
   7  -8   0    0.21    0.20
  -7  -8   0    0.00    0.16
  -7   8   0   -0.09    0.14
   7   8   0    0.15    0.16
   8  -8   0    4.42    0.45
  -8  -8   0    5.37    0.42
   8   8   0    5.33    0.40
  -8   8   0    5.52    0.42
  -9  -8   0    2.35    0.32
   9  -8   0    2.30    0.38
   9   8   0    2.19    0.32
  -9   8   0    2.27    0.34
   0  -9   0   -0.03    0.13
   0  -9   0    0.03    0.13
   0   9   0    0.04    0.14
   0   9   0   -0.04    0.13
   1  -9   0    7.82    0.43
  -1  -9   0    7.42    0.42
  -1  -9   0    6.93    0.42
   1  -9   0    7.44    0.43
   1   9   0    7.23    0.42
  -1   9   0    6.57    0.40
   1   9   0    6.96    0.41
  -1   9   0    7.44    0.43
  -2  -9   0    0.01    0.14
   2  -9   0    0.12    0.14
   2  -9   0    0.03    0.17
   2   9   0    0.18    0.15
  -2   9   0    0.25    0.18
  -2   9   0    0.10    0.15
   2   9   0    0.11    0.13
  -3  -9   0    9.43    0.50
   3  -9   0   11.59    0.55
   3  -9   0   10.06    0.48
   3   9   0    9.38    0.49
  -3   9   0   10.95    0.54
   3   9   0   10.29    0.47
  -4  -9   0    3.35    0.35
   4  -9   0    2.43    0.28
   4  -9   0    2.95    0.34
   4   9   0    3.21    0.30
  -4   9   0    2.79    0.33
   4   9   0    2.50    0.31
  -4   9   0    2.31    0.32
   5  -9   0    5.46    0.42
  -5  -9   0    6.06    0.41
   5  -9   0    5.39    0.39
  -5   9   0    4.57    0.37
   5   9   0    6.79    0.41
   6  -9   0    2.29    0.33
  -6  -9   0    2.59    0.33
   6   9   0    2.55    0.33
  -6   9   0    2.99    0.36
   7  -9   0    0.78    0.25
  -7  -9   0    0.36    0.20
   7   9   0    0.49    0.23
  -7   9   0    0.78    0.25
  -8  -9   0    0.48    0.22
   8  -9   0    0.45    0.24
  -8   9   0    0.49    0.22
   8   9   0    0.52    0.23
   0 -10   0    0.36    0.19
   0 -10   0    0.23    0.17
   0  10   0    0.24    0.17
   0  10   0    0.08    0.15
   1 -10   0    1.07    0.25
   1 -10   0    0.53    0.19
  -1 -10   0    0.50    0.21
  -1 -10   0    0.33    0.18
   1  10   0    0.46    0.18
   1  10   0    0.52    0.19
  -1  10   0    0.54    0.20
  -1  10   0    0.49    0.21
   2 -10   0    0.69    0.22
   2 -10   0    0.50    0.19
  -2 -10   0    0.97    0.23
  -2 -10   0    0.87    0.24
  -2  10   0    0.74    0.23
   2  10   0    0.71    0.21
   2  10   0    0.59    0.20
  -2  10   0    0.87    0.22
  -3 -10   0    0.05    0.16
   3 -10   0    0.23    0.18
   3 -10   0   -0.08    0.14
   3  10   0    0.09    0.16
  -3  10   0   -0.23    0.14
  -3  10   0    0.17    0.16
   3  10   0   -0.05    0.15
   4 -10   0    0.75    0.24
   4 -10   0    0.57    0.20
  -4 -10   0    0.86    0.23
   4  10   0    0.64    0.23
  -4  10   0    0.81    0.24
  -4  10   0    0.43    0.21
  -5 -10   0    0.03    0.17
   5 -10   0    0.07    0.18
   5  10   0    0.03    0.17
  -5  10   0    0.07    0.17
   6 -10   0   -0.09    0.18
  -6 -10   0    0.26    0.19
  -6  10   0    0.02    0.18
   6  10   0    0.25    0.19
   0 -11   0   -0.12    0.17
   0 -11   0   -0.11    0.17
   0  11   0    0.12    0.18
   0  11   0   -0.05    0.19
   1 -11   0    1.54    0.28
   1 -11   0    1.61    0.29
  -1 -11   0    1.27    0.26
  -1 -11   0    1.47    0.28
   1  11   0    1.26    0.27
   1  11   0    1.73    0.31
  -1  11   0    1.42    0.29
  -1  11   0    1.19    0.28
  -2 -11   0    0.48    0.21
  -2 -11   0    0.52    0.21
   2 -11   0    0.49    0.22
   2 -11   0    0.51    0.25
  -2  11   0    0.72    0.24
  -2  11   0    0.85    0.27
   2  11   0    0.81    0.22
   2  11   0    0.70    0.23
   3 -11   0    0.01    0.18
  -3 -11   0   -0.08    0.20
   3 -11   0    0.01    0.19
  -3  11   0    0.12    0.18
   3  11   0    0.08    0.20
  -3  11   0   -0.19    0.17
  13   0  -1    0.05    0.17
 -13   0   1   -0.02    0.17
 -12   0   1    0.01    0.16
  12   0  -1   -0.07    0.16
  11   0  -1    0.00    0.13
 -11   0   1    0.05    0.14
  10   0  -1    0.08    0.13
 -10   0   1    0.15    0.14
  10   0  -1    0.07    0.11
   9   0  -1    0.15    0.12
   9   0  -1    0.02    0.09
  -9   0   1    0.00    0.11
  -8   0   1   -0.01    0.10
   8   0  -1    0.18    0.09
   8   0  -1    0.05    0.10
   7   0  -1    0.10    0.07
  -7   0   1    0.01    0.05
   7   0  -1   -0.08    0.08
  -7   0   1    0.00    0.09
  -7   0   1    0.13    0.09
   6   0  -1    0.08    0.08
   6   0  -1   -0.02    0.06
  -6   0   1   -0.10    0.06
  -6   0   1   -0.01    0.04
  -6   0   1    0.04    0.07
   5   0  -1   -0.10    0.06
  -5   0   1    0.01    0.04
   5   0  -1    0.06    0.07
  -5   0   1    0.04    0.07
   4   0  -1    0.00    0.04
   4   0  -1   -0.01    0.05
  -4   0   1   -0.08    0.05
  -4   0   1   -0.05    0.04
  -4   0   1    0.04    0.04
   3   0  -1   -0.05    0.04
  -3   0   1   -0.08    0.03
  -3   0   1   -0.03    0.04
   3   0  -1   -0.09    0.03
  -3   0   1   -0.07    0.04
  -2   0   1   -0.27    0.04
   2   0  -1   -0.13    0.03
   2   0  -1   -0.07    0.04
  -1   0   1   -0.20    0.02
  -1   0   1   -0.15    0.02
   1   0  -1   -0.15    0.01
   1   0  -1   -0.17    0.02
   1   0  -1   -0.14    0.01
  -1   0   1   -0.15    0.01
  -1   0   1   -0.16    0.01
  -1   0  -1    0.01    0.01
   1   0   1   -0.01    0.02
   1   0   1   -0.01    0.01
  -1   0  -1   -0.03    0.02
  -1   0  -1    0.03    0.02
   2   0   1    0.00    0.04
  -2   0  -1    0.02    0.04
   2   0   1   -0.04    0.03
  -2   0  -1   -0.01    0.02
  -2   0  -1    0.00    0.04
  -3   0  -1   -0.06    0.04
  -3   0  -1    0.05    0.05
   3   0   1    0.03    0.04
   3   0   1    0.09    0.05
  -3   0  -1   -0.04    0.02
  -4   0  -1   -0.01    0.03
  -4   0  -1    0.01    0.05
  -4   0  -1   -0.03    0.05
   4   0   1   -0.03    0.04
   4   0   1   -0.02    0.05
   5   0   1   -0.03    0.06
  -5   0  -1    0.04    0.03
   5   0   1    0.01    0.06
  -5   0  -1    0.03    0.07
  -5   0  -1    0.03    0.07
  -6   0  -1   -0.05    0.07
  -6   0  -1   -0.02    0.03
   6   0   1    0.00    0.06
  -6   0  -1   -0.03    0.07
   6   0   1    0.00    0.07
  -7   0  -1    0.01    0.08
   7   0   1    0.14    0.09
  -7   0  -1    0.11    0.04
  -7   0  -1    0.03    0.09
   7   0   1    0.08    0.08
   8   0   1   -0.01    0.09
   8   0   1   -0.01    0.10
  -8   0  -1   -0.12    0.08
   9   0   1    0.00    0.10
   9   0   1    0.10    0.12
  -9   0  -1    0.15    0.13
  10   0   1    0.01    0.13
 -10   0  -1   -0.03    0.11
  10   0   1   -0.01    0.11
  11   0   1    0.03    0.12
  11   0   1    0.14    0.15
 -11   0  -1    0.13    0.14
 -12   0  -1   -0.09    0.15
  12   0   1    0.03    0.16
 -13   0  -1   -0.29    0.14
  13   0   1   -0.02    0.17
 -13  -1   1   -0.21    0.15
  13  -1  -1    0.14    0.18
  13   1  -1   -0.19    0.16
 -13   1   1   -0.06    0.15
  12  -1  -1   13.87    0.64
 -12  -1   1   13.59    0.63
  12   1  -1   15.12    0.65
 -12   1   1   13.93    0.64
 -11  -1   1    2.67    0.31
  11  -1  -1    2.98    0.33
  11  -1  -1    3.19    0.30
 -11   1   1    3.03    0.33
  11   1  -1    2.65    0.31
  10  -1  -1    9.63    0.42
 -10  -1   1    9.63    0.46
  10  -1  -1    9.81    0.47
  10   1  -1    8.61    0.45
 -10   1   1   10.33    0.49
 -10   1   1    8.87    0.44
  -9  -1   1    7.97    0.39
   9  -1  -1    7.22    0.38
   9  -1  -1    7.35    0.35
  -9   1   1    7.92    0.40
   9   1  -1    7.51    0.32
  -9   1   1    7.94    0.39
   9   1  -1    7.70    0.39
  -8  -1   1   13.50    0.39
  -8  -1   1   13.74    0.50
   8  -1  -1   12.60    0.46
   8  -1  -1   13.37    0.51
  -8   1   1   14.19    0.50
  -8   1   1   12.91    0.50
   8   1  -1   14.16    0.44
   8   1  -1   14.43    0.51
   7  -1  -1   12.64    0.46
  -7  -1   1   13.53    0.37
   7  -1  -1   12.59    0.42
  -7  -1   1   12.46    0.46
  -7   1   1   12.38    0.46
   7   1  -1   13.44    0.47
  -7   1   1   13.35    0.33
  -7   1   1   12.64    0.45
   7   1  -1   13.89    0.41
   6  -1  -1    7.41    0.31
  -6  -1   1    6.83    0.24
  -6  -1   1    7.25    0.30
   6  -1  -1    6.85    0.28
   6   1  -1    6.98    0.30
   6   1  -1    7.10    0.25
  -6   1   1    7.42    0.20
  -6   1   1    7.29    0.31
  -6   1   1    7.14    0.30
  -5  -1   1   96.44    1.98
  -5  -1   1   95.08    2.05
   5  -1  -1   96.73    2.06
   5  -1  -1   95.80    2.02
   5   1  -1   95.71    2.05
  -5   1   1   98.03    1.93
  -5   1   1   92.21    2.03
  -5   1   1   97.45    2.06
   5   1  -1   95.54    1.98
   4  -1  -1    0.09    0.06
  -4  -1   1   -0.10    0.04
  -4  -1   1   -0.05    0.05
  -4   1   1   -0.08    0.05
  -4   1   1   -0.01    0.03
   4   1  -1   -0.03    0.06
   4   1  -1   -0.09    0.04
  -4   1   1   -0.11    0.05
   3  -1  -1  257.11    5.21
  -3  -1   1  273.06    5.23
  -3  -1   1  260.95    5.19
  -3   1   1  260.26    5.24
   3   1  -1  255.66    5.24
  -3   1   1  260.84    5.21
  -3   1   1  265.22    5.23
   3   1  -1  262.97    5.22
   2  -1  -1   31.72    0.70
  -2  -1   1   31.18    0.68
  -2  -1   1   31.48    0.69
   2   1  -1   31.99    0.70
  -2   1   1   31.88    0.70
   2   1  -1   32.71    0.66
  -2   1   1   31.95    0.69
  -2   1   1   31.87    0.70
  -2   1   1   32.13    0.66
  -1  -1   1  576.96   11.46
  -1  -1   1  582.51   11.40
  -1  -1   1  574.33   11.54
  -1   1   1  577.52   11.57
  -1   1   1  586.85   11.41
   1   1  -1  593.66   11.58
   1   1  -1  577.36   11.41
  -1   1   1  557.72   11.44
  -1   1   1  561.88   11.47
   0  -1  -1  138.63    2.83
   0  -1   1  141.70    2.82
   0  -1   1  142.22    2.82
   0  -1  -1  136.80    2.82
   0   1   1  140.89    2.82
   0   1  -1  140.19    2.82
   0   1  -1  145.10    2.82
   0   1  -1  142.08    2.83
   0   1   1  143.28    2.84
   0   1   1  141.25    2.83
   0   1  -1  140.54    2.84
  -1  -1  -1  150.31    3.03
   1  -1   1  153.00    3.04
  -1  -1  -1  152.26    3.02
   1  -1   1  153.10    3.04
  -1   1  -1  150.45    3.08
   1   1   1  155.04    3.03
  -1   1  -1  152.44    3.01
  -1   1  -1  152.30    3.03
   1   1   1  152.87    3.02
  -1   1  -1  153.74    3.04
   2  -1   1   46.04    0.91
  -2  -1  -1   45.38    0.96
   2  -1   1   45.81    0.91
  -2  -1  -1   45.29    0.95
   2  -1   1   44.17    0.97
   2   1   1   45.56    0.96
   2   1   1   46.04    0.95
  -2   1  -1   45.56    0.96
  -2   1  -1   45.36    0.97
  -3  -1  -1   10.06    0.30
   3  -1   1   10.34    0.22
  -3  -1  -1   10.11    0.27
   3  -1   1   10.12    0.30
   3  -1   1   10.28    0.22
   3   1   1    9.77    0.27
  -3   1  -1   10.17    0.30
   3   1   1    9.67    0.29
  -3   1  -1    9.96    0.29
  -3   1  -1    9.95    0.22
  -4  -1  -1   44.28    0.99
   4  -1   1   43.80    0.88
  -4  -1  -1   42.28    0.93
   4  -1   1   44.66    0.99
   4   1   1   42.64    0.99
   4   1   1   43.13    0.95
  -4   1  -1   43.05    0.88
  -4   1  -1   42.96    0.98
  -4   1  -1   43.52    1.00
  -5  -1  -1    2.27    0.16
   5  -1   1    2.18    0.15
  -5  -1  -1    2.42    0.12
   5   1   1    2.20    0.13
   5   1   1    1.92    0.15
  -5   1  -1    2.49    0.16
  -5   1  -1    2.22    0.16
  -5   1  -1    2.19    0.08
   6  -1   1   67.48    1.54
  -6  -1  -1   66.82    1.53
  -6  -1  -1   68.71    1.43
   6  -1   1   67.77    1.51
   6   1   1   66.15    1.53
  -6   1  -1   67.21    1.36
  -6   1  -1   69.08    1.54
  -6   1  -1   67.11    1.54
   6   1   1   68.06    1.48
   7  -1   1   19.55    0.61
   7  -1   1   18.57    0.57
  -7  -1  -1   19.53    0.48
  -7  -1  -1   19.96    0.61
   7   1   1   18.67    0.59
   7   1   1   18.66    0.54
  -7   1  -1   18.29    0.58
  -7   1  -1   19.57    0.61
   8  -1   1   40.54    1.07
   8  -1   1   40.12    1.02
  -8  -1  -1   39.90    1.06
  -8   1  -1   39.89    1.05
   8   1   1   39.15    1.05
   8   1   1   41.18    0.99
  -8   1  -1   38.60    1.06
  -9  -1  -1    1.56    0.22
   9  -1   1    1.33    0.21
   9  -1   1    1.54    0.21
  -9   1  -1    1.61    0.22
   9   1   1    2.15    0.21
  -9   1  -1    1.77    0.23
   9   1   1    1.51    0.22
  10  -1   1    2.35    0.26
  10  -1   1    2.00    0.27
 -10  -1  -1    1.65    0.24
  10   1   1    2.35    0.23
 -10   1  -1    2.00    0.26
 -10   1  -1    1.64    0.24
  10   1   1    1.94    0.26
 -11  -1  -1    3.94    0.33
  11  -1   1    3.74    0.30
  11  -1   1    3.98    0.38
 -11   1  -1    4.21    0.34
  11   1   1    4.20    0.34
 -12  -1  -1    0.29    0.18
  12  -1   1    0.34    0.18
 -12   1  -1    0.39    0.19
  12   1   1    0.30    0.19
  13  -1   1    7.06    0.48
 -13  -1  -1    6.69    0.47
  13   1   1    6.88    0.47
 -13   1  -1    6.62    0.46
 -13  -2   1    0.18    0.18
  13  -2  -1    0.33    0.20
 -13   2   1    0.30    0.21
  13   2  -1    0.43    0.21
  12  -2  -1    0.20    0.16
 -12  -2   1    0.15    0.17
 -12   2   1    0.10    0.17
  12   2  -1    0.13    0.17
 -12   2   1    0.11    0.17
  11  -2  -1   -0.11    0.13
  11  -2  -1   -0.02    0.14
 -11  -2   1    0.16    0.15
 -11   2   1   -0.14    0.13
  11   2  -1    0.13    0.16
 -11   2   1    0.20    0.17
  10  -2  -1    0.98    0.20
 -10  -2   1    1.28    0.22
  10  -2  -1    1.27    0.21
 -10   2   1    1.09    0.22
 -10   2   1    1.26    0.21
  10   2  -1    0.99    0.20
   9  -2  -1    2.92    0.29
  -9  -2   1    3.24    0.26
   9  -2  -1    2.58    0.25
  -9   2   1    3.40    0.28
  -9   2   1    3.54    0.27
   9   2  -1    3.34    0.21
   9   2  -1    2.70    0.28
  -8  -2   1    9.91    0.34
  -8  -2   1    9.67    0.42
   8  -2  -1    9.44    0.40
   8  -2  -1   10.34    0.44
   8   2  -1    9.79    0.42
   8   2  -1    9.56    0.34
  -8   2   1    9.77    0.43
  -8   2   1    9.90    0.42
   7  -2  -1    0.32    0.06
  -7  -2   1    0.25    0.08
   7  -2  -1    0.38    0.12
   7  -2  -1    0.31    0.11
  -7  -2   1    0.16    0.10
  -7   2   1    0.29    0.11
  -7   2   1    0.32    0.05
  -7   2   1    0.26    0.11
   7   2  -1    0.27    0.11
   7   2  -1    0.18    0.07
  -6  -2   1   -0.05    0.06
   6  -2  -1    0.05    0.07
   6  -2  -1   -0.04    0.04
  -6  -2   1    0.01    0.08
   6   2  -1    0.00    0.07
   6   2  -1    0.12    0.06
  -6   2   1   -0.01    0.07
  -6   2   1    0.00    0.04
  -6   2   1    0.06    0.08
   5  -2  -1    6.83    0.20
   5  -2  -1    6.96    0.28
  -5  -2   1    6.46    0.27
  -5  -2   1    6.89    0.25
  -5   2   1    7.45    0.28
  -5   2   1    7.22    0.29
   5   2  -1    7.07    0.28
  -5   2   1    7.04    0.20
   5   2  -1    7.08    0.23
  -4  -2   1  143.26    2.99
   4  -2  -1  145.61    2.94
  -4  -2   1  146.42    3.02
   4  -2  -1  150.47    3.03
   4   2  -1  147.56    2.96
   4   2  -1  145.85    3.03
  -4   2   1  146.09    3.04
  -4   2   1  147.64    2.94
  -4   2   1  151.18    3.00
  -3  -2   1    1.46    0.10
   3  -2  -1    1.54    0.12
  -3  -2   1    1.38    0.10
   3  -2  -1    1.50    0.09
   3   2  -1    1.35    0.08
  -3   2   1    1.68    0.13
  -3   2   1    1.57    0.12
  -3   2   1    1.41    0.10
   3   2  -1    1.48    0.11
   2  -2  -1  364.86    7.13
   2  -2  -1  357.71    7.09
  -2  -2   1  356.06    7.12
  -2  -2   1  361.51    7.16
  -2   2   1  360.51    7.08
  -2   2   1  359.68    7.13
   2   2  -1  364.83    7.22
  -2   2   1  358.75    7.20
   2   2  -1  354.31    7.12
   1  -2  -1    5.68    0.18
   1  -2  -1    5.45    0.13
  -1  -2   1    5.50    0.15
  -1  -2   1    5.50    0.19
   1   2  -1    5.58    0.18
  -1   2   1    5.54    0.18
  -1   2   1    5.56    0.13
  -1   2   1    5.80    0.19
   1   2  -1    5.65    0.17
   0  -2  -1  293.58    5.74
   0  -2  -1  296.41    5.77
   0  -2   1  288.57    5.76
   0   2  -1  288.49    5.77
   0   2   1  293.35    5.74
   0   2  -1  287.59    5.76
   0   2   1  287.70    5.76
   0   2  -1  297.82    5.74
   0   2  -1  295.50    5.74
   0   2   1  283.82    5.76
   1  -2   1   17.36    0.41
  -1  -2  -1   17.07    0.38
   1  -2   1   18.33    0.38
  -1  -2  -1   17.21    0.42
   1  -2   1   17.59    0.43
   1   2   1   16.20    0.40
  -1   2  -1   17.31    0.37
  -1   2  -1   17.37    0.42
  -1   2  -1   17.17    0.42
   1   2   1   16.31    0.41
  -2  -2  -1  160.45    3.25
   2  -2   1  163.22    3.27
  -2  -2  -1  159.87    3.22
   2  -2   1  162.04    3.21
   2   2   1  161.91    3.23
  -2   2  -1  160.89    3.21
  -2   2  -1  166.42    3.27
   2   2   1  160.40    3.25
  -2   2  -1  156.30    3.25
   3  -2   1   72.42    1.44
  -3  -2  -1   71.78    1.50
  -3  -2  -1   70.71    1.50
   3  -2   1   69.87    1.52
   3   2   1   69.95    1.51
  -3   2  -1   70.37    1.52
   3   2   1   70.96    1.48
  -3   2  -1   71.23    1.48
   4  -2   1   42.13    0.87
  -4  -2  -1   41.70    0.93
  -4  -2  -1   42.63    0.96
   4  -2   1   41.17    0.97
  -4   2  -1   42.73    0.95
  -4   2  -1   41.13    0.98
   4   2   1   41.47    0.92
   4   2   1   40.26    0.96
  -5  -2  -1    3.93    0.18
   5  -2   1    3.79    0.12
  -5  -2  -1    4.03    0.21
   5  -2   1    3.76    0.21
  -5   2  -1    3.92    0.21
   5   2   1    3.82    0.20
  -5   2  -1    3.82    0.20
   5   2   1    4.04    0.18
   6  -2   1    0.26    0.04
   6  -2   1    0.20    0.09
  -6  -2  -1    0.14    0.09
  -6  -2  -1    0.46    0.09
   6   2   1    0.28    0.08
  -6   2  -1    0.23    0.10
   6   2   1    0.19    0.10
  -6   2  -1    0.22    0.09
  -7  -2  -1    0.77    0.14
   7  -2   1    0.88    0.15
  -7  -2  -1    0.76    0.11
   7   2   1    1.02    0.16
   7   2   1    1.27    0.14
  -7   2  -1    0.95    0.16
  -7   2  -1    0.98    0.16
  -8  -2  -1    0.77    0.12
   8  -2   1    1.02    0.18
  -8  -2  -1    1.10    0.18
   8  -2   1    1.10    0.18
   8   2   1    0.98    0.17
  -8   2  -1    0.84    0.17
   8   2   1    1.00    0.14
  -8   2  -1    1.04    0.18
   9  -2   1    1.25    0.21
   9  -2   1    1.43    0.21
  -9  -2  -1    1.71    0.23
   9   2   1    1.52    0.21
   9   2   1    1.46    0.17
  -9   2  -1    1.04    0.19
  -9   2  -1    1.34    0.20
  10  -2   1    0.32    0.15
 -10  -2  -1    0.12    0.14
  10  -2   1    0.40    0.16
  10   2   1    0.27    0.15
 -10   2  -1    0.21    0.13
 -10   2  -1    0.11    0.14
 -11  -2  -1    0.61    0.19
  11  -2   1    0.27    0.15
  11  -2   1    0.43    0.18
 -11   2  -1    0.27    0.16
 -11   2  -1    0.06    0.15
  11   2   1    0.10    0.15
  12  -2   1    0.31    0.19
 -12  -2  -1    0.25    0.18
  12  -2   1    0.52    0.19
 -12   2  -1    0.33    0.20
 -12   2  -1    0.45    0.19
  12   2   1    0.51    0.20
 -13  -2  -1    0.15    0.20
  13  -2   1    0.26    0.20
 -13   2  -1    0.26    0.20
  13   2   1    0.43    0.22
  13  -3  -1    0.74    0.24
 -13  -3   1    1.19    0.27
 -13   3   1    0.91    0.25
 -13   3   1    0.82    0.25
  13   3  -1    0.59    0.23
  12  -3  -1    3.22    0.37
 -12  -3   1    2.79    0.35
  12  -3  -1    2.93    0.33
 -12   3   1    3.61    0.37
  12   3  -1    2.49    0.33
 -12   3   1    3.03    0.37
  11  -3  -1    2.28    0.28
  11  -3  -1    2.27    0.30
 -11  -3   1    2.06    0.28
  11   3  -1    1.95    0.28
 -11   3   1    2.43    0.32
 -11   3   1    2.18    0.29
  10  -3  -1    1.40    0.24
  10  -3  -1    1.38    0.22
 -10  -3   1    1.31    0.22
  10   3  -1    1.54    0.24
 -10   3   1    1.11    0.22
 -10   3   1    0.75    0.18
   9  -3  -1    7.43    0.38
  -9  -3   1    7.51    0.38
   9  -3  -1    7.22    0.39
  -9  -3   1    7.31    0.32
  -9   3   1    7.39    0.37
   9   3  -1    7.17    0.39
  -9   3   1    7.55    0.40
   8  -3  -1   19.38    0.64
  -8  -3   1   21.08    0.66
  -8  -3   1   20.18    0.58
   8   3  -1   20.13    0.66
   8   3  -1   19.25    0.55
  -8   3   1   19.83    0.63
  -8   3   1   20.07    0.67
  -7  -3   1   17.29    0.52
  -7  -3   1   17.88    0.57
   7  -3  -1   17.53    0.43
   7  -3  -1   16.74    0.57
   7   3  -1   17.43    0.58
   7   3  -1   17.87    0.48
  -7   3   1   18.11    0.60
  -7   3   1   17.30    0.54
   6  -3  -1   37.50    0.83
  -6  -3   1   37.00    0.91
  -6  -3   1   38.20    0.95
   6  -3  -1   37.61    0.97
  -6   3   1   37.47    0.92
  -6   3   1   39.37    0.99
   6   3  -1   36.11    0.96
   6   3  -1   38.71    0.87
   5  -3  -1    0.76    0.13
  -5  -3   1    0.77    0.11
  -5  -3   1    0.73    0.12
   5  -3  -1    0.98    0.09
   5   3  -1    0.70    0.12
  -5   3   1    0.70    0.10
   5   3  -1    0.99    0.10
  -5   3   1    0.81    0.13
  -4  -3   1   26.58    0.66
  -4  -3   1   27.13    0.68
   4  -3  -1   27.47    0.71
   4  -3  -1   26.64    0.62
  -4   3   1   27.16    0.70
   4   3  -1   25.98    0.62
   4   3  -1   26.83    0.69
  -4   3   1   25.04    0.69
  -4   3   1   27.62    0.64
   3  -3  -1  117.38    2.36
  -3  -3   1  112.95    2.40
  -3  -3   1  115.74    2.36
   3  -3  -1  118.52    2.43
   3   3  -1  117.66    2.41
  -3   3   1  115.15    2.43
  -3   3   1  115.44    2.34
   3   3  -1  111.61    2.35
  -3   3   1  114.51    2.41
  -2  -3   1   -0.04    0.05
   2  -3  -1    0.02    0.05
   2  -3  -1   -0.05    0.06
  -2  -3   1    0.05    0.05
  -2   3   1   -0.01    0.03
   2   3  -1    0.03    0.06
  -2   3   1    0.07    0.06
  -2   3   1    0.00    0.06
   2   3  -1    0.02    0.04
   1  -3  -1    0.06    0.02
  -1  -3   1   -0.02    0.05
  -1  -3   1   -0.01    0.02
   1  -3  -1    0.05    0.05
   1  -3  -1    0.03    0.01
   1   3  -1    0.04    0.05
  -1   3   1   -0.06    0.05
  -1   3   1    0.06    0.05
  -1   3   1    0.02    0.01
   1   3  -1    0.07    0.05
   0  -3  -1    0.03    0.05
   0  -3   1    0.19    0.06
   0   3  -1    0.20    0.06
   0   3   1    0.16    0.06
   0   3  -1    0.12    0.05
   0   3   1    0.14    0.05
  -1  -3  -1   33.90    0.71
   1  -3   1   34.49    0.69
  -1  -3  -1   33.14    0.79
   1  -3   1   33.72    0.79
   1  -3   1   34.42    0.77
  -1   3  -1   33.71    0.79
  -1   3  -1   33.80    0.79
  -1   3  -1   34.01    0.69
   1   3   1   34.03    0.78
   1   3   1   34.36    0.77
   2  -3   1   35.03    0.83
   2  -3   1   35.09    0.79
  -2  -3  -1   34.68    0.76
  -2  -3  -1   36.41    0.83
  -2   3  -1   35.42    0.75
  -2   3  -1   34.89    0.83
   2   3   1   35.08    0.79
  -2   3  -1   34.44    0.82
   2   3   1   34.84    0.81
   3  -3   1   94.86    1.94
  -3  -3  -1   96.10    1.96
  -3  -3  -1   93.22    1.99
   3  -3   1   96.28    2.02
   3   3   1   93.96    1.96
  -3   3  -1   93.59    1.94
   3   3   1   94.56    1.99
  -3   3  -1   91.78    2.01
  -3   3  -1   95.49    2.02
  -4  -3  -1    5.94    0.24
   4  -3   1    5.84    0.19
  -4  -3  -1    6.21    0.24
   4  -3   1    6.41    0.27
   4   3   1    5.59    0.25
   4   3   1    5.86    0.22
  -4   3  -1    5.68    0.22
  -4   3  -1    5.72    0.26
  -5  -3  -1   23.44    0.62
   5  -3   1   23.36    0.66
   5  -3   1   23.57    0.54
  -5  -3  -1   23.38    0.63
   5   3   1   22.95    0.64
  -5   3  -1   23.75    0.66
  -5   3  -1   22.77    0.61
   5   3   1   23.97    0.59
  -6  -3  -1   11.37    0.41
   6  -3   1   11.67    0.30
   6  -3   1   11.84    0.43
  -6  -3  -1   11.68    0.39
   6   3   1   12.13    0.37
   6   3   1   12.15    0.43
  -6   3  -1   11.89    0.40
  -6   3  -1   11.80    0.44
  -7  -3  -1    2.75    0.19
  -7  -3  -1    3.08    0.23
   7  -3   1    3.22    0.24
   7   3   1    3.23    0.19
  -7   3  -1    3.18    0.24
  -7   3  -1    3.08    0.22
   7   3   1    3.35    0.24
  -8  -3  -1    0.39    0.14
  -8  -3  -1    0.29    0.10
   8  -3   1    0.72    0.16
   8   3   1    0.50    0.11
   8   3   1    0.23    0.13
  -8   3  -1    0.20    0.12
  -8   3  -1    0.70    0.16
   9  -3   1    0.15    0.13
   9  -3   1    0.01    0.12
  -9  -3  -1   -0.04    0.11
  -9   3  -1    0.00    0.12
  -9   3  -1   -0.08    0.10
   9   3   1    0.03    0.12
  10  -3   1    5.27    0.35
 -10  -3  -1    5.44    0.36
  10  -3   1    5.27    0.37
 -10   3  -1    4.13    0.34
 -10   3  -1    6.24    0.37
  10   3   1    5.62    0.36
 -11  -3  -1    1.53    0.25
  11  -3   1    1.40    0.25
  11  -3   1    1.37    0.23
  11   3   1    1.07    0.23
 -11   3  -1    1.17    0.22
 -11   3  -1    1.08    0.24
  12  -3   1    3.32    0.36
 -12  -3  -1    2.84    0.34
  12  -3   1    3.20    0.37
 -12   3  -1    2.50    0.34
  12   3   1    2.12    0.32
 -12   3  -1    3.01    0.34
 -13  -3  -1    0.44    0.24
  13  -3   1    0.08    0.18
  13   3   1    0.29    0.21
 -13   3  -1    0.14    0.18
 -13   3  -1    0.23    0.21
 -12  -4   1    1.32    0.27
  12  -4  -1    0.67    0.22
  12  -4  -1    0.99    0.24
  12   4  -1    0.82    0.25
 -12   4   1    1.43    0.26
 -12   4   1    1.19    0.27
 -11  -4   1    0.71    0.20
  11  -4  -1    0.68    0.21
  11  -4  -1    0.43    0.18
 -11   4   1    0.42    0.20
  11   4  -1    0.52    0.19
 -11   4   1    0.76    0.19
  10  -4  -1    0.74    0.20
 -10  -4   1    0.74    0.19
  10  -4  -1    0.85    0.21
 -10   4   1    0.81    0.19
  10   4  -1    0.64    0.19
 -10   4   1    0.71    0.20
  -9  -4   1    0.33    0.13
   9  -4  -1    0.12    0.15
  -9  -4   1    0.11    0.13
   9   4  -1    0.28    0.15
  -9   4   1    0.35    0.13
  -9   4   1    0.44    0.16
   8  -4  -1    1.19    0.20
  -8  -4   1    1.15    0.18
  -8  -4   1    1.35    0.19
  -8   4   1    1.50    0.20
  -8   4   1    1.28    0.21
   8   4  -1    1.67    0.23
  -7  -4   1    8.89    0.37
  -7  -4   1    9.00    0.37
   7  -4  -1    8.39    0.41
   7   4  -1    9.30    0.31
   7   4  -1    8.71    0.39
  -7   4   1    8.10    0.39
  -7   4   1    8.84    0.36
   6  -4  -1   44.57    1.02
  -6  -4   1   45.69    1.10
   6  -4  -1   45.84    1.16
  -6  -4   1   46.18    1.11
   6   4  -1   45.10    1.14
   6   4  -1   45.40    1.03
  -6   4   1   45.85    1.07
  -6   4   1   44.55    1.15
  -5  -4   1    2.21    0.17
   5  -4  -1    2.32    0.15
   5  -4  -1    2.41    0.23
  -5  -4   1    2.44    0.18
  -5   4   1    2.35    0.19
   5   4  -1    2.21    0.18
  -5   4   1    2.40    0.15
   5   4  -1    2.59    0.15
   4  -4  -1   33.83    0.89
  -4  -4   1   34.07    0.87
  -4  -4   1   35.16    0.82
   4  -4  -1   34.98    0.81
  -4   4   1   33.49    0.87
   4   4  -1   34.55    0.87
  -4   4   1   35.18    0.90
  -4   4   1   35.74    0.79
   4   4  -1   33.24    0.80
  -3  -4   1    4.50    0.22
   3  -4  -1    4.13    0.19
  -3  -4   1    4.00    0.17
   3  -4  -1    4.35    0.23
   3   4  -1    3.90    0.18
  -3   4   1    4.62    0.24
   3   4  -1    4.11    0.21
  -3   4   1    4.44    0.15
  -3   4   1    3.87    0.21
  -2  -4   1   39.61    0.87
  -2  -4   1   39.83    0.97
   2  -4  -1   40.57    0.98
   2  -4  -1   40.51    0.94
  -2   4   1   40.53    0.97
   2   4  -1   40.90    0.92
   2   4  -1   40.37    0.95
  -2   4   1   40.80    0.83
  -2   4   1   40.98    0.97
  -1  -4   1    8.57    0.21
   1  -4  -1    9.04    0.30
  -1  -4   1    8.36    0.31
   1   4  -1    8.42    0.30
   1   4  -1    8.52    0.29
  -1   4   1    9.13    0.32
  -1   4   1    8.12    0.30
   0  -4  -1    0.52    0.10
   0  -4   1    0.59    0.10
   0   4  -1    0.54    0.10
   0   4   1    0.40    0.08
   0   4   1    0.39    0.09
   0   4  -1    0.61    0.10
  -1  -4  -1   63.00    1.39
   1  -4   1   61.99    1.39
  -1  -4  -1   62.54    1.26
   1  -4   1   64.01    1.37
  -1   4  -1   62.11    1.39
   1   4   1   61.84    1.37
   1   4   1   62.15    1.36
  -1   4  -1   60.32    1.38
  -2  -4  -1   41.56    1.01
  -2  -4  -1   42.45    0.91
   2  -4   1   43.45    0.98
   2  -4   1   43.24    1.03
  -2   4  -1   43.46    1.02
   2   4   1   42.17    0.99
  -2   4  -1   42.36    0.88
   2   4   1   42.14    0.97
  -2   4  -1   44.22    1.03
   3  -4   1    6.13    0.27
   3  -4   1    6.28    0.23
  -3  -4  -1    5.26    0.25
  -3  -4  -1    5.71    0.21
  -3   4  -1    6.22    0.28
   3   4   1    5.52    0.23
   3   4   1    5.54    0.25
  -3   4  -1    6.24    0.27
  -3   4  -1    5.82    0.19
  -4  -4  -1   15.23    0.47
  -4  -4  -1   15.39    0.44
   4  -4   1   14.70    0.41
   4  -4   1   15.22    0.50
  -4   4  -1   14.65    0.48
   4   4   1   14.26    0.46
   4   4   1   15.87    0.43
  -4   4  -1   15.48    0.41
  -5  -4  -1    2.34    0.18
   5  -4   1    2.69    0.21
   5  -4   1    2.64    0.14
  -5  -4  -1    2.79    0.19
   5   4   1    2.55    0.20
   5   4   1    2.38    0.16
  -5   4  -1    2.30    0.19
  -5   4  -1    2.60    0.16
  -6  -4  -1    2.22    0.21
   6  -4   1    1.98    0.13
  -6  -4  -1    2.53    0.20
   6  -4   1    2.41    0.24
  -6   4  -1    2.19    0.18
   6   4   1    2.17    0.16
  -6   4  -1    1.88    0.21
   6   4   1    2.01    0.21
  -7  -4  -1    0.02    0.09
   7  -4   1    0.07    0.11
  -7  -4  -1   -0.01    0.09
  -7   4  -1    0.01    0.09
   7   4   1   -0.05    0.07
  -7   4  -1    0.11    0.12
   7   4   1    0.08    0.10
  -8  -4  -1    3.32    0.25
  -8  -4  -1    3.31    0.23
   8  -4   1    3.15    0.27
  -8   4  -1    2.94    0.29
   8   4   1    2.99    0.25
   8   4   1    3.04    0.20
  -8   4  -1    3.57    0.25
  -9  -4  -1    0.09    0.10
   9  -4   1    0.11    0.15
  -9  -4  -1    0.00    0.13
   9   4   1    0.08    0.12
  -9   4  -1    0.20    0.14
  -9   4  -1    0.05    0.13
 -10  -4  -1    4.78    0.34
  10  -4   1    4.28    0.35
  10  -4   1    4.52    0.34
 -10   4  -1    3.66    0.37
  10   4   1    4.45    0.34
 -10   4  -1    4.67    0.33
  11  -4   1    1.36    0.26
  11  -4   1    1.43    0.25
 -11  -4  -1    1.39    0.25
 -11   4  -1    1.25    0.26
  11   4   1    1.43    0.26
 -11   4  -1    1.30    0.24
 -12  -4  -1    2.57    0.34
  12  -4   1    2.39    0.34
  12  -4   1    2.31    0.31
  12   4   1    2.37    0.33
 -12   4  -1    1.60    0.30
 -12   4  -1    2.74    0.34
  12  -5  -1    0.27    0.20
  12  -5  -1    0.06    0.17
 -12  -5   1    0.31    0.19
 -12   5   1    0.16    0.19
  12   5  -1    0.31    0.22
 -11  -5   1    0.34    0.18
  11  -5  -1    0.28    0.19
  11  -5  -1    0.59    0.21
 -11   5   1    0.45    0.20
  11   5  -1    0.09    0.16
 -11   5   1    0.23    0.16
 -10  -5   1    2.33    0.29
  10  -5  -1    2.24    0.30
 -10   5   1    2.76    0.29
  10   5  -1    2.75    0.32
 -10   5   1    2.87    0.34
  -9  -5   1    0.21    0.13
  -9  -5   1    0.07    0.13
   9  -5  -1    0.02    0.15
  -9   5   1    0.20    0.15
  -9   5   1    0.32    0.14
   9   5  -1    0.19    0.15
   8  -5  -1    1.14    0.21
  -8  -5   1    1.18    0.18
  -8  -5   1    1.22    0.20
  -8   5   1    1.10    0.21
   8   5  -1    1.36    0.22
  -8   5   1    1.65    0.20
  -7  -5   1    2.50    0.24
  -7  -5   1    2.37    0.23
   7  -5  -1    2.39    0.27
   7   5  -1    2.48    0.26
  -7   5   1    2.69    0.28
  -7   5   1    2.76    0.21
   7   5  -1    2.65    0.21
   6  -5  -1    3.15    0.26
  -6  -5   1    3.13    0.24
  -6  -5   1    3.00    0.22
   6  -5  -1    3.10    0.19
   6   5  -1    3.23    0.25
   6   5  -1    3.17    0.19
  -6   5   1    2.92    0.19
  -6   5   1    3.40    0.26
   5  -5  -1    4.22    0.21
  -5  -5   1    3.80    0.25
  -5  -5   1    3.93    0.22
   5  -5  -1    4.00    0.27
  -5   5   1    3.89    0.26
   5   5  -1    4.00    0.20
  -5   5   1    3.98    0.29
   5   5  -1    3.64    0.24
  -5   5   1    3.73    0.19
  -4  -5   1    1.97    0.20
  -4  -5   1    2.06    0.14
   4  -5  -1    1.91    0.16
   4  -5  -1    1.90    0.21
  -4   5   1    2.21    0.23
  -4   5   1    2.43    0.20
   4   5  -1    1.88    0.15
  -4   5   1    2.23    0.13
   4   5  -1    2.27    0.21
   3  -5  -1   14.69    0.45
  -3  -5   1   15.80    0.50
  -3  -5   1   14.76    0.39
   3  -5  -1   14.46    0.50
  -3   5   1   14.73    0.49
  -3   5   1   14.71    0.50
   3   5  -1   14.32    0.48
  -3   5   1   14.81    0.35
   3   5  -1   14.90    0.44
  -2  -5   1    4.73    0.25
  -2  -5   1    4.71    0.16
   2  -5  -1    5.05    0.24
   2  -5  -1    4.97    0.26
   2   5  -1    4.95    0.25
  -2   5   1    4.90    0.26
  -2   5   1    5.28    0.26
   2   5  -1    5.41    0.24
  -1  -5   1   27.93    0.74
   1  -5  -1   27.61    0.72
  -1  -5   1   27.08    0.57
  -1   5   1   27.26    0.73
   1   5  -1   27.80    0.73
  -1   5   1   27.39    0.72
   1   5  -1   27.37    0.57
   1   5  -1   26.40    0.70
   0  -5   1    4.52    0.23
   0  -5  -1    3.91    0.22
   0   5   1    4.18    0.22
   0   5   1    4.36    0.23
   0   5  -1    4.06    0.23
   0   5  -1    4.13    0.23
  -1  -5  -1   27.82    0.77
  -1  -5  -1   29.61    0.61
   1  -5   1   29.23    0.77
   1  -5   1   29.92    0.76
  -1   5  -1   29.95    0.77
   1   5   1   29.78    0.75
   1   5   1   28.89    0.76
  -1   5  -1   29.05    0.77
  -2  -5  -1   25.85    0.60
  -2  -5  -1   25.29    0.72
   2  -5   1   26.85    0.74
   2  -5   1   28.39    0.56
   2  -5   1   27.16    0.70
   2   5   1   26.61    0.71
  -2   5  -1   26.67    0.55
  -2   5  -1   26.36    0.73
  -2   5  -1   25.95    0.72
   2   5   1   26.02    0.69
   3  -5   1    0.81    0.15
  -3  -5  -1    0.90    0.10
   3  -5   1    1.08    0.13
  -3  -5  -1    0.93    0.15
  -3   5  -1    0.81    0.13
  -3   5  -1    0.83    0.08
   3   5   1    0.79    0.12
   3   5   1    0.77    0.13
  -3   5  -1    0.80    0.15
  -4  -5  -1    1.88    0.14
  -4  -5  -1    2.31    0.22
   4  -5   1    1.96    0.21
   4  -5   1    2.01    0.15
   4   5   1    1.79    0.15
  -4   5  -1    2.28    0.22
   4   5   1    2.44    0.20
  -4   5  -1    1.81    0.21
  -4   5  -1    2.16    0.13
   5  -5   1    5.19    0.22
   5  -5   1    4.65    0.29
  -5  -5  -1    5.02    0.24
  -5  -5  -1    4.69    0.27
   5   5   1    4.91    0.24
  -5   5  -1    4.71    0.28
  -5   5  -1    4.44    0.21
   5   5   1    4.19    0.26
  -6  -5  -1   12.31    0.47
  -6  -5  -1   12.65    0.44
   6  -5   1   13.41    0.52
   6  -5   1   12.36    0.39
   6   5   1   12.57    0.41
  -6   5  -1   13.46    0.51
   6   5   1   12.64    0.48
  -6   5  -1   12.52    0.41
  -7  -5  -1   10.02    0.42
  -7  -5  -1   10.68    0.44
   7  -5   1    9.72    0.46
  -7   5  -1   10.93    0.48
  -7   5  -1   10.36    0.39
   7   5   1    9.79    0.44
   7   5   1    9.80    0.36
  -8  -5  -1    0.17    0.13
   8  -5   1    0.16    0.14
  -8  -5  -1    0.20    0.13
   8   5   1    0.36    0.15
  -8   5  -1    0.15    0.15
  -8   5  -1    0.27    0.13
  -9  -5  -1    0.09    0.15
   9  -5   1    0.06    0.14
  -9  -5  -1    0.02    0.13
  -9   5  -1    0.02    0.14
  -9   5  -1    0.02    0.12
   9   5   1    0.09    0.14
  10  -5   1    1.58    0.26
 -10  -5  -1    1.84    0.27
 -10   5  -1    1.75    0.25
 -10   5  -1    1.71    0.28
  10   5   1    1.79    0.27
  11  -5   1    0.12    0.16
  11  -5   1    0.23    0.20
 -11  -5  -1    0.06    0.17
 -11   5  -1   -0.12    0.15
 -11   5  -1    0.19    0.15
  11   5   1    0.25    0.18
  12  -5   1   -0.11    0.18
 -12  -5  -1    0.20    0.17
  12  -5   1   -0.07    0.19
  12   5   1   -0.17    0.16
 -12   5  -1    0.02    0.22
 -11  -6   1    6.87    0.43
  11  -6  -1    7.21    0.51
  11   6  -1    6.28    0.45
 -11   6   1    8.14    0.51
 -10  -6   1    1.71    0.28
 -10  -6   1    2.49    0.30
  10  -6  -1    2.00    0.30
 -10   6   1    1.78    0.30
  10   6  -1    2.22    0.30
  -9  -6   1    1.98    0.25
  -9  -6   1    2.22    0.28
   9  -6  -1    1.87    0.29
   9   6  -1    2.49    0.31
  -9   6   1    2.22    0.30
  -8  -6   1    1.07    0.19
  -8  -6   1    1.28    0.21
   8  -6  -1    1.78    0.27
   8   6  -1    1.51    0.24
  -8   6   1    1.61    0.25
  -7  -6   1   -0.06    0.10
  -7  -6   1   -0.16    0.11
   7  -6  -1   -0.11    0.12
  -7   6   1    0.25    0.14
   7   6  -1    0.18    0.13
   6  -6  -1    3.51    0.22
   6  -6  -1    2.64    0.29
  -6  -6   1    2.94    0.28
  -6  -6   1    3.33    0.23
  -6   6   1    3.24    0.27
   6   6  -1    3.15    0.26
   6   6  -1    2.94    0.21
  -5  -6   1   -0.05    0.09
   5  -6  -1    0.12    0.13
  -5  -6   1    0.02    0.11
   5  -6  -1    0.05    0.09
   5   6  -1    0.09    0.12
   5   6  -1    0.02    0.09
  -5   6   1    0.05    0.13
  -5   6   1    0.05    0.11
   4  -6  -1   23.56    0.74
  -4  -6   1   23.37    0.60
   4  -6  -1   23.63    0.66
  -4  -6   1   23.57    0.72
  -4   6   1   22.15    0.70
  -4   6   1   23.88    0.74
   4   6  -1   23.05    0.64
   4   6  -1   22.69    0.70
  -3  -6   1    0.08    0.06
   3  -6  -1    0.06    0.08
  -3  -6   1    0.17    0.12
   3  -6  -1    0.19    0.12
  -3   6   1    0.17    0.12
   3   6  -1    0.11    0.09
  -3   6   1    0.18    0.11
   3   6  -1    0.11    0.11
   2  -6  -1   28.64    0.77
  -2  -6   1   26.93    0.61
   2  -6  -1   27.31    0.79
  -2  -6   1   26.70    0.78
  -2   6   1   28.70    0.80
   2   6  -1   27.61    0.78
  -2   6   1   29.04    0.79
   2   6  -1   27.87    0.74
   1  -6  -1    0.39    0.11
  -1  -6   1    0.42    0.13
   1   6  -1    0.41    0.12
   1   6  -1    0.42    0.12
  -1   6   1    0.51    0.12
  -1   6   1    0.25    0.11
   0  -6   1   66.77    1.54
   0  -6  -1   63.97    1.54
   0   6  -1   67.25    1.54
   0   6  -1   65.39    1.54
   0   6   1   67.02    1.54
   0   6   1   67.60    1.54
   1  -6   1    8.58    0.35
  -1  -6  -1    7.99    0.36
   1  -6   1    8.74    0.37
  -1   6  -1    8.93    0.37
   1   6   1    8.83    0.35
   1   6   1    7.58    0.34
  -1   6  -1    7.86    0.35
   2  -6   1   -0.03    0.10
  -2  -6  -1   -0.03    0.04
  -2  -6  -1   -0.01    0.09
   2  -6   1   -0.06    0.07
  -2   6  -1    0.07    0.09
  -2   6  -1    0.03    0.09
   2   6   1   -0.01    0.09
   2   6   1    0.00    0.09
   3  -6   1   15.56    0.50
  -3  -6  -1   16.85    0.57
   3  -6   1   16.36    0.57
  -3  -6  -1   16.27    0.43
   3   6   1   15.90    0.54
  -3   6  -1   17.01    0.57
   3   6   1   16.23    0.51
  -3   6  -1   16.63    0.58
   4  -6   1    7.73    0.39
   4  -6   1    7.48    0.32
  -4  -6  -1    7.18    0.36
  -4  -6  -1    8.20    0.29
  -4   6  -1    8.57    0.40
   4   6   1    7.86    0.33
   4   6   1    7.85    0.36
  -4   6  -1    8.21    0.38
  -5  -6  -1   75.61    1.82
   5  -6   1   79.01    1.73
   5  -6   1   78.30    1.88
  -5  -6  -1   79.86    1.72
   5   6   1   78.94    1.74
   5   6   1   77.83    1.82
  -5   6  -1   76.38    1.84
  -6  -6  -1    2.30    0.25
  -6  -6  -1    2.25    0.21
   6  -6   1    2.04    0.22
   6  -6   1    1.63    0.24
   6   6   1    2.49    0.20
   6   6   1    1.89    0.24
  -6   6  -1    2.21    0.26
  -7  -6  -1   12.26    0.47
   7  -6   1   13.10    0.56
  -7  -6  -1   13.93    0.53
   7   6   1   11.20    0.50
  -7   6  -1   11.70    0.54
   8  -6   1    0.21    0.18
  -8  -6  -1    0.22    0.15
  -8  -6  -1    0.18    0.15
   8   6   1    0.34    0.16
  -8   6  -1    0.19    0.16
  -9  -6  -1    2.40    0.28
  -9  -6  -1    2.60    0.29
   9  -6   1    1.56    0.29
  -9   6  -1    1.43    0.26
   9   6   1    1.78    0.28
  10  -6   1    1.06    0.26
 -10  -6  -1    0.76    0.20
  10   6   1    0.83    0.22
 -10   6  -1    0.93    0.24
 -11  -6  -1    3.20    0.36
  11  -6   1    2.71    0.37
  11   6   1    2.89    0.36
 -11   6  -1    3.37    0.40
 -10  -7   1    1.59    0.27
  10  -7  -1    1.35    0.28
 -10   7   1    1.10    0.26
  10   7  -1    1.57    0.28
   9  -7  -1    1.83    0.30
  -9  -7   1    1.64    0.26
  -9   7   1    2.29    0.32
   9   7  -1    2.51    0.32
  -8  -7   1    0.11    0.15
   8  -7  -1    0.05    0.17
   8   7  -1    0.28    0.17
  -8   7   1    0.10    0.15
   7  -7  -1    0.16    0.17
  -7  -7   1    0.04    0.13
   7   7  -1    0.16    0.14
  -7   7   1    0.10    0.14
  -6  -7   1    0.58    0.17
   6  -7  -1    0.48    0.19
   6  -7  -1    0.43    0.15
  -6   7   1    0.56    0.18
   6   7  -1    0.37    0.16
  -5  -7   1    0.48    0.17
   5  -7  -1    0.48    0.14
   5  -7  -1    0.82    0.20
  -5   7   1    0.43    0.18
   5   7  -1    0.69    0.14
  -5   7   1    0.70    0.17
   5   7  -1    0.49    0.16
   4  -7  -1    4.40    0.32
   4  -7  -1    4.84    0.29
  -4  -7   1    4.12    0.30
  -4   7   1    4.88    0.31
   4   7  -1    4.47    0.30
  -4   7   1    4.12    0.32
   4   7  -1    4.97    0.27
   3  -7  -1    0.15    0.13
  -3  -7   1    0.05    0.12
   3  -7  -1    0.22    0.12
   3   7  -1    0.09    0.12
   3   7  -1    0.12    0.10
  -3   7   1    0.17    0.12
  -3   7   1    0.03    0.12
   2  -7  -1   17.45    0.61
  -2  -7   1   16.31    0.59
   2  -7  -1   16.46    0.57
  -2   7   1   16.89    0.60
   2   7  -1   17.01    0.59
  -2   7   1   17.12    0.59
   2   7  -1   16.51    0.55
  -1  -7   1    0.28    0.13
   1  -7  -1    0.46    0.14
   1   7  -1    0.52    0.15
  -1   7   1    0.35    0.14
  -1   7   1    0.69    0.15
   1   7  -1    0.34    0.12
   0  -7  -1    0.02    0.10
   0  -7   1   -0.04    0.10
   0  -7   1    0.00    0.11
   0   7   1   -0.04    0.09
   0   7  -1   -0.05    0.10
   0   7   1    0.01    0.10
   0   7  -1    0.07    0.10
   1  -7   1    2.97    0.27
   1  -7   1    2.99    0.27
  -1  -7  -1    2.98    0.27
   1   7   1    2.63    0.22
  -1   7  -1    2.65    0.26
   1   7   1    2.61    0.22
  -1   7  -1    2.68    0.26
   2  -7   1    8.42    0.38
   2  -7   1    8.23    0.40
  -2  -7  -1    7.48    0.38
  -2   7  -1    7.23    0.37
  -2   7  -1    7.20    0.38
   2   7   1    7.70    0.36
   2   7   1    7.34    0.36
   3  -7   1    0.56    0.17
  -3  -7  -1    0.59    0.16
   3  -7   1    0.79    0.16
  -3   7  -1    0.98    0.18
  -3   7  -1    0.49    0.16
   3   7   1    0.76    0.18
   3   7   1    0.65    0.14
  -4  -7  -1    0.36    0.15
   4  -7   1    0.25    0.13
   4  -7   1    0.31    0.15
   4   7   1   -0.04    0.09
  -4   7  -1    0.24    0.13
  -4   7  -1    0.11    0.14
   4   7   1    0.26    0.13
  -5  -7  -1    0.11    0.13
   5  -7   1    0.31    0.17
   5  -7   1    0.26    0.12
  -5   7  -1    0.29    0.15
   5   7   1    0.30    0.12
   5   7   1    0.45    0.15
   6  -7   1    1.62    0.27
  -6  -7  -1    1.58    0.24
  -6   7  -1    1.44    0.23
   6   7   1    1.84    0.25
   6   7   1    1.72    0.21
   7  -7   1   -0.23    0.13
  -7  -7  -1   -0.04    0.13
   7   7   1    0.04    0.16
  -7   7  -1    0.28    0.16
  -8  -7  -1    4.26    0.33
   8  -7   1    4.55    0.38
  -8   7  -1    3.53    0.37
   8   7   1    4.42    0.40
   9  -7   1    1.97    0.31
  -9  -7  -1    2.03    0.27
   9   7   1    1.92    0.29
  -9   7  -1    1.64    0.29
  10  -7   1    1.30    0.28
  10   7   1    2.31    0.33
 -10   7  -1    2.00    0.32
  -9  -8   1    3.26    0.36
   9  -8  -1    3.09    0.40
   9   8  -1    3.40    0.38
  -9   8   1    3.28    0.39
  -8  -8   1    2.67    0.33
   8  -8  -1    2.36    0.35
  -8   8   1    2.67    0.35
   8   8  -1    1.79    0.29
   7  -8  -1    1.50    0.28
  -7  -8   1    1.76    0.27
  -7   8   1    2.15    0.30
   7   8  -1    1.69    0.27
   6  -8  -1    5.38    0.41
  -6  -8   1    6.23    0.40
   6   8  -1    5.90    0.39
  -6   8   1    6.52    0.43
  -5  -8   1    0.12    0.15
   5  -8  -1    0.18    0.13
   5  -8  -1    0.20    0.19
   5   8  -1    0.03    0.15
  -5   8   1    0.01    0.17
  -5   8   1    0.25    0.16
   4  -8  -1    7.63    0.39
   4  -8  -1    7.71    0.44
  -4  -8   1    7.05    0.41
  -4   8   1    7.05    0.43
  -4   8   1    7.36    0.41
   4   8  -1    7.76    0.41
   4   8  -1    6.70    0.35
   3  -8  -1   -0.12    0.13
  -3  -8   1    0.07    0.13
   3  -8  -1    0.14    0.13
  -3   8   1    0.04    0.13
  -3   8   1    0.00    0.13
   3   8  -1    0.01    0.10
   3   8  -1    0.03    0.14
   2  -8  -1    0.07    0.13
   2  -8  -1    0.05    0.11
  -2  -8   1    0.13    0.13
  -2   8   1   -0.03    0.13
  -2   8   1   -0.04    0.11
   2   8  -1   -0.02    0.11
   2   8  -1   -0.01    0.12
   1  -8  -1    0.68    0.17
   1  -8  -1    0.35    0.15
  -1  -8   1    0.35    0.15
  -1   8   1    0.81    0.18
   1   8  -1    0.85    0.19
  -1   8   1    0.21    0.14
   1   8  -1    0.55    0.16
   0  -8   1    1.93    0.24
   0  -8  -1    1.65    0.24
   0  -8   1    2.05    0.25
   0   8   1    2.46    0.26
   0   8  -1    1.74    0.24
   0   8   1    2.63    0.28
   0   8  -1    2.23    0.25
  -1  -8  -1   11.65    0.50
   1  -8   1   10.60    0.48
   1  -8   1   11.26    0.48
  -1   8  -1   11.46    0.51
   1   8   1   10.69    0.47
   1   8   1   12.23    0.49
  -1   8  -1   11.57    0.50
  -2  -8  -1    3.09    0.31
   2  -8   1    3.20    0.26
   2  -8   1    3.10    0.31
  -2   8  -1    3.28    0.29
   2   8   1    3.95    0.30
   2   8   1    3.87    0.27
  -2   8  -1    3.25    0.31
   3  -8   1   25.73    0.85
  -3  -8  -1   25.74    0.84
   3  -8   1   26.77    0.80
   3   8   1   25.31    0.77
  -3   8  -1   25.70    0.84
  -3   8  -1   27.70    0.87
   3   8   1   25.41    0.81
   4  -8   1    1.21    0.20
  -4  -8  -1    1.26    0.23
   4  -8   1    1.14    0.23
  -4   8  -1    1.18    0.22
   4   8   1    1.70    0.22
  -4   8  -1    1.34    0.24
   4   8   1    1.53    0.23
   5  -8   1    6.29    0.43
   5  -8   1    6.96    0.36
  -5  -8  -1    7.04    0.41
  -5   8  -1    7.47    0.43
   5   8   1    7.29    0.42
   5   8   1    7.29    0.37
   6  -8   1    1.66    0.28
  -6  -8  -1    1.34    0.24
   6   8   1    1.41    0.24
  -6   8  -1    1.46    0.26
   7  -8   1    1.07    0.28
  -7  -8  -1    0.80    0.21
  -7   8  -1    0.90    0.23
   7   8   1    0.92    0.22
   8  -8   1    7.94    0.52
  -8  -8  -1    7.21    0.45
  -8   8  -1    8.30    0.50
   8   8   1    7.58    0.47
   9  -8   1    1.07    0.28
  -9  -8  -1    1.29    0.27
  -9   8  -1    1.12    0.28
   9   8   1    0.88    0.24
   8  -9  -1    3.02    0.41
  -8  -9   1    2.92    0.37
   8   9  -1    2.95    0.38
  -8   9   1    2.43    0.36
   7  -9  -1    0.98    0.26
  -7  -9   1    1.62    0.28
  -7   9   1    1.15    0.26
   7   9  -1    1.67    0.31
  -6  -9   1    2.31    0.33
   6  -9  -1    1.80    0.31
   6   9  -1    1.65    0.28
  -6   9   1    1.76    0.30
   5  -9  -1    1.89    0.30
  -5  -9   1    2.85    0.33
   5  -9  -1    2.23    0.28
  -5   9   1    2.55    0.34
   5   9  -1    2.17    0.30
  -5   9   1    2.11    0.30
  -4  -9   1    1.52    0.26
   4  -9  -1    1.60    0.29
   4  -9  -1    1.73    0.25
  -4   9   1    1.80    0.28
   4   9  -1    1.71    0.24
  -4   9   1    1.09    0.26
   4   9  -1    1.42    0.25
   3  -9  -1    3.58    0.37
   3  -9  -1    3.89    0.32
  -3  -9   1    3.62    0.36
   3   9  -1    3.54    0.36
   3   9  -1    4.17    0.31
  -3   9   1    4.24    0.36
  -3   9   1    4.58    0.35
   2  -9  -1    5.45    0.38
   2  -9  -1    6.47    0.38
  -2  -9   1    6.08    0.39
  -2   9   1    6.55    0.40
   2   9  -1    5.15    0.36
  -2   9   1    5.36    0.38
   2   9  -1    5.32    0.36
  -1  -9   1    0.35    0.17
   1  -9  -1    0.47    0.17
   1  -9  -1    0.59    0.19
  -1  -9   1    0.24    0.16
  -1   9   1    0.27    0.15
   1   9  -1    0.85    0.20
   1   9  -1    0.39    0.18
  -1   9   1    0.78    0.20
   0  -9  -1    3.44    0.34
   0  -9   1    3.17    0.32
   0  -9  -1    3.31    0.33
   0  -9   1    3.86    0.31
   0   9  -1    3.00    0.31
   0   9  -1    3.46    0.34
   0   9   1    3.78    0.30
   0   9   1    3.17    0.33
  -1  -9  -1    1.50    0.25
   1  -9   1    1.29    0.23
   1  -9   1    1.28    0.23
   1   9   1    1.33    0.23
  -1   9  -1    1.39    0.24
  -1   9  -1    1.83    0.27
   1   9   1    1.28    0.23
  -2  -9  -1    3.71    0.36
   2  -9   1    3.76    0.30
   2  -9   1    3.60    0.36
  -2   9  -1    3.43    0.35
   2   9   1    4.17    0.34
   2   9   1    3.23    0.32
  -2   9  -1    3.34    0.34
  -3  -9  -1    0.59    0.20
   3  -9   1    0.75    0.23
   3  -9   1    0.53    0.19
  -3   9  -1    0.44    0.21
   3   9   1    0.78    0.19
  -3   9  -1    0.90    0.21
   3   9   1    0.70    0.19
  -4  -9  -1   11.97    0.57
   4  -9   1   13.56    0.62
   4  -9   1   11.79    0.51
  -4   9  -1   12.82    0.59
  -4   9  -1   12.41    0.60
   4   9   1   12.00    0.55
   4   9   1   12.22    0.52
   5  -9   1    0.09    0.20
  -5  -9  -1    0.20    0.17
  -5   9  -1    0.04    0.16
   5   9   1    0.00    0.14
   6  -9   1    0.56    0.22
  -6  -9  -1    0.19    0.17
   6   9   1    0.47    0.22
  -6   9  -1    0.21    0.18
   7  -9   1    0.68    0.25
  -7  -9  -1    0.97    0.26
   7   9   1    0.99    0.26
  -7   9  -1    0.52    0.22
   8  -9   1    0.27    0.22
  -8  -9  -1    0.34    0.22
  -8   9  -1    0.08    0.18
   8   9   1   -0.01    0.19
  -6 -10   1    4.81    0.46
   6 -10  -1    4.23    0.45
   6  10  -1    4.85    0.46
  -6  10   1    5.09    0.48
  -5 -10   1    0.68    0.23
   5 -10  -1    0.53    0.23
  -5  10   1    0.64    0.22
   5  10  -1    0.37    0.21
   4 -10  -1    1.18    0.26
  -4 -10   1    1.28    0.26
   4 -10  -1    1.94    0.28
  -4  10   1    1.34    0.28
   4  10  -1    1.12    0.24
  -4  10   1    1.58    0.29
   3 -10  -1    0.43    0.20
   3 -10  -1    0.51    0.20
  -3 -10   1    0.31    0.18
   3  10  -1    0.02    0.17
   3  10  -1    0.20    0.18
  -3  10   1    0.41    0.19
  -3  10   1    0.29    0.19
   2 -10  -1    1.56    0.26
  -2 -10   1    1.35    0.26
   2 -10  -1    1.51    0.27
  -2 -10   1    1.41    0.25
  -2  10   1    0.90    0.23
  -2  10   1    0.96    0.23
   2  10  -1    1.28    0.24
   2  10  -1    1.40    0.26
   1 -10  -1    0.22    0.17
  -1 -10   1    0.25    0.19
  -1 -10   1    0.34    0.18
   1 -10  -1    0.58    0.20
  -1  10   1    0.26    0.18
  -1  10   1    0.31    0.18
   1  10  -1    0.55    0.20
   1  10  -1    0.42    0.19
   0 -10   1    4.42    0.37
   0 -10  -1    3.53    0.37
   0 -10   1    3.33    0.36
   0 -10  -1    3.33    0.36
   0  10  -1    4.13    0.39
   0  10   1    3.40    0.36
   0  10  -1    4.39    0.36
   0  10   1    3.45    0.36
  -1 -10  -1    0.50    0.21
   1 -10   1    0.55    0.21
   1 -10   1    0.31    0.18
  -1 -10  -1    0.25    0.20
   1  10   1    0.35    0.19
   1  10   1    0.67    0.21
  -1  10  -1    0.38    0.19
  -1  10  -1    0.18    0.17
   2 -10   1    0.91    0.24
   2 -10   1    0.92    0.23
  -2 -10  -1    0.86    0.22
   2  10   1    0.87    0.21
   2  10   1    0.90    0.21
  -2  10  -1    0.61    0.20
  -2  10  -1    0.95    0.24
   3 -10   1   -0.22    0.16
   3 -10   1   -0.23    0.15
  -3 -10  -1    0.08    0.17
  -3  10  -1   -0.11    0.15
   3  10   1   -0.08    0.14
   3  10   1    0.13    0.18
  -3  10  -1    0.02    0.17
  -4 -10  -1    0.25    0.21
   4 -10   1    0.08    0.17
   4 -10   1    0.28    0.19
  -4  10  -1   -0.16    0.15
   4  10   1    0.22    0.19
   5 -10   1    0.77    0.24
  -5 -10  -1    0.58    0.22
   5  10   1    0.33    0.21
  -5  10  -1    0.67    0.23
   6 -10   1    0.27    0.21
  -6 -10  -1   -0.10    0.17
  -6  10  -1    0.04    0.18
   6  10   1   -0.11    0.15
   3 -11  -1    0.09    0.19
   3 -11  -1    0.12    0.17
  -3 -11   1   -0.08    0.16
  -3  11   1    0.03    0.19
  -3  11   1    0.05    0.17
   3  11  -1    0.38    0.20
  -2 -11   1    0.56    0.23
   2 -11  -1    0.34    0.19
   2 -11  -1    0.58    0.24
  -2  11   1    1.12    0.29
   2  11  -1    0.88    0.24
   2  11  -1    0.52    0.21
  -2  11   1    0.85    0.24
  -1 -11   1   -0.28    0.14
   1 -11  -1   -0.13    0.15
  -1 -11   1    0.04    0.19
   1 -11  -1    0.01    0.20
   1  11  -1    0.12    0.17
  -1  11   1   -0.03    0.16
  -1  11   1   -0.08    0.18
   1  11  -1    0.18    0.17
   0 -11   1    2.40    0.34
   0 -11  -1    1.55    0.29
   0 -11  -1    1.89    0.30
   0 -11   1    2.40    0.34
   0  11   1    2.78    0.35
   0  11  -1    1.71    0.30
   0  11   1    2.09    0.32
   0  11  -1    2.74    0.35
   1 -11   1    0.60    0.21
   1 -11   1    0.48    0.21
  -1 -11  -1    0.65    0.24
  -1 -11  -1    0.20    0.20
   1  11   1    0.49    0.22
  -1  11  -1    0.39    0.21
   1  11   1    0.60    0.21
  -1  11  -1    0.45    0.22
  -2 -11  -1    3.20    0.37
   2 -11   1    2.37    0.36
  -2 -11  -1    2.64    0.35
   2 -11   1    2.50    0.34
   2  11   1    2.63    0.34
  -2  11  -1    2.47    0.36
  -2  11  -1    2.58    0.35
   2  11   1    2.82    0.35
   3 -11   1    0.70    0.25
   3 -11   1    0.96    0.24
  -3 -11  -1    0.83    0.25
  -3  11  -1    0.85    0.26
  -3  11  -1    0.72    0.24
   3  11   1    1.23    0.26
  13   0  -2    5.85    0.45
 -13   0   2    5.96    0.44
 -12   0   2    0.50    0.20
  12   0  -2    0.42    0.19
 -11   0   2   14.25    0.61
  11   0  -2   15.46    0.64
 -10   0   2   24.07    0.79
  10   0  -2   24.31    0.81
  10   0  -2   25.31    0.72
   9   0  -2    0.16    0.12
  -9   0   2    0.25    0.13
   9   0  -2    0.03    0.10
   8   0  -2   37.68    1.02
  -8   0   2   38.22    0.86
  -8   0   2   38.30    1.01
   8   0  -2   39.35    0.95
  -7   0   2   11.46    0.42
   7   0  -2   10.94    0.42
   7   0  -2   12.24    0.38
  -7   0   2   11.75    0.33
   6   0  -2   55.07    1.22
  -6   0   2   55.87    1.29
  -6   0   2   53.05    1.26
  -6   0   2   54.43    1.16
   6   0  -2   55.43    1.28
   5   0  -2  312.77    6.21
  -5   0   2  307.73    6.27
  -5   0   2  315.95    6.17
  -5   0   2  313.24    6.26
   5   0  -2  309.88    6.27
  -4   0   2  181.30    3.72
   4   0  -2  189.41    3.74
   4   0  -2  180.13    3.68
  -4   0   2  185.92    3.74
  -4   0   2  182.54    3.66
   3   0  -2  192.32    3.76
  -3   0   2  191.48    3.80
  -3   0   2  187.48    3.79
  -3   0   2  187.87    3.75
   3   0  -2  186.44    3.79
   2   0  -2  131.43    2.70
   2   0  -2  135.50    2.68
  -2   0   2  138.65    2.71
  -2   0   2  133.21    2.68
  -2   0   2  133.39    2.71
  -1   0   2  421.55    8.50
   1   0  -2  440.98    8.62
  -1   0   2  428.55    8.44
  -1   0   2  410.50    8.50
  -1   0   2  430.10    8.56
   1   0  -2  429.02    8.43
   1   0  -2  424.69    8.56
   0   0  -2   17.44    0.38
   0   0   2   16.01    0.38
   0   0   2   18.35    0.38
  -1   0  -2  154.02    3.08
   1   0   2  154.32    3.09
  -1   0  -2  158.98    3.11
  -1   0  -2  152.43    3.08
   1   0   2  154.67    3.08
  -1   0  -2  155.80    3.11
   2   0   2    7.05    0.21
  -2   0  -2    7.44    0.16
   2   0   2    7.52    0.17
  -2   0  -2    7.06    0.21
  -2   0  -2    7.66    0.22
   2   0   2    7.42    0.21
   3   0   2  299.98    5.92
  -3   0  -2  292.55    5.94
  -3   0  -2  300.46    5.93
   3   0   2  296.54    5.93
   3   0   2  299.81    5.92
  -3   0  -2  300.55    5.93
  -4   0  -2   12.08    0.28
  -4   0  -2   11.90    0.36
   4   0   2   11.93    0.36
   4   0   2   12.17    0.35
  -4   0  -2   11.83    0.36
  -5   0  -2  111.35    2.38
  -5   0  -2  112.10    2.38
   5   0   2  115.36    2.36
  -5   0  -2  113.48    2.24
   5   0   2  109.85    2.37
   6   0   2    0.17    0.09
  -6   0  -2    0.20    0.09
  -6   0  -2    0.29    0.10
   6   0   2    0.23    0.09
  -6   0  -2    0.32    0.05
  -7   0  -2    2.23    0.22
  -7   0  -2    1.63    0.19
   7   0   2    2.00    0.21
   7   0   2    1.88    0.16
  -7   0  -2    1.83    0.09
  -8   0  -2    0.77    0.17
   8   0   2    0.88    0.16
  -8   0  -2    0.86    0.16
   8   0   2    0.80    0.14
   9   0   2    2.01    0.24
   9   0   2    1.80    0.21
  -9   0  -2    1.78    0.23
  10   0   2    9.37    0.41
 -10   0  -2    9.80    0.47
  10   0   2    9.02    0.46
 -11   0  -2    1.75    0.26
  11   0   2    1.65    0.26
  11   0   2    2.08    0.25
 -12   0  -2    3.25    0.36
  12   0   2    2.43    0.32
 -13   0  -2    0.82    0.24
  13   0   2    0.73    0.24
  13  -1  -2    0.30    0.20
 -13  -1   2    0.07    0.17
  13   1  -2   -0.02    0.19
 -13   1   2    0.06    0.19
 -12  -1   2    1.93    0.30
  12  -1  -2    2.41    0.32
  12   1  -2    1.99    0.30
 -12   1   2    2.77    0.33
 -11  -1   2   -0.05    0.15
  11  -1  -2    0.07    0.15
  11  -1  -2   -0.02    0.12
  11   1  -2    0.28    0.16
 -11   1   2   -0.13    0.12
 -10  -1   2    2.08    0.26
  10  -1  -2    1.95    0.26
  10  -1  -2    1.83    0.22
 -10   1   2    2.17    0.26
  10   1  -2    1.78    0.25
 -10   1   2    1.92    0.26
   9  -1  -2    0.27    0.11
   9  -1  -2    0.34    0.14
  -9  -1   2    0.11    0.12
  -9   1   2    0.24    0.13
   9   1  -2    0.31    0.14
  -9   1   2    0.25    0.13
   9   1  -2    0.31    0.11
  -8  -1   2    1.11    0.12
  -8  -1   2    0.87    0.16
   8  -1  -2    0.91    0.17
   8  -1  -2    0.49    0.12
   8   1  -2    1.02    0.17
  -8   1   2    1.02    0.17
   8   1  -2    0.95    0.13
  -8   1   2    0.83    0.16
   7  -1  -2    7.86    0.35
   7  -1  -2    7.97    0.32
  -7  -1   2    7.72    0.27
  -7  -1   2    7.41    0.33
  -7   1   2    7.99    0.34
  -7   1   2    8.35    0.36
   7   1  -2    7.36    0.34
  -7   1   2    7.98    0.24
   7   1  -2    8.38    0.29
   6  -1  -2   24.09    0.67
  -6  -1   2   24.14    0.59
  -6  -1   2   23.53    0.66
   6   1  -2   25.44    0.68
  -6   1   2   24.12    0.68
  -6   1   2   24.34    0.66
   6   1  -2   24.30    0.59
  -6   1   2   24.98    0.56
  -5  -1   2   -0.04    0.06
  -5  -1   2    0.10    0.05
   5  -1  -2    0.13    0.07
   5  -1  -2    0.05    0.07
   5   1  -2    0.05    0.05
   5   1  -2    0.01    0.07
  -5   1   2    0.06    0.04
  -5   1   2    0.06    0.06
  -5   1   2    0.11    0.07
  -4  -1   2    5.89    0.19
  -4  -1   2    5.60    0.22
   4  -1  -2    5.59    0.21
  -4   1   2    5.72    0.17
  -4   1   2    5.44    0.22
   4   1  -2    5.52    0.18
   4   1  -2    5.56    0.22
  -4   1   2    5.49    0.21
  -3  -1   2   77.65    1.64
  -3  -1   2   78.57    1.66
   3  -1  -2   80.02    1.66
  -3   1   2   81.66    1.68
  -3   1   2   79.46    1.66
  -3   1   2   81.37    1.62
   3   1  -2   80.19    1.67
   3   1  -2   80.91    1.61
   2  -1  -2   25.82    0.57
  -2  -1   2   26.48    0.53
  -2  -1   2   24.82    0.57
  -2  -1   2   25.82    0.57
   2   1  -2   25.34    0.58
  -2   1   2   25.91    0.55
  -2   1   2   25.76    0.56
   2   1  -2   25.77    0.53
  -2   1   2   24.95    0.58
  -2   1   2   25.56    0.57
  -1  -1   2    2.51    0.09
  -1  -1   2    2.43    0.07
  -1  -1   2    2.47    0.10
   1  -1  -2    2.51    0.09
  -1   1   2    2.48    0.09
   1   1  -2    2.47    0.07
  -1   1   2    2.41    0.09
  -1   1   2    2.41    0.10
  -1   1   2    2.63    0.08
   1   1  -2    2.38    0.10
   0  -1  -2  291.35    5.83
   0  -1  -2  293.12    5.81
   0  -1   2  287.04    5.81
   0  -1   2  287.37    5.80
   0  -1  -2  288.36    5.75
   0  -1   2  296.47    5.75
   0   1   2  290.27    5.75
   0   1  -2  281.44    5.69
   0   1   2  282.89    5.72
   0   1  -2  298.80    5.75
   0   1  -2  282.58    5.76
   0   1   2  279.17    5.75
  -1  -1  -2  565.15   11.33
   1  -1   2  557.79   11.25
   1  -1   2  562.50   11.27
  -1  -1  -2  588.94   11.41
   1   1   2  550.01   11.28
   1   1   2  569.22   11.39
  -1   1  -2  574.02   11.44
  -1   1  -2  576.46   11.26
  -1   1  -2  568.67   11.32
   2  -1   2  216.51    4.29
  -2  -1  -2  215.86    4.32
   2  -1   2  219.24    4.30
   2  -1   2  215.71    4.33
  -2  -1  -2  217.39    4.30
  -2   1  -2  218.33    4.31
  -2   1  -2  212.90    4.30
   2   1   2  210.26    4.31
  -2   1  -2  224.41    4.33
   2   1   2  220.47    4.31
   3  -1   2    1.56    0.12
  -3  -1  -2    1.71    0.11
   3  -1   2    1.51    0.04
   3  -1   2    1.48    0.04
  -3  -1  -2    1.55    0.08
  -3   1  -2    1.38    0.10
  -3   1  -2    1.58    0.11
   3   1   2    1.49    0.10
   3   1   2    1.57    0.10
  -4  -1  -2   39.35    0.90
   4  -1   2   38.53    0.90
   4  -1   2   39.19    0.77
  -4  -1  -2   38.60    0.83
  -4   1  -2   38.29    0.90
  -4   1  -2   38.53    0.89
   4   1   2   38.05    0.87
   4   1   2   39.64    0.90
  -5  -1  -2   23.39    0.62
   5  -1   2   23.12    0.47
   5  -1   2   23.63    0.47
  -5  -1  -2   23.26    0.54
   5  -1   2   22.50    0.61
   5   1   2   22.77    0.61
   5   1   2   22.10    0.58
  -5   1  -2   22.98    0.62
  -5   1  -2   23.48    0.62
   6  -1   2   33.08    0.67
   6  -1   2   32.79    0.86
  -6  -1  -2   32.96    0.86
  -6  -1  -2   32.99    0.75
   6  -1   2   33.41    0.67
   6  -1   2   33.92    0.85
  -6   1  -2   32.67    0.85
  -6   1  -2   32.49    0.86
  -6   1  -2   32.99    0.66
   6   1   2   33.43    0.81
   6   1   2   34.02    0.85
   7  -1   2    0.93    0.15
   7  -1   2    1.13    0.16
  -7  -1  -2    0.79    0.09
  -7  -1  -2    0.73    0.14
   7   1   2    0.79    0.12
  -7   1  -2    0.75    0.14
   7   1   2    0.90    0.15
  -7   1  -2    0.89    0.15
   8  -1   2    0.29    0.13
   8  -1   2    0.15    0.11
  -8  -1  -2    0.31    0.12
  -8   1  -2    0.33    0.13
   8   1   2    0.54    0.14
  -8   1  -2    0.45    0.13
   8   1   2    0.29    0.11
  -9  -1  -2    1.81    0.23
   9  -1   2    1.73    0.23
   9  -1   2    1.68    0.21
  -9   1  -2    1.62    0.22
  -9   1  -2    2.23    0.26
   9   1   2    1.73    0.19
   9   1   2    1.61    0.22
  10  -1   2    5.79    0.34
 -10  -1  -2    6.18    0.38
  10  -1   2    5.45    0.36
  10   1   2    5.44    0.36
 -10   1  -2    5.86    0.38
 -10   1  -2    6.03    0.37
  10   1   2    6.15    0.32
 -11  -1  -2    2.73    0.31
  11  -1   2    2.55    0.31
  11  -1   2    2.88    0.30
 -11   1  -2    2.78    0.31
  11   1   2    2.32    0.30
 -12  -1  -2    0.32    0.18
  12  -1   2    0.01    0.16
  12   1   2    0.41    0.20
 -12   1  -2    0.24    0.18
  13  -1   2    0.01    0.17
 -13  -1  -2   -0.19    0.18
  13   1   2    0.02    0.20
 -13   1  -2   -0.05    0.17
  13  -2  -2    1.51    0.29
 -13  -2   2    1.60    0.29
  13   2  -2    1.40    0.29
 -13   2   2    1.50    0.28
  12  -2  -2    3.46    0.37
 -12  -2   2    4.22    0.40
  12   2  -2    5.10    0.39
 -12   2   2    4.11    0.41
 -12   2   2    4.52    0.42
  11  -2  -2    0.16    0.16
 -11  -2   2    0.22    0.16
  11  -2  -2    0.14    0.12
  11   2  -2   -0.02    0.14
 -11   2   2    0.06    0.15
 -11   2   2    0.09    0.15
 -10  -2   2    3.40    0.29
  10  -2  -2    3.38    0.26
  10  -2  -2    3.78    0.31
 -10   2   2    3.76    0.34
 -10   2   2    3.40    0.34
  10   2  -2    3.53    0.33
   9  -2  -2    6.79    0.34
   9  -2  -2    7.02    0.38
  -9  -2   2    7.15    0.37
  -9   2   2    7.33    0.39
  -9   2   2    7.48    0.37
   9   2  -2    7.39    0.38
  -8  -2   2   67.17    1.49
   8  -2  -2   65.68    1.61
  -8  -2   2   65.50    1.59
  -8   2   2   65.27    1.61
   8   2  -2   68.36    1.61
  -8   2   2   68.48    1.59
   8   2  -2   68.67    1.48
   7  -2  -2   14.86    0.49
  -7  -2   2   14.63    0.44
  -7  -2   2   14.40    0.50
   7  -2  -2   14.95    0.38
   7  -2  -2   14.74    0.52
  -7   2   2   14.68    0.37
   7   2  -2   15.50    0.42
   7   2  -2   16.46    0.53
  -7   2   2   14.62    0.49
  -7   2   2   15.30    0.52
   6  -2  -2   39.75    0.96
  -6  -2   2   38.49    0.97
   6  -2  -2   39.22    0.85
  -6  -2   2   38.62    0.91
   6   2  -2   38.87    0.98
  -6   2   2   39.01    0.85
  -6   2   2   38.91    0.96
   6   2  -2   38.84    0.88
  -6   2   2   41.70    1.00
  -5  -2   2    0.03    0.06
   5  -2  -2    0.04    0.04
   5  -2  -2    0.11    0.07
  -5  -2   2    0.05    0.06
  -5   2   2    0.09    0.07
   5   2  -2    0.00    0.07
  -5   2   2    0.00    0.07
   5   2  -2   -0.03    0.04
  -5   2   2    0.00    0.04
   4  -2  -2   16.19    0.45
   4  -2  -2   15.64    0.38
  -4  -2   2   15.72    0.42
  -4  -2   2   15.01    0.43
   4   2  -2   15.69    0.38
  -4   2   2   15.48    0.38
   4   2  -2   15.54    0.45
  -4   2   2   15.51    0.42
  -4   2   2   15.63    0.45
  -3  -2   2    0.16    0.06
   3  -2  -2    0.17    0.07
   3  -2  -2    0.08    0.04
  -3  -2   2   -0.06    0.05
   3   2  -2    0.05    0.03
  -3   2   2    0.07    0.04
  -3   2   2    0.11    0.05
   3   2  -2    0.11    0.06
  -3   2   2    0.07    0.06
  -3   2   2    0.13    0.06
  -2  -2   2    9.71    0.26
   2  -2  -2   10.14    0.27
  -2  -2   2    9.58    0.28
  -2   2   2    9.87    0.25
   2   2  -2    9.81    0.24
   2   2  -2   10.07    0.29
  -2   2   2    9.64    0.28
   1  -2  -2   78.29    1.59
  -1  -2   2   77.43    1.55
  -1  -2   2   75.65    1.59
   1  -2  -2   80.16    1.54
   1   2  -2   75.64    1.59
  -1   2   2   77.58    1.60
  -1   2   2   74.57    1.58
   1   2  -2   76.20    1.56
  -1   2   2   78.46    1.53
   0  -2   2  886.34   17.33
   0  -2  -2  887.26   18.73
   0  -2   2  868.95   17.48
   0  -2   2  874.83   17.64
   0  -2  -2  867.00   17.68
   0   2  -2  869.25   17.52
   0   2  -2  896.55   17.34
   0   2  -2  918.16   17.71
   0   2   2  885.05   17.32
   0   2   2  856.02   17.47
   0   2   2  866.72   17.63
   0   2  -2  894.54   17.33
  -1  -2  -2   40.90    0.88
   1  -2   2   38.81    0.88
   1  -2   2   40.96    0.86
  -1  -2  -2   40.85    0.84
   1   2   2   39.37    0.87
  -1   2  -2   41.32    0.83
  -1   2  -2   39.83    0.88
  -1   2  -2   40.46    0.88
   1   2   2   40.83    0.87
   2  -2   2   50.54    1.12
   2  -2   2   51.86    1.07
  -2  -2  -2   51.67    1.09
  -2  -2  -2   52.35    1.11
  -2   2  -2   50.72    1.12
   2   2   2   50.40    1.10
   2   2   2   52.44    1.10
  -2   2  -2   51.91    1.08
   3  -2   2   35.91    0.76
  -3  -2  -2   36.65    0.83
   3  -2   2   36.68    0.86
  -3  -2  -2   37.48    0.83
   3   2   2   36.02    0.83
  -3   2  -2   37.08    0.85
   3   2   2   36.31    0.81
  -3   2  -2   36.26    0.82
  -4  -2  -2    0.54    0.09
   4  -2   2    0.56    0.05
  -4  -2  -2    0.61    0.08
   4  -2   2    0.62    0.10
  -4   2  -2    0.60    0.10
   4   2   2    0.39    0.07
  -4   2  -2    0.46    0.09
   4   2   2    0.33    0.08
  -5  -2  -2   24.88    0.66
   5  -2   2   24.34    0.52
   5  -2   2   25.01    0.67
  -5  -2  -2   23.94    0.60
   5   2   2   24.02    0.65
   5   2   2   24.26    0.61
  -5   2  -2   25.83    0.68
  -5   2  -2   25.02    0.65
  -6  -2  -2   94.52    1.97
   6  -2   2   93.48    2.06
  -6  -2  -2   95.93    2.07
  -6   2  -2   91.12    2.07
   6   2   2   95.36    2.00
  -6   2  -2   94.88    2.05
   6   2   2   92.60    2.05
  -7  -2  -2    4.84    0.21
  -7  -2  -2    4.90    0.28
   7  -2   2    5.26    0.28
  -7   2  -2    5.23    0.29
   7   2   2    4.66    0.27
  -7   2  -2    5.37    0.29
   7   2   2    4.83    0.24
   8  -2   2   79.20    1.83
   8  -2   2   80.29    1.86
  -8  -2  -2   78.16    1.70
  -8  -2  -2   79.15    1.84
  -8   2  -2   77.12    1.85
   8   2   2   76.69    1.83
  -8   2  -2   80.06    1.83
   8   2   2   80.67    1.76
  -9  -2  -2    0.27    0.14
   9  -2   2    0.13    0.13
   9  -2   2    0.01    0.12
   9   2   2    0.06    0.10
  -9   2  -2    0.18    0.13
  -9   2  -2    0.13    0.12
   9   2   2    0.03    0.11
  10  -2   2    2.56    0.28
  10  -2   2    2.54    0.29
 -10  -2  -2    2.63    0.29
 -10   2  -2    2.14    0.26
  10   2   2    2.22    0.27
 -10   2  -2    2.73    0.30
  11  -2   2    2.55    0.32
  11  -2   2    2.67    0.30
 -11  -2  -2    2.84    0.33
 -11   2  -2    2.86    0.33
  11   2   2    2.84    0.32
 -11   2  -2    3.21    0.34
  12  -2   2    7.70    0.49
  12  -2   2    8.73    0.47
 -12  -2  -2    6.63    0.45
 -12   2  -2    8.63    0.52
  12   2   2    6.65    0.45
 -12   2  -2    7.86    0.49
 -13  -2  -2    1.50    0.29
  13  -2   2    1.31    0.29
 -13   2  -2    1.57    0.29
  13   2   2    1.14    0.26
  13  -3  -2    0.07    0.18
 -13  -3   2    0.18    0.22
 -13   3   2    0.25    0.19
  13   3  -2    0.20    0.19
 -13   3   2    0.30    0.21
  12  -3  -2   -0.01    0.16
 -12  -3   2   -0.08    0.16
  12  -3  -2   -0.02    0.15
  12   3  -2   -0.19    0.15
 -12   3   2   -0.17    0.15
 -12   3   2    0.05    0.17
  11  -3  -2    0.13    0.15
  11  -3  -2    0.24    0.16
 -11  -3   2    0.22    0.16
 -11   3   2    0.38    0.17
 -11   3   2    0.10    0.16
  11   3  -2    0.03    0.15
  10  -3  -2    1.35    0.22
  10  -3  -2    0.72    0.19
 -10  -3   2    1.96    0.26
 -10   3   2    1.24    0.21
  10   3  -2    0.97    0.21
 -10   3   2    1.19    0.23
  -9  -3   2    3.73    0.23
  -9  -3   2    3.60    0.28
   9  -3  -2    3.51    0.28
   9  -3  -2    3.64    0.27
  -9   3   2    3.56    0.29
  -9   3   2    3.00    0.25
   9   3  -2    3.68    0.29
   8  -3  -2    1.55    0.20
  -8  -3   2    2.07    0.20
  -8  -3   2    1.78    0.22
   8   3  -2    1.96    0.15
  -8   3   2    1.91    0.22
   8   3  -2    2.21    0.24
  -8   3   2    1.80    0.23
  -7  -3   2   17.27    0.55
   7  -3  -2   17.61    0.57
   7  -3  -2   16.99    0.44
  -7  -3   2   16.33    0.51
   7   3  -2   17.67    0.58
   7   3  -2   16.77    0.46
  -7   3   2   17.75    0.59
  -7   3   2   16.54    0.53
   6  -3  -2    0.76    0.14
  -6  -3   2    0.66    0.13
  -6  -3   2    0.70    0.11
   6  -3  -2    0.90    0.10
   6   3  -2    0.60    0.09
  -6   3   2    0.71    0.12
   6   3  -2    0.58    0.12
  -6   3   2    0.55    0.13
   5  -3  -2    1.99    0.17
  -5  -3   2    2.07    0.15
  -5  -3   2    2.41    0.16
   5  -3  -2    1.97    0.12
  -5   3   2    2.23    0.15
   5   3  -2    2.15    0.17
   5   3  -2    2.36    0.13
  -5   3   2    2.36    0.18
  -4  -3   2   62.94    1.36
  -4  -3   2   60.16    1.37
   4  -3  -2   63.10    1.41
   4  -3  -2   61.55    1.33
  -4   3   2   63.21    1.34
   4   3  -2   62.55    1.31
  -4   3   2   62.19    1.40
  -4   3   2   62.88    1.41
   4   3  -2   61.61    1.40
   3  -3  -2  109.62    2.27
   3  -3  -2  111.05    2.33
  -3  -3   2  109.47    2.27
  -3  -3   2  111.59    2.32
   3   3  -2  108.18    2.31
   3   3  -2  108.82    2.24
  -3   3   2  114.13    2.34
  -3   3   2  110.69    2.24
  -3   3   2  110.81    2.31
  -2  -3   2    3.56    0.17
  -2  -3   2    3.44    0.13
   2  -3  -2    3.45    0.16
   2   3  -2    3.40    0.14
   2   3  -2    3.42    0.17
  -2   3   2    3.29    0.16
  -2   3   2    3.45    0.12
  -2   3   2    3.42    0.18
  -1  -3   2  122.97    2.41
   1  -3  -2  119.78    2.38
  -1  -3   2  121.97    2.49
   1  -3  -2  122.10    2.38
   1  -3  -2  122.42    2.48
  -1   3   2  119.23    2.48
   1   3  -2  121.54    2.49
   1   3  -2  119.22    2.46
  -1   3   2  118.79    2.49
   0  -3  -2   34.34    0.82
   0  -3  -2   36.09    0.72
   0   3  -2   36.56    0.72
   0   3   2   36.11    0.81
   0   3   2   35.27    0.81
   0   3   2   36.04    0.72
   0   3  -2   36.33    0.81
   0   3  -2   35.62    0.72
   0   3  -2   34.29    0.82
   1  -3   2   10.97    0.33
   1  -3   2   10.96    0.31
  -1  -3  -2   10.76    0.26
  -1  -3  -2   10.99    0.33
   1   3   2   10.86    0.31
  -1   3  -2   10.87    0.33
  -1   3  -2   10.85    0.25
   1   3   2   10.58    0.31
  -1   3  -2   10.26    0.32
   2  -3   2   11.62    0.36
  -2  -3  -2   11.99    0.36
   2  -3   2   11.44    0.32
  -2  -3  -2   11.15    0.30
  -2   3  -2   11.37    0.35
  -2   3  -2   11.52    0.29
  -2   3  -2   11.37    0.36
   2   3   2   11.37    0.33
   2   3   2   11.92    0.34
   3  -3   2   -0.04    0.04
  -3  -3  -2   -0.10    0.05
   3  -3   2   -0.02    0.07
  -3  -3  -2   -0.04    0.06
   3   3   2   -0.04    0.05
   3   3   2   -0.05    0.05
  -3   3  -2   -0.13    0.04
  -3   3  -2   -0.03    0.06
   4  -3   2    5.12    0.25
  -4  -3  -2    4.96    0.22
   4  -3   2    5.13    0.17
  -4  -3  -2    5.17    0.23
   4   3   2    5.29    0.23
  -4   3  -2    4.92    0.24
   4   3   2    5.15    0.21
  -4   3  -2    5.39    0.21
  -5  -3  -2   14.13    0.44
   5  -3   2   14.04    0.47
  -5  -3  -2   14.15    0.43
   5  -3   2   13.72    0.34
  -5   3  -2   13.93    0.47
   5   3   2   14.33    0.45
   5   3   2   13.65    0.41
  -5   3  -2   14.23    0.43
  -6  -3  -2    0.23    0.10
  -6  -3  -2    0.10    0.08
   6  -3   2    0.17    0.05
   6  -3   2    0.13    0.10
   6   3   2    0.23    0.09
  -6   3  -2    0.07    0.08
  -6   3  -2    0.10    0.09
   6   3   2    0.12    0.07
   7  -3   2    2.79    0.23
  -7  -3  -2    2.93    0.22
  -7  -3  -2    2.53    0.18
   7   3   2    2.29    0.23
  -7   3  -2    2.67    0.22
  -7   3  -2    2.42    0.24
   7   3   2    2.75    0.19
  -8  -3  -2    5.66    0.32
   8  -3   2    6.39    0.35
  -8  -3  -2    5.54    0.27
   8   3   2    6.40    0.28
  -8   3  -2    5.62    0.34
  -8   3  -2    6.02    0.33
   8   3   2    5.62    0.32
   9  -3   2    0.69    0.18
  -9  -3  -2    0.64    0.17
   9  -3   2    0.83    0.19
   9   3   2    0.63    0.16
   9   3   2    0.80    0.14
  -9   3  -2    0.72    0.18
  -9   3  -2    0.60    0.16
 -10  -3  -2    0.25    0.15
  10  -3   2    0.38    0.17
  10  -3   2    0.18    0.16
 -10   3  -2    0.40    0.17
  10   3   2    0.28    0.15
 -10   3  -2    0.25    0.15
  11  -3   2    0.36    0.17
  11  -3   2    0.32    0.20
 -11  -3  -2    0.14    0.16
  11   3   2    0.27    0.18
 -11   3  -2    0.19    0.19
 -11   3  -2    0.22    0.17
 -12  -3  -2    0.24    0.20
  12  -3   2    0.08    0.19
  12  -3   2   -0.05    0.14
  12   3   2    0.10    0.17
 -12   3  -2    0.26    0.19
 -12   3  -2   -0.14    0.18
  13  -3   2    1.07    0.27
 -13  -3  -2    0.53    0.22
  13   3   2    0.70    0.23
 -13   3  -2    0.59    0.23
 -13   3  -2    0.77    0.26
  12  -4  -2    0.17    0.18
 -12  -4   2    0.23    0.17
  12  -4  -2    0.13    0.17
  12   4  -2    0.26    0.19
 -12   4   2    0.39    0.20
 -12   4   2    0.44    0.18
 -11  -4   2    3.54    0.36
  11  -4  -2    3.11    0.36
  11  -4  -2    2.90    0.33
  11   4  -2    3.72    0.39
 -11   4   2    3.00    0.32
 -11   4   2    3.80    0.39
 -10  -4   2    2.37    0.29
  10  -4  -2    2.43    0.30
  10  -4  -2    2.03    0.28
 -10   4   2    2.32    0.27
  10   4  -2    2.57    0.30
 -10   4   2    2.11    0.29
  -9  -4   2   -0.08    0.11
  -9  -4   2    0.00    0.10
   9  -4  -2    0.02    0.13
   9   4  -2    0.01    0.13
  -9   4   2   -0.10    0.11
  -9   4   2    0.01    0.12
   8  -4  -2    2.02    0.25
  -8  -4   2    2.53    0.25
  -8  -4   2    2.18    0.22
  -8   4   2    1.68    0.23
  -8   4   2    2.44    0.24
   8   4  -2    1.98    0.24
   7  -4  -2    4.68    0.20
  -7  -4   2    3.67    0.25
   7  -4  -2    5.04    0.31
  -7  -4   2    4.61    0.27
   7   4  -2    4.95    0.29
   7   4  -2    4.31    0.21
  -7   4   2    4.58    0.26
  -7   4   2    4.69    0.29
   6  -4  -2   33.63    0.93
  -6  -4   2   34.23    0.88
   6  -4  -2   34.91    0.81
  -6  -4   2   34.04    0.89
  -6   4   2   34.11    0.85
   6   4  -2   33.35    0.80
  -6   4   2   34.96    0.93
   6   4  -2   35.97    0.93
  -5  -4   2   28.26    0.72
  -5  -4   2   27.69    0.75
   5  -4  -2   27.75    0.68
   5  -4  -2   27.53    0.78
   5   4  -2   28.06    0.76
  -5   4   2   27.76    0.78
  -5   4   2   28.19    0.77
  -5   4   2   27.57    0.69
   5   4  -2   28.02    0.67
   4  -4  -2   12.35    0.44
  -4  -4   2   12.27    0.42
   4  -4  -2   12.55    0.38
  -4  -4   2   12.39    0.38
  -4   4   2   12.70    0.42
   4   4  -2   12.38    0.35
  -4   4   2   12.15    0.35
  -4   4   2   12.31    0.44
   4   4  -2   12.89    0.43
  -3  -4   2    1.20    0.11
   3  -4  -2    1.57    0.14
   3  -4  -2    1.41    0.16
  -3  -4   2    1.32    0.15
  -3   4   2    1.44    0.09
   3   4  -2    1.21    0.14
  -3   4   2    1.91    0.15
  -3   4   2    1.45    0.16
   3   4  -2    1.26    0.11
  -2  -4   2    5.74    0.19
   2  -4  -2    6.17    0.25
  -2  -4   2    6.43    0.26
  -2   4   2    5.90    0.16
   2   4  -2    6.11    0.23
  -2   4   2    6.47    0.27
   2   4  -2    5.97    0.25
  -2   4   2    5.76    0.25
   1  -4  -2   28.90    0.72
  -1  -4   2   28.48    0.60
  -1  -4   2   29.06    0.73
   1   4  -2   28.67    0.69
   1   4  -2   28.92    0.61
  -1   4   2   29.11    0.72
  -1   4   2   27.16    0.70
   1   4  -2   29.02    0.72
   0  -4  -2   18.59    0.50
   0   4  -2   18.16    0.49
   0   4   2   16.68    0.48
   0   4   2   17.33    0.49
   0   4  -2   17.38    0.50
   1  -4   2    3.90    0.20
  -1  -4  -2    4.03    0.21
   1  -4   2    4.60    0.20
   1  -4   2    4.31    0.11
  -1  -4  -2    4.12    0.13
   1   4   2    4.40    0.20
  -1   4  -2    4.37    0.11
  -1   4  -2    4.28    0.21
  -1   4  -2    4.21    0.20
   1   4   2    4.12    0.20
  -2  -4  -2    4.41    0.16
  -2  -4  -2    4.46    0.22
   2  -4   2    4.56    0.23
   2  -4   2    4.86    0.21
  -2   4  -2    4.56    0.22
   2   4   2    4.76    0.21
   2   4   2    4.85    0.21
  -2   4  -2    4.44    0.23
  -2   4  -2    4.50    0.14
   3  -4   2   10.42    0.33
   3  -4   2   11.24    0.39
  -3  -4  -2   10.74    0.32
  -3  -4  -2   10.65    0.37
  -3   4  -2   10.48    0.38
  -3   4  -2   11.02    0.30
   3   4   2   10.86    0.37
   3   4   2   11.43    0.35
  -3   4  -2   10.46    0.38
  -4  -4  -2   12.24    0.37
   4  -4   2   11.42    0.34
  -4  -4  -2   11.74    0.40
   4  -4   2   11.41    0.42
   4   4   2   11.06    0.39
  -4   4  -2   11.63    0.41
  -4   4  -2   11.37    0.34
   4   4   2   11.41    0.36
   5  -4   2    4.26    0.18
  -5  -4  -2    4.01    0.22
   5  -4   2    4.57    0.27
  -5  -4  -2    3.97    0.22
  -5   4  -2    4.08    0.20
   5   4   2    4.39    0.21
   5   4   2    4.16    0.23
  -5   4  -2    3.78    0.24
   6  -4   2   37.74    0.85
  -6  -4  -2   38.78    0.97
   6  -4   2   38.88    1.03
  -6  -4  -2   37.52    0.96
  -6   4  -2   37.34    1.02
   6   4   2   37.73    0.99
   6   4   2   39.35    0.93
  -6   4  -2   40.19    0.95
  -7  -4  -2    0.03    0.09
  -7  -4  -2    0.14    0.12
   7  -4   2   -0.03    0.11
  -7   4  -2    0.14    0.11
  -7   4  -2    0.07    0.11
   7   4   2   -0.01    0.10
   7   4   2    0.08    0.08
  -8  -4  -2    3.29    0.24
  -8  -4  -2    3.37    0.26
   8  -4   2    3.62    0.30
   8   4   2    3.62    0.22
   8   4   2    3.20    0.26
  -8   4  -2    3.15    0.24
  -8   4  -2    3.31    0.31
   9  -4   2   -0.09    0.11
  -9  -4  -2    0.18    0.13
  -9   4  -2    0.09    0.13
   9   4   2   -0.09    0.11
  -9   4  -2   -0.06    0.12
  10  -4   2    0.03    0.14
  10  -4   2    0.27    0.16
 -10  -4  -2   -0.01    0.13
 -10   4  -2   -0.12    0.13
 -10   4  -2    0.00    0.14
  10   4   2    0.05    0.13
 -11  -4  -2   -0.02    0.15
  11  -4   2    0.12    0.16
  11  -4   2   -0.09    0.16
 -11   4  -2    0.27    0.16
 -11   4  -2   -0.01    0.16
  11   4   2    0.00    0.15
  12  -4   2    0.21    0.19
 -12  -4  -2   -0.06    0.16
  12  -4   2    0.08    0.17
 -12   4  -2    0.45    0.21
 -12   4  -2    0.18    0.17
  12   4   2    0.16    0.19
 -12  -5   2    6.63    0.44
  12  -5  -2    5.52    0.44
  12  -5  -2    7.01    0.48
 -12   5   2    6.68    0.48
  12   5  -2    6.90    0.47
  11  -5  -2    0.16    0.17
 -11  -5   2    0.24    0.17
  11  -5  -2    0.15    0.17
 -11   5   2    0.06    0.15
  11   5  -2    0.39    0.18
 -11   5   2    0.11    0.17
  10  -5  -2    0.32    0.18
 -10  -5   2    0.16    0.14
  10   5  -2    0.44    0.18
 -10   5   2    0.42    0.17
 -10   5   2    0.47    0.18
   9  -5  -2    0.07    0.14
  -9  -5   2    0.19    0.13
  -9  -5   2    0.19    0.13
  -9   5   2    0.14    0.13
   9   5  -2    0.22    0.15
  -9   5   2    0.16    0.15
   8  -5  -2    0.31    0.15
  -8  -5   2    0.30    0.14
  -8  -5   2   -0.02    0.10
  -8   5   2    0.29    0.12
   8   5  -2    0.20    0.13
  -8   5   2    0.36    0.15
  -7  -5   2   18.95    0.61
  -7  -5   2   19.03    0.63
   7  -5  -2   19.02    0.67
  -7   5   2   19.95    0.68
  -7   5   2   19.52    0.58
   7   5  -2   19.58    0.66
  -6  -5   2    5.53    0.30
   6  -5  -2    5.47    0.25
  -6  -5   2    5.37    0.28
   6  -5  -2    5.73    0.33
  -6   5   2    5.30    0.26
   6   5  -2    5.88    0.24
  -6   5   2    5.85    0.32
   6   5  -2    5.19    0.31
  -5  -5   2   34.11    0.92
   5  -5  -2   35.45    0.86
   5  -5  -2   33.95    0.95
  -5  -5   2   35.58    0.86
  -5   5   2   35.46    0.82
  -5   5   2   35.62    0.96
   5   5  -2   35.44    0.94
  -5   5   2   34.55    0.94
   5   5  -2   35.13    0.84
   4  -5  -2    3.18    0.23
  -4  -5   2    2.76    0.21
  -4  -5   2    2.98    0.17
   4  -5  -2    2.47    0.17
  -4   5   2    2.79    0.21
  -4   5   2    2.69    0.14
  -4   5   2    2.80    0.22
   4   5  -2    2.81    0.17
   4   5  -2    2.80    0.21
  -3  -5   2    0.19    0.10
   3  -5  -2    0.06    0.09
   3  -5  -2    0.37    0.10
  -3  -5   2    0.11    0.06
  -3   5   2    0.17    0.10
   3   5  -2    0.14    0.08
  -3   5   2    0.15    0.09
  -3   5   2    0.18    0.05
   3   5  -2    0.25    0.10
  -2  -5   2    0.59    0.12
   2  -5  -2    0.71    0.11
  -2  -5   2    0.67    0.07
   2   5  -2    0.82    0.13
  -2   5   2    0.62    0.12
  -2   5   2    1.03    0.15
   2   5  -2    0.64    0.11
   1  -5  -2   -0.06    0.07
  -1  -5   2   -0.04    0.07
   1   5  -2    0.07    0.07
  -1   5   2    0.09    0.08
   1   5  -2   -0.02    0.07
  -1   5   2    0.04    0.07
   0  -5   2   85.30    1.84
   0  -5  -2   81.82    1.85
   0   5   2   85.03    1.84
   0   5  -2   83.42    1.85
   0   5  -2   86.80    1.85
   0   5   2   80.98    1.83
   1  -5   2   12.09    0.40
   1  -5   2   11.86    0.42
  -1  -5  -2   12.09    0.28
  -1  -5  -2   12.65    0.43
  -1   5  -2   12.55    0.42
   1   5   2   11.93    0.40
   1   5   2   12.18    0.40
  -1   5  -2   12.58    0.42
   2  -5   2   30.54    0.82
  -2  -5  -2   30.75    0.81
  -2  -5  -2   30.26    0.68
   2  -5   2   30.40    0.77
  -2   5  -2   29.32    0.80
   2   5   2   29.88    0.79
  -2   5  -2   31.29    0.64
  -2   5  -2   31.75    0.82
   2   5   2   30.96    0.78
  -3  -5  -2   19.43    0.60
   3  -5   2   18.85    0.61
  -3  -5  -2   20.56    0.51
  -3   5  -2   20.19    0.61
  -3   5  -2   20.92    0.63
   3   5   2   20.63    0.59
   3   5   2   20.81    0.57
  -3   5  -2   19.62    0.47
   4  -5   2   13.97    0.41
  -4  -5  -2   12.72    0.46
  -4  -5  -2   12.77    0.40
   4  -5   2   13.15    0.49
   4   5   2   13.07    0.45
   4   5   2   13.98    0.43
  -4   5  -2   13.24    0.37
  -4   5  -2   13.02    0.47
  -5  -5  -2    1.02    0.14
  -5  -5  -2    0.57    0.14
   5  -5   2    0.63    0.15
   5  -5   2    0.72    0.11
   5   5   2    0.86    0.13
   5   5   2    0.68    0.14
  -5   5  -2    0.85    0.11
  -5   5  -2    0.77    0.15
   6  -5   2   52.19    1.35
  -6  -5  -2   53.37    1.25
   6  -5   2   50.79    1.16
  -6  -5  -2   53.31    1.29
  -6   5  -2   52.07    1.21
   6   5   2   51.88    1.22
   6   5   2   51.95    1.30
  -6   5  -2   52.24    1.34
  -7  -5  -2    3.08    0.25
  -7  -5  -2    3.63    0.25
   7  -5   2    3.05    0.31
  -7   5  -2    3.42    0.28
   7   5   2    3.68    0.22
  -7   5  -2    3.00    0.22
   7   5   2    3.34    0.26
   8  -5   2    0.29    0.16
  -8  -5  -2    0.10    0.13
  -8  -5  -2    0.22    0.12
   8   5   2    0.11    0.12
  -8   5  -2    0.32    0.13
  -8   5  -2    0.08    0.13
   9  -5   2   -0.06    0.13
  -9  -5  -2   -0.06    0.12
  -9  -5  -2    0.07    0.15
  -9   5  -2    0.03    0.11
  -9   5  -2   -0.16    0.13
   9   5   2    0.02    0.15
 -10  -5  -2    0.74    0.20
  10  -5   2    0.57    0.20
 -10   5  -2    0.62    0.20
  10   5   2    0.77    0.20
 -10   5  -2    0.50    0.17
 -11  -5  -2    3.40    0.37
  11  -5   2    3.55    0.38
  11  -5   2    2.83    0.36
 -11   5  -2    3.26    0.38
 -11   5  -2    3.89    0.36
  11   5   2    3.61    0.38
  12  -5   2    1.21    0.29
 -12  -5  -2    1.13    0.26
  12  -5   2    0.93    0.26
  12   5   2    1.01    0.26
 -12   5  -2    0.46    0.22
  11  -6  -2   -0.02    0.17
 -11  -6   2    0.19    0.17
 -11   6   2    0.32    0.20
  11   6  -2    0.12    0.19
 -10  -6   2    2.60    0.29
  10  -6  -2    3.36    0.39
 -10  -6   2    2.54    0.30
  10   6  -2    2.80    0.33
 -10   6   2    2.86    0.36
  -9  -6   2    0.00    0.12
  -9  -6   2   -0.10    0.14
   9  -6  -2    0.03    0.16
  -9   6   2    0.02    0.15
   9   6  -2    0.05    0.15
   8  -6  -2    1.65    0.26
  -8  -6   2    1.78    0.24
  -8  -6   2    1.83    0.23
  -8   6   2    1.51    0.24
   8   6  -2    2.23    0.28
  -7  -6   2    1.15    0.18
  -7  -6   2    1.04    0.19
   7  -6  -2    0.89    0.21
   7   6  -2    0.89    0.19
  -7   6   2    0.77    0.18
  -6  -6   2    0.29    0.14
  -6  -6   2    0.02    0.10
   6  -6  -2    0.12    0.10
   6  -6  -2   -0.01    0.14
   6   6  -2    0.19    0.15
  -6   6   2    0.12    0.12
   6   6  -2    0.12    0.10
   5  -6  -2    0.95    0.19
   5  -6  -2    0.93    0.15
  -5  -6   2    0.97    0.19
  -5  -6   2    0.81    0.14
   5   6  -2    0.91    0.14
  -5   6   2    0.59    0.16
   5   6  -2    0.80    0.18
  -5   6   2    0.70    0.17
   4  -6  -2   13.35    0.52
   4  -6  -2   12.93    0.45
  -4  -6   2   12.81    0.49
  -4  -6   2   13.55    0.40
   4   6  -2   13.05    0.43
   4   6  -2   13.57    0.49
  -4   6   2   12.75    0.51
  -4   6   2   13.24    0.49
   3  -6  -2   11.03    0.45
   3  -6  -2   11.28    0.41
  -3  -6   2   11.22    0.44
  -3  -6   2   11.07    0.32
   3   6  -2   10.94    0.39
  -3   6   2   10.92    0.43
   3   6  -2   11.15    0.43
  -3   6   2   11.18    0.45
  -2  -6   2    2.06    0.22
   2  -6  -2    1.73    0.19
  -2  -6   2    1.68    0.10
  -2   6   2    2.06    0.21
   2   6  -2    2.28    0.22
   2   6  -2    1.86    0.19
  -2   6   2    2.40    0.23
   1  -6  -2    1.74    0.19
  -1  -6   2    1.72    0.20
  -1   6   2    1.73    0.19
  -1   6   2    1.69    0.19
   1   6  -2    1.83    0.19
   1   6  -2    1.90    0.19
   0  -6   2   11.06    0.41
   0  -6   2    9.97    0.39
   0  -6  -2   11.02    0.42
   0   6  -2   10.80    0.40
   0   6   2   10.04    0.40
   0   6  -2   10.32    0.41
   0   6   2   10.22    0.39
  -1  -6  -2    2.50    0.21
   1  -6   2    2.44    0.19
   1  -6   2    2.52    0.21
   1   6   2    2.48    0.19
   1   6   2    2.73    0.21
  -1   6  -2    2.47    0.21
  -1   6  -2    2.18    0.22
   2  -6   2    0.20    0.12
  -2  -6  -2    0.19    0.05
   2  -6   2    0.46    0.12
  -2  -6  -2    0.30    0.12
   2   6   2    0.40    0.12
  -2   6  -2    0.28    0.12
  -2   6  -2    0.08    0.10
   2   6   2    0.36    0.11
  -3  -6  -2   21.44    0.53
   3  -6   2   21.38    0.68
  -3  -6  -2   20.58    0.66
   3  -6   2   21.32    0.62
   3   6   2   21.28    0.61
  -3   6  -2   22.10    0.69
   3   6   2   21.15    0.64
  -3   6  -2   20.80    0.67
  -4  -6  -2    3.09    0.18
  -4  -6  -2    2.84    0.23
   4  -6   2    3.12    0.21
   4  -6   2    2.70    0.27
  -4   6  -2    2.73    0.27
   4   6   2    2.98    0.23
  -4   6  -2    3.25    0.25
   4   6   2    2.75    0.21
   5  -6   2    7.76    0.32
  -5  -6  -2    7.20    0.37
   5  -6   2    7.65    0.41
  -5  -6  -2    7.01    0.30
   5   6   2    7.88    0.37
  -5   6  -2    8.00    0.40
   5   6   2    8.23    0.34
  -6  -6  -2    1.65    0.22
  -6  -6  -2    2.25    0.21
   6  -6   2    1.51    0.23
  -6   6  -2    2.01    0.25
   6   6   2    1.58    0.18
   6   6   2    1.64    0.22
   7  -6   2    5.60    0.38
  -7  -6  -2    6.05    0.32
  -7  -6  -2    5.38    0.34
   7   6   2    6.09    0.35
   7   6   2    5.77    0.35
  -7   6  -2    5.56    0.37
   8  -6   2    1.26    0.25
  -8  -6  -2    1.25    0.21
  -8  -6  -2    1.07    0.21
  -8   6  -2    1.39    0.25
   8   6   2    1.18    0.22
   9  -6   2    5.11    0.42
  -9  -6  -2    6.02    0.37
  -9  -6  -2    5.22    0.35
  -9   6  -2    5.52    0.40
   9   6   2    4.23    0.36
 -10  -6  -2    6.38    0.42
 -10   6  -2    6.03    0.44
  10   6   2    6.42    0.42
 -11  -6  -2    0.47    0.20
  11  -6   2    0.18    0.20
  11   6   2    0.08    0.20
 -11   6  -2    0.13    0.19
 -10  -7   2   -0.13    0.16
  10  -7  -2   -0.28    0.18
  10   7  -2    0.05    0.17
 -10   7   2    0.08    0.18
   9  -7  -2    3.37    0.39
  -9  -7   2    4.11    0.39
   9   7  -2    4.00    0.39
  -9   7   2    4.00    0.40
  -8  -7   2    1.42    0.24
   8  -7  -2    1.07    0.25
  -8   7   2    1.58    0.27
   8   7  -2    1.37    0.25
  -7  -7   2    6.62    0.39
   7  -7  -2    5.53    0.40
  -7   7   2    5.43    0.39
   7   7  -2    5.97    0.38
   6  -7  -2    2.29    0.23
   6  -7  -2    3.13    0.33
  -6  -7   2    2.64    0.29
  -6   7   2    2.15    0.27
   6   7  -2    2.62    0.30
  -5  -7   2   14.00    0.56
   5  -7  -2   13.31    0.49
   5  -7  -2   14.54    0.59
   5   7  -2   14.52    0.56
  -5   7   2   15.10    0.60
   5   7  -2   13.68    0.47
  -5   7   2   14.32    0.56
  -4  -7   2    7.64    0.40
   4  -7  -2    7.40    0.41
   4  -7  -2    7.92    0.36
   4   7  -2    7.99    0.39
   4   7  -2    7.20    0.34
  -4   7   2    7.37    0.40
  -4   7   2    7.74    0.39
   3  -7  -2    0.85    0.18
  -3  -7   2    1.13    0.19
   3  -7  -2    0.68    0.15
   3   7  -2    0.85    0.18
   3   7  -2    0.80    0.15
  -3   7   2    0.83    0.17
  -3   7   2    0.76    0.18
   2  -7  -2    0.99    0.18
  -2  -7   2    0.98    0.18
   2  -7  -2    1.19    0.18
  -2   7   2    0.96    0.17
   2   7  -2    0.82    0.17
   2   7  -2    0.73    0.15
  -2   7   2    0.83    0.17
   1  -7  -2    5.85    0.32
  -1  -7   2    5.51    0.32
  -1   7   2    5.67    0.31
   1   7  -2    5.94    0.32
   1   7  -2    5.75    0.30
  -1   7   2    5.33    0.33
   0  -7   2    2.61    0.25
   0  -7   2    2.46    0.25
   0  -7  -2    2.90    0.27
   0   7  -2    2.59    0.22
   0   7  -2    2.70    0.26
   0   7   2    2.68    0.23
   0   7   2    2.93    0.23
  -1  -7  -2    0.01    0.11
   1  -7   2    0.10    0.10
   1  -7   2    0.06    0.13
   1   7   2    0.01    0.09
   1   7   2   -0.16    0.10
  -1   7  -2    0.16    0.13
  -1   7  -2    0.09    0.11
  -2  -7  -2    4.58    0.30
   2  -7   2    4.81    0.31
   2  -7   2    4.96    0.29
  -2   7  -2    4.84    0.30
  -2   7  -2    4.33    0.30
   2   7   2    4.55    0.28
   2   7   2    4.92    0.29
   3  -7   2    1.16    0.20
   3  -7   2    1.43    0.19
  -3  -7  -2    1.64    0.22
  -3   7  -2    1.49    0.22
   3   7   2    1.30    0.19
   3   7   2    1.38    0.20
  -3   7  -2    1.26    0.21
   4  -7   2   45.77    1.23
   4  -7   2   44.55    1.12
  -4  -7  -2   43.03    1.19
   4   7   2   45.12    1.18
  -4   7  -2   44.43    1.20
   4   7   2   45.18    1.13
  -4   7  -2   43.83    1.22
  -5  -7  -2    9.34    0.44
   5  -7   2    9.45    0.47
   5  -7   2    8.55    0.37
   5   7   2    8.55    0.43
  -5   7  -2    9.39    0.46
   5   7   2    9.07    0.39
   6  -7   2    0.11    0.15
  -6  -7  -2    0.32    0.16
  -6   7  -2    0.06    0.14
   6   7   2    0.01    0.13
   6   7   2    0.06    0.11
   7  -7   2    3.36    0.38
  -7  -7  -2    3.45    0.33
  -7   7  -2    2.78    0.32
   7   7   2    3.49    0.34
  -8  -7  -2    1.08    0.22
   8  -7   2    1.25    0.26
  -8   7  -2    1.66    0.28
   8   7   2    1.63    0.27
   9  -7   2   11.77    0.62
  -9  -7  -2   10.43    0.52
   9   7   2    9.42    0.52
  -9   7  -2    9.19    0.54
  10  -7   2    0.27    0.22
  10   7   2    0.56    0.21
 -10   7  -2    0.33    0.20
   9  -8  -2    0.54    0.24
  -9  -8   2    0.24    0.21
  -9   8   2    0.33    0.22
   9   8  -2    0.56    0.22
  -8  -8   2    1.10    0.26
   8  -8  -2    0.98    0.28
  -8   8   2    1.03    0.24
   8   8  -2    1.01    0.24
   7  -8  -2    0.13    0.18
  -7  -8   2    0.24    0.17
  -7   8   2    0.15    0.18
   7   8  -2    0.11    0.16
   6  -8  -2    2.48    0.32
  -6  -8   2    3.18    0.35
  -6   8   2    3.42    0.35
   6   8  -2    3.27    0.35
   5  -8  -2    1.65    0.22
   5  -8  -2    2.01    0.28
  -5  -8   2    1.82    0.26
  -5   8   2    1.71    0.27
   5   8  -2    1.60    0.24
  -5   8   2    2.44    0.30
   4  -8  -2   10.39    0.52
   4  -8  -2    9.26    0.42
  -4  -8   2    9.71    0.48
  -4   8   2    9.59    0.46
   4   8  -2    9.37    0.41
  -4   8   2    9.79    0.51
   4   8  -2    9.19    0.46
  -3  -8   2    0.41    0.16
   3  -8  -2    0.58    0.19
   3  -8  -2    0.68    0.16
  -3   8   2    0.44    0.17
   3   8  -2    0.55    0.17
   3   8  -2    0.61    0.16
  -3   8   2    0.43    0.16
   2  -8  -2    4.20    0.31
  -2  -8   2    4.12    0.31
   2  -8  -2    4.62    0.33
  -2   8   2    4.28    0.31
   2   8  -2    4.66    0.32
  -2   8   2    4.32    0.32
   2   8  -2    4.16    0.29
   1  -8  -2   10.92    0.48
   1  -8  -2   11.30    0.49
  -1  -8   2   10.58    0.48
  -1  -8   2   11.23    0.47
   1   8  -2   11.69    0.48
   1   8  -2   10.85    0.48
  -1   8   2   11.04    0.49
  -1   8   2   11.58    0.49
   0  -8   2    0.67    0.17
   0  -8  -2    0.92    0.19
   0  -8   2    0.70    0.17
   0   8  -2    0.53    0.16
   0   8   2    0.84    0.19
   0   8  -2    0.56    0.16
   0   8   2    0.67    0.17
  -1  -8  -2   15.01    0.60
   1  -8   2   16.17    0.59
   1  -8   2   15.62    0.60
  -1   8  -2   15.63    0.60
   1   8   2   15.95    0.59
  -1   8  -2   16.64    0.62
   1   8   2   16.32    0.59
  -2  -8  -2    3.33    0.32
   2  -8   2    3.06    0.32
   2  -8   2    2.94    0.28
  -2   8  -2    3.76    0.32
   2   8   2    3.66    0.27
   2   8   2    3.15    0.27
  -2   8  -2    3.92    0.30
   3  -8   2    4.36    0.29
  -3  -8  -2    3.56    0.30
   3  -8   2    3.94    0.37
  -3   8  -2    3.73    0.31
   3   8   2    4.24    0.30
  -3   8  -2    5.20    0.37
   3   8   2    3.85    0.29
  -4  -8  -2    0.32    0.16
   4  -8   2    0.41    0.20
   4  -8   2    0.23    0.14
   4   8   2    0.46    0.15
  -4   8  -2    0.21    0.17
   4   8   2    0.24    0.14
   5  -8   2    0.28    0.17
   5  -8   2    0.29    0.14
  -5  -8  -2    0.29    0.16
   5   8   2    0.49    0.15
   5   8   2    0.16    0.16
  -5   8  -2    0.36    0.18
   6  -8   2    0.73    0.23
  -6  -8  -2    0.45    0.18
   6   8   2    0.49    0.18
  -6   8  -2    0.20    0.17
  -7  -8  -2    0.29    0.16
   7  -8   2    0.34    0.22
   7   8   2    0.22    0.17
  -7   8  -2    0.24    0.17
  -8  -8  -2    5.66    0.42
   8  -8   2    6.14    0.49
   8   8   2    5.55    0.40
  -8   8  -2    6.58    0.45
  -9  -8  -2   -0.30    0.15
   9  -8   2   -0.14    0.18
   9   8   2   -0.10    0.16
  -9   8  -2    0.14    0.19
   8  -9  -2    2.43    0.37
  -8  -9   2    3.11    0.38
   8   9  -2    3.07    0.39
  -8   9   2    3.31    0.39
  -7  -9   2    7.31    0.48
   7  -9  -2    8.37    0.54
  -7   9   2    7.94    0.50
   7   9  -2    9.04    0.53
  -6  -9   2    0.97    0.24
   6  -9  -2    1.45    0.30
  -6   9   2    0.93    0.24
   6   9  -2    1.31    0.25
   5  -9  -2    5.07    0.35
   5  -9  -2    5.14    0.41
  -5  -9   2    4.86    0.38
  -5   9   2    4.84    0.40
   5   9  -2    5.48    0.39
  -5   9   2    4.92    0.38
   4  -9  -2    3.00    0.35
  -4  -9   2    2.74    0.33
   4  -9  -2    2.72    0.30
  -4   9   2    2.47    0.32
   4   9  -2    2.66    0.33
  -4   9   2    2.36    0.32
   3  -9  -2    3.68    0.38
  -3  -9   2    3.92    0.38
   3  -9  -2    4.19    0.33
  -3   9   2    3.84    0.39
  -3   9   2    3.79    0.32
   3   9  -2    3.96    0.31
   3   9  -2    4.10    0.38
   2  -9  -2    2.25    0.27
   2  -9  -2    2.75    0.32
  -2  -9   2    2.20    0.27
  -2  -9   2    2.46    0.30
   2   9  -2    1.80    0.27
   2   9  -2    2.30    0.27
  -2   9   2    1.83    0.27
  -2   9   2    2.66    0.32
   1  -9  -2    1.42    0.24
  -1  -9   2    1.05    0.22
  -1  -9   2    1.07    0.22
   1  -9  -2    1.17    0.23
  -1   9   2    1.43    0.23
   1   9  -2    1.78    0.26
  -1   9   2    2.01    0.27
   1   9  -2    0.81    0.20
   0  -9  -2    7.19    0.42
   0  -9   2    7.88    0.43
   0  -9   2    7.80    0.43
   0   9  -2    7.52    0.42
   0   9   2    7.02    0.40
   0   9  -2    7.84    0.43
   0   9   2    7.87    0.43
   1  -9   2    0.09    0.15
  -1  -9  -2    0.02    0.15
   1  -9   2    0.03    0.14
  -1   9  -2    0.03    0.16
   1   9   2    0.24    0.14
   1   9   2    0.06    0.15
  -1   9  -2    0.09    0.15
   2  -9   2   13.89    0.60
   2  -9   2   13.95    0.57
  -2  -9  -2   12.78    0.58
  -2   9  -2   14.02    0.61
   2   9   2   13.77    0.58
  -2   9  -2   15.55    0.63
   2   9   2   14.91    0.58
   3  -9   2    0.73    0.21
   3  -9   2    0.68    0.19
  -3  -9  -2    0.60    0.20
  -3   9  -2    0.60    0.20
   3   9   2    0.88    0.20
  -3   9  -2    0.66    0.20
   3   9   2    0.76    0.20
  -4  -9  -2    1.53    0.26
   4  -9   2    1.74    0.29
   4  -9   2    2.04    0.26
   4   9   2    2.08    0.26
  -4   9  -2    1.66    0.27
   4   9   2    1.84    0.28
   5  -9   2    0.11    0.20
  -5  -9  -2    0.03    0.15
  -5   9  -2    0.27    0.17
   5   9   2    0.09    0.17
   6  -9   2    0.51    0.22
  -6  -9  -2    0.81    0.22
  -6   9  -2    0.53    0.20
   6   9   2    1.03    0.25
  -7  -9  -2    4.89    0.40
   7  -9   2    4.15    0.45
   7   9   2    4.58    0.38
  -7   9  -2    5.42    0.45
  -8  -9  -2    2.30    0.33
   8  -9   2    2.05    0.34
   8   9   2    1.80    0.30
  -8   9  -2    2.90    0.38
  -6 -10   2    0.48    0.22
   6 -10  -2    0.45    0.23
  -6  10   2    0.33    0.21
   6  10  -2    0.48    0.24
   5 -10  -2   -0.02    0.18
  -5 -10   2   -0.11    0.16
  -5  10   2    0.18    0.19
  -5  10   2    0.14    0.17
   5  10  -2    0.12    0.18
   4 -10  -2    0.33    0.17
  -4 -10   2    0.28    0.19
   4 -10  -2    0.11    0.18
  -4  10   2    0.27    0.20
  -4  10   2    0.40    0.19
   4  10  -2    0.36    0.19
  -3 -10   2    0.21    0.19
   3 -10  -2    0.08    0.14
   3 -10  -2    0.15    0.18
  -3  10   2    0.19    0.17
   3  10  -2   -0.06    0.16
  -3  10   2   -0.03    0.16
  -2 -10   2    2.01    0.27
   2 -10  -2    2.07    0.30
   2 -10  -2    1.89    0.30
  -2 -10   2    1.77    0.29
   2  10  -2    1.56    0.28
  -2  10   2    2.05    0.31
   2  10  -2    2.16    0.29
  -2  10   2    1.89    0.28
   1 -10  -2    4.13    0.39
  -1 -10   2    4.09    0.39
  -1 -10   2    3.77    0.39
   1 -10  -2    3.79    0.39
  -1  10   2    4.11    0.40
   1  10  -2    3.60    0.38
  -1  10   2    4.24    0.35
   1  10  -2    3.74    0.36
   0 -10  -2    0.00    0.15
   0 -10   2    0.22    0.17
   0 -10  -2    0.10    0.18
   0 -10   2    0.30    0.19
   0  10  -2    0.25    0.17
   0  10  -2    0.13    0.16
   0  10   2   -0.04    0.17
   0  10   2    0.08    0.15
   1 -10   2    0.62    0.20
  -1 -10  -2    0.58    0.21
  -1 -10  -2    0.25    0.19
   1 -10   2    0.35    0.18
  -1  10  -2    0.35    0.19
   1  10   2    0.69    0.20
   1  10   2    0.43    0.21
  -1  10  -2    0.78    0.22
   2 -10   2    0.40    0.17
  -2 -10  -2    0.30    0.19
   2 -10   2    0.08    0.19
  -2  10  -2    0.19    0.20
   2  10   2    0.33    0.17
   2  10   2    0.46    0.19
  -2  10  -2    0.33    0.18
  -3 -10  -2    0.65    0.22
   3 -10   2    1.10    0.25
   3 -10   2    0.77    0.21
  -3  10  -2    0.62    0.22
   3  10   2    0.88    0.22
   3  10   2    0.83    0.22
  -3  10  -2    0.95    0.24
   4 -10   2    0.33    0.20
  -4 -10  -2    0.19    0.19
   4 -10   2    0.36    0.18
  -4  10  -2    0.19    0.18
   4  10   2    0.44    0.19
   5 -10   2    0.08    0.21
  -5 -10  -2    0.25    0.19
  -5  10  -2    0.27    0.20
   5  10   2    0.19    0.18
  -6 -10  -2    0.09    0.18
   6 -10   2   -0.10    0.20
  -6  10  -2    0.14    0.19
   6  10   2    0.32    0.20
  -3 -11   2    0.43    0.22
   3 -11  -2    0.30    0.19
   3 -11  -2    0.22    0.21
   3  11  -2    0.25    0.19
  -3  11   2    0.28    0.19
  -3  11   2    0.20    0.21
   2 -11  -2   -0.16    0.18
  -2 -11   2   -0.08    0.16
   2 -11  -2   -0.05    0.17
  -2  11   2   -0.10    0.17
  -2  11   2   -0.11    0.15
   2  11  -2    0.08    0.17
   2  11  -2   -0.06    0.19
  -1 -11   2    0.43    0.21
   1 -11  -2    0.42    0.20
  -1 -11   2    0.70    0.24
   1 -11  -2    0.51    0.21
  -1  11   2    0.49    0.22
   1  11  -2    0.37    0.21
  -1  11   2    0.47    0.23
   1  11  -2    0.27    0.19
   0 -11   2    0.20    0.20
   0 -11   2    0.10    0.20
   0 -11  -2    0.11    0.18
   0 -11  -2    0.27    0.20
   0  11   2    0.06    0.17
   0  11  -2    0.08    0.19
   0  11   2    0.18    0.20
   0  11  -2    0.11    0.18
  -1 -11  -2    0.26    0.19
   1 -11   2   -0.04    0.15
  -1 -11  -2   -0.28    0.18
   1 -11   2    0.15    0.19
  -1  11  -2   -0.13    0.16
  -1  11  -2    0.07    0.20
   1  11   2    0.03    0.16
   1  11   2    0.12    0.19
   2 -11   2    0.87    0.22
   2 -11   2    0.50    0.24
  -2 -11  -2    0.51    0.22
  -2 -11  -2    0.47    0.23
  -2  11  -2    0.79    0.26
  -2  11  -2    0.47    0.22
   2  11   2    0.59    0.23
   2  11   2    0.72    0.24
   3 -11   2   -0.04    0.15
   3 -11   2   -0.02    0.21
  -3 -11  -2   -0.35    0.16
   3  11   2   -0.04    0.18
  -3  11  -2    0.28    0.20
 -13   0   3   -0.07    0.15
  13   0  -3   -0.16    0.16
 -12   0   3    0.43    0.19
  12   0  -3    0.00    0.15
 -11   0   3    0.34    0.15
  11   0  -3    0.07    0.14
  10   0  -3    0.03    0.12
 -10   0   3    0.00    0.13
  10   0  -3    0.04    0.11
   9   0  -3   -0.09    0.08
  -9   0   3    0.01    0.11
   9   0  -3    0.11    0.12
   8   0  -3   -0.08    0.08
  -8   0   3    0.07    0.10
   8   0  -3    0.11    0.10
  -8   0   3    0.03    0.06
   7   0  -3    0.03    0.07
  -7   0   3    0.03    0.05
  -7   0   3   -0.01    0.09
   7   0  -3    0.04    0.08
  -6   0   3   -0.04    0.07
  -6   0   3    0.01    0.04
   6   0  -3    0.07    0.06
   6   0  -3    0.04    0.06
  -6   0   3   -0.01    0.06
  -5   0   3   -0.10    0.08
  -5   0   3    0.07    0.08
  -5   0   3   -0.06    0.05
   5   0  -3    0.13    0.08
   5   0  -3   -0.05    0.06
  -4   0   3    0.18    0.07
  -4   0   3   -0.08    0.06
   4   0  -3   -0.03    0.04
   4   0  -3    0.09    0.06
  -4   0   3    0.07    0.04
   3   0  -3    0.00    0.03
  -3   0   3   -0.04    0.04
  -3   0   3    0.01    0.03
   3   0  -3    0.02    0.04
  -3   0   3   -0.07    0.04
   2   0  -3   -0.55    0.03
   2   0  -3   -0.53    0.03
  -2   0   3   -0.50    0.04
  -2   0   3   -0.49    0.03
   2   0  -3   -0.53    0.04
  -2   0   3   -0.43    0.04
  -2   0   3   -0.46    0.04
  -1   0   3   -0.19    0.02
   1   0  -3   -0.23    0.01
  -1   0   3   -0.21    0.02
   1   0  -3   -0.20    0.02
   0   0   3   -0.04    0.01
   0   0   3   -0.06    0.01
   0   0  -3   -0.04    0.01
   0   0  -3   -0.03    0.02
   0   0  -3   -0.08    0.01
   0   0   3   -0.04    0.01
   0   0  -3   -0.07    0.02
  -1   0  -3    0.03    0.01
   1   0   3   -0.01    0.03
   1   0   3    0.01    0.01
  -1   0  -3    0.01    0.02
  -1   0  -3    0.07    0.03
   2   0   3   -0.04    0.02
  -2   0  -3   -0.04    0.02
  -2   0  -3   -0.05    0.03
  -2   0  -3   -0.06    0.03
  -2   0  -3   -0.01    0.02
   2   0   3   -0.03    0.04
  -3   0  -3   -0.04    0.02
   3   0   3   -0.04    0.04
  -3   0  -3   -0.09    0.04
   3   0   3    0.01    0.02
  -3   0  -3    0.00    0.05
   3   0   3    0.08    0.06
   4   0   3   -0.01    0.05
  -4   0  -3    0.08    0.06
  -4   0  -3   -0.01    0.02
  -4   0  -3   -0.01    0.05
   4   0   3    0.00    0.05
   5   0   3    0.00    0.06
   5   0   3    0.07    0.07
  -5   0  -3    0.03    0.03
  -5   0  -3    0.05    0.07
  -5   0  -3   -0.03    0.06
   6   0   3    0.02    0.07
  -6   0  -3    0.08    0.08
  -6   0  -3   -0.08    0.03
   6   0   3   -0.02    0.06
  -6   0  -3    0.00    0.08
  -7   0  -3    0.07    0.10
   7   0   3   -0.03    0.09
  -7   0  -3   -0.06    0.08
   7   0   3    0.00    0.07
  -8   0  -3    0.05    0.11
   8   0   3   -0.06    0.09
   8   0   3    0.18    0.11
  -8   0  -3    0.00    0.10
  -9   0  -3    0.02    0.12
   9   0   3   -0.08    0.09
   9   0   3   -0.09    0.11
  10   0   3    0.01    0.11
  10   0   3    0.07    0.12
 -10   0  -3    0.07    0.13
 -11   0  -3   -0.33    0.11
  11   0   3   -0.09    0.14
  11   0   3    0.02    0.11
 -12   0  -3   -0.16    0.13
  12   0   3    0.18    0.17
 -13   0  -3   -0.19    0.18
  13   0   3    0.20    0.21
  13  -1  -3    1.95    0.31
 -13  -1   3    1.88    0.31
  13   1  -3    1.54    0.29
 -13   1   3    2.28    0.33
  12  -1  -3    0.25    0.17
 -12  -1   3    0.54    0.20
 -12   1   3    0.37    0.18
  12   1  -3    0.62    0.21
 -11  -1   3    9.36    0.49
  11  -1  -3   10.21    0.51
 -11   1   3    9.68    0.49
  11   1  -3    9.71    0.50
 -10  -1   3   19.46    0.68
  10  -1  -3   19.55    0.69
  10  -1  -3   17.76    0.60
 -10   1   3   17.73    0.65
  10   1  -3   17.88    0.67
   9  -1  -3   13.57    0.54
  -9  -1   3   13.34    0.53
   9  -1  -3   14.69    0.49
   9   1  -3   14.34    0.45
  -9   1   3   13.46    0.52
  -9   1   3   14.06    0.55
   9   1  -3   14.08    0.54
  -8  -1   3    2.60    0.24
  -8  -1   3    2.48    0.16
   8  -1  -3    2.78    0.20
   8  -1  -3    2.01    0.22
   8   1  -3    2.75    0.25
  -8   1   3    2.72    0.26
  -8   1   3    2.51    0.23
   8   1  -3    2.58    0.17
   7  -1  -3   32.75    0.81
  -7  -1   3   30.44    0.84
  -7  -1   3   32.82    0.77
   7  -1  -3   31.63    0.86
  -7   1   3   30.51    0.86
  -7   1   3   32.66    0.73
   7   1  -3   32.05    0.86
   7   1  -3   33.24    0.77
  -7   1   3   32.12    0.85
  -6  -1   3    0.00    0.07
  -6  -1   3   -0.02    0.05
   6  -1  -3    0.07    0.07
   6  -1  -3    0.13    0.08
  -6   1   3    0.07    0.04
  -6   1   3    0.10    0.08
  -6   1   3    0.07    0.08
   6   1  -3   -0.03    0.07
   6   1  -3    0.04    0.05
   5  -1  -3    0.15    0.07
  -5  -1   3    0.08    0.07
   5  -1  -3    0.16    0.07
  -5  -1   3    0.16    0.06
  -5   1   3    0.08    0.07
   5   1  -3    0.06    0.07
   5   1  -3    0.12    0.05
  -5   1   3    0.27    0.08
  -5   1   3    0.12    0.05
  -4  -1   3   94.54    1.93
  -4  -1   3   91.96    1.96
   4  -1  -3   94.50    1.94
  -4   1   3   93.27    1.90
   4   1  -3   93.82    1.97
  -4   1   3   92.22    1.95
   4   1  -3   94.25    1.89
  -4   1   3   93.06    1.97
  -3  -1   3   91.82    1.91
  -3  -1   3   93.58    1.90
   3  -1  -3   90.78    1.90
  -3   1   3   93.77    1.87
   3   1  -3   89.14    1.91
  -3   1   3   92.54    1.91
   3   1  -3   93.95    1.85
  -3   1   3   94.03    1.92
  -3   1   3   93.84    1.90
  -2  -1   3  196.66    3.86
  -2  -1   3  194.35    3.88
  -2  -1   3  192.74    3.88
   2   1  -3  194.45    3.85
  -2   1   3  196.14    3.89
  -2   1   3  194.52    3.87
   2   1  -3  196.69    3.89
  -2   1   3  196.54    3.87
  -2   1   3  193.99    3.88
  -1  -1   3   35.33    0.72
  -1  -1   3   34.76    0.76
  -1  -1   3   35.78    0.72
  -1  -1   3   35.56    0.74
   1   1  -3   35.70    0.72
  -1   1   3   35.97    0.74
   1   1  -3   35.49    0.75
  -1   1   3   34.94    0.75
  -1   1   3   35.40    0.74
  -1   1   3   35.43    0.75
   0  -1   3  628.38   12.55
   0  -1  -3  621.21   12.59
   0  -1  -3  625.09   12.55
   0  -1  -3  632.92   12.49
   0  -1   3  639.02   12.62
   0   1  -3  634.80   12.53
   0   1   3  637.25   12.50
   0   1  -3  640.36   12.64
   0   1   3  638.07   12.66
   0   1   3  615.25   12.56
   1  -1   3   24.34    0.51
  -1  -1  -3   24.35    0.54
   1  -1   3   24.12    0.55
  -1  -1  -3   24.43    0.54
  -1   1  -3   24.78    0.53
   1   1   3   23.67    0.54
  -1   1  -3   25.63    0.53
   1   1   3   24.87    0.53
  -1   1  -3   24.52    0.54
   2  -1   3  566.96   11.07
  -2  -1  -3  565.64   11.24
   2  -1   3  550.64   11.33
  -2  -1  -3  572.16   11.30
  -2   1  -3  557.30   11.38
   2   1   3  555.38   11.32
  -2   1  -3  561.44   11.34
  -2   1  -3  577.22   11.07
   2   1   3  553.57   11.36
   3  -1   3   20.54    0.51
  -3  -1  -3   19.83    0.46
  -3  -1  -3   20.44    0.51
   3   1   3   19.79    0.49
   3   1   3   20.86    0.50
  -3   1  -3   20.52    0.51
  -3   1  -3   20.23    0.51
  -4  -1  -3    0.92    0.07
  -4  -1  -3    0.82    0.11
   4  -1   3    1.04    0.12
  -4   1  -3    1.06    0.12
   4   1   3    1.04    0.11
  -4   1  -3    1.10    0.11
   4   1   3    0.94    0.10
   5  -1   3   17.46    0.51
  -5  -1  -3   17.73    0.43
  -5  -1  -3   17.85    0.52
   5   1   3   18.22    0.51
  -5   1  -3   17.91    0.52
  -5   1  -3   17.93    0.51
   5   1   3   18.33    0.49
  -6  -1  -3    0.19    0.05
   6  -1   3    0.08    0.08
  -6  -1  -3    0.07    0.08
   6  -1   3    0.13    0.08
  -6   1  -3    0.23    0.09
  -6   1  -3    0.14    0.08
   6   1   3    0.11    0.07
   6   1   3    0.05    0.08
   7  -1   3   53.39    1.28
  -7  -1  -3   53.53    1.15
  -7  -1  -3   52.73    1.30
   7  -1   3   54.68    1.31
  -7   1  -3   53.40    1.30
   7   1   3   54.22    1.25
   7   1   3   51.66    1.28
  -7   1  -3   54.90    1.31
   8  -1   3    5.62    0.32
  -8  -1  -3    5.38    0.31
   8  -1   3    5.05    0.30
   8   1   3    5.53    0.31
  -8   1  -3    5.40    0.31
  -8   1  -3    5.51    0.32
   8   1   3    5.53    0.28
   9  -1   3    9.92    0.45
   9  -1   3    8.93    0.41
  -9  -1  -3    9.92    0.45
   9   1   3    9.50    0.39
  -9   1  -3    9.68    0.44
   9   1   3    9.42    0.44
  -9   1  -3    9.69    0.45
  10  -1   3    5.35    0.36
 -10  -1  -3    5.52    0.36
  10  -1   3    6.12    0.35
 -10   1  -3    6.32    0.39
  10   1   3    5.82    0.36
  10   1   3    6.13    0.33
 -10   1  -3    6.00    0.38
 -11  -1  -3    6.48    0.41
  11  -1   3    5.78    0.37
  11  -1   3    6.28    0.40
 -11   1  -3    5.86    0.39
  11   1   3    5.68    0.39
  12  -1   3    7.14    0.47
  12  -1   3    9.04    0.51
 -12  -1  -3    7.04    0.46
 -12   1  -3    7.72    0.47
  12   1   3    7.46    0.49
  13  -1   3    0.03    0.20
 -13  -1  -3   -0.07    0.17
 -13   1  -3   -0.32    0.14
  13   1   3    0.17    0.19
 -13  -2   3    2.35    0.33
  13  -2  -3    1.92    0.33
 -13   2   3    2.19    0.32
  13   2  -3    1.56    0.30
 -12  -2   3    0.10    0.16
  12  -2  -3    0.17    0.16
 -12   2   3    0.01    0.14
  12   2  -3    0.07    0.18
  11  -2  -3    0.34    0.17
  11  -2  -3    0.96    0.20
 -11  -2   3    0.63    0.19
  11   2  -3    0.75    0.22
 -11   2   3    0.37    0.17
 -11   2   3    0.77    0.21
 -10  -2   3    0.21    0.14
  10  -2  -3    0.02    0.13
  10  -2  -3   -0.05    0.12
 -10   2   3   -0.22    0.11
 -10   2   3    0.06    0.14
  10   2  -3    0.02    0.13
  -9  -2   3    1.42    0.16
   9  -2  -3    1.19    0.20
   9  -2  -3    1.26    0.19
  -9  -2   3    1.16    0.20
  -9   2   3    1.14    0.19
  -9   2   3    1.05    0.20
   9   2  -3    1.07    0.19
   8  -2  -3    0.33    0.12
  -8  -2   3    0.36    0.10
   8  -2  -3    0.48    0.14
  -8  -2   3    0.51    0.14
  -8   2   3    0.38    0.14
  -8   2   3    0.49    0.14
   8   2  -3    0.62    0.10
   8   2  -3    0.73    0.16
   7  -2  -3    2.87    0.21
  -7  -2   3    2.24    0.21
   7  -2  -3    2.63    0.21
  -7  -2   3    2.86    0.18
   7  -2  -3    2.89    0.14
   7   2  -3    3.08    0.16
   7   2  -3    2.67    0.21
  -7   2   3    2.67    0.21
  -7   2   3    2.89    0.13
  -7   2   3    2.86    0.20
   6  -2  -3   38.25    0.85
   6  -2  -3   38.41    0.94
  -6  -2   3   37.85    0.91
  -6  -2   3   37.77    0.95
  -6   2   3   40.62    0.99
  -6   2   3   37.70    0.93
   6   2  -3   38.75    0.97
   6   2  -3   39.29    0.86
  -6   2   3   38.06    0.84
  -5  -2   3    1.23    0.13
   5  -2  -3    1.24    0.09
   5  -2  -3    1.28    0.14
  -5  -2   3    1.61    0.13
   5   2  -3    1.64    0.09
  -5   2   3    1.04    0.08
  -5   2   3    1.15    0.14
   5   2  -3    1.18    0.14
  -5   2   3    1.17    0.12
   4  -2  -3    6.22    0.24
  -4  -2   3    5.70    0.23
   4  -2  -3    6.11    0.20
  -4  -2   3    6.03    0.23
  -4   2   3    6.17    0.19
   4   2  -3    5.68    0.17
   4   2  -3    6.39    0.24
  -4   2   3    5.91    0.22
  -4   2   3    6.11    0.24
  -4   2   3    5.73    0.24
  -3  -2   3   64.43    1.34
  -3  -2   3   61.76    1.34
   3  -2  -3   63.10    1.36
   3  -2  -3   62.88    1.31
  -3   2   3   62.80    1.35
  -3   2   3   62.05    1.35
  -3   2   3   62.45    1.31
  -3   2   3   62.75    1.32
   3   2  -3   62.97    1.36
   3   2  -3   62.86    1.28
   2  -2  -3  331.92    6.71
  -2  -2   3  337.30    6.64
  -2  -2   3  334.15    6.67
  -2   2   3  337.62    6.68
  -2   2   3  339.99    6.69
   2   2  -3  335.85    6.71
   2   2  -3  344.73    6.68
  -2   2   3  329.83    6.75
  -2   2   3  337.40    6.66
   1  -2  -3    0.82    0.08
  -1  -2   3    0.72    0.08
  -1  -2   3    0.73    0.05
   1  -2  -3    0.64    0.05
   1   2  -3    0.77    0.06
  -1   2   3    0.78    0.08
  -1   2   3    0.76    0.07
  -1   2   3    0.68    0.04
   1   2  -3    0.78    0.08
   0  -2   3    2.11    0.11
   0  -2  -3    2.11    0.08
   0  -2   3    2.07    0.10
   0  -2  -3    2.29    0.11
   0   2  -3    2.44    0.12
   0   2   3    1.95    0.11
   0   2   3    2.33    0.10
   0   2  -3    2.32    0.08
   0   2  -3    2.14    0.10
   1  -2   3    8.20    0.23
  -1  -2  -3    8.94    0.26
  -1  -2  -3    8.19    0.22
   1  -2   3    8.42    0.25
  -1   2  -3    8.16    0.21
   1   2   3    7.73    0.23
  -1   2  -3    8.24    0.25
   1   2   3    8.08    0.24
   2  -2   3  318.13    6.31
   2  -2   3  321.53    6.35
  -2  -2  -3  320.87    6.31
  -2  -2  -3  320.18    6.33
  -2   2  -3  311.24    6.34
   2   2   3  320.90    6.32
   2   2   3  319.03    6.32
  -2   2  -3  319.82    6.36
   3  -2   3    4.13    0.19
  -3  -2  -3    4.20    0.18
  -3  -2  -3    4.00    0.17
   3  -2   3    4.16    0.12
   3   2   3    4.00    0.17
  -3   2  -3    3.86    0.18
  -3   2  -3    3.97    0.17
   3   2   3    4.17    0.17
   4  -2   3   32.28    0.80
  -4  -2  -3   32.81    0.75
   4  -2   3   32.42    0.66
  -4  -2  -3   31.82    0.78
  -4   2  -3   32.11    0.79
   4   2   3   32.26    0.76
   4   2   3   31.79    0.77
  -4   2  -3   31.94    0.77
   5  -2   3   52.90    1.24
  -5  -2  -3   53.37    1.23
  -5  -2  -3   53.37    1.17
   5   2   3   53.74    1.19
   5   2   3   53.55    1.22
  -5   2  -3   53.09    1.21
  -5   2  -3   53.02    1.24
  -6  -2  -3    1.55    0.17
  -6  -2  -3    1.81    0.14
   6  -2   3    1.81    0.19
  -6   2  -3    1.83    0.18
  -6   2  -3    1.90    0.19
   6   2   3    2.18    0.16
   6   2   3    2.00    0.19
   7  -2   3    8.49    0.38
  -7  -2  -3    8.24    0.29
  -7  -2  -3    8.36    0.37
   7   2   3    8.79    0.33
  -7   2  -3    9.46    0.38
  -7   2  -3    8.17    0.37
   7   2   3    8.34    0.36
  -8  -2  -3   28.10    0.84
  -8  -2  -3   29.58    0.76
   8  -2   3   28.98    0.84
   8  -2   3   29.41    0.86
   8   2   3   28.21    0.83
  -8   2  -3   30.77    0.87
  -8   2  -3   28.79    0.84
   8   2   3   28.55    0.78
   9  -2   3    0.79    0.17
   9  -2   3    1.50    0.22
  -9  -2  -3    1.13    0.20
   9   2   3    1.26    0.20
  -9   2  -3    1.10    0.20
   9   2   3    1.26    0.17
  -9   2  -3    0.78    0.17
 -10  -2  -3    2.27    0.29
  10  -2   3    2.59    0.30
  10  -2   3    2.76    0.30
 -10   2  -3    2.31    0.28
  10   2   3    2.83    0.24
 -10   2  -3    2.09    0.27
  10   2   3    2.35    0.28
  11  -2   3    0.28    0.17
  11  -2   3    0.49    0.19
 -11  -2  -3    0.51    0.18
 -11   2  -3    0.49    0.19
  11   2   3    0.44    0.19
 -11   2  -3    0.57    0.20
  12  -2   3    1.32    0.27
 -12  -2  -3    1.34    0.25
  12  -2   3    1.20    0.25
  12   2   3    1.41    0.28
 -12   2  -3    0.75    0.22
 -12   2  -3    1.08    0.25
 -13  -2  -3    0.59    0.22
  13  -2   3    0.87    0.25
 -13   2  -3    0.79    0.24
  13   2   3    0.56    0.24
 -13  -3   3    0.47    0.21
  13  -3  -3    0.60    0.23
  13   3  -3    0.56    0.22
 -13   3   3    0.97    0.24
 -13   3   3    0.44    0.21
  12  -3  -3    0.17    0.17
 -12  -3   3   -0.08    0.15
  12  -3  -3    0.20    0.16
 -12   3   3    0.31    0.19
  12   3  -3    0.20    0.19
 -12   3   3    0.13    0.16
  11  -3  -3    7.08    0.41
 -11  -3   3    7.17    0.43
  11  -3  -3    8.17    0.46
 -11   3   3    8.14    0.47
  11   3  -3    6.23    0.42
 -11   3   3    7.47    0.43
  10  -3  -3    3.16    0.31
  10  -3  -3    2.57    0.30
 -10  -3   3    2.93    0.31
  10   3  -3    2.66    0.30
 -10   3   3    3.23    0.30
 -10   3   3    2.90    0.31
  -9  -3   3    6.61    0.31
   9  -3  -3    5.86    0.35
   9  -3  -3    6.13    0.36
  -9  -3   3    6.29    0.35
  -9   3   3    6.32    0.35
   9   3  -3    5.68    0.35
  -9   3   3    5.90    0.36
  -8  -3   3    0.39    0.14
  -8  -3   3    0.36    0.11
   8  -3  -3    0.47    0.15
   8   3  -3    0.37    0.14
  -8   3   3    0.34    0.12
  -8   3   3    0.73    0.17
   7  -3  -3    9.72    0.40
   7  -3  -3    9.33    0.29
  -7  -3   3    9.06    0.35
  -7  -3   3    9.55    0.39
   7   3  -3    9.67    0.40
   7   3  -3    9.48    0.30
  -7   3   3    9.29    0.40
  -7   3   3    9.34    0.37
  -6  -3   3    0.12    0.08
  -6  -3   3    0.10    0.09
   6  -3  -3    0.07    0.10
   6  -3  -3    0.12    0.06
  -6   3   3    0.04    0.08
  -6   3   3    0.05    0.09
   6   3  -3    0.13    0.06
   6   3  -3    0.05    0.08
   5  -3  -3   26.30    0.63
   5  -3  -3   26.78    0.72
  -5  -3   3   26.81    0.69
  -5  -3   3   25.37    0.68
  -5   3   3   26.87    0.72
  -5   3   3   26.93    0.67
   5   3  -3   26.40    0.61
  -5   3   3   25.98    0.71
   5   3  -3   26.27    0.71
  -4  -3   3    0.21    0.09
  -4  -3   3    0.06    0.06
   4  -3  -3    0.23    0.07
   4  -3  -3    0.28    0.09
  -4   3   3    0.07    0.06
   4   3  -3    0.31    0.06
  -4   3   3    0.14    0.08
   4   3  -3    0.35    0.09
  -4   3   3    0.36    0.09
   3  -3  -3   82.96    1.80
   3  -3  -3   82.84    1.76
  -3  -3   3   84.99    1.75
  -3  -3   3   84.56    1.79
   3   3  -3   82.67    1.79
  -3   3   3   85.06    1.72
  -3   3   3   84.21    1.80
   3   3  -3   83.93    1.72
  -3   3   3   82.92    1.79
  -2  -3   3  109.01    2.20
  -2  -3   3  109.55    2.27
   2  -3  -3  108.47    2.25
  -2   3   3  110.26    2.18
   2   3  -3  107.53    2.21
   2   3  -3  107.77    2.27
  -2   3   3  109.07    2.27
   1  -3  -3    1.67    0.06
  -1  -3   3    1.36    0.11
   1  -3  -3    1.54    0.11
  -1  -3   3    1.54    0.08
   1  -3  -3    1.73    0.07
   1   3  -3    1.58    0.10
  -1   3   3    1.78    0.12
   1   3  -3    1.53    0.12
  -1   3   3    1.45    0.11
   1   3  -3    1.54    0.08
   0  -3   3   11.54    0.33
   0  -3  -3   12.00    0.27
   0  -3  -3   11.46    0.35
   0  -3   3   12.13    0.34
   0   3   3   12.35    0.27
   0   3  -3   11.89    0.27
   0   3   3   11.85    0.35
   0   3  -3   11.46    0.33
   0   3   3   12.21    0.34
   0   3  -3   13.06    0.36
   1  -3   3    4.90    0.19
  -1  -3  -3    5.12    0.21
   1  -3   3    5.03    0.21
  -1  -3  -3    4.78    0.15
  -1   3  -3    5.13    0.14
   1   3   3    4.90    0.19
   1   3   3    5.07    0.19
  -1   3  -3    5.03    0.20
  -1   3  -3    4.78    0.21
  -2  -3  -3   75.92    1.58
   2  -3   3   77.30    1.65
   2  -3   3   75.93    1.59
  -2  -3  -3   77.44    1.64
   2   3   3   75.58    1.61
  -2   3  -3   75.79    1.65
   2   3   3   74.31    1.61
  -2   3  -3   75.50    1.56
  -2   3  -3   79.54    1.65
  -3  -3  -3   97.80    2.03
   3  -3   3   97.43    2.09
   3  -3   3   98.29    1.99
  -3  -3  -3   99.16    2.06
   3   3   3   98.05    2.05
  -3   3  -3   95.37    2.07
  -3   3  -3   96.79    2.01
   3   3   3   96.23    2.03
   4  -3   3   18.89    0.55
  -4  -3  -3   18.49    0.51
   4  -3   3   18.53    0.44
  -4  -3  -3   18.80    0.51
  -4   3  -3   18.64    0.49
   4   3   3   17.97    0.51
  -4   3  -3   18.17    0.54
   4   3   3   19.00    0.50
   5  -3   3  118.13    2.59
   5  -3   3  119.54    2.41
  -5  -3  -3  123.48    2.56
  -5  -3  -3  120.35    2.52
  -5   3  -3  120.70    2.59
   5   3   3  122.00    2.52
  -5   3  -3  119.97    2.52
   5   3   3  119.10    2.56
   6  -3   3    0.98    0.06
  -6  -3  -3    1.01    0.15
   6  -3   3    0.89    0.15
  -6  -3  -3    0.84    0.12
  -6   3  -3    1.09    0.15
   6   3   3    0.93    0.14
   6   3   3    0.97    0.13
  -6   3  -3    0.82    0.15
  -7  -3  -3   54.99    1.35
  -7  -3  -3   55.60    1.27
  -7   3  -3   57.13    1.34
   7   3   3   54.40    1.34
  -7   3  -3   53.48    1.37
   7   3   3   56.45    1.29
  -8  -3  -3    0.80    0.13
  -8  -3  -3    0.89    0.17
   8  -3   3    0.91    0.18
   8   3   3    0.90    0.14
   8   3   3    1.03    0.18
  -8   3  -3    0.97    0.19
  -8   3  -3    0.60    0.15
   9  -3   3    6.18    0.38
  -9  -3  -3    6.31    0.36
   9  -3   3    7.26    0.39
   9   3   3    5.92    0.35
  -9   3  -3    5.72    0.38
   9   3   3    6.74    0.32
  -9   3  -3    5.88    0.34
  10  -3   3    0.90    0.21
 -10  -3  -3    0.83    0.20
  10  -3   3    1.25    0.23
  10   3   3    0.84    0.20
 -10   3  -3    1.09    0.22
 -10   3  -3    1.32    0.23
 -11  -3  -3    1.06    0.23
  11  -3   3    0.99    0.23
  11  -3   3    1.08    0.23
 -11   3  -3    0.88    0.23
  11   3   3    1.04    0.23
 -11   3  -3    0.97    0.23
  12  -3   3    0.69    0.22
 -12  -3  -3    0.90    0.24
  12  -3   3    1.21    0.27
 -12   3  -3    0.90    0.24
 -12   3  -3    0.63    0.22
  12   3   3    0.84    0.24
  12  -4  -3    0.79    0.23
 -12  -4   3    0.78    0.24
  12  -4  -3    0.35    0.19
 -12   4   3    0.67    0.20
  12   4  -3    0.94    0.26
 -12   4   3    0.64    0.23
  11  -4  -3    0.39    0.19
 -11  -4   3    0.44    0.19
  11  -4  -3    0.40    0.18
  11   4  -3    0.36    0.19
 -11   4   3    0.57    0.19
 -11   4   3    0.39    0.19
 -10  -4   3    3.10    0.31
  10  -4  -3    3.97    0.33
  10  -4  -3    3.34    0.35
 -10   4   3    3.94    0.29
  10   4  -3    3.64    0.36
 -10   4   3    3.52    0.35
  -9  -4   3    3.34    0.31
   9  -4  -3    3.11    0.30
  -9  -4   3    3.19    0.23
   9   4  -3    3.02    0.30
  -9   4   3    3.42    0.33
  -9   4   3    3.35    0.25
  -8  -4   3    0.26    0.12
   8  -4  -3    0.26    0.13
  -8  -4   3    0.44    0.13
  -8   4   3    0.52    0.13
  -8   4   3    0.38    0.15
   8   4  -3    0.39    0.14
  -7  -4   3    2.63    0.21
   7  -4  -3    2.50    0.16
   7  -4  -3    2.63    0.27
  -7  -4   3    2.43    0.23
  -7   4   3    2.12    0.23
   7   4  -3    2.37    0.15
  -7   4   3    2.57    0.22
   7   4  -3    1.90    0.23
  -6  -4   3    2.07    0.21
  -6  -4   3    1.95    0.19
   6  -4  -3    2.05    0.14
   6  -4  -3    2.58    0.25
  -6   4   3    1.87    0.17
   6   4  -3    1.97    0.21
  -6   4   3    1.94    0.21
   6   4  -3    1.93    0.13
   5  -4  -3    1.80    0.19
  -5  -4   3    2.10    0.18
  -5  -4   3    2.06    0.18
   5  -4  -3    1.95    0.14
  -5   4   3    1.99    0.20
   5   4  -3    1.94    0.12
   5   4  -3    2.20    0.21
  -5   4   3    1.72    0.14
  -5   4   3    1.98    0.20
  -4  -4   3    7.72    0.31
   4  -4  -3    6.61    0.31
   4  -4  -3    7.52    0.27
  -4  -4   3    7.54    0.27
  -4   4   3    7.54    0.32
  -4   4   3    7.67    0.25
  -4   4   3    8.02    0.32
   4   4  -3    7.51    0.25
   4   4  -3    7.34    0.31
   3  -4  -3   89.17    1.92
  -3  -4   3   86.46    1.81
  -3  -4   3   84.67    1.89
   3  -4  -3   86.48    1.85
  -3   4   3   87.75    1.77
   3   4  -3   84.64    1.89
  -3   4   3   89.22    1.91
   3   4  -3   85.93    1.81
  -3   4   3   86.29    1.88
   2  -4  -3    7.57    0.19
   2  -4  -3    7.17    0.27
  -2  -4   3    7.47    0.22
  -2  -4   3    7.24    0.29
  -2   4   3    7.71    0.19
   2   4  -3    7.99    0.30
  -2   4   3    7.42    0.29
   2   4  -3    7.83    0.26
  -2   4   3    7.70    0.28
  -1  -4   3   57.70    1.18
  -1  -4   3   57.14    1.30
   1  -4  -3   57.26    1.29
   1  -4  -3   57.81    1.14
   1   4  -3   58.24    1.18
   1   4  -3   57.93    1.30
  -1   4   3   57.29    1.28
  -1   4   3   59.00    1.31
   1   4  -3   58.08    1.26
   0  -4  -3   12.07    0.26
   0  -4   3   12.09    0.38
   0  -4  -3   12.32    0.26
   0  -4  -3   12.13    0.39
   0  -4   3   12.06    0.37
   0   4  -3   12.42    0.27
   0   4  -3   12.21    0.37
   0   4  -3   12.11    0.27
   0   4   3   12.75    0.39
   0   4  -3   11.20    0.38
   0   4   3   12.23    0.26
   0   4   3   12.14    0.37
  -1  -4  -3    0.35    0.05
   1  -4   3    0.38    0.09
   1  -4   3    0.45    0.10
  -1  -4  -3    0.37    0.09
   1   4   3    0.37    0.08
  -1   4  -3    0.36    0.09
   1   4   3    0.24    0.08
  -1   4  -3    0.37    0.09
  -1   4  -3    0.36    0.04
  -2  -4  -3   18.55    0.45
  -2  -4  -3   19.09    0.54
   2  -4   3   18.09    0.54
   2  -4   3   19.01    0.50
  -2   4  -3   19.03    0.54
  -2   4  -3   18.99    0.54
  -2   4  -3   18.92    0.43
   2   4   3   19.25    0.51
   2   4   3   18.10    0.51
  -3  -4  -3    0.99    0.11
   3  -4   3    1.15    0.11
   3  -4   3    0.89    0.13
  -3  -4  -3    0.97    0.13
   3   4   3    1.14    0.12
   3   4   3    1.15    0.13
  -3   4  -3    1.00    0.14
  -3   4  -3    1.24    0.10
   4  -4   3   31.61    0.74
   4  -4   3   31.59    0.85
  -4  -4  -3   32.45    0.78
  -4  -4  -3   31.56    0.82
  -4   4  -3   32.17    0.75
   4   4   3   31.46    0.81
  -4   4  -3   31.47    0.84
   4   4   3   32.36    0.79
   5  -4   3    9.47    0.40
   5  -4   3    9.80    0.29
  -5  -4  -3    9.62    0.37
  -5  -4  -3   10.46    0.37
  -5   4  -3    9.76    0.34
   5   4   3    9.40    0.37
  -5   4  -3   10.28    0.40
   5   4   3    9.79    0.34
   6  -4   3    0.91    0.17
  -6  -4  -3    0.92    0.15
  -6  -4  -3    1.25    0.16
   6  -4   3    0.83    0.09
  -6   4  -3    1.14    0.15
  -6   4  -3    0.59    0.14
   6   4   3    1.14    0.14
   6   4   3    1.12    0.17
   7  -4   3    0.75    0.17
  -7  -4  -3    0.68    0.14
  -7  -4  -3    0.85    0.16
  -7   4  -3    0.84    0.17
   7   4   3    0.83    0.14
   7   4   3    0.71    0.16
  -7   4  -3    0.87    0.16
   8  -4   3    0.58    0.17
  -8  -4  -3    0.77    0.17
  -8  -4  -3    0.57    0.13
   8   4   3    0.85    0.17
   8   4   3    0.68    0.14
  -8   4  -3    0.74    0.18
  -8   4  -3    0.95    0.18
   9  -4   3    3.74    0.31
  -9  -4  -3    3.57    0.28
   9   4   3    3.94    0.31
  -9   4  -3    3.07    0.26
  -9   4  -3    2.72    0.30
 -10  -4  -3    3.85    0.36
  10  -4   3    4.33    0.35
  10  -4   3    3.65    0.37
 -10   4  -3    3.21    0.31
  10   4   3    4.01    0.34
 -10   4  -3    3.85    0.38
 -11  -4  -3    3.12    0.35
  11  -4   3    3.71    0.39
  11  -4   3    3.62    0.37
 -11   4  -3    3.45    0.38
 -11   4  -3    3.34    0.34
  11   4   3    4.34    0.40
  12  -4   3    0.76    0.23
 -12  -4  -3    0.27    0.18
  12  -4   3    0.82    0.25
  12   4   3    0.71    0.24
 -12   4  -3    0.97    0.24
 -12   4  -3    0.62    0.22
  12  -5  -3    0.47    0.22
 -12  -5   3    0.46    0.19
  12  -5  -3    0.16    0.19
 -12   5   3    0.27    0.21
  12   5  -3    0.45    0.20
 -11  -5   3    0.58    0.21
  11  -5  -3    0.39    0.19
  11  -5  -3    0.72    0.24
  11   5  -3    0.83    0.22
 -11   5   3    0.62    0.22
 -11   5   3    0.70    0.20
 -10  -5   3    0.55    0.16
  10  -5  -3    0.78    0.21
 -10  -5   3    0.76    0.20
 -10   5   3    0.60    0.21
 -10   5   3    0.96    0.20
  10   5  -3    0.83    0.21
  -9  -5   3    0.35    0.13
  -9  -5   3    0.32    0.14
   9  -5  -3    0.12    0.14
  -9   5   3    0.09    0.14
   9   5  -3    0.15    0.14
  -9   5   3    0.25    0.13
  -8  -5   3    0.00    0.10
   8  -5  -3    0.18    0.16
  -8  -5   3    0.02    0.12
   8   5  -3    0.08    0.13
  -8   5   3    0.04    0.10
  -8   5   3   -0.09    0.12
   7  -5  -3    7.25    0.40
  -7  -5   3    7.17    0.35
  -7  -5   3    7.35    0.35
   7  -5  -3    7.20    0.33
  -7   5   3    6.86    0.37
  -7   5   3    6.90    0.31
   7   5  -3    7.47    0.38
  -6  -5   3   45.78    1.17
  -6  -5   3   47.37    1.13
   6  -5  -3   47.06    1.09
   6  -5  -3   45.44    1.21
  -6   5   3   45.87    1.20
  -6   5   3   46.66    1.08
   6   5  -3   47.46    1.20
   6   5  -3   45.49    1.05
   5  -5  -3    1.76    0.21
   5  -5  -3    1.79    0.17
  -5  -5   3    2.02    0.21
  -5  -5   3    1.67    0.17
   5   5  -3    1.54    0.20
  -5   5   3    1.86    0.21
   5   5  -3    1.57    0.14
  -5   5   3    1.80    0.15
  -5   5   3    2.24    0.23
  -4  -5   3   26.90    0.75
   4  -5  -3   26.12    0.70
   4  -5  -3   25.89    0.76
  -4  -5   3   26.63    0.66
   4   5  -3   27.16    0.75
  -4   5   3   26.07    0.76
  -4   5   3   26.67    0.62
  -4   5   3   26.09    0.74
   4   5  -3   26.74    0.66
  -3  -5   3    0.22    0.07
   3  -5  -3    0.20    0.08
   3  -5  -3    0.23    0.11
  -3  -5   3    0.21    0.10
   3  -5  -3    0.17    0.05
  -3   5   3    0.18    0.05
   3   5  -3    0.20    0.08
  -3   5   3    0.24    0.09
   3   5  -3    0.17    0.09
  -3   5   3    0.09    0.09
  -2  -5   3    0.89    0.08
   2  -5  -3    0.70    0.12
  -2  -5   3    0.91    0.14
   2  -5  -3    0.96    0.04
   2  -5  -3    0.90    0.04
   2   5  -3    0.84    0.11
   2   5  -3    0.92    0.13
  -2   5   3    0.85    0.14
  -2   5   3    1.05    0.14
   1  -5  -3   10.07    0.37
  -1  -5   3    9.79    0.37
   1   5  -3   10.10    0.24
   1   5  -3    9.36    0.36
  -1   5   3   10.09    0.37
  -1   5   3   10.06    0.35
   1   5  -3   10.48    0.35
   0  -5  -3    0.10    0.08
   0  -5   3    0.02    0.08
   0  -5   3   -0.06    0.08
   0   5   3    0.11    0.08
   0   5   3    0.16    0.08
   0   5  -3    0.05    0.09
   0   5  -3    0.01    0.07
   1  -5   3    1.06    0.15
  -1  -5  -3    0.82    0.13
  -1  -5  -3    0.96    0.06
   1  -5   3    1.03    0.13
  -1   5  -3    0.91    0.14
   1   5   3    1.18    0.14
   1   5   3    1.13    0.14
  -1   5  -3    0.93    0.14
   2  -5   3   31.47    0.77
  -2  -5  -3   29.28    0.81
   2  -5   3   30.30    0.81
  -2  -5  -3   29.46    0.68
   2   5   3   31.14    0.78
  -2   5  -3   31.17    0.82
  -2   5  -3   30.58    0.81
   2   5   3   29.98    0.78
  -2   5  -3   30.48    0.65
   3  -5   3    5.37    0.24
  -3  -5  -3    5.11    0.27
  -3  -5  -3    5.60    0.21
   3  -5   3    5.63    0.29
  -3   5  -3    5.70    0.29
   3   5   3    5.42    0.26
   3   5   3    5.37    0.26
  -3   5  -3    5.76    0.19
  -3   5  -3    5.46    0.29
   4  -5   3    3.81    0.20
   4  -5   3    3.99    0.26
  -4  -5  -3    3.63    0.19
  -4  -5  -3    3.56    0.23
   4   5   3    4.19    0.22
  -4   5  -3    3.69    0.24
  -4   5  -3    3.59    0.17
   4   5   3    4.03    0.23
   5  -5   3   14.77    0.42
   5  -5   3   14.28    0.53
  -5  -5  -3   14.15    0.45
  -5  -5  -3   13.63    0.49
  -5   5  -3   13.57    0.42
  -5   5  -3   14.10    0.52
   5   5   3   13.92    0.45
   5   5   3   14.51    0.50
  -6  -5  -3    9.85    0.42
  -6  -5  -3   10.41    0.39
   6  -5   3    9.80    0.45
   6   5   3   10.38    0.42
   6   5   3   10.00    0.38
  -6   5  -3   10.27    0.45
  -6   5  -3    9.66    0.37
  -7  -5  -3    0.05    0.12
  -7  -5  -3   -0.03    0.09
   7  -5   3    0.06    0.14
  -7   5  -3   -0.19    0.09
   7   5   3    0.09    0.10
   7   5   3    0.12    0.13
  -7   5  -3   -0.03    0.11
  -8  -5  -3    1.56    0.20
   8  -5   3    1.20    0.24
  -8  -5  -3    1.63    0.22
   8   5   3    1.71    0.29
  -8   5  -3    1.65    0.25
  -8   5  -3    1.50    0.20
   8   5   3    1.52    0.22
  -9  -5  -3    0.08    0.12
  -9  -5  -3   -0.11    0.12
   9  -5   3    0.13    0.15
  -9   5  -3    0.11    0.12
   9   5   3   -0.02    0.13
  -9   5  -3    0.07    0.14
 -10  -5  -3    0.34    0.17
  10  -5   3    0.51    0.19
 -10   5  -3    0.40    0.15
 -10   5  -3    0.56    0.20
  10   5   3    0.41    0.20
  11  -5   3    0.69    0.24
  11  -5   3    0.94    0.23
 -11  -5  -3    0.83    0.22
  11   5   3    1.16    0.25
 -11   5  -3    1.00    0.25
 -11   5  -3    0.97    0.22
 -12  -5  -3    0.43    0.21
  12  -5   3    0.45    0.21
  12  -5   3    0.60    0.22
 -12   5  -3    0.43    0.23
  12   5   3    0.52    0.22
 -11  -6   3    0.98    0.24
  11  -6  -3    1.63    0.31
 -11   6   3    1.31    0.27
  11   6  -3    1.74    0.30
  10  -6  -3    0.35    0.19
 -10  -6   3   -0.08    0.13
 -10  -6   3    0.14    0.17
 -10   6   3    0.31    0.18
  10   6  -3    0.31    0.20
  -9  -6   3    1.80    0.25
   9  -6  -3    1.25    0.25
  -9  -6   3    1.82    0.24
  -9   6   3    2.20    0.29
   9   6  -3    2.21    0.29
  -8  -6   3    2.88    0.24
  -8  -6   3    3.12    0.31
   8  -6  -3    2.70    0.31
   8   6  -3    3.24    0.33
  -8   6   3    3.37    0.34
  -7  -6   3    8.25    0.42
   7  -6  -3    7.65    0.43
  -7  -6   3    8.15    0.37
   7   6  -3    8.09    0.42
  -7   6   3    8.21    0.43
  -6  -6   3   10.75    0.45
   6  -6  -3    9.88    0.39
  -6  -6   3    9.83    0.38
   6  -6  -3   10.67    0.49
   6   6  -3    9.71    0.44
  -6   6   3    9.37    0.44
  -6   6   3   10.24    0.48
  -5  -6   3   39.27    0.95
   5  -6  -3   39.77    0.99
   5  -6  -3   38.14    1.08
  -5  -6   3   39.15    1.06
   5   6  -3   39.72    0.95
  -5   6   3   38.86    1.09
  -5   6   3   39.91    1.07
   5   6  -3   39.83    1.06
   4  -6  -3    2.02    0.24
   4  -6  -3    2.30    0.22
  -4  -6   3    2.30    0.24
  -4  -6   3    2.13    0.15
  -4   6   3    2.41    0.24
  -4   6   3    2.32    0.25
   4   6  -3    2.44    0.18
   4   6  -3    2.63    0.25
  -3  -6   3   14.61    0.39
  -3  -6   3   14.48    0.52
   3  -6  -3   14.53    0.53
   3  -6  -3   14.41    0.49
   3   6  -3   13.98    0.45
  -3   6   3   14.32    0.52
   3   6  -3   14.05    0.51
  -3   6   3   14.85    0.51
   2  -6  -3   11.84    0.43
  -2  -6   3   11.26    0.30
  -2  -6   3   11.23    0.44
   2   6  -3   11.15    0.40
   2   6  -3   11.87    0.44
  -2   6   3   11.28    0.45
  -2   6   3   12.09    0.44
  -1  -6   3   34.69    0.91
   1  -6  -3   33.69    0.89
   1   6  -3   32.84    0.90
  -1   6   3   32.30    0.87
   1   6  -3   32.68    0.87
  -1   6   3   35.25    0.91
   0  -6   3   68.79    1.59
   0  -6   3   70.80    1.60
   0  -6  -3   69.49    1.61
   0   6   3   68.20    1.59
   0   6   3   68.02    1.58
   0   6  -3   69.51    1.59
   0   6  -3   68.62    1.61
   1  -6   3   35.05    0.90
  -1  -6  -3   33.86    0.92
   1  -6   3   34.59    0.92
   1   6   3   34.66    0.90
   1   6   3   35.06    0.90
  -1   6  -3   34.41    0.92
  -1   6  -3   33.60    0.92
  -2  -6  -3   33.84    0.91
   2  -6   3   34.11    0.87
  -2  -6  -3   32.67    0.73
   2  -6   3   34.08    0.92
  -2   6  -3   33.78    0.91
  -2   6  -3   33.28    0.92
   2   6   3   33.13    0.88
   2   6   3   33.85    0.88
   3  -6   3   14.36    0.47
  -3  -6  -3   14.88    0.40
   3  -6   3   14.64    0.54
  -3  -6  -3   15.00    0.53
   3   6   3   14.62    0.50
   3   6   3   14.69    0.49
  -3   6  -3   14.37    0.53
  -3   6  -3   14.33    0.52
   4  -6   3   15.47    0.49
  -4  -6  -3   15.76    0.45
  -4  -6  -3   14.74    0.54
   4  -6   3   15.65    0.58
   4   6   3   15.48    0.51
  -4   6  -3   15.43    0.56
   4   6   3   15.00    0.52
   5  -6   3   12.66    0.53
   5  -6   3   12.43    0.42
  -5  -6  -3   12.69    0.49
  -5  -6  -3   12.47    0.42
   5   6   3   12.52    0.44
   5   6   3   12.57    0.48
  -5   6  -3   12.09    0.50
  -6  -6  -3   16.45    0.53
  -6  -6  -3   17.16    0.60
   6  -6   3   16.06    0.64
  -6   6  -3   15.59    0.61
   6   6   3   16.83    0.54
   6   6   3   16.84    0.59
  -7  -6  -3    2.17    0.25
   7  -6   3    2.07    0.28
  -7  -6  -3    1.83    0.21
   7   6   3    2.21    0.22
  -7   6  -3    1.78    0.25
   7   6   3    2.35    0.27
  -8  -6  -3   22.52    0.73
  -8  -6  -3   23.64    0.77
   8  -6   3   24.16    0.85
  -8   6  -3   23.05    0.82
   8   6   3   23.61    0.79
   9  -6   3    5.38    0.43
  -9  -6  -3    4.77    0.33
  -9  -6  -3    4.78    0.33
   9   6   3    5.03    0.36
  -9   6  -3    4.98    0.39
  10  -6   3    0.50    0.21
 -10  -6  -3    0.28    0.17
  10   6   3   -0.01    0.16
 -10   6  -3    0.37    0.19
  11  -6   3    1.23    0.28
 -11  -6  -3    2.11    0.31
 -11   6  -3    2.09    0.33
  11   6   3    1.60    0.30
 -10  -7   3    0.59    0.20
  10  -7  -3    0.25    0.21
 -10   7   3    0.82    0.25
  10   7  -3    0.94    0.24
   9  -7  -3    0.15    0.18
  -9  -7   3    0.15    0.16
   9   7  -3    0.44    0.19
  -9   7   3    0.25    0.18
   8  -7  -3    0.07    0.15
  -8  -7   3    0.13    0.14
  -8   7   3    0.00    0.15
   8   7  -3   -0.11    0.13
  -7  -7   3    2.84    0.30
   7  -7  -3    3.64    0.37
   7   7  -3    3.69    0.36
  -7   7   3    3.54    0.35
   6  -7  -3    0.06    0.15
  -6  -7   3    0.07    0.14
   6  -7  -3    0.00    0.11
  -6   7   3    0.18    0.16
   6   7  -3    0.11    0.14
  -6   7   3    0.28    0.15
   5  -7  -3    2.57    0.24
   5  -7  -3    2.52    0.29
  -5  -7   3    2.15    0.26
  -5   7   3    2.97    0.29
  -5   7   3    2.75    0.31
   5   7  -3    2.62    0.28
   5   7  -3    2.64    0.21
  -4  -7   3    4.49    0.31
   4  -7  -3    4.38    0.28
   4  -7  -3    3.98    0.31
  -4   7   3    4.26    0.29
   4   7  -3    3.67    0.28
  -4   7   3    4.31    0.31
   4   7  -3    3.82    0.25
   3  -7  -3    0.37    0.16
   3  -7  -3    0.48    0.15
  -3  -7   3    0.45    0.15
   3   7  -3    0.56    0.15
  -3   7   3    0.53    0.15
   3   7  -3    0.68    0.14
  -3   7   3    0.26    0.14
   2  -7  -3   10.74    0.44
  -2  -7   3   11.04    0.46
   2   7  -3   10.45    0.45
  -2   7   3   10.71    0.46
  -2   7   3   10.67    0.44
   2   7  -3   10.56    0.42
  -1  -7   3    0.49    0.14
   1  -7  -3    0.49    0.14
  -1  -7   3    0.68    0.16
  -1   7   3    0.45    0.14
   1   7  -3    0.59    0.15
  -1   7   3    0.78    0.15
   1   7  -3    0.40    0.15
   0  -7  -3    1.08    0.19
   0  -7   3    1.02    0.17
   0  -7   3    1.19    0.18
   0   7   3    0.75    0.16
   0   7  -3    1.05    0.18
   0   7   3    0.84    0.16
   0   7  -3    0.85    0.16
   1  -7   3   -0.12    0.10
   1  -7   3    0.18    0.12
  -1  -7  -3    0.03    0.12
   1   7   3   -0.01    0.10
  -1   7  -3    0.11    0.11
   1   7   3    0.05    0.11
  -1   7  -3   -0.05    0.10
   2  -7   3    0.16    0.12
  -2  -7  -3    0.01    0.11
   2  -7   3    0.00    0.09
   2   7   3    0.07    0.11
  -2   7  -3    0.08    0.12
   2   7   3   -0.04    0.09
  -2   7  -3    0.00    0.11
   3  -7   3   -0.02    0.12
  -3  -7  -3    0.10    0.12
   3  -7   3    0.03    0.11
   3   7   3   -0.05    0.10
   3   7   3   -0.06    0.09
  -3   7  -3   -0.06    0.12
  -3   7  -3    0.09    0.12
   4  -7   3    8.43    0.36
   4  -7   3    8.46    0.44
  -4  -7  -3    7.97    0.41
   4   7   3    8.04    0.36
  -4   7  -3    7.62    0.40
   4   7   3    7.18    0.37
   5  -7   3    6.31    0.31
   5  -7   3    7.05    0.41
  -5  -7  -3    5.80    0.36
   5   7   3    6.20    0.33
  -5   7  -3    6.44    0.38
   5   7   3    5.24    0.33
   6  -7   3   -0.15    0.13
  -6  -7  -3    0.06    0.14
  -6   7  -3    0.06    0.13
   6   7   3    0.20    0.12
   6   7   3   -0.15    0.11
  -7  -7  -3    6.47    0.40
   7  -7   3    5.72    0.41
  -7   7  -3    5.64    0.39
   7   7   3    6.37    0.40
   8  -7   3    0.59    0.22
  -8  -7  -3    0.77    0.21
  -8   7  -3    0.73    0.22
   8   7   3    0.96    0.23
   9  -7   3    7.35    0.50
  -9  -7  -3    6.52    0.42
  -9   7  -3    6.00    0.44
   9   7   3    7.32    0.45
  10  -7   3    3.63    0.43
 -10   7  -3    2.97    0.39
  10   7   3    4.42    0.37
  -9  -8   3    0.15    0.18
   9  -8  -3    0.57    0.24
  -9   8   3    0.54    0.22
   9   8  -3    0.46    0.22
  -8  -8   3    8.35    0.48
   8  -8  -3    8.39    0.52
  -8   8   3    8.38    0.50
   8   8  -3    9.12    0.52
  -7  -8   3    0.67    0.22
   7  -8  -3    0.39    0.20
  -7   8   3    0.79    0.22
   7   8  -3    0.58    0.21
   6  -8  -3    2.80    0.34
  -6  -8   3    3.56    0.37
   6   8  -3    3.62    0.35
  -6   8   3    3.81    0.38
  -6   8   3    4.15    0.34
   5  -8  -3    3.63    0.36
   5  -8  -3    3.71    0.29
  -5  -8   3    4.04    0.33
  -5   8   3    4.03    0.37
   5   8  -3    4.10    0.32
  -5   8   3    3.50    0.36
  -4  -8   3    0.27    0.16
   4  -8  -3    0.14    0.15
   4  -8  -3    0.11    0.14
   4   8  -3    0.09    0.13
   4   8  -3    0.04    0.12
  -4   8   3    0.04    0.14
  -4   8   3    0.15    0.14
   3  -8  -3    1.10    0.21
  -3  -8   3    0.94    0.20
   3  -8  -3    1.19    0.20
  -3   8   3    1.41    0.23
   3   8  -3    1.05    0.17
   3   8  -3    1.61    0.24
  -3   8   3    1.40    0.22
   2  -8  -3    0.06    0.12
  -2  -8   3   -0.09    0.11
   2  -8  -3   -0.01    0.13
  -2  -8   3    0.03    0.12
  -2   8   3   -0.11    0.12
  -2   8   3    0.10    0.12
   2   8  -3   -0.02    0.11
   2   8  -3   -0.06    0.12
   1  -8  -3    0.04    0.12
  -1  -8   3    0.19    0.14
  -1  -8   3    0.02    0.13
   1   8  -3    0.01    0.13
   1   8  -3    0.33    0.14
  -1   8   3   -0.07    0.12
  -1   8   3    0.06    0.12
   0  -8   3    0.33    0.15
   0  -8  -3    0.01    0.12
   0  -8   3    0.13    0.13
   0   8   3    0.14    0.13
   0   8  -3    0.12    0.14
   0   8   3    0.05    0.13
   0   8  -3    0.23    0.13
   1  -8   3    0.50    0.15
   1  -8   3    0.61    0.17
  -1  -8  -3    0.50    0.17
   1   8   3    0.51    0.17
   1   8   3    0.42    0.15
  -1   8  -3    0.75    0.18
  -1   8  -3    0.55    0.17
   2  -8   3    5.39    0.35
  -2  -8  -3    5.15    0.36
   2  -8   3    5.52    0.32
   2   8   3    5.33    0.33
  -2   8  -3    5.21    0.34
   2   8   3    5.08    0.32
  -2   8  -3    5.12    0.36
   3  -8   3    0.59    0.19
   3  -8   3    0.94    0.18
  -3  -8  -3    0.68    0.19
  -3   8  -3    0.86    0.21
  -3   8  -3    0.99    0.21
   3   8   3    1.25    0.20
   3   8   3    0.97    0.20
   4  -8   3    3.30    0.26
   4  -8   3    2.72    0.31
  -4  -8  -3    2.25    0.28
   4   8   3    3.07    0.31
   4   8   3    2.90    0.28
  -4   8  -3    3.12    0.32
   5  -8   3   -0.03    0.16
  -5  -8  -3    0.19    0.15
   5   8   3    0.23    0.14
   5   8   3    0.03    0.12
  -5   8  -3    0.08    0.14
   6  -8   3    4.64    0.39
  -6  -8  -3    5.51    0.37
  -6   8  -3    4.88    0.37
   6   8   3    4.70    0.36
   7  -8   3    1.95    0.33
  -7  -8  -3    2.50    0.31
  -7   8  -3    2.61    0.33
   7   8   3    1.75    0.27
  -8  -8  -3    0.73    0.22
   8  -8   3    0.67    0.26
   8   8   3    1.04    0.23
  -8   8  -3    0.71    0.23
  -9  -8  -3    0.02    0.17
   9  -8   3   -0.24    0.17
   9   8   3   -0.02    0.17
  -9   8  -3   -0.17    0.20
   8  -9  -3    2.17    0.35
  -8  -9   3    2.57    0.35
  -8   9   3    2.26    0.33
   8   9  -3    2.68    0.35
  -7  -9   3    2.03    0.31
   7  -9  -3    1.32    0.29
  -7   9   3    1.65    0.29
   7   9  -3    1.52    0.29
  -6  -9   3    0.38    0.19
   6  -9  -3    0.21    0.19
   6   9  -3   -0.04    0.18
  -6   9   3    0.17    0.18
   5  -9  -3    0.11    0.14
  -5  -9   3   -0.08    0.14
   5  -9  -3   -0.14    0.18
  -5   9   3    0.10    0.19
   5   9  -3    0.02    0.14
  -5   9   3    0.12    0.16
  -4  -9   3    0.37    0.18
   4  -9  -3    0.89    0.21
   4  -9  -3    1.08    0.24
   4   9  -3    1.00    0.22
  -4   9   3    0.79    0.21
  -4   9   3    0.82    0.22
   3  -9  -3    0.51    0.18
   3  -9  -3    0.78    0.21
  -3  -9   3    0.37    0.16
  -3  -9   3    0.69    0.20
   3   9  -3    0.56    0.20
  -3   9   3    0.71    0.21
  -3   9   3    0.50    0.20
   3   9  -3    0.57    0.18
   2  -9  -3    0.56    0.18
  -2  -9   3    0.32    0.18
  -2  -9   3    0.45    0.17
   2  -9  -3    0.48    0.21
   2   9  -3    0.43    0.18
  -2   9   3    0.67    0.21
   2   9  -3    0.80    0.19
  -2   9   3    0.86    0.20
   1  -9  -3    3.32    0.33
  -1  -9   3    2.90    0.31
  -1  -9   3    3.19    0.33
   1  -9  -3    2.76    0.31
   1   9  -3    3.15    0.32
   1   9  -3    3.66    0.35
  -1   9   3    3.23    0.33
  -1   9   3    2.85    0.32
   0  -9  -3    0.27    0.16
   0  -9   3    0.30    0.16
   0  -9   3    0.34    0.16
   0   9  -3    0.23    0.17
   0   9   3    0.68    0.20
   0   9  -3    0.54    0.17
   0   9   3    0.60    0.18
  -1  -9  -3    2.18    0.29
   1  -9   3    2.75    0.32
   1  -9   3    2.61    0.29
   1   9   3    3.02    0.32
  -1   9  -3    2.40    0.30
   1   9   3    1.99    0.26
  -1   9  -3    2.51    0.30
   2  -9   3    1.27    0.25
  -2  -9  -3    0.99    0.22
   2  -9   3    1.38    0.23
  -2   9  -3    1.01    0.22
  -2   9  -3    1.52    0.25
   2   9   3    1.42    0.23
   2   9   3    1.43    0.24
   3  -9   3    4.54    0.32
   3  -9   3    4.76    0.37
  -3  -9  -3    5.47    0.39
  -3   9  -3    5.16    0.39
   3   9   3    4.99    0.34
   3   9   3    5.28    0.35
  -3   9  -3    5.04    0.37
   4  -9   3    0.09    0.13
  -4  -9  -3   -0.10    0.14
   4  -9   3   -0.03    0.18
   4   9   3    0.00    0.13
   4   9   3   -0.10    0.13
  -4   9  -3   -0.09    0.14
  -5  -9  -3    1.51    0.28
   5  -9   3    1.38    0.28
   5   9   3    1.45    0.25
  -5   9  -3    1.78    0.28
   6  -9   3   -0.06    0.17
  -6  -9  -3    0.32    0.20
  -6   9  -3    0.17    0.17
   6   9   3    0.01    0.15
  -7  -9  -3    0.09    0.17
   7  -9   3   -0.07    0.21
  -7   9  -3   -0.14    0.16
   7   9   3   -0.14    0.15
   8  -9   3    0.45    0.24
  -8  -9  -3    1.11    0.27
  -8   9  -3    0.46    0.24
   8   9   3    0.46    0.22
   6 -10  -3    1.00    0.29
  -6 -10   3    1.15    0.28
  -6  10   3    1.27    0.27
   6  10  -3    0.72    0.23
  -5 -10   3    3.09    0.37
   5 -10  -3    2.78    0.37
   5 -10  -3    3.10    0.40
   5  10  -3    2.37    0.34
  -5  10   3    3.68    0.40
  -5  10   3    3.28    0.40
   4 -10  -3    0.17    0.19
  -4 -10   3    0.40    0.20
   4 -10  -3    0.02    0.16
  -4  10   3    0.14    0.19
   4  10  -3    0.23    0.18
  -4  10   3    0.25    0.18
  -3 -10   3    1.30    0.26
   3 -10  -3    1.35    0.26
   3 -10  -3    1.48    0.27
   3  10  -3    1.51    0.27
  -3  10   3    1.22    0.24
  -3  10   3    1.25    0.27
   2 -10  -3    0.09    0.16
  -2 -10   3    0.31    0.19
  -2 -10   3    0.25    0.17
   2 -10  -3    0.26    0.19
   2  10  -3    0.26    0.16
  -2  10   3    0.23    0.19
   2  10  -3    0.37    0.20
  -2  10   3    0.16    0.17
  -1 -10   3    4.07    0.40
   1 -10  -3    3.55    0.38
   1 -10  -3    3.79    0.38
  -1 -10   3    4.13    0.35
   1  10  -3    3.67    0.36
   1  10  -3    4.19    0.41
  -1  10   3    4.13    0.40
  -1  10   3    3.83    0.39
   0 -10   3    0.73    0.21
   0 -10  -3    0.89    0.22
   0 -10  -3    0.49    0.19
   0 -10   3    0.41    0.17
   0  10   3    0.38    0.20
   0  10  -3    0.94    0.22
   0  10  -3    0.88    0.22
   0  10   3    0.59    0.21
   1 -10   3    2.75    0.33
   1 -10   3    3.08    0.35
  -1 -10  -3    3.18    0.36
  -1  10  -3    3.19    0.38
   1  10   3    2.94    0.33
  -1  10  -3    3.14    0.35
   1  10   3    3.42    0.34
   2 -10   3   -0.01    0.16
   2 -10   3    0.15    0.15
  -2 -10  -3   -0.08    0.15
   2  10   3    0.17    0.17
   2  10   3   -0.01    0.16
  -2  10  -3   -0.18    0.14
  -2  10  -3    0.55    0.21
  -3 -10  -3    6.88    0.45
   3 -10   3    7.20    0.42
   3 -10   3    6.48    0.45
  -3  10  -3    6.01    0.45
   3  10   3    6.81    0.45
   3  10   3    6.43    0.40
   4 -10   3    0.08    0.16
   4 -10   3    0.05    0.18
  -4 -10  -3    0.32    0.21
   4  10   3    0.60    0.25
   4  10   3    0.52    0.21
  -4  10  -3    0.32    0.20
  -5 -10  -3    2.00    0.33
   5 -10   3    1.21    0.29
  -5  10  -3    1.39    0.29
   5  10   3    1.45    0.27
  -6 -10  -3    2.70    0.36
   6 -10   3    2.73    0.39
   6  10   3    3.22    0.38
  -6  10  -3    3.15    0.41
   3 -11  -3    0.17    0.23
   3 -11  -3    0.07    0.19
  -3 -11   3   -0.08    0.17
   3  11  -3    0.09    0.18
  -3  11   3   -0.17    0.20
  -3  11   3   -0.18    0.14
   2 -11  -3   -0.22    0.17
  -2 -11   3   -0.03    0.19
   2 -11  -3    0.07    0.17
  -2  11   3   -0.08    0.16
   2  11  -3   -0.01    0.16
  -2  11   3    0.01    0.19
  -1 -11   3    0.99    0.25
  -1 -11   3    0.91    0.24
   1 -11  -3    1.03    0.26
   1 -11  -3    0.53    0.24
   1  11  -3    0.99    0.25
  -1  11   3    0.52    0.22
  -1  11   3    0.89    0.24
   1  11  -3    0.82    0.22
   0 -11  -3   -0.19    0.16
   0 -11   3   -0.07    0.18
   0 -11   3    0.23    0.19
   0 -11  -3    0.05    0.17
   0  11   3    0.00    0.17
   0  11  -3    0.10    0.17
   0  11  -3    0.05    0.20
   0  11   3   -0.06    0.17
  -1 -11  -3    0.33    0.22
   1 -11   3    0.41    0.21
  -1 -11  -3    0.52    0.22
   1 -11   3    0.37    0.21
   1  11   3    0.75    0.24
  -1  11  -3    0.36    0.21
  -1  11  -3    0.38    0.20
   1  11   3    0.72    0.25
  -2 -11  -3    0.48    0.22
  -2 -11  -3    0.44    0.21
   2 -11   3    0.31    0.19
   2 -11   3    0.19    0.20
  -2  11  -3    0.60    0.22
   2  11   3    0.37    0.22
   2  11   3    0.46    0.21
  -3 -11  -3    0.09    0.18
   3 -11   3   -0.15    0.21
   3 -11   3   -0.18    0.18
   3  11   3    0.27    0.18
   3  11   3    0.04    0.22
  -3  11  -3   -0.04    0.19
  13   0  -4    1.05    0.26
 -13   0   4    0.87    0.25
 -12   0   4   11.98    0.58
  12   0  -4   12.67    0.60
 -11   0   4   31.77    0.99
  11   0  -4   32.05    1.01
  10   0  -4    0.56    0.17
 -10   0   4    0.56    0.17
   9   0  -4   12.66    0.42
  -9   0   4   12.42    0.50
   9   0  -4   11.27    0.49
   8   0  -4   22.54    0.60
  -8   0   4   21.54    0.67
   8   0  -4   22.06    0.69
  -8   0   4   21.67    0.56
  -7   0   4   16.94    0.44
  -7   0   4   16.55    0.53
   7   0  -4   16.18    0.47
   7   0  -4   16.89    0.54
  -6   0   4    4.71    0.18
   6   0  -4    4.39    0.19
  -6   0   4    4.62    0.23
   6   0  -4    4.68    0.24
  -5   0   4  233.35    4.71
   5   0  -4  235.31    4.71
  -5   0   4  229.33    4.70
   5   0  -4  230.22    4.63
  -5   0   4  232.31    4.63
  -4   0   4  492.52    9.76
  -4   0   4  497.50    9.77
   4   0  -4  489.85    9.83
   4   0  -4  496.44    9.77
  -4   0   4  490.20    9.77
  -3   0   4   46.57    0.99
   3   0  -4   46.66    1.02
  -3   0   4   46.73    1.02
   3   0  -4   47.62    0.97
  -3   0   4   47.81    1.02
  -2   0   4  770.33   15.51
   2   0  -4  764.54   15.51
  -2   0   4  775.23   15.29
  -2   0   4  763.32   15.48
   2   0  -4  798.11   15.39
   1   0  -4  260.01    5.15
   1   0  -4  264.35    5.15
   1   0  -4  255.09    5.09
  -1   0   4  259.15    5.14
  -1   0   4  249.03    5.19
  -1   0   4  259.26    5.15
   0   0   4  693.45   13.72
   0   0   4  698.40   13.69
   0   0   4  690.27   13.53
   0   0  -4  684.67   13.74
   0   0  -4  674.16   14.39
  -1   0  -4   58.75    1.26
  -1   0  -4   61.77    1.24
  -1   0  -4   65.03    1.24
   1   0   4   61.21    1.23
   1   0   4   59.05    1.26
  -2   0  -4  269.61    5.39
  -2   0  -4  269.22    5.39
  -2   0  -4  266.69    5.37
   2   0   4  279.19    5.40
  -2   0  -4  272.85    5.38
   3   0   4   64.99    1.29
  -3   0  -4   63.66    1.36
   3   0   4   63.64    1.37
  -3   0  -4   63.92    1.28
  -3   0  -4   62.95    1.29
   3   0   4   65.11    1.37
  -3   0  -4   65.95    1.39
   4   0   4   27.65    0.68
  -4   0  -4   27.43    0.69
  -4   0  -4   28.24    0.58
   4   0   4   28.21    0.69
  -4   0  -4   28.52    0.69
   5   0   4   13.81    0.42
  -5   0  -4   13.71    0.43
  -5   0  -4   14.22    0.44
  -5   0  -4   14.12    0.31
   5   0   4   13.34    0.42
   6   0   4  153.00    3.21
  -6   0  -4  149.74    3.21
  -6   0  -4  153.07    3.02
  -6   0  -4  156.93    3.22
   6   0   4  151.21    3.18
  -7   0  -4   15.09    0.52
   7   0   4   15.90    0.52
   7   0   4   14.78    0.49
  -7   0  -4   14.63    0.51
   8   0   4   68.71    1.65
   8   0   4   69.42    1.62
  -8   0  -4   70.53    1.67
  -8   0  -4   69.66    1.67
   9   0   4   11.50    0.46
  -9   0  -4   10.49    0.48
   9   0   4   11.87    0.49
  10   0   4    0.66    0.18
  10   0   4    0.64    0.16
 -10   0  -4    0.36    0.16
 -11   0  -4    1.81    0.28
  11   0   4    2.01    0.28
  11   0   4    2.12    0.26
  12   0   4    5.68    0.43
 -12   0  -4    5.57    0.41
  13   0   4    2.61    0.35
 -13   0  -4    2.31    0.35
 -13  -1   4    1.24    0.26
  13  -1  -4    1.52    0.30
  13   1  -4    1.06    0.27
 -13   1   4    1.32    0.27
 -12  -1   4    3.37    0.36
  12  -1  -4    3.57    0.38
 -12   1   4    4.09    0.39
  12   1  -4    3.55    0.38
  11  -1  -4    1.91    0.27
 -11  -1   4    1.91    0.27
 -11   1   4    1.75    0.26
  11   1  -4    1.89    0.28
  10  -1  -4    7.05    0.34
 -10  -1   4    7.53    0.40
  10  -1  -4    7.47    0.41
  10   1  -4    6.03    0.38
 -10   1   4    6.63    0.38
   9  -1  -4    3.42    0.24
   9  -1  -4    3.17    0.26
  -9  -1   4    2.74    0.27
  -9   1   4    3.37    0.26
   9   1  -4    3.48    0.20
   9   1  -4    3.65    0.28
  -9   1   4    3.18    0.30
   8  -1  -4    0.07    0.09
   8  -1  -4    0.07    0.10
  -8  -1   4   -0.07    0.09
  -8  -1   4    0.08    0.07
  -8   1   4   -0.13    0.09
   8   1  -4   -0.07    0.09
  -8   1   4    0.05    0.06
   8   1  -4    0.07    0.07
  -8   1   4    0.03    0.10
   7  -1  -4   19.81    0.56
   7  -1  -4   20.83    0.63
  -7  -1   4   20.26    0.61
  -7  -1   4   20.20    0.53
  -7   1   4   20.56    0.50
  -7   1   4   19.46    0.60
  -7   1   4   19.77    0.62
   7   1  -4   20.43    0.62
   7   1  -4   20.51    0.52
   6  -1  -4    6.91    0.26
  -6  -1   4    7.19    0.25
   6  -1  -4    7.27    0.31
  -6  -1   4    7.30    0.30
  -6   1   4    7.07    0.31
  -6   1   4    6.88    0.29
   6   1  -4    7.12    0.30
  -6   1   4    7.05    0.23
   6   1  -4    7.35    0.23
  -5  -1   4   10.17    0.34
   5  -1  -4    9.57    0.34
   5  -1  -4   10.43    0.32
  -5  -1   4   10.06    0.30
  -5   1   4   10.43    0.35
   5   1  -4   10.02    0.27
   5   1  -4    9.77    0.34
  -5   1   4   10.05    0.28
  -5   1   4    9.40    0.33
  -4  -1   4    0.83    0.10
  -4  -1   4    1.00    0.10
   4  -1  -4    1.13    0.12
   4  -1  -4    0.85    0.09
   4   1  -4    0.96    0.06
  -4   1   4    0.96    0.11
  -4   1   4    1.01    0.11
   4   1  -4    0.87    0.10
  -4   1   4    0.99    0.08
  -3  -1   4   97.61    1.96
   3  -1  -4   94.08    1.94
  -3  -1   4   94.22    1.96
  -3  -1   4   97.01    1.88
   3   1  -4   95.50    1.88
   3   1  -4   92.88    1.97
  -3   1   4   94.69    1.96
  -3   1   4   93.70    1.94
  -3   1   4   94.52    1.97
  -3   1   4   96.64    1.93
  -2  -1   4   30.01    0.67
  -2  -1   4   30.35    0.66
   2   1  -4   29.79    0.67
  -2   1   4   29.15    0.66
  -2   1   4   30.77    0.66
  -2   1   4   29.89    0.65
  -2   1   4   30.27    0.66
  -1  -1   4  475.67    9.45
  -1  -1   4  468.06    9.55
  -1  -1   4  476.40    9.55
   1  -1  -4  474.09    9.49
  -1  -1   4  484.93    9.46
   1   1  -4  488.40    9.60
   1   1  -4  483.78    9.45
  -1   1   4  490.35    9.56
  -1   1   4  479.75    9.65
  -1   1   4  467.10    9.47
  -1   1   4  477.19    9.61
   1   1  -4  466.89    9.56
   0  -1  -4   95.87    1.87
   0  -1  -4   95.28    1.89
   0  -1  -4   93.13    1.90
   0  -1   4   96.64    1.90
   0  -1   4   96.36    1.90
   0   1   4   95.43    1.87
   0   1  -4   92.31    1.89
   0   1   4   92.52    1.90
   0   1   4   92.65    1.90
   0   1  -4   93.57    1.90
  -1  -1  -4  965.46   19.30
  -1  -1  -4  950.53   19.32
   1  -1   4  990.30   19.22
   1  -1   4  962.37   19.40
   1   1   4  979.95   19.41
  -1   1  -4  948.96   19.34
  -1   1  -4  971.73   19.34
   1   1   4 1000.00   19.23
   2  -1   4   15.30    0.40
  -2  -1  -4   15.78    0.36
   2  -1   4   14.96    0.32
  -2  -1  -4   15.35    0.39
   2   1   4   14.20    0.38
  -2   1  -4   15.39    0.38
  -2   1  -4   14.99    0.32
  -2   1  -4   14.84    0.38
   2   1   4   15.01    0.37
  -3  -1  -4   13.74    0.34
  -3  -1  -4   13.91    0.38
   3  -1   4   13.56    0.39
   3   1   4   13.72    0.37
  -3   1  -4   14.08    0.38
  -3   1  -4   13.12    0.37
   3   1   4   13.70    0.36
   4  -1   4    0.90    0.11
  -4  -1  -4    1.02    0.12
  -4  -1  -4    0.95    0.08
  -4   1  -4    0.79    0.11
  -4   1  -4    0.99    0.12
   4   1   4    1.09    0.11
   4   1   4    1.08    0.12
  -5  -1  -4    3.05    0.19
  -5  -1  -4    2.99    0.13
   5   1   4    3.17    0.17
  -5   1  -4    3.03    0.18
  -5   1  -4    2.80    0.18
   5   1   4    2.87    0.17
  -6  -1  -4    1.15    0.15
   6  -1   4    1.07    0.14
  -6  -1  -4    1.10    0.10
   6  -1   4    1.22    0.16
   6   1   4    1.28    0.15
  -6   1  -4    0.99    0.14
   6   1   4    1.14    0.14
  -6   1  -4    1.06    0.15
  -7  -1  -4    0.19    0.10
   7  -1   4    0.18    0.11
   7  -1   4    0.17    0.11
  -7  -1  -4    0.22    0.06
  -7   1  -4    0.03    0.09
  -7   1  -4    0.06    0.10
   7   1   4    0.20    0.10
   7   1   4    0.18    0.09
   8  -1   4    1.46    0.20
   8  -1   4    1.95    0.22
  -8  -1  -4    1.68    0.21
   8   1   4    1.86    0.19
   8   1   4    1.49    0.19
  -8   1  -4    1.48    0.20
  -8   1  -4    1.62    0.21
  -9  -1  -4    2.39    0.27
   9  -1   4    2.70    0.27
   9  -1   4    2.63    0.28
   9   1   4    2.63    0.22
   9   1   4    2.63    0.28
  -9   1  -4    1.92    0.24
  -9   1  -4    2.58    0.27
  10  -1   4    1.14    0.22
 -10  -1  -4    0.81    0.19
  10  -1   4    1.16    0.21
  10   1   4    0.94    0.18
 -10   1  -4    1.03    0.21
  10   1   4    1.07    0.21
 -10   1  -4    0.88    0.20
 -11  -1  -4    1.11    0.23
  11  -1   4    1.10    0.23
  11  -1   4    1.90    0.27
 -11   1  -4    1.56    0.25
  11   1   4    1.49    0.27
  11   1   4    1.57    0.29
  12  -1   4    0.05    0.15
  12  -1   4    0.16    0.17
 -12  -1  -4    0.11    0.17
 -12   1  -4    0.25    0.19
  12   1   4    0.26    0.19
 -13  -1  -4    0.24    0.22
  13  -1   4    0.37    0.21
 -13   1  -4    0.18    0.19
  13   1   4    0.19    0.20
 -13  -2   4    1.87    0.30
  13  -2  -4    1.74    0.31
  13   2  -4    1.63    0.30
 -13   2   4    1.59    0.28
 -12  -2   4    4.18    0.40
  12  -2  -4    3.75    0.39
  12   2  -4    4.27    0.41
 -12   2   4    4.81    0.37
  11  -2  -4    1.42    0.22
 -11  -2   4    1.35    0.24
  11  -2  -4    1.47    0.25
 -11   2   4    1.57    0.27
 -11   2   4    1.47    0.24
  11   2  -4    2.34    0.30
  10  -2  -4    0.28    0.15
 -10  -2   4    0.58    0.17
  10  -2  -4    0.29    0.16
 -10   2   4    0.72    0.19
  10   2  -4    0.14    0.15
 -10   2   4    0.56    0.17
   9  -2  -4    2.78    0.28
  -9  -2   4    2.71    0.27
   9  -2  -4    2.85    0.23
  -9  -2   4    2.93    0.20
  -9   2   4    2.90    0.27
   9   2  -4    2.37    0.26
  -9   2   4    2.98    0.30
   8  -2  -4    2.07    0.24
   8  -2  -4    2.35    0.22
  -8  -2   4    1.82    0.22
  -8  -2   4    2.08    0.17
   8   2  -4    1.77    0.22
   8   2  -4    2.30    0.15
  -8   2   4    2.27    0.24
  -8   2   4    2.42    0.25
  -7  -2   4    0.96    0.15
  -7  -2   4    1.28    0.14
   7  -2  -4    1.20    0.17
   7  -2  -4    1.07    0.15
  -7   2   4    1.00    0.16
   7   2  -4    0.88    0.15
  -7   2   4    1.16    0.16
  -7   2   4    1.16    0.11
   7   2  -4    1.23    0.10
   6  -2  -4   22.11    0.61
  -6  -2   4   23.19    0.63
  -6  -2   4   22.69    0.59
  -6   2   4   21.84    0.61
  -6   2   4   21.80    0.53
   6   2  -4   21.21    0.63
  -6   2   4   21.95    0.64
   6   2  -4   21.40    0.52
   5  -2  -4   10.12    0.34
  -5  -2   4   10.18    0.35
  -5  -2   4   10.29    0.33
  -5   2   4    9.85    0.29
  -5   2   4    9.94    0.33
  -5   2   4    9.75    0.35
   5   2  -4   10.53    0.36
   5   2  -4   10.16    0.26
  -4  -2   4   14.56    0.40
   4  -2  -4   14.05    0.37
  -4  -2   4   14.57    0.41
   4  -2  -4   14.10    0.41
  -4   2   4   14.14    0.41
  -4   2   4   14.01    0.39
   4   2  -4   14.27    0.33
  -4   2   4   14.45    0.42
  -4   2   4   13.67    0.36
   4   2  -4   13.85    0.42
   3  -2  -4   65.99    1.40
   3  -2  -4   65.97    1.37
  -3  -2   4   64.01    1.38
  -3  -2   4   64.82    1.39
  -3   2   4   64.48    1.40
   3   2  -4   65.45    1.41
  -3   2   4   64.91    1.37
  -3   2   4   64.01    1.39
  -3   2   4   65.30    1.36
   3   2  -4   65.99    1.31
  -2  -2   4   81.39    1.66
  -2  -2   4   80.84    1.69
   2  -2  -4   79.62    1.67
  -2   2   4   82.24    1.69
   2   2  -4   81.04    1.62
  -2   2   4   80.20    1.67
  -2   2   4   81.68    1.65
  -2   2   4   79.75    1.67
   2   2  -4   81.87    1.69
  -1  -2   4   48.99    1.03
   1  -2  -4   50.45    1.02
  -1  -2   4   49.82    1.07
  -1  -2   4   49.69    1.03
   1  -2  -4   49.85    1.07
  -1   2   4   50.26    1.06
   1   2  -4   49.22    1.07
  -1   2   4   49.51    1.04
  -1   2   4   49.81    1.07
   1   2  -4   49.81    1.03
   1   2  -4   49.88    1.03
   0  -2   4    0.66    0.07
   0  -2   4    0.61    0.07
   0  -2  -4    0.60    0.05
   0  -2  -4    0.67    0.08
   0   2   4    0.78    0.08
   0   2  -4    0.80    0.06
   0   2   4    0.73    0.06
   0   2  -4    0.61    0.07
   0   2  -4    0.64    0.07
   1  -2   4    9.81    0.29
  -1  -2  -4   10.43    0.27
   1  -2   4   10.09    0.26
  -1  -2  -4    9.93    0.29
  -1   2  -4    9.90    0.29
   1   2   4   10.43    0.27
   1   2   4   10.24    0.29
  -1   2  -4   10.17    0.26
  -2  -2  -4  140.79    2.88
   2  -2   4  140.32    2.90
   2  -2   4  141.52    2.83
  -2  -2  -4  142.35    2.87
  -2   2  -4  140.74    2.89
  -2   2  -4  142.90    2.86
   2   2   4  142.49    2.86
   2   2   4  143.86    2.88
  -3  -2  -4   24.97    0.61
   3  -2   4   25.80    0.64
   3  -2   4   24.78    0.53
  -3  -2  -4   24.91    0.60
  -3   2  -4   23.88    0.60
  -3   2  -4   25.06    0.63
   3   2   4   25.59    0.61
   3   2   4   24.72    0.61
  -4  -2  -4  103.83    2.18
  -4  -2  -4  106.79    2.22
   4  -2   4  106.29    2.25
   4  -2   4  108.92    2.08
   4  -2   4  104.18    2.08
  -4   2  -4  104.80    2.21
   4   2   4  104.18    2.20
  -4   2  -4  104.18    2.23
   4   2   4  104.83    2.21
   5  -2   4    0.81    0.13
  -5  -2  -4    0.90    0.13
  -5  -2  -4    1.03    0.11
   5   2   4    1.20    0.13
   5   2   4    1.01    0.13
  -5   2  -4    0.96    0.13
  -5   2  -4    1.02    0.13
  -6  -2  -4   26.52    0.73
  -6  -2  -4   25.39    0.64
   6  -2   4   26.57    0.74
   6   2   4   26.03    0.69
  -6   2  -4   27.69    0.73
  -6   2  -4   27.18    0.75
   6   2   4   25.96    0.72
  -7  -2  -4   22.75    0.69
   7  -2   4   24.32    0.71
  -7  -2  -4   23.55    0.59
   7   2   4   22.80    0.68
  -7   2  -4   22.80    0.68
   7   2   4   23.37    0.65
  -7   2  -4   21.80    0.69
   8  -2   4    0.79    0.17
  -8  -2  -4    0.71    0.16
   8  -2   4    0.95    0.18
  -8   2  -4    0.80    0.17
   8   2   4    0.83    0.17
  -8   2  -4    0.67    0.16
   8   2   4    0.84    0.14
  -9  -2  -4    4.47    0.31
   9  -2   4    4.56    0.30
   9  -2   4    4.25    0.31
   9   2   4    3.98    0.29
   9   2   4    4.73    0.27
  -9   2  -4    4.63    0.32
  -9   2  -4    4.50    0.30
 -10  -2  -4    2.10    0.27
  10  -2   4    1.44    0.24
  10  -2   4    1.98    0.25
 -10   2  -4    1.85    0.27
  10   2   4    1.92    0.22
  10   2   4    2.31    0.27
 -10   2  -4    1.97    0.26
  11  -2   4   23.29    0.81
 -11  -2  -4   26.06    0.87
  11  -2   4   23.01    0.84
  11   2   4   20.97    0.79
 -11   2  -4   23.26    0.85
 -11   2  -4   25.09    0.85
  12  -2   4    5.86    0.43
 -12  -2  -4    7.02    0.45
  12  -2   4    6.65    0.43
  12   2   4    6.41    0.44
 -12   2  -4    5.78    0.43
 -12   2  -4    5.85    0.42
 -13  -2  -4    2.79    0.37
  13  -2   4    3.27    0.40
  13   2   4    3.70    0.41
 -13   2  -4    3.00    0.37
 -13  -3   4    0.90    0.25
  13  -3  -4    1.18    0.27
 -13   3   4    1.13    0.27
  13   3  -4    1.55    0.29
 -13   3   4    1.35    0.27
 -12  -3   4    0.40    0.20
  12  -3  -4    0.54    0.20
 -12   3   4    0.19    0.17
  12   3  -4    0.06    0.16
 -12   3   4    0.56    0.21
  11  -3  -4    1.64    0.24
  11  -3  -4    1.61    0.26
 -11  -3   4    1.54    0.25
 -11   3   4    1.77    0.26
  11   3  -4    1.89    0.27
 -11   3   4    1.94    0.28
  10  -3  -4    1.41    0.22
  10  -3  -4    1.71    0.25
 -10  -3   4    1.60    0.24
 -10   3   4    1.61    0.23
 -10   3   4    1.47    0.25
  10   3  -4    1.32    0.23
  -9  -3   4    5.51    0.28
   9  -3  -4    5.19    0.32
  -9  -3   4    5.02    0.32
   9  -3  -4    5.25    0.34
  -9   3   4    5.44    0.32
  -9   3   4    5.16    0.34
   9   3  -4    4.97    0.33
   8  -3  -4    0.19    0.12
   8  -3  -4    0.10    0.12
  -8  -3   4    0.15    0.11
  -8  -3   4    0.10    0.09
   8   3  -4    0.08    0.11
  -8   3   4    0.05    0.11
  -8   3   4    0.04    0.10
  -7  -3   4   34.95    0.92
  -7  -3   4   34.42    0.88
   7  -3  -4   34.25    0.92
   7  -3  -4   34.74    0.81
   7   3  -4   34.88    0.79
  -7   3   4   34.54    0.95
  -7   3   4   35.74    0.90
  -7   3   4   34.56    0.80
   7   3  -4   35.18    0.95
   6  -3  -4   49.54    1.19
   6  -3  -4   49.71    1.09
  -6  -3   4   48.89    1.16
  -6  -3   4   49.14    1.17
   6   3  -4   47.96    1.05
   6   3  -4   48.69    1.20
  -6   3   4   49.83    1.15
  -6   3   4   50.09    1.21
  -6   3   4   49.81    1.09
  -5  -3   4   12.05    0.40
  -5  -3   4   12.54    0.40
   5  -3  -4   12.51    0.36
   5  -3  -4   12.73    0.42
   5   3  -4   11.18    0.41
  -5   3   4   12.10    0.41
   5   3  -4   12.28    0.32
  -5   3   4   12.68    0.35
  -5   3   4   12.08    0.42
  -5   3   4   12.07    0.38
   4  -3  -4    0.29    0.07
  -4  -3   4    0.21    0.07
   4  -3  -4    0.17    0.08
  -4  -3   4    0.19    0.08
  -4   3   4    0.17    0.08
  -4   3   4    0.24    0.07
   4   3  -4    0.22    0.05
  -4   3   4    0.17    0.06
   4   3  -4    0.43    0.10
  -4   3   4    0.10    0.07
  -3  -3   4   12.46    0.38
  -3  -3   4   12.29    0.35
   3  -3  -4   13.01    0.36
  -3   3   4   12.41    0.38
   3   3  -4   12.54    0.31
  -3   3   4   12.00    0.39
   3   3  -4   12.27    0.38
  -3   3   4   12.53    0.33
   2  -3  -4  138.47    2.75
  -2  -3   4  139.96    2.84
  -2  -3   4  139.55    2.77
   2  -3  -4  136.50    2.82
   2   3  -4  135.58    2.83
  -2   3   4  140.59    2.84
  -2   3   4  135.87    2.81
  -2   3   4  136.99    2.75
   2   3  -4  135.20    2.77
   1  -3  -4   70.82    1.45
  -1  -3   4   71.96    1.51
  -1  -3   4   72.65    1.54
  -1  -3   4   71.55    1.47
   1  -3  -4   72.95    1.54
   1   3  -4   71.37    1.54
  -1   3   4   72.07    1.52
   1   3  -4   73.21    1.47
   1   3  -4   72.70    1.51
  -1   3   4   72.84    1.55
   0  -3   4   15.63    0.41
   0  -3  -4   16.22    0.43
   0  -3   4   15.60    0.41
   0  -3  -4   15.30    0.35
   0   3   4   15.69    0.42
   0   3  -4   15.52    0.35
   0   3  -4   14.93    0.42
   0   3   4   15.35    0.40
   0   3  -4   15.21    0.41
   1  -3   4  105.58    2.23
  -1  -3  -4  109.63    2.24
  -1  -3  -4  106.53    2.16
   1  -3   4  108.40    2.20
   1   3   4  106.09    2.22
  -1   3  -4  110.39    2.25
  -1   3  -4  106.12    2.23
  -1   3  -4  107.11    2.15
   1   3   4  105.62    2.20
   2  -3   4   36.56    0.88
  -2  -3  -4   37.64    0.87
  -2  -3  -4   37.65    0.82
   2  -3   4   37.10    0.82
  -2   3  -4   37.47    0.81
   2   3   4   36.98    0.84
  -2   3  -4   35.96    0.87
   2   3   4   37.34    0.86
  -3  -3  -4    9.02    0.29
   3  -3   4    9.16    0.33
   3  -3   4    9.42    0.26
  -3  -3  -4    9.15    0.31
   3   3   4    9.08    0.30
   3   3   4    9.06    0.30
  -3   3  -4    9.11    0.32
  -3   3  -4    9.22    0.28
   4  -3   4   18.37    0.55
  -4  -3  -4   17.90    0.50
   4  -3   4   17.99    0.43
  -4  -3  -4   17.86    0.50
  -4   3  -4   18.70    0.54
   4   3   4   18.66    0.51
   4   3   4   18.65    0.50
  -4   3  -4   17.70    0.49
   5  -3   4    1.69    0.18
  -5  -3  -4    1.80    0.16
   5  -3   4    1.75    0.09
  -5  -3  -4    1.47    0.16
  -5   3  -4    1.81    0.18
   5   3   4    1.93    0.15
   5   3   4    1.61    0.16
  -6  -3  -4   14.41    0.48
   6  -3   4   13.24    0.49
  -6  -3  -4   14.84    0.45
   6   3   4   15.00    0.46
  -6   3  -4   14.90    0.47
  -6   3  -4   14.41    0.50
   6   3   4   14.14    0.48
   7  -3   4    0.14    0.11
  -7  -3  -4   -0.01    0.11
  -7  -3  -4   -0.01    0.08
  -7   3  -4   -0.09    0.10
   7   3   4    0.17    0.10
   7   3   4    0.21    0.09
  -7   3  -4   -0.04    0.10
  -8  -3  -4    0.82    0.13
   8  -3   4    0.43    0.16
  -8  -3  -4    0.42    0.14
  -8   3  -4    0.56    0.16
   8   3   4    0.64    0.13
   8   3   4    0.30    0.13
  -8   3  -4    0.40    0.13
  -9  -3  -4    2.51    0.27
   9  -3   4    2.75    0.29
   9  -3   4    2.32    0.28
   9   3   4    2.19    0.22
   9   3   4    2.34    0.27
  -9   3  -4    2.64    0.28
  -9   3  -4    1.85    0.26
  10  -3   4    3.17    0.33
  10  -3   4    2.82    0.31
 -10  -3  -4    2.60    0.30
 -10   3  -4    3.12    0.33
 -10   3  -4    3.14    0.31
  10   3   4    3.33    0.33
  11  -3   4    0.52    0.18
  11  -3   4    0.63    0.20
 -11  -3  -4    0.41    0.18
  11   3   4    0.53    0.20
 -11   3  -4    0.78    0.21
 -11   3  -4    0.65    0.20
  12  -3   4    0.78    0.23
  12  -3   4    0.39    0.21
 -12  -3  -4    0.69    0.22
 -12   3  -4    0.73    0.22
 -12   3  -4    0.67    0.23
  12   3   4    0.85    0.22
  12  -4  -4   -0.28    0.15
  12  -4  -4    0.11    0.17
 -12  -4   4    0.08    0.18
 -12   4   4    0.17    0.18
 -12   4   4   -0.04    0.16
  12   4  -4   -0.04    0.17
  11  -4  -4    0.35    0.18
 -11  -4   4    0.39    0.18
  11  -4  -4    0.40    0.18
  11   4  -4    0.46    0.19
 -11   4   4    0.09    0.17
 -11   4   4    0.41    0.17
  10  -4  -4    4.44    0.35
 -10  -4   4    4.99    0.34
  10  -4  -4    4.23    0.34
 -10   4   4    5.04    0.36
 -10   4   4    5.06    0.32
  10   4  -4    4.89    0.35
  -9  -4   4    0.36    0.14
   9  -4  -4    0.47    0.16
  -9  -4   4    0.48    0.13
   9   4  -4    0.34    0.15
  -9   4   4    0.47    0.15
  -9   4   4    0.23    0.14
  -8  -4   4    4.89    0.28
  -8  -4   4    5.90    0.33
   8  -4  -4    5.08    0.33
   8   4  -4    5.18    0.32
  -8   4   4    4.99    0.28
  -8   4   4    4.52    0.31
  -7  -4   4    2.93    0.22
   7  -4  -4    3.36    0.27
  -7  -4   4    3.01    0.22
   7  -4  -4    3.15    0.18
   7   4  -4    3.29    0.25
  -7   4   4    2.62    0.26
  -7   4   4    3.35    0.22
  -6  -4   4    3.30    0.22
  -6  -4   4    3.45    0.21
   6  -4  -4    3.31    0.18
   6  -4  -4    3.35    0.24
  -6   4   4    3.13    0.20
   6   4  -4    3.13    0.15
  -6   4   4    3.25    0.24
   6   4  -4    3.19    0.23
  -6   4   4    2.70    0.22
   5  -4  -4    3.32    0.18
  -5  -4   4    2.95    0.19
   5  -4  -4    3.38    0.22
  -5  -4   4    3.16    0.21
  -5   4   4    2.63    0.21
  -5   4   4    3.30    0.21
   5   4  -4    3.34    0.15
   5   4  -4    3.23    0.22
  -5   4   4    3.15    0.17
   4  -4  -4    0.08    0.06
   4  -4  -4    0.06    0.08
  -4  -4   4   -0.01    0.07
  -4  -4   4   -0.07    0.06
  -4   4   4    0.09    0.09
  -4   4   4   -0.01    0.05
   4   4  -4    0.03    0.05
  -4   4   4    0.06    0.07
   4   4  -4    0.03    0.07
   3  -4  -4    3.20    0.18
  -3  -4   4    3.17    0.15
  -3  -4   4    3.39    0.20
   3   4  -4    3.42    0.16
  -3   4   4    3.21    0.14
  -3   4   4    3.83    0.22
  -3   4   4    3.33    0.19
   3   4  -4    3.39    0.20
   2  -4  -4    0.37    0.09
   2  -4  -4    0.28    0.04
  -2  -4   4    0.27    0.06
  -2  -4   4    0.32    0.09
  -2   4   4    0.29    0.08
  -2   4   4    0.31    0.04
   2   4  -4    0.37    0.09
   2   4  -4    0.22    0.07
  -2   4   4    0.31    0.09
   1  -4  -4    3.23    0.18
  -1  -4   4    2.56    0.17
   1  -4  -4    2.97    0.09
  -1  -4   4    2.87    0.16
   1   4  -4    3.11    0.18
   1   4  -4    2.97    0.11
  -1   4   4    2.71    0.17
  -1   4   4    2.97    0.16
   0  -4  -4   43.13    0.88
   0  -4   4   41.83    1.00
   0  -4   4   43.31    1.00
   0  -4  -4   43.90    1.02
   0   4  -4   43.71    1.02
   0   4  -4   43.61    1.00
   0   4   4   42.94    1.01
   0   4  -4   42.42    0.89
   0   4   4   44.62    0.99
   1  -4   4   13.98    0.43
   1  -4   4   14.38    0.41
  -1  -4  -4   13.80    0.34
  -1  -4  -4   13.72    0.43
  -1   4  -4   13.80    0.43
  -1   4  -4   13.68    0.32
  -1   4  -4   14.49    0.43
   1   4   4   13.99    0.40
   1   4   4   13.68    0.41
   2  -4   4    8.93    0.29
   2  -4   4    7.95    0.32
  -2  -4  -4    8.87    0.26
  -2  -4  -4    8.68    0.32
   2   4   4    8.86    0.30
  -2   4  -4    8.89    0.33
   2   4   4    8.63    0.31
  -2   4  -4    8.47    0.33
  -2   4  -4    8.67    0.24
   3  -4   4   34.02    0.80
  -3  -4  -4   34.28    0.86
   3  -4   4   33.80    0.88
  -3  -4  -4   35.19    0.80
  -3   4  -4   34.60    0.78
  -3   4  -4   35.63    0.89
   3   4   4   34.11    0.84
   3   4   4   34.30    0.84
  -4  -4  -4    8.49    0.33
   4  -4   4    8.23    0.26
  -4  -4  -4    8.28    0.30
   4  -4   4    8.12    0.35
   4   4   4    8.18    0.31
  -4   4  -4    8.20    0.28
   4   4   4    8.43    0.31
  -4   4  -4    7.69    0.34
  -5  -4  -4    0.07    0.08
  -5  -4  -4    0.12    0.09
   5  -4   4    0.19    0.10
   5  -4   4    0.11    0.06
   5   4   4    0.22    0.09
  -5   4  -4    0.20    0.10
  -5   4  -4    0.14    0.08
   5   4   4    0.17    0.09
  -6  -4  -4    0.69    0.14
   6  -4   4    0.48    0.14
  -6  -4  -4    0.66    0.14
  -6   4  -4    0.76    0.13
   6   4   4    0.77    0.15
  -6   4  -4    0.96    0.16
   6   4   4    0.73    0.13
  -7  -4  -4    1.29    0.17
   7  -4   4    1.31    0.21
  -7  -4  -4    1.03    0.17
   7   4   4    1.26    0.19
   7   4   4    1.23    0.16
  -7   4  -4    0.88    0.17
  -7   4  -4    1.01    0.17
  -8  -4  -4    2.61    0.26
   8  -4   4    2.43    0.27
  -8  -4  -4    2.76    0.22
   8   4   4    2.06    0.24
  -8   4  -4    2.66    0.29
   8   4   4    2.43    0.20
  -8   4  -4    2.81    0.25
   9  -4   4    0.55    0.17
  -9  -4  -4    0.72    0.18
  -9   4  -4    0.59    0.17
  -9   4  -4    0.37    0.16
   9   4   4    0.58    0.17
 -10  -4  -4   13.84    0.58
  10  -4   4   12.26    0.58
  10  -4   4   12.54    0.58
 -10   4  -4   13.36    0.55
  10   4   4   12.07    0.56
 -10   4  -4   13.40    0.60
 -11  -4  -4    0.27    0.18
  11  -4   4   -0.03    0.15
  11  -4   4    0.04    0.17
  11   4   4   -0.02    0.16
 -11   4  -4    0.03    0.15
 -11   4  -4   -0.01    0.15
  12  -4   4    1.02    0.25
 -12  -4  -4    0.67    0.22
  12  -4   4    0.45    0.20
  12   4   4    0.75    0.22
 -12   4  -4    0.68    0.23
 -12   4  -4    0.69    0.23
 -12  -5   4    3.13    0.36
  12  -5  -4    2.64    0.35
  12  -5  -4    2.69    0.36
  12   5  -4    2.37    0.34
 -12   5   4    3.42    0.41
  11  -5  -4   -0.04    0.17
  11  -5  -4    0.16    0.18
 -11  -5   4   -0.22    0.15
 -11   5   4    0.16    0.19
  11   5  -4    0.09    0.17
 -11   5   4    0.23    0.15
  10  -5  -4    3.03    0.34
 -10  -5   4    3.05    0.31
 -10  -5   4    2.77    0.28
 -10   5   4    3.14    0.30
 -10   5   4    2.57    0.32
  10   5  -4    2.88    0.34
  -9  -5   4    0.72    0.18
   9  -5  -4    1.14    0.22
  -9  -5   4    0.77    0.17
   9   5  -4    1.03    0.21
  -9   5   4    0.64    0.19
  -9   5   4    1.01    0.17
  -8  -5   4    0.39    0.13
   8  -5  -4    0.50    0.17
  -8  -5   4    0.28    0.15
  -8   5   4    0.22    0.13
   8   5  -4    0.19    0.14
  -8   5   4    0.22    0.12
   7  -5  -4    0.13    0.09
  -7  -5   4   -0.16    0.10
  -7  -5   4   -0.04    0.11
   7  -5  -4    0.04    0.12
  -7   5   4   -0.06    0.09
  -7   5   4    0.05    0.12
   7   5  -4    0.03    0.13
   6  -5  -4    4.38    0.30
  -6  -5   4    5.19    0.27
   6  -5  -4    5.46    0.26
  -6  -5   4    5.27    0.30
  -6   5   4    5.03    0.33
  -6   5   4    5.12    0.30
   6   5  -4    4.81    0.30
  -6   5   4    4.67    0.24
   6   5  -4    5.17    0.22
   5  -5  -4    0.05    0.10
  -5  -5   4   -0.01    0.09
  -5  -5   4   -0.08    0.07
   5  -5  -4    0.04    0.08
   5   5  -4    0.05    0.10
   5   5  -4    0.05    0.06
  -5   5   4   -0.05    0.08
  -5   5   4   -0.04    0.06
  -5   5   4   -0.08    0.10
  -4  -5   4   68.01    1.46
   4  -5  -4   67.04    1.51
   4  -5  -4   67.17    1.58
  -4  -5   4   65.98    1.55
  -4   5   4   67.94    1.41
  -4   5   4   65.86    1.57
  -4   5   4   67.37    1.55
   4   5  -4   66.74    1.45
   4   5  -4   65.92    1.56
   3  -5  -4   16.58    0.51
  -3  -5   4   16.48    0.44
  -3  -5   4   16.38    0.53
   3  -5  -4   16.81    0.40
  -3   5   4   15.66    0.53
  -3   5   4   16.40    0.39
  -3   5   4   17.72    0.53
   3   5  -4   17.32    0.47
   3   5  -4   16.31    0.52
  -2  -5   4    0.03    0.04
   2  -5  -4    0.05    0.03
   2  -5  -4    0.05    0.07
  -2  -5   4    0.08    0.08
   2   5  -4    0.02    0.07
   2   5  -4    0.05    0.08
  -2   5   4   -0.02    0.08
  -2   5   4    0.09    0.08
   2   5  -4    0.02    0.05
  -1  -5   4    2.32    0.17
  -1  -5   4    2.37    0.18
   1  -5  -4    2.55    0.18
   1   5  -4    2.49    0.10
  -1   5   4    2.68    0.19
   1   5  -4    2.27    0.16
   1   5  -4    2.61    0.19
  -1   5   4    2.43    0.17
   0  -5   4   12.01    0.41
   0  -5  -4   12.97    0.44
   0  -5   4   12.53    0.42
   0  -5  -4   13.03    0.27
   0   5  -4   12.13    0.41
   0   5   4   13.14    0.43
   0   5  -4   13.20    0.28
   0   5   4   12.91    0.41
   0   5  -4   12.57    0.28
   0   5  -4   12.29    0.43
  -1  -5  -4    9.63    0.24
   1  -5   4    9.49    0.34
  -1  -5  -4    9.18    0.36
   1  -5   4    9.15    0.35
   1   5   4    9.58    0.35
  -1   5  -4    9.48    0.22
  -1   5  -4    9.37    0.36
  -1   5  -4    8.76    0.35
   1   5   4    9.04    0.33
  -2  -5  -4   16.57    0.41
   2  -5   4   16.82    0.48
   2  -5   4   15.42    0.52
  -2  -5  -4   15.52    0.51
  -2   5  -4   15.95    0.52
   2   5   4   16.42    0.49
  -2   5  -4   16.80    0.53
   2   5   4   16.10    0.50
  -2   5  -4   16.71    0.38
   3  -5   4    0.87    0.15
  -3  -5  -4    0.85    0.14
  -3  -5  -4    1.06    0.11
   3  -5   4    0.85    0.12
  -3   5  -4    0.70    0.13
   3   5   4    0.84    0.13
  -3   5  -4    0.87    0.09
   3   5   4    0.87    0.13
  -4  -5  -4    3.45    0.24
   4  -5   4    3.49    0.19
  -4  -5  -4    3.64    0.19
   4  -5   4    3.24    0.24
   4   5   4    3.56    0.21
   4   5   4    3.26    0.21
  -4   5  -4    3.44    0.17
  -4   5  -4    3.32    0.23
  -5  -5  -4   29.91    0.77
   5  -5   4   29.05    0.71
  -5  -5  -4   28.76    0.81
   5  -5   4   29.65    0.86
  -5   5  -4   29.46    0.73
  -5   5  -4   29.09    0.84
   5   5   4   29.39    0.81
   5   5   4   29.00    0.78
  -6  -5  -4    2.80    0.22
  -6  -5  -4    2.63    0.22
   6  -5   4    2.40    0.26
   6   5   4    3.14    0.24
   6   5   4    2.63    0.21
  -6   5  -4    2.17    0.25
  -6   5  -4    2.66    0.19
   7  -5   4    3.81    0.31
  -7  -5  -4    4.03    0.28
  -7  -5  -4    4.05    0.27
   7   5   4    4.03    0.28
  -7   5  -4    3.39    0.29
  -7   5  -4    3.87    0.25
   7   5   4    4.27    0.25
  -8  -5  -4    8.73    0.40
   8  -5   4    9.73    0.48
  -8  -5  -4    8.58    0.42
  -8   5  -4    8.15    0.44
   8   5   4    9.56    0.44
  -8   5  -4    8.61    0.39
   8   5   4    8.63    0.37
  -9  -5  -4    1.97    0.26
   9  -5   4    1.92    0.28
  -9   5  -4    1.39    0.24
  -9   5  -4    1.79    0.23
   9   5   4    1.82    0.26
 -10  -5  -4    6.66    0.42
  10  -5   4    5.49    0.43
 -10   5  -4    5.70    0.37
 -10   5  -4    5.57    0.41
  10   5   4    6.00    0.41
 -11  -5  -4   -0.05    0.15
  11  -5   4   -0.07    0.15
  11  -5   4    0.22    0.18
  11   5   4    0.42    0.19
 -11   5  -4    0.20    0.18
 -11   5  -4    0.28    0.17
 -11  -6   4    0.76    0.22
  11  -6  -4    0.51    0.23
  11  -6  -4    0.29    0.20
  11   6  -4    0.50    0.21
 -11   6   4    0.72    0.25
 -10  -6   4    1.45    0.25
 -10  -6   4    1.54    0.24
  10  -6  -4    1.35    0.26
  10   6  -4    1.95    0.29
 -10   6   4    1.47    0.28
  -9  -6   4    3.56    0.29
  -9  -6   4    3.43    0.28
   9  -6  -4    2.91    0.34
  -9   6   4    3.53    0.36
   9   6  -4    3.93    0.37
   8  -6  -4   -0.06    0.13
  -8  -6   4   -0.23    0.11
  -8  -6   4   -0.19    0.11
   8   6  -4   -0.08    0.14
  -8   6   4    0.12    0.14
  -7  -6   4    6.88    0.33
   7  -6  -4    6.49    0.41
  -7  -6   4    6.10    0.36
  -7   6   4    6.25    0.37
   7   6  -4    5.57    0.36
  -6  -6   4    3.89    0.24
  -6  -6   4    4.43    0.30
   6  -6  -4    4.09    0.25
   6  -6  -4    3.63    0.30
  -6   6   4    3.81    0.28
   6   6  -4    3.93    0.29
  -6   6   4    3.53    0.30
   5  -6  -4    5.60    0.34
  -5  -6   4    5.08    0.25
   5  -6  -4    5.59    0.29
  -5  -6   4    5.34    0.32
   5   6  -4    5.61    0.32
  -5   6   4    4.81    0.32
  -5   6   4    5.40    0.31
   5   6  -4    5.01    0.24
   4  -6  -4    2.28    0.25
   4  -6  -4    3.06    0.21
  -4  -6   4    2.34    0.16
  -4  -6   4    2.32    0.24
   4   6  -4    2.63    0.18
  -4   6   4    2.00    0.23
   4   6  -4    2.97    0.27
  -4   6   4    2.35    0.24
   3  -6  -4    6.94    0.35
  -3  -6   4    7.52    0.35
  -3  -6   4    7.35    0.25
   3  -6  -4    6.98    0.32
  -3   6   4    6.96    0.35
   3   6  -4    7.31    0.30
   3   6  -4    7.27    0.35
  -3   6   4    7.59    0.35
   2  -6  -4    1.14    0.16
  -2  -6   4    1.24    0.18
  -2   6   4    1.49    0.19
   2   6  -4    1.02    0.16
  -2   6   4    1.30    0.17
   2   6  -4    1.44    0.17
  -1  -6   4   17.41    0.57
  -1  -6   4   18.33    0.55
   1  -6  -4   18.50    0.58
   1   6  -4   17.83    0.58
  -1   6   4   17.41    0.57
  -1   6   4   18.48    0.56
   1   6  -4   18.15    0.55
   0  -6   4    0.20    0.13
   0  -6   4    0.28    0.11
   0  -6  -4    0.29    0.12
   0   6   4    0.27    0.10
   0   6  -4    0.23    0.11
   0   6   4    0.34    0.13
   0   6  -4    0.15    0.12
  -1  -6  -4   10.55    0.42
   1  -6   4   10.19    0.41
   1  -6   4   10.82    0.41
   1   6   4   10.42    0.41
   1   6   4   10.62    0.39
  -1   6  -4   10.53    0.42
  -1   6  -4   10.89    0.42
   2  -6   4    5.72    0.28
  -2  -6  -4    6.00    0.32
   2  -6   4    5.57    0.31
  -2  -6  -4    6.00    0.20
  -2   6  -4    5.80    0.31
   2   6   4    5.80    0.29
   2   6   4    5.77    0.28
  -2   6  -4    6.10    0.32
  -3  -6  -4    0.35    0.08
   3  -6   4    0.36    0.14
   3  -6   4    0.48    0.12
  -3  -6  -4    0.50    0.14
   3   6   4    0.50    0.13
  -3   6  -4    0.42    0.14
   3   6   4    0.55    0.12
   4  -6   4    0.57    0.12
  -4  -6  -4    0.69    0.15
   4  -6   4    0.39    0.15
  -4  -6  -4    0.61    0.11
   4   6   4    0.63    0.13
  -4   6  -4    0.79    0.16
   4   6   4    0.64    0.14
  -5  -6  -4    1.27    0.19
   5  -6   4    1.32    0.16
  -5  -6  -4    1.34    0.16
   5  -6   4    1.57    0.23
   5   6   4    1.39    0.19
  -5   6  -4    1.30    0.21
   5   6   4    1.03    0.16
   6  -6   4   23.18    0.78
  -6  -6  -4   23.06    0.66
  -6  -6  -4   22.12    0.71
   6   6   4   22.28    0.67
   6   6   4   22.37    0.71
  -6   6  -4   21.50    0.75
  -7  -6  -4   17.17    0.61
  -7  -6  -4   17.99    0.59
   7  -6   4   15.58    0.66
   7   6   4   17.53    0.63
   7   6   4   17.27    0.57
  -7   6  -4   16.97    0.66
  -8  -6  -4    0.27    0.15
   8  -6   4    0.20    0.18
  -8  -6  -4    0.42    0.16
  -8   6  -4    0.20    0.16
   8   6   4    0.08    0.14
  -9  -6  -4    2.38    0.28
  -9  -6  -4    2.08    0.27
   9  -6   4    2.28    0.32
   9   6   4    2.21    0.30
  -9   6  -4    1.75    0.29
  10  -6   4    0.05    0.20
 -10  -6  -4    0.33    0.17
 -10   6  -4    0.25    0.19
  10   6   4   -0.03    0.15
 -11  -6  -4    0.01    0.16
  11  -6   4    0.12    0.20
 -11   6  -4    0.17    0.18
  11   6   4    0.08    0.19
  10  -7  -4    0.73    0.25
 -10  -7   4    0.57    0.21
  10   7  -4    1.02    0.24
 -10   7   4    0.22    0.21
  -9  -7   4   -0.17    0.12
   9  -7  -4   -0.08    0.16
   9   7  -4   -0.11    0.15
  -9   7   4   -0.11    0.15
   8  -7  -4    0.26    0.17
  -8  -7   4    0.57    0.20
   8   7  -4    0.37    0.18
  -8   7   4    0.43    0.20
   7  -7  -4    1.16    0.24
  -7  -7   4    1.97    0.27
  -7   7   4    1.72    0.26
   7   7  -4    1.30    0.24
  -6  -7   4   14.24    0.58
   6  -7  -4   14.42    0.51
   6  -7  -4   14.28    0.60
  -6   7   4   12.73    0.55
   6   7  -4   14.63    0.59
  -6   7   4   13.31    0.59
  -5  -7   4    1.94    0.26
   5  -7  -4    2.08    0.23
   5  -7  -4    1.65    0.25
   5   7  -4    1.81    0.24
  -5   7   4    1.97    0.25
  -5   7   4    1.46    0.24
  -4  -7   4    6.45    0.37
   4  -7  -4    7.83    0.41
   4  -7  -4    7.50    0.35
   4   7  -4    7.95    0.40
   4   7  -4    7.94    0.33
  -4   7   4    7.14    0.37
  -4   7   4    7.80    0.41
  -3  -7   4    1.40    0.21
   3  -7  -4    1.38    0.22
   3  -7  -4    1.69    0.21
   3   7  -4    1.48    0.18
  -3   7   4    1.23    0.19
   3   7  -4    1.71    0.23
  -3   7   4    1.59    0.23
  -2  -7   4    7.73    0.35
  -2  -7   4    7.66    0.38
   2  -7  -4    8.53    0.39
  -2   7   4    7.80    0.37
   2   7  -4    8.56    0.36
  -2   7   4    8.33    0.40
   2   7  -4    8.22    0.39
  -1  -7   4   15.93    0.53
  -1  -7   4   14.82    0.55
   1  -7  -4   15.42    0.55
   1   7  -4   15.96    0.56
  -1   7   4   15.52    0.54
   1   7  -4   15.82    0.53
  -1   7   4   15.50    0.56
   0  -7   4    5.82    0.32
   0  -7   4    5.73    0.31
   0  -7  -4    5.70    0.33
   0   7   4    5.85    0.31
   0   7  -4    6.36    0.32
   0   7   4    6.19    0.34
   0   7  -4    6.06    0.33
  -1  -7  -4   65.68    1.60
   1  -7   4   64.76    1.59
   1  -7   4   66.53    1.57
  -1   7  -4   67.27    1.60
   1   7   4   65.08    1.57
  -1   7  -4   66.19    1.60
   1   7   4   67.20    1.57
   2  -7   4    6.18    0.31
  -2  -7  -4    5.72    0.33
   2  -7   4    6.06    0.34
   2   7   4    6.05    0.32
  -2   7  -4    6.11    0.35
  -2   7  -4    5.60    0.33
   2   7   4    6.08    0.32
   3  -7   4   28.38    0.80
  -3  -7  -4   28.14    0.86
   3  -7   4   28.45    0.88
   3   7   4   29.24    0.83
  -3   7  -4   29.46    0.88
   3   7   4   28.34    0.82
   4  -7   4    0.11    0.13
  -4  -7  -4    0.16    0.13
   4  -7   4    0.10    0.11
  -4   7  -4    0.13    0.13
   4   7   4   -0.04    0.12
   4   7   4    0.16    0.11
  -5  -7  -4    4.09    0.31
   5  -7   4    4.91    0.35
   5  -7   4    4.91    0.28
  -5   7  -4    4.55    0.34
   5   7   4    5.05    0.31
   5   7   4    5.13    0.30
  -6  -7  -4    0.11    0.13
   6  -7   4    0.10    0.15
  -6   7  -4    0.01    0.14
   6   7   4    0.16    0.12
   6   7   4    0.26    0.14
  -7  -7  -4    0.30    0.15
   7  -7   4    0.16    0.17
   7   7   4    0.11    0.17
  -7   7  -4    0.17    0.16
   8  -7   4    8.82    0.52
  -8  -7  -4    9.40    0.47
  -8   7  -4    9.18    0.51
   8   7   4    9.07    0.49
   9  -7   4    1.97    0.32
  -9  -7  -4    1.65    0.26
  -9   7  -4    1.59    0.28
   9   7   4    2.11    0.29
  10  -7   4    1.66    0.31
  10   7   4    1.30    0.27
 -10   7  -4    1.04    0.28
   9  -8  -4    0.52    0.23
  -9  -8   4    0.58    0.21
   9   8  -4    0.67    0.23
  -9   8   4    0.43    0.22
  -8  -8   4    1.54    0.29
   8  -8  -4    0.81    0.24
  -8   8   4    1.17    0.25
   8   8  -4    0.97    0.24
   7  -8  -4    0.42    0.21
  -7  -8   4    0.51    0.18
   7   8  -4    0.62    0.21
  -7   8   4    0.42    0.21
  -6  -8   4    2.14    0.29
   6  -8  -4    1.99    0.29
   6  -8  -4    1.76    0.23
  -6   8   4    2.47    0.30
   6   8  -4    2.28    0.29
  -6   8   4    2.26    0.31
   5  -8  -4    3.03    0.29
  -5  -8   4    2.71    0.31
   5  -8  -4    2.85    0.33
   5   8  -4    3.02    0.33
  -5   8   4    2.48    0.31
  -5   8   4    2.79    0.32
  -4  -8   4   -0.05    0.13
   4  -8  -4    0.24    0.16
   4  -8  -4    0.08    0.13
  -4   8   4   -0.01    0.13
   4   8  -4    0.09    0.13
   4   8  -4    0.05    0.12
  -4   8   4    0.08    0.15
  -3  -8   4    1.48    0.20
   3  -8  -4    1.26    0.23
  -3  -8   4    1.12    0.21
   3  -8  -4    1.44    0.22
   3   8  -4    1.64    0.21
   3   8  -4    1.28    0.22
  -3   8   4    1.42    0.22
  -3   8   4    1.09    0.21
   2  -8  -4    2.72    0.30
  -2  -8   4    3.40    0.32
   2  -8  -4    2.86    0.29
  -2  -8   4    3.56    0.27
  -2   8   4    3.40    0.27
   2   8  -4    3.34    0.26
   2   8  -4    3.31    0.31
  -2   8   4    3.74    0.30
  -1  -8   4    0.12    0.13
  -1  -8   4    0.06    0.12
   1  -8  -4    0.15    0.15
  -1   8   4    0.13    0.13
   1   8  -4    0.10    0.13
   1   8  -4    0.20    0.13
  -1   8   4   -0.11    0.13
   0  -8   4    8.18    0.41
   0  -8   4    7.87    0.40
   0  -8  -4    7.43    0.40
   0   8   4    7.94    0.41
   0   8   4    8.82    0.41
   0   8  -4    8.23    0.42
   0   8  -4    8.29    0.40
   1  -8   4    0.78    0.18
  -1  -8  -4    0.60    0.17
   1  -8   4    0.61    0.18
   1   8   4    0.41    0.15
  -1   8  -4    0.56    0.17
  -1   8  -4    0.38    0.17
   1   8   4    0.41    0.14
  -2  -8  -4    1.12    0.21
   2  -8   4    1.23    0.22
   2  -8   4    1.36    0.20
  -2   8  -4    1.59    0.24
   2   8   4    1.24    0.20
   2   8   4    1.49    0.22
  -2   8  -4    1.17    0.21
  -3  -8  -4    0.91    0.20
   3  -8   4    1.34    0.23
   3  -8   4    0.93    0.17
  -3   8  -4    1.19    0.22
   3   8   4    1.01    0.19
   3   8   4    1.26    0.21
  -4  -8  -4   11.90    0.53
   4  -8   4   11.58    0.55
   4  -8   4   11.80    0.47
  -4   8  -4   11.65    0.54
   4   8   4   12.11    0.49
   4   8   4   11.65    0.50
  -5  -8  -4    1.10    0.22
   5  -8   4    0.82    0.22
   5   8   4    1.17    0.20
  -5   8  -4    0.60    0.19
   5   8   4    0.74    0.19
   6  -8   4   -0.19    0.16
  -6  -8  -4    0.12    0.14
  -6   8  -4   -0.09    0.13
   6   8   4   -0.01    0.14
   7  -8   4    2.02    0.32
  -7  -8  -4    1.81    0.28
   7   8   4    2.13    0.30
  -7   8  -4    1.45    0.27
  -8  -8  -4    2.44    0.32
   8  -8   4    1.53    0.30
   8   8   4    2.36    0.33
  -8   8  -4    2.52    0.34
  -9  -8  -4    1.15    0.25
   9  -8   4    1.82    0.34
   9   8   4    0.88    0.26
  -9   8  -4    1.22    0.29
  -8  -9   4    2.88    0.38
   8  -9  -4    2.43    0.36
  -8   9   4    2.78    0.37
   8   9  -4    2.55    0.35
  -7  -9   4    0.47    0.22
   7  -9  -4    0.56    0.23
  -7   9   4    0.83    0.23
   7   9  -4    0.77    0.23
   6  -9  -4    6.74    0.47
  -6  -9   4    7.15    0.48
   6   9  -4    7.20    0.45
  -6   9   4    7.04    0.45
  -6   9   4    6.39    0.47
   5  -9  -4   -0.10    0.14
  -5  -9   4   -0.03    0.17
   5  -9  -4   -0.10    0.16
  -5   9   4    0.14    0.16
   5   9  -4    0.08    0.17
  -5   9   4    0.15    0.18
   4  -9  -4    9.38    0.51
   4  -9  -4    8.12    0.43
  -4  -9   4    9.08    0.49
  -4   9   4    8.55    0.46
   4   9  -4    8.89    0.48
  -4   9   4    8.92    0.50
   3  -9  -4    0.64    0.20
   3  -9  -4    1.10    0.23
  -3  -9   4    1.16    0.23
  -3  -9   4    0.81    0.21
  -3   9   4    1.22    0.25
   3   9  -4    1.10    0.23
  -3   9   4    1.21    0.24
   3   9  -4    1.08    0.20
   2  -9  -4    0.25    0.15
   2  -9  -4    0.61    0.20
  -2  -9   4    0.58    0.18
  -2  -9   4    0.45    0.17
  -2   9   4    0.82    0.19
   2   9  -4    0.47    0.17
  -2   9   4    0.66    0.19
   2   9  -4    0.65    0.20
  -1  -9   4    0.26    0.16
   1  -9  -4    0.32    0.17
  -1  -9   4    0.17    0.14
   1   9  -4    0.59    0.19
  -1   9   4    0.22    0.16
   1   9  -4    0.26    0.15
  -1   9   4    0.20    0.15
   0  -9  -4    4.09    0.38
   0  -9   4    4.25    0.33
   0  -9   4    4.85    0.34
   0   9  -4    4.18    0.32
   0   9   4    4.06    0.32
   0   9   4    4.52    0.32
   0   9  -4    4.61    0.35
  -1  -9  -4    5.51    0.38
   1  -9   4    6.09    0.40
   1  -9   4    6.16    0.38
   1   9   4    5.35    0.35
  -1   9  -4    5.28    0.39
   1   9   4    6.00    0.37
  -1   9  -4    5.56    0.38
  -2  -9  -4    0.07    0.14
   2  -9   4    0.08    0.15
   2  -9   4    0.08    0.13
   2   9   4    0.00    0.14
   2   9   4    0.01    0.13
  -2   9  -4   -0.05    0.14
  -2   9  -4    0.13    0.16
  -3  -9  -4    1.45    0.26
   3  -9   4    1.19    0.25
   3  -9   4    1.10    0.21
   3   9   4    1.06    0.22
  -3   9  -4    1.05    0.23
   3   9   4    1.29    0.22
   4  -9   4    0.11    0.17
   4  -9   4    0.05    0.14
  -4  -9  -4    0.21    0.18
   4   9   4    0.23    0.17
   4   9   4    0.42    0.17
  -4   9  -4    0.16    0.18
  -5  -9  -4    1.42    0.26
   5  -9   4    1.20    0.26
   5   9   4    1.58    0.26
   5   9   4    1.29    0.23
  -5   9  -4    1.47    0.27
  -6  -9  -4    0.27    0.17
   6  -9   4    0.19    0.20
  -6   9  -4    0.15    0.17
   6   9   4    0.05    0.17
  -7  -9  -4    1.12    0.27
   7  -9   4    1.41    0.31
  -7   9  -4    1.37    0.29
   7   9   4    1.14    0.27
   8  -9   4    0.45    0.23
  -8  -9  -4    0.14    0.22
  -8   9  -4    0.25    0.21
   8   9   4    0.43    0.22
  -6 -10   4    1.12    0.27
   6 -10  -4    1.66    0.33
  -6  10   4    1.86    0.31
   6  10  -4    1.61    0.30
   5 -10  -4    0.21    0.19
   5 -10  -4    0.01    0.17
  -5 -10   4    0.13    0.19
  -5  10   4    0.33    0.21
  -5  10   4    0.06    0.18
   5  10  -4    0.42    0.22
   4 -10  -4   -0.03    0.14
   4 -10  -4    0.04    0.17
  -4 -10   4   -0.20    0.15
  -4  10   4    0.05    0.18
  -4  10   4    0.05    0.18
   4  10  -4    0.09    0.17
  -3 -10   4    0.12    0.17
   3 -10  -4    0.08    0.18
   3 -10  -4   -0.11    0.14
  -3  10   4    0.17    0.19
   3  10  -4   -0.04    0.15
  -3  10   4    0.17    0.17
  -2 -10   4   -0.16    0.14
  -2 -10   4    0.14    0.16
   2 -10  -4    0.13    0.16
   2 -10  -4    0.25    0.18
  -2  10   4    0.30    0.19
   2  10  -4   -0.06    0.15
  -2  10   4    0.00    0.16
   2  10  -4    0.28    0.19
   1 -10  -4    0.14    0.16
  -1 -10   4    0.24    0.18
  -1 -10   4    0.03    0.15
   1 -10  -4   -0.10    0.15
  -1  10   4   -0.02    0.16
   1  10  -4    0.06    0.16
   1  10  -4   -0.06    0.14
  -1  10   4   -0.06    0.14
   0 -10   4    0.23    0.16
   0 -10  -4    0.19    0.17
   0 -10   4    0.11    0.18
   0  10   4    0.11    0.16
   0  10  -4   -0.04    0.14
   0  10   4    0.19    0.17
   0  10  -4   -0.16    0.16
   1 -10   4    0.16    0.16
   1 -10   4    0.00    0.14
  -1 -10  -4   -0.15    0.14
  -1  10  -4    0.23    0.17
  -1  10  -4   -0.03    0.17
   1  10   4   -0.02    0.14
   1  10   4    0.10    0.17
  -2 -10  -4    0.44    0.19
   2 -10   4    0.19    0.18
   2 -10   4    0.64    0.21
   2  10   4    0.53    0.19
  -2  10  -4    0.37    0.19
  -2  10  -4    0.43    0.20
   2  10   4    0.61    0.19
  -3 -10  -4    0.00    0.16
   3 -10   4    0.04    0.20
   3 -10   4    0.06    0.14
   3  10   4    0.17    0.17
  -3  10  -4    0.18    0.18
   3  10   4    0.25    0.18
   4 -10   4   -0.19    0.16
  -4 -10  -4   -0.28    0.15
   4  10   4    0.05    0.16
   4  10   4    0.08    0.17
  -4  10  -4   -0.09    0.16
   5 -10   4    0.29    0.22
  -5 -10  -4    0.30    0.19
  -5  10  -4   -0.14    0.16
   5  10   4   -0.18    0.17
  -6 -10  -4    1.71    0.31
   6 -10   4    1.78    0.34
   6  10   4    2.09    0.32
  -6  10  -4    1.70    0.32
  -3 -11   4    0.18    0.20
   3 -11  -4    0.24    0.19
   3 -11  -4    0.42    0.23
   3  11  -4    0.11    0.18
  -3  11   4    0.25    0.21
  -3  11   4    0.38    0.22
   2 -11  -4    2.89    0.39
   2 -11  -4    2.66    0.36
  -2 -11   4    2.41    0.34
  -2  11   4    3.03    0.36
  -2  11   4    2.07    0.34
   2  11  -4    2.63    0.36
  -1 -11   4    3.38    0.38
  -1 -11   4    3.84    0.41
   1 -11  -4    2.97    0.38
   1 -11  -4    2.92    0.36
   1  11  -4    3.54    0.40
   1  11  -4    3.90    0.41
  -1  11   4    2.80    0.37
  -1  11   4    2.90    0.36
   0 -11  -4    0.00    0.17
   0 -11   4   -0.01    0.17
   0 -11   4   -0.10    0.17
   0 -11  -4    0.19    0.19
   0  11   4   -0.10    0.16
   0  11  -4   -0.07    0.18
   0  11   4    0.05    0.16
   0  11  -4   -0.13    0.17
  -1 -11  -4    0.77    0.26
   1 -11   4    0.78    0.25
  -1 -11  -4    0.92    0.25
   1 -11   4    0.75    0.24
   1  11   4    0.81    0.25
   1  11   4    1.23    0.26
  -1  11  -4    0.84    0.24
  -1  11  -4    1.23    0.28
  -2 -11  -4    0.71    0.24
   2 -11   4    0.86    0.26
   2 -11   4    1.02    0.25
   2  11   4    0.67    0.23
   2  11   4    0.58    0.23
  -2  11  -4    1.01    0.26
  13   0  -5    0.03    0.17
 -13   0   5   -0.02    0.19
 -12   0   5    0.05    0.15
  12   0  -5    0.02    0.16
 -11   0   5    0.02    0.13
  11   0  -5    0.17    0.15
  10   0  -5    0.40    0.15
 -10   0   5    0.39    0.15
  -9   0   5   -0.03    0.10
   9   0  -5    0.01    0.08
   9   0  -5    0.04    0.11
  -8   0   5    0.02    0.06
   8   0  -5   -0.04    0.09
   8   0  -5    0.05    0.08
  -8   0   5   -0.10    0.09
  -7   0   5    0.03    0.09
  -7   0   5   -0.04    0.05
   7   0  -5   -0.03    0.06
   7   0  -5   -0.01    0.08
   6   0  -5   -0.02    0.05
  -6   0   5   -0.11    0.07
  -6   0   5    0.01    0.05
   6   0  -5    0.05    0.07
  -5   0   5    0.08    0.05
   5   0  -5    0.00    0.06
  -5   0   5   -0.13    0.06
   5   0  -5   -0.02    0.05
   4   0  -5    0.23    0.07
  -4   0   5    0.12    0.05
  -4   0   5   -0.10    0.07
   3   0  -5   -0.16    0.03
  -3   0   5   -0.25    0.04
  -3   0   5   -0.21    0.03
  -3   0   5   -0.19    0.04
   3   0  -5   -0.17    0.04
   2   0  -5   -0.43    0.03
  -2   0   5   -0.43    0.04
  -2   0   5   -0.40    0.03
  -2   0   5   -0.38    0.04
  -1   0   5   -0.03    0.03
  -1   0   5   -0.08    0.03
  -1   0   5   -0.10    0.02
   1   0  -5   -0.13    0.03
   1   0  -5   -0.05    0.02
   0   0   5   -0.09    0.02
   0   0  -5   -0.16    0.02
   0   0   5   -0.16    0.03
   0   0   5   -0.15    0.03
  -1   0  -5   -0.68    0.03
  -1   0  -5   -0.53    0.05
   1   0   5   -0.61    0.03
   1   0   5   -0.58    0.05
  -2   0  -5   -0.05    0.04
  -2   0  -5   -0.03    0.02
  -2   0  -5   -0.08    0.03
   2   0   5   -0.13    0.04
   2   0   5   -0.05    0.02
  -3   0  -5   -0.03    0.02
  -3   0  -5   -0.06    0.05
   3   0   5    0.00    0.04
  -3   0  -5   -0.02    0.04
   3   0   5   -0.03    0.05
   4   0   5   -0.04    0.05
  -4   0  -5    0.03    0.02
   4   0   5    0.02    0.05
  -4   0  -5    0.00    0.05
  -4   0  -5    0.02    0.06
  -5   0  -5    0.01    0.07
  -5   0  -5   -0.06    0.03
   5   0   5    0.02    0.06
   5   0   5    0.13    0.07
  -5   0  -5    0.08    0.07
  -6   0  -5    0.06    0.08
   6   0   5    0.05    0.07
   6   0   5   -0.12    0.08
  -6   0  -5   -0.05    0.03
  -6   0  -5    0.17    0.09
  -7   0  -5   -0.05    0.09
  -7   0  -5   -0.01    0.09
   7   0   5    0.01    0.09
   7   0   5    0.00    0.09
   8   0   5    0.22    0.11
   8   0   5    0.15    0.10
  -8   0  -5    0.09    0.11
  -8   0  -5    0.12    0.12
   9   0   5    0.18    0.12
  -9   0  -5   -0.08    0.11
   9   0   5   -0.05    0.11
 -10   0  -5   -0.04    0.12
  10   0   5   -0.23    0.09
  10   0   5   -0.04    0.12
 -11   0  -5    0.11    0.17
  11   0   5   -0.07    0.11
  11   0   5    0.03    0.16
  12   0   5   -0.04    0.15
 -12   0  -5    0.10    0.17
  13   0   5   -0.07    0.17
 -13   0  -5    0.07    0.18
 -13  -1   5    0.94    0.25
  13  -1  -5    1.28    0.27
  13   1  -5    0.86    0.25
 -13   1   5    0.94    0.24
  12  -1  -5    6.71    0.44
 -12  -1   5    8.03    0.46
  12   1  -5    6.81    0.46
 -12   1   5    6.96    0.44
  11  -1  -5   -0.07    0.13
 -11  -1   5    0.09    0.15
 -11   1   5    0.29    0.17
  11   1  -5    0.10    0.15
  10  -1  -5   12.24    0.53
 -10  -1   5   12.18    0.53
  10  -1  -5   12.56    0.47
 -10   1   5   12.20    0.52
  10   1  -5   11.66    0.52
  -9  -1   5    4.91    0.24
  -9  -1   5    5.05    0.32
   9  -1  -5    5.48    0.33
   9  -1  -5    4.43    0.26
   9   1  -5    4.62    0.31
  -9   1   5    4.59    0.31
  -9   1   5    4.92    0.31
  -8  -1   5   13.04    0.49
   8  -1  -5   11.92    0.48
  -8  -1   5   13.48    0.41
   8  -1  -5   13.51    0.44
   8   1  -5   13.00    0.39
  -8   1   5   13.44    0.38
  -8   1   5   14.00    0.50
  -8   1   5   14.42    0.52
   8   1  -5   13.45    0.50
  -7  -1   5   18.56    0.60
   7  -1  -5   20.31    0.55
   7  -1  -5   19.71    0.61
  -7  -1   5   20.06    0.53
  -7   1   5   19.54    0.61
   7   1  -5   20.29    0.50
  -7   1   5   20.08    0.51
   7   1  -5   19.67    0.61
  -7   1   5   20.10    0.61
   6  -1  -5    2.16    0.17
  -6  -1   5    2.37    0.18
   6  -1  -5    2.37    0.15
  -6  -1   5    1.98    0.14
  -6   1   5    2.34    0.13
   6   1  -5    1.96    0.17
   6   1  -5    2.39    0.12
  -6   1   5    2.27    0.18
  -6   1   5    2.42    0.17
   5  -1  -5   58.18    1.28
   5  -1  -5   59.24    1.32
  -5  -1   5   58.22    1.27
  -5  -1   5   58.24    1.32
  -5   1   5   57.85    1.25
   5   1  -5   58.60    1.21
  -5   1   5   59.31    1.33
   5   1  -5   60.66    1.33
  -5   1   5   58.71    1.31
  -4  -1   5    6.34    0.22
   4  -1  -5    6.42    0.22
  -4  -1   5    6.66    0.24
   4  -1  -5    6.29    0.24
  -4   1   5    6.13    0.22
   4   1  -5    6.70    0.17
   4   1  -5    6.61    0.25
  -4   1   5    6.46    0.21
  -4   1   5    6.73    0.24
  -4   1   5    6.36    0.23
  -3  -1   5   13.55    0.36
   3  -1  -5   13.52    0.35
  -3  -1   5   13.36    0.36
  -3   1   5   13.26    0.36
   3   1  -5   13.72    0.37
  -3   1   5   13.46    0.35
   3   1  -5   13.53    0.28
  -3   1   5   12.72    0.34
  -3   1   5   13.18    0.36
   3   1  -5   13.52    0.28
  -2  -1   5    1.99    0.10
  -2  -1   5    2.00    0.11
  -2   1   5    2.03    0.10
  -2   1   5    1.83    0.10
  -2   1   5    2.02    0.10
   2   1  -5    2.08    0.10
  -2   1   5    2.03    0.10
  -1  -1   5  184.35    3.64
   1  -1  -5  178.90    3.60
  -1  -1   5  180.22    3.61
  -1  -1   5  176.92    3.60
  -1   1   5  183.43    3.60
   1   1  -5  184.97    3.62
  -1   1   5  184.06    3.61
   1   1  -5  178.46    3.60
  -1   1   5  181.87    3.60
  -1   1   5  179.48    3.59
   0  -1  -5   63.30    1.24
   0  -1   5   62.77    1.28
   0  -1  -5   61.27    1.28
   0  -1   5   63.61    1.28
   0   1  -5   61.74    1.28
   0   1   5   62.17    1.24
   0   1   5   60.21    1.28
   0   1   5   60.76    1.29
   0   1  -5   62.01    1.27
  -1  -1  -5  253.54    5.10
   1  -1   5  263.57    5.07
   1  -1   5  256.55    5.15
  -1  -1  -5  249.94    5.12
  -1   1  -5  255.38    5.05
   1   1   5  252.07    5.05
   1   1   5  256.42    5.12
   1   1   5  257.50    5.07
  -1   1  -5  253.33    5.06
   2  -1   5  103.57    2.15
   2  -1   5  105.94    2.06
  -2  -1  -5  103.93    2.13
  -2  -1  -5  103.56    2.10
  -2   1  -5  104.38    2.12
   2   1   5  103.06    2.10
  -2   1  -5  106.74    2.06
   2   1   5  101.46    2.13
  -2   1  -5  103.63    2.13
   3  -1   5   76.82    1.62
  -3  -1  -5   74.70    1.55
  -3  -1  -5   74.70    1.61
  -3   1  -5   76.70    1.61
  -3   1  -5   76.90    1.60
   3   1   5   73.95    1.58
   3   1   5   75.85    1.60
   4  -1   5   49.31    1.13
  -4  -1  -5   49.79    1.05
  -4  -1  -5   49.57    1.13
   4   1   5   48.21    1.11
  -4   1  -5   51.47    1.13
   4   1   5   48.32    1.10
  -4   1  -5   50.19    1.13
   5  -1   5    6.17    0.27
  -5  -1  -5    6.04    0.27
  -5  -1  -5    6.24    0.20
  -5   1  -5    6.44    0.27
   5   1   5    6.24    0.25
   5   1   5    6.01    0.25
  -5   1  -5    6.20    0.27
  -6  -1  -5   65.92    1.52
   6  -1   5   66.54    1.51
  -6  -1  -5   66.11    1.37
   6  -1   5   65.47    1.51
   6   1   5   64.81    1.49
  -6   1  -5   65.53    1.51
   6   1   5   65.90    1.48
  -6   1  -5   64.67    1.51
   7  -1   5    0.06    0.09
   7  -1   5    0.03    0.09
  -7  -1  -5    0.00    0.09
  -7  -1  -5   -0.03    0.05
  -7   1  -5   -0.01    0.09
   7   1   5    0.01    0.10
  -7   1  -5   -0.03    0.09
   7   1   5   -0.07    0.08
   8  -1   5   30.84    0.86
  -8  -1  -5   29.65    0.87
   8  -1   5   28.19    0.85
  -8   1  -5   30.01    0.87
   8   1   5   29.76    0.82
  -8   1  -5   29.44    0.87
   8   1   5   30.81    0.86
   9  -1   5    0.67    0.16
   9  -1   5    0.71    0.17
  -9  -1  -5    0.64    0.17
   9   1   5    0.67    0.17
   9   1   5    0.56    0.14
  -9   1  -5    0.57    0.16
  -9   1  -5    0.91    0.19
  10  -1   5    0.95    0.20
  10  -1   5    1.25    0.22
 -10  -1  -5    0.86    0.20
  10   1   5    1.54    0.21
 -10   1  -5    1.30    0.23
  10   1   5    1.45    0.23
 -10   1  -5    1.09    0.21
  11  -1   5    1.37    0.24
  11  -1   5    1.22    0.24
 -11  -1  -5    1.43    0.25
  11   1   5    1.07    0.20
 -11   1  -5    1.18    0.23
  11   1   5    1.03    0.23
 -12  -1  -5    3.02    0.36
  12  -1   5    3.56    0.39
  12  -1   5    3.27    0.34
  12   1   5    2.57    0.33
 -12   1  -5    3.50    0.37
  13  -1   5    5.20    0.43
 -13  -1  -5    4.57    0.46
  13   1   5    4.73    0.46
 -13   1  -5    4.75    0.46
  13  -2  -5    1.79    0.30
 -13  -2   5    2.09    0.32
  13   2  -5    1.63    0.31
 -13   2   5    1.54    0.28
 -12  -2   5    0.41    0.19
  12  -2  -5    0.45    0.19
 -12   2   5    0.37    0.19
  12   2  -5    0.53    0.20
  11  -2  -5    0.22    0.15
  11  -2  -5   -0.01    0.14
 -11  -2   5    0.08    0.15
  11   2  -5    0.22    0.16
 -11   2   5    0.17    0.17
 -11   2   5    0.07    0.15
  10  -2  -5   30.22    0.87
 -10  -2   5   30.29    0.92
  10  -2  -5   30.51    0.94
 -10   2   5   30.47    0.95
  10   2  -5   28.56    0.92
 -10   2   5   30.73    0.91
  -9  -2   5    3.45    0.27
   9  -2  -5    3.62    0.24
   9  -2  -5    3.40    0.27
  -9  -2   5    3.44    0.22
   9   2  -5    3.12    0.26
  -9   2   5    3.62    0.29
  -9   2   5    3.67    0.28
   8  -2  -5    4.45    0.26
   8  -2  -5    4.25    0.28
  -8  -2   5    3.61    0.26
  -8  -2   5    4.42    0.23
  -8   2   5    4.85    0.29
   8   2  -5    4.52    0.20
  -8   2   5    4.03    0.27
   8   2  -5    4.22    0.28
  -7  -2   5    0.02    0.09
  -7  -2   5    0.04    0.07
   7  -2  -5   -0.05    0.07
   7  -2  -5    0.06    0.08
  -7   2   5    0.07    0.05
  -7   2   5    0.09    0.09
  -7   2   5    0.04    0.09
   7   2  -5    0.10    0.05
   7   2  -5   -0.02    0.09
   6  -2  -5   12.04    0.40
  -6  -2   5   11.34    0.38
  -6  -2   5   11.91    0.41
   6  -2  -5   12.18    0.42
  -6   2   5   11.51    0.40
  -6   2   5   12.26    0.35
   6   2  -5   11.71    0.42
   6   2  -5   12.28    0.31
  -6   2   5   12.89    0.43
  -5  -2   5   16.30    0.46
   5  -2  -5   15.91    0.46
  -5  -2   5   16.66    0.48
  -5   2   5   16.54    0.47
   5   2  -5   15.31    0.48
  -5   2   5   16.40    0.49
  -5   2   5   16.28    0.42
   5   2  -5   15.94    0.37
  -5   2   5   15.94    0.46
  -4  -2   5   73.80    1.56
   4  -2  -5   73.43    1.56
  -4  -2   5   71.94    1.55
  -4   2   5   71.83    1.54
  -4   2   5   71.83    1.52
   4   2  -5   73.78    1.58
  -4   2   5   71.01    1.56
  -4   2   5   71.19    1.55
   4   2  -5   71.47    1.45
   3  -2  -5   51.55    1.11
  -3  -2   5   51.95    1.12
  -3  -2   5   53.37    1.04
  -3  -2   5   51.18    1.14
  -3   2   5   51.71    1.11
  -3   2   5   51.38    1.13
  -3   2   5   49.85    1.13
   3   2  -5   51.98    1.04
   3   2  -5   51.52    1.14
  -3   2   5   51.71    1.11
  -2  -2   5   11.01    0.26
   2  -2  -5   10.71    0.31
  -2  -2   5   11.11    0.32
  -2  -2   5   10.65    0.29
  -2   2   5   10.65    0.30
  -2   2   5   11.01    0.28
  -2   2   5   10.82    0.31
   2   2  -5   11.21    0.32
  -2   2   5   11.54    0.31
   2   2  -5   11.14    0.26
  -1  -2   5   17.71    0.41
  -1  -2   5   17.39    0.44
   1  -2  -5   17.69    0.41
   1  -2  -5   18.79    0.45
  -1  -2   5   17.75    0.41
   1   2  -5   17.82    0.45
   1   2  -5   18.43    0.42
  -1   2   5   17.42    0.42
  -1   2   5   17.82    0.44
  -1   2   5   18.52    0.45
   1   2  -5   18.22    0.41
   0  -2   5   86.31    1.77
   0  -2  -5   86.62    1.78
   0  -2   5   87.00    1.77
   0  -2  -5   85.22    1.74
   0   2  -5   87.43    1.74
   0   2   5   85.46    1.74
   0   2  -5   84.54    1.78
   0   2   5   86.27    1.78
   1  -2   5   23.93    0.57
  -1  -2  -5   23.94    0.57
   1  -2   5   23.48    0.54
  -1  -2  -5   23.64    0.54
  -1   2  -5   23.81    0.57
  -1   2  -5   23.60    0.54
   1   2   5   23.36    0.57
   1   2   5   23.71    0.53
   2  -2   5    0.31    0.07
  -2  -2  -5    0.50    0.08
  -2  -2  -5    0.48    0.07
   2  -2   5    0.49    0.06
  -2   2  -5    0.43    0.07
   2   2   5    0.57    0.08
  -2   2  -5    0.71    0.08
   2   2   5    0.44    0.07
   3  -2   5    3.58    0.19
  -3  -2  -5    3.80    0.17
   3  -2   5    3.79    0.12
  -3  -2  -5    3.60    0.18
  -3   2  -5    3.87    0.18
   3   2   5    3.86    0.17
   3   2   5    4.02    0.18
  -3   2  -5    3.79    0.18
   4  -2   5   35.43    0.71
  -4  -2  -5   36.17    0.81
  -4  -2  -5   35.79    0.85
   4  -2   5   35.79    0.71
   4  -2   5   33.98    0.87
   4   2   5   34.59    0.83
   4   2   5   33.80    0.83
  -4   2  -5   35.35    0.84
  -4   2  -5   35.18    0.86
   5  -2   5    6.89    0.30
  -5  -2  -5    7.22    0.29
  -5  -2  -5    7.07    0.25
   5   2   5    7.16    0.28
  -5   2  -5    6.60    0.28
   5   2   5    7.05    0.28
  -5   2  -5    7.15    0.30
  -6  -2  -5    0.05    0.08
   6  -2   5    0.00    0.07
  -6  -2  -5    0.06    0.06
  -6   2  -5    0.10    0.09
   6   2   5    0.14    0.08
  -6   2  -5    0.08    0.08
   6   2   5    0.13    0.08
   7  -2   5    0.39    0.13
  -7  -2  -5    0.39    0.09
  -7  -2  -5    0.30    0.12
  -7   2  -5    0.24    0.11
  -7   2  -5    0.23    0.12
   7   2   5    0.33    0.11
   7   2   5    0.44    0.12
   8  -2   5    1.62    0.22
   8  -2   5    1.08    0.19
  -8  -2  -5    1.00    0.18
  -8   2  -5    1.21    0.19
  -8   2  -5    1.15    0.19
   8   2   5    1.32    0.19
   8   2   5    1.19    0.17
   9  -2   5    0.03    0.11
   9  -2   5    0.10    0.12
  -9  -2  -5    0.06    0.12
  -9   2  -5    0.08    0.12
   9   2   5    0.20    0.13
   9   2   5    0.16    0.11
  -9   2  -5    0.14    0.13
  10  -2   5    3.00    0.31
  10  -2   5    3.94    0.32
 -10  -2  -5    2.83    0.31
  10   2   5    3.14    0.25
  10   2   5    3.27    0.32
 -10   2  -5    3.15    0.33
 -10   2  -5    2.98    0.31
 -11  -2  -5    0.16    0.15
  11  -2   5    0.08    0.16
  11  -2   5    0.22    0.15
 -11   2  -5    0.48    0.19
  11   2   5    0.26    0.18
 -11   2  -5    0.29    0.18
 -12  -2  -5    0.16    0.17
  12  -2   5    0.20    0.20
  12  -2   5    0.37    0.19
 -12   2  -5   -0.01    0.16
  12   2   5    0.08    0.18
 -12   2  -5    0.22    0.21
  13  -2   5    0.02    0.18
 -13  -2  -5   -0.10    0.19
 -13   2  -5    0.33    0.20
  13   2   5    0.02    0.18
  13  -3  -5    2.61    0.36
 -13  -3   5    2.79    0.36
 -13   3   5    2.31    0.35
  13   3  -5    3.10    0.39
 -13   3   5    2.14    0.31
  12  -3  -5    4.08    0.41
 -12  -3   5    3.68    0.38
 -12   3   5    4.49    0.37
  12   3  -5    4.62    0.38
 -12   3   5    3.75    0.40
  11  -3  -5    0.67    0.20
 -11  -3   5    0.86    0.21
  11  -3  -5    0.98    0.21
  11   3  -5    0.82    0.21
 -11   3   5    0.86    0.20
 -11   3   5    0.75    0.21
  10  -3  -5   19.30    0.72
  10  -3  -5   19.86    0.68
 -10  -3   5   20.50    0.71
 -10   3   5   21.15    0.75
  10   3  -5   19.80    0.72
 -10   3   5   18.61    0.67
  -9  -3   5    0.38    0.13
   9  -3  -5    0.38    0.16
   9  -3  -5    0.18    0.12
  -9  -3   5    0.48    0.15
  -9   3   5    0.39    0.15
   9   3  -5    0.39    0.15
  -9   3   5    0.41    0.15
   8  -3  -5   25.91    0.76
  -8  -3   5   25.54    0.77
   8  -3  -5   25.05    0.78
   8  -3  -5   27.21    0.76
  -8  -3   5   26.00    0.73
   8   3  -5   25.28    0.78
  -8   3   5   24.84    0.74
  -8   3   5   25.60    0.79
  -7  -3   5    7.73    0.34
   7  -3  -5    8.09    0.28
  -7  -3   5    8.03    0.33
   7  -3  -5    8.23    0.36
   7   3  -5    7.67    0.36
  -7   3   5    7.56    0.36
  -7   3   5    8.37    0.28
   7   3  -5    7.73    0.24
  -7   3   5    6.89    0.32
   6  -3  -5   53.78    1.26
  -6  -3   5   52.20    1.23
   6  -3  -5   52.60    1.16
  -6  -3   5   52.18    1.23
  -6   3   5   52.71    1.16
  -6   3   5   51.93    1.21
   6   3  -5   52.92    1.10
  -6   3   5   51.52    1.26
   6   3  -5   51.84    1.26
   5  -3  -5   29.40    0.76
   5  -3  -5   28.81    0.70
  -5  -3   5   29.56    0.75
  -5  -3   5   28.52    0.73
  -5   3   5   29.17    0.69
  -5   3   5   28.89    0.76
  -5   3   5   28.98    0.76
   5   3  -5   29.01    0.77
   5   3  -5   28.18    0.63
  -5   3   5   29.50    0.72
  -4  -3   5   30.64    0.78
   4  -3  -5   31.48    0.75
  -4  -3   5   31.50    0.76
   4  -3  -5   32.16    0.80
  -4   3   5   31.25    0.79
  -4   3   5   31.80    0.74
   4   3  -5   31.91    0.80
  -4   3   5   31.77    0.79
  -4   3   5   31.94    0.75
   4   3  -5   32.20    0.68
  -3  -3   5    1.39    0.14
   3  -3  -5    1.45    0.11
  -3  -3   5    1.43    0.12
   3   3  -5    1.12    0.13
  -3   3   5    1.31    0.12
  -3   3   5    1.33    0.09
  -3   3   5    0.93    0.12
  -3   3   5    1.16    0.11
   3   3  -5    1.24    0.08
  -2  -3   5  135.29    2.77
   2  -3  -5  133.96    2.76
  -2  -3   5  134.99    2.71
   2  -3  -5  134.70    2.69
  -2   3   5  135.36    2.78
   2   3  -5  131.24    2.70
   2   3  -5  133.68    2.77
  -2   3   5  135.30    2.69
  -2   3   5  132.49    2.74
  -1  -3   5   96.60    1.95
   1  -3  -5   98.50    1.94
   1  -3  -5   94.66    2.02
  -1  -3   5   95.68    1.98
  -1  -3   5   96.09    2.02
   1   3  -5   97.13    1.95
   1   3  -5   95.54    2.02
   1   3  -5   97.23    1.98
  -1   3   5   94.95    2.02
  -1   3   5   98.89    1.99
   0  -3   5   21.49    0.53
   0  -3  -5   21.73    0.55
   0  -3  -5   21.27    0.47
   0  -3   5   21.32    0.53
   0   3  -5   21.56    0.48
   0   3  -5   20.08    0.54
   0   3   5   21.92    0.55
   0   3   5   21.34    0.51
   0   3  -5   21.43    0.53
  -1  -3  -5   92.96    1.88
   1  -3   5   92.48    1.95
  -1  -3  -5   94.71    1.96
   1  -3   5   90.78    1.91
   1   3   5   92.71    1.94
  -1   3  -5   92.57    1.95
  -1   3  -5   92.57    1.88
   1   3   5   90.76    1.91
   2  -3   5  150.31    3.12
  -2  -3  -5  152.02    3.11
   2  -3   5  149.98    3.05
  -2  -3  -5  152.58    3.06
  -2   3  -5  150.43    3.05
  -2   3  -5  152.30    3.12
   2   3   5  150.88    3.10
   2   3   5  152.01    3.07
   3  -3   5   15.37    0.38
  -3  -3  -5   15.15    0.42
  -3  -3  -5   14.70    0.43
   3  -3   5   14.87    0.46
   3   3   5   14.41    0.42
   3   3   5   15.10    0.43
  -3   3  -5   15.22    0.41
  -3   3  -5   16.15    0.46
   4  -3   5    2.42    0.18
   4  -3   5    2.29    0.10
  -4  -3  -5    2.20    0.16
  -4  -3  -5    2.23    0.15
   4   3   5    2.04    0.15
   4   3   5    2.02    0.15
  -4   3  -5    2.01    0.14
  -4   3  -5    2.01    0.16
   5  -3   5    0.49    0.12
  -5  -3  -5    0.47    0.11
   5  -3   5    0.44    0.05
  -5  -3  -5    0.34    0.09
  -5   3  -5    0.41    0.11
   5   3   5    0.68    0.12
   5   3   5    0.56    0.11
  -5   3  -5    0.41    0.10
  -6  -3  -5    0.13    0.09
   6  -3   5    0.50    0.14
  -6  -3  -5    0.33    0.10
   6   3   5    0.39    0.11
   6   3   5    0.35    0.10
  -6   3  -5    0.45    0.12
  -6   3  -5    0.30    0.11
  -7  -3  -5    5.05    0.29
   7  -3   5    4.97    0.30
  -7  -3  -5    4.75    0.24
  -7   3  -5    4.97    0.28
  -7   3  -5    4.94    0.30
   7   3   5    4.43    0.25
   7   3   5    4.84    0.29
  -8  -3  -5    0.76    0.13
   8  -3   5    0.72    0.17
  -8  -3  -5    0.66    0.16
   8   3   5    0.72    0.16
   8   3   5    0.71    0.14
  -8   3  -5    0.89    0.18
  -8   3  -5    0.95    0.19
  -9  -3  -5    1.59    0.23
   9  -3   5    1.24    0.21
   9  -3   5    1.12    0.21
  -9   3  -5    1.30    0.21
  -9   3  -5    1.55    0.23
   9   3   5    1.48    0.22
   9   3   5    2.02    0.22
 -10  -3  -5   11.97    0.54
  10  -3   5   11.13    0.54
  10  -3   5   12.16    0.55
  10   3   5   11.49    0.52
 -10   3  -5   11.38    0.51
 -10   3  -5   11.86    0.55
  11  -3   5    0.24    0.18
  11  -3   5    0.12    0.16
 -11  -3  -5    0.62    0.22
 -11   3  -5    0.62    0.20
 -11   3  -5    0.55    0.20
  11   3   5    0.53    0.19
  12  -3   5    3.87    0.42
 -12  -3  -5    3.61    0.39
  12  -3   5    4.25    0.42
  12   3   5    3.92    0.41
 -12   3  -5    4.57    0.46
 -12   3  -5    4.06    0.40
 -12  -4   5    1.81    0.30
  12  -4  -5    2.16    0.32
  12  -4  -5    2.00    0.30
  12   4  -5    1.56    0.29
 -12   4   5    2.13    0.29
 -12   4   5    1.29    0.26
 -11  -4   5    4.01    0.33
  11  -4  -5    4.30    0.36
  11  -4  -5    4.24    0.39
  11   4  -5    3.76    0.38
 -11   4   5    4.20    0.41
 -11   4   5    4.31    0.34
 -10  -4   5    4.95    0.35
 -10  -4   5    5.02    0.30
  10  -4  -5    3.90    0.31
  10  -4  -5    4.37    0.34
 -10   4   5    4.10    0.33
  10   4  -5    4.20    0.34
 -10   4   5    4.01    0.30
  -9  -4   5    0.78    0.19
   9  -4  -5    0.47    0.17
   9  -4  -5    0.71    0.18
  -9  -4   5    0.83    0.16
  -9   4   5    1.04    0.18
  -9   4   5    0.86    0.19
   9   4  -5    1.20    0.21
   8  -4  -5    3.78    0.28
  -8  -4   5    4.78    0.29
  -8  -4   5    3.97    0.27
  -8   4   5    4.05    0.26
  -8   4   5    4.14    0.29
   8   4  -5    4.37    0.30
   7  -4  -5   24.87    0.64
   7  -4  -5   25.45    0.76
  -7  -4   5   23.51    0.70
  -7  -4   5   25.10    0.72
   7   4  -5   24.35    0.75
  -7   4   5   24.19    0.68
  -7   4   5   24.97    0.75
   6  -4  -5    9.93    0.35
  -6  -4   5    9.85    0.39
  -6  -4   5   10.78    0.39
   6  -4  -5   10.09    0.42
   6   4  -5   10.05    0.29
  -6   4   5   10.01    0.41
  -6   4   5   10.22    0.36
  -6   4   5   10.41    0.41
   6   4  -5   10.42    0.41
  -5  -4   5   12.22    0.39
  -5  -4   5   11.94    0.42
   5  -4  -5   12.08    0.38
   5  -4  -5   12.21    0.44
   5   4  -5   11.83    0.32
  -5   4   5   12.59    0.45
  -5   4   5   12.21    0.37
   5   4  -5   12.17    0.44
  -5   4   5   11.59    0.42
  -4  -4   5    9.21    0.31
   4  -4  -5   10.20    0.37
  -4  -4   5    8.85    0.35
   4  -4  -5    9.38    0.32
  -4   4   5    8.84    0.34
   4   4  -5    9.79    0.36
  -4   4   5    9.28    0.29
  -4   4   5    9.14    0.36
   4   4  -5    8.82    0.27
  -3  -4   5    0.36    0.10
   3  -4  -5    0.34    0.09
  -3  -4   5    0.42    0.08
  -3   4   5    0.34    0.06
   3   4  -5    0.36    0.10
   3   4  -5    0.45    0.07
  -3   4   5    0.35    0.09
  -3   4   5    0.29    0.10
  -2  -4   5   33.48    0.75
   2  -4  -5   33.41    0.72
   2  -4  -5   33.79    0.83
  -2  -4   5   33.37    0.84
  -2   4   5   34.36    0.85
  -2   4   5   33.97    0.82
   2   4  -5   33.43    0.78
   2   4  -5   34.27    0.75
   2   4  -5   33.95    0.84
  -1  -4   5  131.87    2.75
  -1  -4   5  131.72    2.71
   1  -4  -5  133.06    2.75
   1  -4  -5  133.18    2.62
   1   4  -5  131.19    2.71
  -1   4   5  128.67    2.71
   1   4  -5  130.33    2.75
   1   4  -5  133.73    2.64
  -1   4   5  130.67    2.75
   0  -4  -5    4.69    0.22
   0  -4  -5    4.41    0.14
   0  -4   5    4.37    0.20
   0  -4   5    4.46    0.21
   0   4  -5    4.45    0.14
   0   4   5    4.55    0.19
   0   4  -5    4.11    0.21
   0   4   5    4.16    0.21
   0   4  -5    4.63    0.21
  -1  -4  -5   14.60    0.36
   1  -4   5   14.50    0.42
   1  -4   5   14.73    0.44
  -1  -4  -5   14.30    0.45
   1   4   5   14.63    0.44
  -1   4  -5   14.56    0.44
  -1   4  -5   14.83    0.35
  -1   4  -5   14.26    0.44
   1   4   5   14.64    0.41
  -2  -4  -5   12.77    0.35
  -2  -4  -5   12.86    0.42
   2  -4   5   13.14    0.43
   2  -4   5   12.52    0.37
   2   4   5   13.13    0.39
  -2   4  -5   12.93    0.42
  -2   4  -5   12.82    0.33
   2   4   5   13.22    0.40
  -3  -4  -5    6.43    0.24
   3  -4   5    6.63    0.24
  -3  -4  -5    6.45    0.28
   3  -4   5    6.12    0.29
  -3   4  -5    6.44    0.29
   3   4   5    7.04    0.28
   3   4   5    6.60    0.26
  -3   4  -5    6.53    0.23
  -4  -4  -5    9.43    0.33
   4  -4   5    9.13    0.28
   4  -4   5    9.63    0.38
  -4  -4  -5    9.07    0.35
  -4   4  -5    9.81    0.31
  -4   4  -5    9.76    0.37
   4   4   5    8.84    0.33
   4   4   5    9.38    0.34
  -5  -4  -5   15.57    0.49
  -5  -4  -5   14.62    0.47
   5  -4   5   15.56    0.54
   5  -4   5   15.05    0.39
   5   4   5   14.69    0.47
  -5   4  -5   15.68    0.46
   5   4   5   14.54    0.48
  -5   4  -5   15.68    0.53
   6  -4   5   17.19    0.61
  -6  -4  -5   18.10    0.57
  -6  -4  -5   17.42    0.54
   6   4   5   18.13    0.55
  -6   4  -5   17.59    0.54
  -6   4  -5   18.15    0.61
   6   4   5   18.02    0.57
   7  -4   5    0.17    0.15
  -7  -4  -5    0.26    0.12
  -7  -4  -5    0.14    0.11
   7   4   5    0.16    0.12
   7   4   5    0.20    0.10
  -7   4  -5    0.01    0.11
  -7   4  -5    0.22    0.13
  -8  -4  -5   11.74    0.43
   8  -4   5   10.65    0.50
  -8  -4  -5   11.04    0.47
  -8   4  -5   11.73    0.51
   8   4   5   11.97    0.48
   8   4   5   10.94    0.43
  -8   4  -5   11.19    0.46
  -9  -4  -5    1.41    0.22
   9  -4   5    1.26    0.23
  -9   4  -5    0.91    0.21
   9   4   5    1.17    0.21
   9   4   5    1.57    0.20
  -9   4  -5    1.75    0.24
 -10  -4  -5    0.86    0.21
  10  -4   5    0.52    0.19
  10  -4   5    0.75    0.21
  10   4   5    0.96    0.21
 -10   4  -5    0.56    0.19
 -10   4  -5    0.65    0.18
  11  -4   5    3.20    0.36
 -11  -4  -5    3.22    0.35
  11  -4   5    3.11    0.36
  11   4   5    3.75    0.38
 -11   4  -5    2.69    0.35
 -11   4  -5    3.44    0.35
  12  -4   5   -0.05    0.18
 -12  -4  -5   -0.01    0.16
  12  -4   5   -0.18    0.15
 -12   4  -5   -0.05    0.16
  12   4   5   -0.04    0.16
 -12   4  -5    0.00    0.17
  12  -5  -5    0.06    0.20
 -12  -5   5    0.22    0.18
  12  -5  -5    0.18    0.19
 -12   5   5    0.39    0.21
  12   5  -5    0.16    0.21
  11  -5  -5    1.30    0.27
  11  -5  -5    1.41    0.26
 -11  -5   5    1.49    0.26
 -11   5   5    1.49    0.28
  11   5  -5    1.34    0.26
 -11   5   5    1.39    0.23
 -10  -5   5    6.14    0.37
  10  -5  -5    6.88    0.43
 -10  -5   5    5.87    0.37
  10  -5  -5    5.38    0.39
 -10   5   5    6.48    0.36
 -10   5   5    5.51    0.39
  10   5  -5    5.84    0.39
  -9  -5   5    0.06    0.12
  -9  -5   5   -0.02    0.11
   9  -5  -5    0.07    0.14
  -9   5   5    0.01    0.12
   9   5  -5    0.00    0.13
  -9   5   5    0.01    0.12
  -8  -5   5    1.32    0.20
   8  -5  -5    1.29    0.21
  -8  -5   5    1.40    0.20
  -8   5   5    1.54    0.19
  -8   5   5    1.44    0.23
   8   5  -5    1.18    0.20
   7  -5  -5    0.02    0.12
  -7  -5   5    0.00    0.10
  -7  -5   5   -0.08    0.09
   7  -5  -5    0.07    0.09
   7   5  -5    0.11    0.12
  -7   5   5    0.02    0.13
  -7   5   5    0.10    0.10
  -6  -5   5    0.43    0.14
   6  -5  -5    0.72    0.17
   6  -5  -5    0.45    0.11
  -6  -5   5    0.39    0.13
  -6   5   5    0.41    0.12
  -6   5   5    0.67    0.15
   6   5  -5    0.63    0.15
  -6   5   5    0.57    0.16
  -5  -5   5    0.05    0.09
   5  -5  -5    0.11    0.11
   5  -5  -5    0.08    0.08
  -5  -5   5    0.09    0.10
   5   5  -5    0.13    0.06
  -5   5   5    0.10    0.07
   5   5  -5    0.18    0.11
  -5   5   5    0.18    0.12
  -5   5   5    0.09    0.10
   4  -5  -5    7.45    0.31
  -4  -5   5    7.86    0.34
  -4  -5   5    7.32    0.27
   4  -5  -5    7.37    0.35
   4   5  -5    7.07    0.33
  -4   5   5    7.69    0.35
  -4   5   5    7.00    0.24
   4   5  -5    7.35    0.26
  -4   5   5    7.16    0.32
   3  -5  -5    6.19    0.28
   3  -5  -5    5.95    0.19
  -3  -5   5    6.76    0.30
  -3  -5   5    5.68    0.22
   3   5  -5    6.22    0.29
  -3   5   5    5.59    0.27
  -3   5   5    5.97    0.19
  -3   5   5    5.79    0.29
   3   5  -5    5.94    0.24
  -2  -5   5   38.86    0.85
  -2  -5   5   37.88    0.97
   2  -5  -5   40.19    0.97
   2  -5  -5   38.27    0.81
  -2   5   5   39.03    0.95
   2   5  -5   39.15    0.92
  -2   5   5   39.43    0.99
   2   5  -5   38.25    0.98
   2   5  -5   40.01    0.86
   1  -5  -5   14.12    0.46
   1  -5  -5   14.11    0.30
  -1  -5   5   13.91    0.43
  -1  -5   5   13.48    0.45
   1  -5  -5   13.95    0.29
   1   5  -5   13.96    0.46
   1   5  -5   13.66    0.42
  -1   5   5   14.36    0.46
   1   5  -5   13.82    0.33
  -1   5   5   13.27    0.43
   0  -5   5    8.66    0.34
   0  -5   5    9.38    0.34
   0  -5  -5    9.54    0.36
   0  -5  -5    9.00    0.21
   0   5   5    8.32    0.31
   0   5  -5    8.98    0.35
   0   5  -5    8.87    0.33
   0   5  -5    8.88    0.22
   0   5   5    9.35    0.35
   1  -5   5   10.68    0.40
  -1  -5  -5   11.93    0.30
  -1  -5  -5   12.32    0.42
   1  -5   5   11.88    0.39
   1   5   5   11.66    0.38
   1   5   5   12.00    0.41
  -1   5  -5   10.97    0.40
  -1   5  -5   12.01    0.42
  -1   5  -5   12.16    0.28
  -2  -5  -5    9.55    0.37
  -2  -5  -5    9.50    0.28
   2  -5   5   10.09    0.35
   2  -5   5    9.43    0.38
   2   5   5    9.22    0.35
  -2   5  -5    9.95    0.38
   2   5   5   10.04    0.35
  -2   5  -5   10.05    0.26
   3  -5   5    2.49    0.16
  -3  -5  -5    2.32    0.19
  -3  -5  -5    2.31    0.14
   3  -5   5    2.10    0.22
   3   5   5    2.05    0.17
   3   5   5    2.71    0.19
  -3   5  -5    2.48    0.13
  -3   5  -5    2.29    0.19
   4  -5   5    0.10    0.07
  -4  -5  -5    0.16    0.10
  -4  -5  -5    0.05    0.07
   4  -5   5   -0.06    0.09
  -4   5  -5    0.12    0.10
  -4   5  -5    0.15    0.07
   4   5   5    0.12    0.09
   4   5   5    0.10    0.09
   5  -5   5   16.90    0.46
  -5  -5  -5   16.43    0.51
   5  -5   5   15.85    0.59
  -5  -5  -5   17.29    0.56
  -5   5  -5   16.64    0.58
   5   5   5   16.62    0.53
  -5   5  -5   16.72    0.49
   5   5   5   16.06    0.54
  -6  -5  -5   14.21    0.49
   6  -5   5   13.59    0.55
  -6  -5  -5   13.73    0.50
  -6   5  -5   14.07    0.46
   6   5   5   13.85    0.48
  -6   5  -5   13.92    0.54
   6   5   5   13.40    0.50
  -7  -5  -5    5.25    0.31
   7  -5   5    5.15    0.35
  -7  -5  -5    5.04    0.30
   7   5   5    4.83    0.30
  -7   5  -5    5.60    0.35
  -7   5  -5    5.90    0.30
   7   5   5    4.92    0.28
   8  -5   5    0.40    0.17
  -8  -5  -5    0.56    0.15
  -8  -5  -5    0.29    0.15
  -8   5  -5    0.28    0.13
  -8   5  -5    0.41    0.16
   8   5   5    0.50    0.16
   8   5   5    0.44    0.13
   9  -5   5    8.58    0.49
  -9  -5  -5   10.09    0.47
  -9   5  -5    8.75    0.48
   9   5   5    9.86    0.47
  -9   5  -5    9.59    0.43
 -10  -5  -5    4.59    0.37
  10  -5   5    5.36    0.41
 -10   5  -5    5.08    0.34
  10   5   5    5.40    0.39
 -10   5  -5    4.68    0.38
  11  -5   5    0.10    0.20
 -11  -5  -5    0.01    0.15
  11  -5   5    0.12    0.18
  11   5   5    0.17    0.17
 -11   5  -5    0.36    0.17
 -11   5  -5    0.08    0.17
  11  -6  -5    3.07    0.38
 -11  -6   5    2.29    0.30
  11  -6  -5    2.57    0.36
  11   6  -5    2.80    0.35
 -11   6   5    2.90    0.37
 -10  -6   5    2.51    0.29
 -10  -6   5    2.41    0.30
  10  -6  -5    2.66    0.35
  10   6  -5    2.76    0.34
 -10   6   5    2.45    0.33
  -9  -6   5    0.44    0.18
   9  -6  -5    0.45    0.19
  -9  -6   5    0.44    0.16
  -9   6   5    0.44    0.18
   9   6  -5    0.45    0.18
  -8  -6   5    0.20    0.13
   8  -6  -5   -0.04    0.14
  -8  -6   5   -0.20    0.10
   8   6  -5    0.07    0.14
  -8   6   5    0.00    0.13
   7  -6  -5    1.27    0.23
  -7  -6   5    1.11    0.18
   7  -6  -5    1.10    0.16
  -7  -6   5    0.97    0.19
  -7   6   5    0.91    0.19
   7   6  -5    0.84    0.19
  -6  -6   5    3.20    0.30
   6  -6  -5    2.93    0.22
   6  -6  -5    3.49    0.33
  -6  -6   5    2.93    0.22
  -6   6   5    3.46    0.33
   6   6  -5    3.47    0.31
  -6   6   5    2.86    0.28
  -5  -6   5    1.36    0.21
   5  -6  -5    2.23    0.26
  -5  -6   5    2.00    0.18
   5  -6  -5    1.76    0.20
   5   6  -5    1.96    0.16
  -5   6   5    1.66    0.21
  -5   6   5    1.94    0.24
   5   6  -5    2.32    0.25
  -4  -6   5    7.19    0.28
   4  -6  -5    7.54    0.38
   4  -6  -5    7.56    0.34
  -4  -6   5    7.31    0.36
   4   6  -5    7.81    0.30
  -4   6   5    7.25    0.37
  -4   6   5    7.94    0.36
   4   6  -5    8.16    0.37
  -3  -6   5    0.62    0.09
   3  -6  -5    0.63    0.13
  -3  -6   5    0.52    0.14
  -3   6   5    0.46    0.12
  -3   6   5    0.57    0.15
   3   6  -5    0.48    0.11
   3   6  -5    0.40    0.13
   3   6  -5    0.48    0.08
  -2  -6   5   19.56    0.56
  -2  -6   5   19.47    0.61
   2  -6  -5   18.64    0.59
  -2   6   5   18.93    0.58
  -2   6   5   17.99    0.60
   2   6  -5   18.90    0.55
   2   6  -5   18.30    0.60
  -1  -6   5    0.08    0.10
  -1  -6   5    0.19    0.10
   1  -6  -5    0.19    0.11
   1   6  -5    0.15    0.11
  -1   6   5    0.08    0.09
  -1   6   5    0.06    0.11
   1   6  -5    0.06    0.10
   0  -6   5   83.52    1.92
   0  -6   5   89.09    1.94
   0  -6  -5   85.52    1.95
   0   6   5   84.11    1.91
   0   6  -5   86.94    1.96
   0   6  -5   88.08    1.93
   0   6   5   87.49    1.95
   1  -6   5   42.47    1.08
   1  -6   5   44.18    1.06
  -1  -6  -5   41.04    0.89
  -1  -6  -5   43.17    1.10
  -1   6  -5   41.42    1.08
   1   6   5   40.49    1.06
   1   6   5   42.83    1.05
  -1   6  -5   44.28    1.10
  -2  -6  -5   15.31    0.54
  -2  -6  -5   15.81    0.41
   2  -6   5   15.49    0.55
   2  -6   5   16.65    0.52
   2   6   5   16.62    0.54
  -2   6  -5   16.60    0.56
   2   6   5   15.70    0.51
  -2   6  -5   16.91    0.56
   3  -6   5   11.95    0.47
  -3  -6  -5   11.42    0.45
  -3  -6  -5   11.56    0.34
   3  -6   5   11.76    0.41
   3   6   5   10.60    0.41
   3   6   5   10.78    0.42
  -4  -6  -5   20.96    0.58
   4  -6   5   21.48    0.60
  -4  -6  -5   21.54    0.68
   4  -6   5   21.60    0.71
   4   6   5   21.18    0.64
  -4   6  -5   21.36    0.69
   4   6   5   21.44    0.65
   5  -6   5   19.36    0.56
   5  -6   5   18.96    0.69
  -5  -6  -5   20.10    0.58
  -5  -6  -5   19.68    0.65
   5   6   5   19.53    0.63
   5   6   5   20.42    0.62
  -5   6  -5   19.58    0.67
   6  -6   5    0.34    0.16
  -6  -6  -5    0.18    0.13
  -6  -6  -5    0.32    0.12
  -6   6  -5    0.48    0.16
   6   6   5    0.20    0.13
   6   6   5    0.22    0.12
   7  -6   5   11.52    0.54
  -7  -6  -5   11.25    0.45
  -7  -6  -5   10.51    0.47
   7   6   5   11.19    0.48
   7   6   5   11.09    0.45
  -7   6  -5   12.37    0.54
   8  -6   5    1.69    0.27
  -8  -6  -5    1.44    0.22
  -8  -6  -5    1.93    0.25
   8   6   5    1.71    0.25
  -8   6  -5    1.44    0.26
   9  -6   5    3.01    0.36
  -9  -6  -5    3.25    0.32
  -9  -6  -5    3.17    0.31
  -9   6  -5    2.90    0.35
   9   6   5    4.07    0.38
  10  -6   5    0.33    0.20
 -10  -6  -5    0.43    0.17
 -10   6  -5    0.34    0.20
  10   6   5    0.34    0.18
  11  -6   5    1.65    0.32
 -11  -6  -5    1.01    0.23
 -11   6  -5    1.26    0.28
  11   6   5    0.90    0.25
 -10  -7   5    0.53    0.19
  10  -7  -5    0.45    0.22
 -10   7   5    0.49    0.23
  10   7  -5    0.70    0.22
   9  -7  -5    0.03    0.16
  -9  -7   5    0.03    0.17
   9   7  -5    0.03    0.16
  -9   7   5    0.10    0.17
   8  -7  -5    0.01    0.18
  -8  -7   5    0.10    0.15
  -8   7   5    0.37    0.17
   8   7  -5    0.01    0.14
  -7  -7   5    0.33    0.16
   7  -7  -5    0.00    0.15
   7   7  -5    0.48    0.17
  -7   7   5    0.09    0.14
  -6  -7   5    8.67    0.44
   6  -7  -5    8.67    0.46
   6  -7  -5    8.28    0.39
  -6   7   5    8.67    0.44
   6   7  -5    9.09    0.45
  -6   7   5    9.01    0.47
   5  -7  -5    1.51    0.24
  -5  -7   5    1.09    0.21
   5  -7  -5    0.96    0.17
  -5   7   5    1.09    0.21
   5   7  -5    1.04    0.20
  -5   7   5    0.90    0.18
   4  -7  -5   10.71    0.45
   4  -7  -5   11.78    0.51
  -4  -7   5   10.87    0.48
  -4   7   5   10.79    0.49
   4   7  -5   10.59    0.40
   4   7  -5   11.03    0.48
  -4   7   5   11.06    0.47
   3  -7  -5   -0.03    0.12
  -3  -7   5    0.01    0.10
   3  -7  -5    0.18    0.11
  -3  -7   5   -0.01    0.11
  -3   7   5   -0.05    0.11
  -3   7   5   -0.14    0.09
   3   7  -5    0.06    0.10
   3   7  -5    0.03    0.12
  -2  -7   5    2.03    0.21
  -2  -7   5    1.77    0.22
   2  -7  -5    2.52    0.26
   2   7  -5    1.65    0.21
  -2   7   5    1.90    0.22
  -2   7   5    2.26    0.25
   2   7  -5    1.91    0.20
   1  -7  -5    0.20    0.12
  -1  -7   5    0.23    0.12
  -1  -7   5    0.37    0.14
  -1   7   5    0.45    0.14
   1   7  -5    0.43    0.14
  -1   7   5    0.38    0.14
   1   7  -5    0.18    0.12
   0  -7  -5    9.31    0.42
   0  -7   5   10.22    0.42
   0  -7   5    9.81    0.41
   0   7   5    9.62    0.40
   0   7   5    9.53    0.42
   0   7  -5    9.02    0.40
   0   7  -5    9.34    0.42
   1  -7   5    0.33    0.14
   1  -7   5    0.29    0.13
  -1  -7  -5    0.15    0.13
  -1   7  -5    0.33    0.14
   1   7   5    0.24    0.12
  -1   7  -5    0.40    0.15
   1   7   5    0.43    0.14
   2  -7   5    0.35    0.13
  -2  -7  -5    0.27    0.14
   2  -7   5    0.36    0.14
  -2   7  -5    0.25    0.14
   2   7   5    0.35    0.13
   2   7   5    0.43    0.14
  -2   7  -5    0.36    0.14
  -3  -7  -5    1.98    0.24
   3  -7   5    2.49    0.24
   3  -7   5    2.21    0.26
   3   7   5    2.23    0.24
   3   7   5    2.39    0.24
  -3   7  -5    2.48    0.28
   4  -7   5    0.99    0.16
   4  -7   5    1.00    0.21
  -4  -7  -5    1.16    0.20
   4   7   5    1.07    0.18
   4   7   5    1.01    0.18
  -4   7  -5    0.85    0.19
   5  -7   5    1.96    0.23
   5  -7   5    2.18    0.29
  -5  -7  -5    2.17    0.26
   5   7   5    2.37    0.25
   5   7   5    1.84    0.22
  -5   7  -5    2.09    0.27
   6  -7   5   -0.15    0.13
  -6  -7  -5    0.25    0.14
   6   7   5    0.15    0.13
  -6   7  -5    0.21    0.15
   6   7   5    0.05    0.14
  -7  -7  -5    1.35    0.23
   7  -7   5    1.10    0.24
   7   7   5    0.81    0.20
  -7   7  -5    1.22    0.23
   8  -7   5    2.34    0.33
  -8  -7  -5    3.24    0.34
  -8   7  -5    3.24    0.37
   8   7   5    3.33    0.35
   9  -7   5    3.77    0.43
  -9  -7  -5    4.50    0.36
  -9   7  -5    4.82    0.40
   9   7   5    5.11    0.37
  10  -7   5    0.24    0.19
  10   7   5    0.39    0.20
 -10   7  -5    0.22    0.20
  -9  -8   5    5.55    0.43
   9  -8  -5    5.22    0.44
  -9   8   5    4.36    0.43
   9   8  -5    4.89    0.41
  -8  -8   5    5.02    0.39
   8  -8  -5    5.05    0.48
   8   8  -5    5.98    0.42
  -8   8   5    5.18    0.40
  -7  -8   5    6.29    0.42
   7  -8  -5    6.72    0.45
   7   8  -5    7.13    0.44
  -7   8   5    5.45    0.41
   6  -8  -5    0.69    0.21
   6  -8  -5    0.52    0.17
  -6  -8   5    0.78    0.21
  -6   8   5    1.15    0.24
   6   8  -5    0.81    0.22
  -6   8   5    0.64    0.21
   5  -8  -5   12.20    0.57
  -5  -8   5   11.64    0.54
   5  -8  -5   12.11    0.50
   5   8  -5   11.89    0.54
  -5   8   5   11.90    0.53
  -5   8   5   11.89    0.56
  -4  -8   5   -0.22    0.13
   4  -8  -5   -0.11    0.13
   4  -8  -5    0.10    0.13
   4   8  -5    0.00    0.13
  -4   8   5    0.05    0.14
   4   8  -5   -0.01    0.13
  -4   8   5    0.18    0.13
   3  -8  -5    2.17    0.27
  -3  -8   5    1.99    0.26
   3  -8  -5    1.93    0.25
  -3  -8   5    2.15    0.23
   3   8  -5    1.75    0.22
  -3   8   5    1.86    0.26
  -3   8   5    1.39    0.21
   3   8  -5    1.82    0.25
  -2  -8   5    0.31    0.15
   2  -8  -5    0.16    0.13
  -2  -8   5    0.21    0.12
  -2   8   5    0.38    0.16
   2   8  -5    0.37    0.14
   2   8  -5    0.16    0.13
  -2   8   5    0.38    0.14
  -1  -8   5    0.83    0.18
  -1  -8   5    0.96    0.19
   1  -8  -5    0.76    0.18
   1   8  -5    0.96    0.19
   1   8  -5    0.92    0.18
  -1   8   5    0.72    0.17
  -1   8   5    1.01    0.20
   0  -8   5   16.01    0.60
   0  -8   5   17.10    0.62
   0  -8  -5   15.94    0.62
   0   8   5   17.03    0.60
   0   8  -5   17.59    0.63
   0   8   5   16.48    0.62
   0   8  -5   16.56    0.60
  -1  -8  -5    4.49    0.34
   1  -8   5    5.43    0.32
   1  -8   5    4.04    0.31
   1   8   5    5.09    0.32
   1   8   5    4.22    0.30
  -1   8  -5    4.29    0.32
  -1   8  -5    5.03    0.33
   2  -8   5    2.94    0.30
   2  -8   5    3.31    0.27
  -2  -8  -5    3.46    0.33
  -2   8  -5    3.04    0.31
   2   8   5    3.57    0.28
  -2   8  -5    3.02    0.31
   2   8   5    3.25    0.27
   3  -8   5    1.47    0.21
  -3  -8  -5    1.90    0.27
   3  -8   5    1.69    0.25
   3   8   5    1.66    0.23
   3   8   5    1.82    0.24
  -3   8  -5    1.90    0.26
   4  -8   5    0.08    0.12
  -4  -8  -5   -0.11    0.11
   4  -8   5   -0.04    0.14
  -4   8  -5   -0.13    0.12
   4   8   5   -0.01    0.11
   4   8   5    0.10    0.14
   5  -8   5   -0.12    0.14
  -5  -8  -5   -0.08    0.13
  -5   8  -5   -0.08    0.13
   5   8   5   -0.02    0.12
   5   8   5    0.01    0.14
  -6  -8  -5    0.36    0.19
   6  -8   5    0.44    0.20
  -6   8  -5    0.41    0.18
   6   8   5    0.61    0.18
   6   8   5    0.43    0.17
  -7  -8  -5    2.25    0.30
   7  -8   5    2.50    0.35
   7   8   5    1.74    0.26
  -7   8  -5    1.77    0.29
  -8  -8  -5    0.02    0.17
   8  -8   5    0.12    0.21
  -8   8  -5    0.02    0.17
   8   8   5    0.07    0.16
   9  -8   5    5.42    0.47
  -9  -8  -5    6.17    0.42
  -9   8  -5    5.32    0.51
   9   8   5    6.08    0.44
   8  -9  -5    1.15    0.29
  -8  -9   5    1.49    0.29
   8   9  -5    0.92    0.26
  -8   9   5    1.21    0.27
  -7  -9   5    2.43    0.33
   7  -9  -5    2.07    0.34
   7   9  -5    2.45    0.34
  -7   9   5    2.23    0.32
  -6  -9   5    0.25    0.18
   6  -9  -5    0.12    0.18
   6   9  -5    0.42    0.20
  -6   9   5    0.38    0.19
  -6   9   5    0.30    0.20
   5  -9  -5    1.37    0.28
  -5  -9   5    1.74    0.29
   5  -9  -5    1.37    0.24
  -5   9   5    1.54    0.28
  -5   9   5    1.60    0.27
   5   9  -5    1.60    0.27
  -4  -9   5    0.06    0.16
   4  -9  -5   -0.10    0.15
   4  -9  -5    0.09    0.20
  -4   9   5    0.00    0.15
  -4   9   5   -0.01    0.18
   4   9  -5    0.10    0.17
   3  -9  -5    0.75    0.19
  -3  -9   5    0.78    0.22
   3  -9  -5    0.56    0.20
  -3   9   5    0.50    0.19
   3   9  -5    0.77    0.20
  -3   9   5    0.53    0.20
   3   9  -5    0.53    0.17
   2  -9  -5    4.53    0.36
   2  -9  -5    4.77    0.36
  -2  -9   5    4.85    0.32
  -2  -9   5    4.02    0.33
   2   9  -5    4.57    0.35
  -2   9   5    5.15    0.35
  -2   9   5    4.63    0.36
   2   9  -5    5.23    0.33
  -1  -9   5   -0.04    0.14
   1  -9  -5   -0.03    0.13
  -1  -9   5    0.08    0.14
   1   9  -5    0.14    0.15
  -1   9   5   -0.05    0.16
  -1   9   5    0.08    0.13
   1   9  -5    0.10    0.15
   0  -9   5    0.14    0.15
   0  -9   5    0.29    0.18
   0  -9  -5    0.13    0.16
   0   9  -5    0.10    0.17
   0   9  -5    0.08    0.16
   0   9   5    0.34    0.17
   0   9   5    0.20    0.15
   1  -9   5    3.81    0.35
  -1  -9  -5    3.33    0.35
   1  -9   5    3.64    0.35
   1   9   5    3.59    0.31
  -1   9  -5    3.45    0.35
  -1   9  -5    2.95    0.33
   1   9   5    3.63    0.34
   2  -9   5    0.97    0.20
  -2  -9  -5    0.82    0.21
   2  -9   5    0.90    0.21
  -2   9  -5    0.78    0.21
   2   9   5    0.36    0.16
   2   9   5    0.81    0.19
  -3  -9  -5    0.10    0.15
   3  -9   5   -0.04    0.17
   3  -9   5   -0.09    0.13
   3   9   5    0.02    0.13
   3   9   5   -0.03    0.12
  -3   9  -5    0.02    0.14
  -4  -9  -5    0.07    0.16
   4  -9   5    0.01    0.14
   4  -9   5   -0.21    0.14
  -4   9  -5    0.17    0.16
   4   9   5   -0.06    0.13
   4   9   5    0.05    0.13
  -5  -9  -5    0.01    0.15
   5  -9   5   -0.06    0.17
   5   9   5    0.08    0.15
   5   9   5    0.04    0.14
  -5   9  -5    0.10    0.16
  -6  -9  -5    0.17    0.17
   6  -9   5    0.04    0.19
  -6   9  -5   -0.10    0.15
   6   9   5    0.04    0.16
  -7  -9  -5    0.93    0.25
   7  -9   5    0.75    0.26
  -7   9  -5    0.88    0.26
   7   9   5    0.54    0.20
  -6 -10   5    1.70    0.31
   6 -10  -5    1.32    0.30
   6  10  -5    1.65    0.31
  -6  10   5    1.41    0.28
  -6  10   5    1.77    0.32
   5 -10  -5    0.33    0.21
  -5 -10   5    0.27    0.21
   5 -10  -5    0.33    0.19
  -5  10   5    0.45    0.22
   5  10  -5   -0.24    0.15
  -5  10   5    0.46    0.22
  -4 -10   5    1.00    0.24
   4 -10  -5    1.18    0.27
   4 -10  -5    0.92    0.22
   4  10  -5    1.05    0.25
  -4  10   5    1.56    0.27
  -4  10   5    1.65    0.30
   3 -10  -5    0.30    0.19
   3 -10  -5    0.41    0.19
  -3 -10   5    0.54    0.21
  -3  10   5    0.28    0.19
   3  10  -5    0.15    0.18
  -3  10   5    0.11    0.18
   2 -10  -5    1.11    0.24
  -2 -10   5    1.00    0.24
   2 -10  -5    0.99    0.24
  -2  10   5    1.34    0.26
   2  10  -5    1.05    0.22
   2  10  -5    1.27    0.26
  -2  10   5    1.17    0.25
  -1 -10   5    0.00    0.15
   1 -10  -5    0.20    0.17
   1 -10  -5   -0.11    0.15
  -1 -10   5    0.02    0.16
  -1  10   5   -0.22    0.14
   1  10  -5    0.17    0.19
  -1  10   5   -0.07    0.14
   1  10  -5    0.07    0.15
   0 -10   5    6.76    0.44
   0 -10  -5    6.44    0.45
   0 -10   5    6.82    0.44
   0  10  -5    6.58    0.43
   0  10   5    7.05    0.44
   0  10   5    6.11    0.40
   0  10  -5    7.51    0.46
   1 -10   5    0.45    0.20
   1 -10   5    0.67    0.21
  -1 -10  -5    0.53    0.22
  -1  10  -5    0.51    0.20
   1  10   5    0.44    0.19
   1  10   5    0.82    0.22
  -1  10  -5    0.35    0.19
   2 -10   5    5.30    0.41
  -2 -10  -5    4.94    0.40
   2 -10   5    5.05    0.38
   2  10   5    5.44    0.38
   2  10   5    5.86    0.39
  -2  10  -5    5.71    0.42
  -3 -10  -5    1.70    0.30
   3 -10   5    1.68    0.25
   3 -10   5    1.54    0.28
   3  10   5    2.26    0.31
  -3  10  -5    2.39    0.33
   3  10   5    2.21    0.30
   4 -10   5   -0.10    0.17
  -4 -10  -5    0.06    0.18
   4  10   5    0.03    0.17
  -4  10  -5    0.02    0.17
   4  10   5   -0.03    0.16
   5 -10   5    0.09    0.22
  -5 -10  -5    0.34    0.20
  -5  10  -5   -0.10    0.19
   5  10   5    0.03    0.18
   6 -10   5    1.42    0.31
  -6 -10  -5    1.55    0.31
  -6  10  -5    1.65    0.32
   3 -11  -5   -0.45    0.12
   3 -11  -5    0.01    0.19
  -3 -11   5   -0.14    0.18
  -3  11   5   -0.17    0.17
  -3  11   5   -0.10    0.18
   3  11  -5   -0.05    0.17
  -2 -11   5    1.22    0.27
   2 -11  -5    0.69    0.25
   2 -11  -5    0.59    0.24
   2  11  -5    1.04    0.25
  -2  11   5    0.72    0.22
  -2  11   5    0.60    0.23
   1 -11  -5    0.16    0.22
   1 -11  -5    0.16    0.18
  -1 -11   5    0.30    0.20
  -1  11   5    0.34    0.20
   1  11  -5    0.05    0.18
  -1  11   5    0.30    0.22
   1  11  -5    0.24    0.20
   0 -11   5   -0.26    0.15
   0 -11  -5   -0.21    0.18
   0 -11   5    0.10    0.17
   0 -11  -5    0.00    0.17
   0  11  -5   -0.07    0.17
   0  11   5   -0.04    0.18
   0  11  -5   -0.03    0.17
   0  11   5   -0.19    0.14
   1 -11   5    0.50    0.22
   1 -11   5    0.36    0.19
  -1 -11  -5    0.43    0.22
   1  11   5    0.58    0.21
  -1  11  -5    0.20    0.20
   1  11   5    0.52    0.22
  -2 -11  -5    0.25    0.21
   2 -11   5    0.78    0.21
   2 -11   5    0.65    0.23
   2  11   5    0.65    0.23
   2  11   5    0.71    0.24
  -2  11  -5    0.95    0.26
  13   0  -6    4.02    0.42
 -13   0   6    3.76    0.41
  12   0  -6   13.90    0.63
 -12   0   6   13.92    0.62
  11   0  -6    9.77    0.50
 -11   0   6    9.93    0.49
 -10   0   6   85.55    2.01
  10   0  -6   83.13    2.02
   9   0  -6   -0.02    0.07
  -9   0   6   -0.01    0.10
   9   0  -6   -0.02    0.10
   8   0  -6    1.34    0.19
  -8   0   6    1.33    0.14
   8   0  -6    1.69    0.16
  -8   0   6    1.36    0.19
  -7   0   6   11.25    0.42
   7   0  -6   12.07    0.36
  -7   0   6   12.23    0.36
   7   0  -6   12.04    0.44
  -6   0   6   14.01    0.39
   6   0  -6   13.68    0.38
  -6   0   6   13.59    0.45
   6   0  -6   14.80    0.46
  -5   0   6   69.90    1.51
  -5   0   6   70.48    1.56
   5   0  -6   71.34    1.48
   5   0  -6   73.74    1.57
   4   0  -6  408.32    8.36
   4   0  -6  424.40    8.47
  -4   0   6  436.99    8.38
  -4   0   6  416.45    8.33
   3   0  -6    6.67    0.22
  -3   0   6    6.29    0.21
  -3   0   6    6.52    0.22
  -3   0   6    6.56    0.17
   3   0  -6    6.63    0.18
   2   0  -6  187.99    3.75
  -2   0   6  186.97    3.76
  -2   0   6  189.84    3.77
  -2   0   6  189.14    3.72
   1   0  -6    3.10    0.12
  -1   0   6    2.92    0.12
   1   0  -6    3.14    0.10
  -1   0   6    2.96    0.12
  -1   0   6    3.14    0.10
   0   0   6   44.66    0.94
   0   0   6   45.66    0.94
   0   0  -6   43.65    0.95
   0   0  -6   45.06    0.90
   0   0   6   45.47    0.90
   1   0   6   30.67    0.70
  -1   0  -6   31.29    0.66
  -1   0  -6   30.68    0.70
   1   0   6   31.74    0.66
   2   0   6    0.01    0.03
  -2   0  -6    0.09    0.03
  -2   0  -6    0.02    0.05
   2   0   6    0.02    0.05
  -2   0  -6   -0.01    0.03
   3   0   6  156.88    3.12
  -3   0  -6  151.32    3.12
   3   0   6  152.23    3.14
  -3   0  -6  154.51    3.15
  -3   0  -6  154.88    3.05
  -4   0  -6   32.10    0.79
  -4   0  -6   31.96    0.77
   4   0   6   32.48    0.79
   4   0   6   31.72    0.76
  -4   0  -6   32.08    0.66
   5   0   6  155.07    3.20
   5   0   6  153.85    3.20
  -5   0  -6  149.93    3.21
  -5   0  -6  157.71    3.21
  -5   0  -6  154.02    3.04
   6   0   6   34.66    0.90
  -6   0  -6   37.06    0.92
  -6   0  -6   35.97    0.73
  -6   0  -6   35.61    0.93
   6   0   6   36.07    0.91
  -7   0  -6   61.82    1.52
  -7   0  -6   67.27    1.53
   7   0   6   64.99    1.52
   7   0   6   63.50    1.50
   8   0   6    6.79    0.34
  -8   0  -6    7.26    0.37
  -8   0  -6    6.48    0.35
   8   0   6    6.93    0.36
   9   0   6   11.62    0.47
  -9   0  -6   10.57    0.49
   9   0   6   11.80    0.50
  10   0   6    2.10    0.25
 -10   0  -6    2.11    0.27
  10   0   6    1.87    0.27
 -11   0  -6    8.46    0.47
  11   0   6    8.20    0.46
  11   0   6    8.47    0.44
  12   0   6   12.97    0.62
 -12   0  -6   14.93    0.67
  13   0   6   -0.02    0.18
 -13   0  -6   -0.27    0.18
  13  -1  -6    3.50    0.40
 -13  -1   6    4.61    0.44
 -13   1   6    3.47    0.38
  13   1  -6    4.04    0.43
 -12  -1   6    1.27    0.25
  12  -1  -6    1.95    0.30
 -12   1   6    1.80    0.29
  12   1  -6    1.96    0.31
 -11  -1   6    8.36    0.45
  11  -1  -6    7.48    0.44
  11   1  -6    8.44    0.46
 -11   1   6    8.91    0.46
 -10  -1   6   11.03    0.50
  10  -1  -6   11.78    0.52
  10  -1  -6   11.62    0.44
 -10   1   6   11.54    0.50
  10   1  -6   11.19    0.51
   9  -1  -6    1.39    0.17
  -9  -1   6    1.12    0.19
   9  -1  -6    1.24    0.20
  -9  -1   6    1.21    0.15
   9   1  -6    1.26    0.20
  -9   1   6    0.87    0.18
  -9   1   6    1.30    0.19
  -8  -1   6   15.63    0.46
   8  -1  -6   15.09    0.47
   8  -1  -6   14.29    0.53
  -8  -1   6   15.49    0.53
  -8   1   6   14.14    0.51
   8   1  -6   15.15    0.42
  -8   1   6   14.57    0.54
  -8   1   6   14.91    0.42
   8   1  -6   14.30    0.53
  -7  -1   6    9.12    0.31
   7  -1  -6    8.55    0.36
  -7  -1   6    8.54    0.36
   7  -1  -6    9.29    0.32
   7   1  -6    8.31    0.36
   7   1  -6    8.87    0.27
  -7   1   6    8.84    0.37
  -7   1   6    8.78    0.36
  -7   1   6    9.21    0.29
   6  -1  -6   12.98    0.43
  -6  -1   6   12.21    0.37
   6  -1  -6   12.98    0.38
  -6  -1   6   11.89    0.41
   6   1  -6   12.64    0.43
   6   1  -6   12.70    0.33
  -6   1   6   12.66    0.36
  -6   1   6   12.50    0.43
  -6   1   6   12.87    0.42
   5  -1  -6   14.77    0.41
  -5  -1   6   14.79    0.42
   5  -1  -6   15.61    0.46
  -5  -1   6   15.47    0.45
  -5   1   6   14.74    0.45
   5   1  -6   15.28    0.45
   5   1  -6   15.24    0.35
  -5   1   6   15.43    0.40
  -5   1   6   14.75    0.44
  -4  -1   6   29.74    0.72
   4  -1  -6   29.45    0.69
  -4  -1   6   31.10    0.71
   4  -1  -6   29.31    0.72
  -4   1   6   29.13    0.68
  -4   1   6   30.29    0.72
   4   1  -6   29.94    0.72
  -4   1   6   28.68    0.71
   4   1  -6   29.88    0.61
  -4   1   6   30.27    0.69
   4   1  -6   30.49    0.61
  -3  -1   6   10.18    0.30
  -3  -1   6    9.82    0.29
   3  -1  -6    8.99    0.28
   3   1  -6    9.48    0.29
  -3   1   6    9.82    0.29
  -3   1   6   10.33    0.28
  -3   1   6    9.64    0.29
  -3   1   6   10.10    0.28
  -2  -1   6   86.04    1.75
  -2  -1   6   84.14    1.75
  -2  -1   6   86.22    1.67
   2   1  -6   85.68    1.67
  -2   1   6   83.95    1.73
  -2   1   6   84.82    1.74
   2   1  -6   84.62    1.75
  -2   1   6   82.66    1.74
  -2   1   6   84.77    1.73
   1  -1  -6  188.12    3.79
  -1  -1   6  189.85    3.80
  -1  -1   6  189.82    3.79
  -1  -1   6  191.28    3.78
  -1   1   6  192.56    3.81
  -1   1   6  192.74    3.80
  -1   1   6  189.15    3.79
   1   1  -6  189.81    3.79
   1   1  -6  191.01    3.79
   0  -1   6  125.45    2.58
   0  -1  -6  130.20    2.55
   0  -1   6  128.97    2.59
   0  -1  -6  129.92    2.59
   0   1  -6  129.93    2.59
   0   1   6  129.53    2.60
   0   1   6  127.78    2.59
   0   1  -6  127.20    2.58
   0   1   6  129.99    2.54
   1  -1   6   13.49    0.35
  -1  -1  -6   13.31    0.34
  -1  -1  -6   13.14    0.35
   1  -1   6   13.67    0.32
   1   1   6   13.18    0.35
  -1   1  -6   13.29    0.33
   1   1   6   13.74    0.34
   1   1   6   13.99    0.30
  -1   1  -6   13.98    0.35
   2  -1   6  100.43    2.04
  -2  -1  -6   96.47    2.02
   2  -1   6   98.35    1.95
  -2  -1  -6   97.67    1.99
   2   1   6   95.99    2.02
  -2   1  -6   98.01    2.02
  -2   1  -6   98.31    2.01
   2   1   6   97.61    1.98
  -3  -1  -6   40.07    0.91
  -3  -1  -6   40.23    0.86
   3  -1   6   39.61    0.79
   3  -1   6   39.69    0.92
  -3   1  -6   40.77    0.91
  -3   1  -6   40.23    0.90
   3   1   6   37.51    0.90
   3   1   6   39.38    0.88
  -3   1  -6   39.33    0.79
  -4  -1  -6    0.96    0.08
  -4  -1  -6    0.87    0.12
   4  -1   6    0.86    0.12
   4   1   6    1.03    0.11
   4   1   6    0.79    0.11
  -4   1  -6    0.88    0.12
  -4   1  -6    0.96    0.12
  -5  -1  -6   78.85    1.64
   5  -1   6   79.68    1.77
  -5  -1  -6   78.16    1.76
  -5   1  -6   81.41    1.76
  -5   1  -6   80.00    1.76
   5   1   6   79.09    1.73
   5   1   6   81.04    1.75
   6  -1   6    0.11    0.09
   6  -1   6    0.24    0.11
  -6  -1  -6    0.31    0.06
  -6  -1  -6    0.30    0.11
  -6   1  -6    0.15    0.09
   6   1   6    0.35    0.10
   6   1   6    0.23    0.10
  -6   1  -6    0.44    0.11
  -7  -1  -6   25.13    0.75
   7  -1   6   26.33    0.75
   7  -1   6   25.93    0.75
  -7   1  -6   26.37    0.76
  -7   1  -6   27.06    0.76
   7   1   6   25.91    0.74
   7   1   6   25.54    0.72
   8  -1   6    2.43    0.25
  -8  -1  -6    2.65    0.26
   8  -1   6    1.98    0.24
  -8   1  -6    2.37    0.26
   8   1   6    2.01    0.21
  -8   1  -6    2.30    0.24
   8   1   6    2.26    0.24
   9  -1   6   17.68    0.62
   9  -1   6   17.06    0.62
  -9  -1  -6   16.09    0.62
   9   1   6   16.90    0.61
  -9   1  -6   16.97    0.63
   9   1   6   17.67    0.59
  -9   1  -6   16.96    0.63
  10  -1   6    9.53    0.49
  10  -1   6   10.27    0.48
 -10  -1  -6   10.73    0.51
  10   1   6   10.84    0.49
 -10   1  -6    9.33    0.48
 -10   1  -6    9.97    0.50
  10   1   6   10.81    0.46
  11  -1   6    1.51    0.25
  11  -1   6    1.93    0.29
 -11  -1  -6    1.06    0.23
 -11   1  -6    1.04    0.23
  11   1   6    1.40    0.22
  11   1   6    1.09    0.23
  12  -1   6    1.58    0.26
 -12  -1  -6    1.78    0.30
  12  -1   6    2.27    0.32
  12   1   6    2.06    0.30
 -12   1  -6    2.60    0.34
  13  -1   6    0.17    0.20
 -13  -1  -6    0.10    0.19
 -13   1  -6    0.49    0.22
  13   1   6    0.13    0.19
 -13  -2   6    2.80    0.36
  13  -2  -6    2.64    0.35
  13   2  -6    3.22    0.38
 -13   2   6    2.66    0.34
 -12  -2   6    0.18    0.18
  12  -2  -6    0.16    0.18
 -12   2   6    0.30    0.20
  12   2  -6    0.37    0.18
  11  -2  -6   18.52    0.70
 -11  -2   6   16.77    0.67
 -11   2   6   18.61    0.68
 -11   2   6   17.74    0.70
  11   2  -6   16.62    0.68
  10  -2  -6    1.49    0.20
  10  -2  -6    1.32    0.23
 -10  -2   6    1.25    0.22
  10   2  -6    1.09    0.21
 -10   2   6    1.44    0.24
 -10   2   6    1.33    0.22
  -9  -2   6   22.62    0.64
  -9  -2   6   21.88    0.72
   9  -2  -6   21.80    0.73
   9  -2  -6   21.60    0.66
   9   2  -6   21.62    0.72
  -9   2   6   21.09    0.72
  -9   2   6   22.74    0.71
  -8  -2   6    8.21    0.38
   8  -2  -6    8.53    0.39
   8  -2  -6    8.43    0.35
  -8  -2   6    8.70    0.34
  -8   2   6    8.10    0.39
  -8   2   6    8.25    0.29
  -8   2   6    8.50    0.37
   8   2  -6    8.54    0.39
  -7  -2   6   15.71    0.48
  -7  -2   6   15.17    0.51
   7  -2  -6   15.68    0.53
   7  -2  -6   15.96    0.50
  -7   2   6   16.16    0.44
   7   2  -6   15.89    0.39
   7   2  -6   15.86    0.53
  -7   2   6   16.56    0.52
  -7   2   6   15.84    0.53
  -6  -2   6    1.39    0.14
  -6  -2   6    0.79    0.13
   6  -2  -6    0.97    0.14
   6  -2  -6    1.34    0.15
  -6   2   6    1.11    0.14
   6   2  -6    1.13    0.07
  -6   2   6    1.16    0.11
  -6   2   6    1.25    0.16
   6   2  -6    1.28    0.16
   5  -2  -6   11.27    0.36
  -5  -2   6   11.38    0.36
  -5  -2   6   10.80    0.36
  -5   2   6   10.75    0.32
  -5   2   6   11.57    0.38
   5   2  -6   10.65    0.37
  -5   2   6   10.40    0.35
  -5   2   6   10.41    0.35
   5   2  -6   10.44    0.25
   4  -2  -6   48.18    1.08
  -4  -2   6   48.07    1.08
  -4  -2   6   46.65    1.07
  -4  -2   6   47.93    0.95
  -4   2   6   47.90    1.09
   4   2  -6   49.03    1.10
   4   2  -6   47.63    0.95
  -4   2   6   46.72    1.07
  -4   2   6   47.65    1.06
  -4   2   6   47.79    1.05
  -3  -2   6   44.06    0.97
  -3  -2   6   43.37    0.98
  -3  -2   6   43.82    0.87
  -3  -2   6   43.84    0.87
   3   2  -6   44.20    0.99
  -3   2   6   43.21    0.97
  -3   2   6   42.93    0.98
  -3   2   6   43.84    0.96
  -3   2   6   43.85    0.96
   3   2  -6   43.25    0.87
   2  -2  -6  153.22    3.14
   2  -2  -6  158.54    3.17
  -2  -2   6  151.89    3.17
  -2  -2   6  158.59    3.15
  -2  -2   6  159.31    3.10
  -2   2   6  160.17    3.17
  -2   2   6  159.80    3.17
  -2   2   6  156.56    3.15
   2   2  -6  152.96    3.17
  -2   2   6  154.10    3.14
   1  -2  -6   12.93    0.32
  -1  -2   6   13.33    0.36
   1  -2  -6   13.54    0.36
  -1  -2   6   12.86    0.33
  -1  -2   6   13.32    0.32
  -1   2   6   13.38    0.32
  -1   2   6   12.60    0.35
  -1   2   6   12.70    0.35
   1   2  -6   13.41    0.35
   1   2  -6   12.79    0.33
   0  -2  -6  511.20   10.08
   0  -2   6  492.83    9.84
   0  -2   6  490.71   10.01
   0  -2  -6  498.15   10.01
   0   2  -6  504.42    9.98
   0   2   6  514.45   10.18
   0   2   6  499.84    9.99
   0   2   6  481.40    9.85
   0   2  -6  504.60   10.07
   1  -2   6   98.98    1.99
  -1  -2  -6   97.49    2.02
   1  -2   6   97.65    2.03
  -1  -2  -6   96.81    2.00
  -1   2  -6   99.14    2.02
   1   2   6  100.64    2.03
   1   2   6   96.32    1.97
  -1   2  -6   95.35    1.99
  -2  -2  -6   26.62    0.63
   2  -2   6   26.37    0.58
  -2  -2  -6   26.12    0.62
   2  -2   6   26.40    0.65
  -2   2  -6   26.48    0.62
   2   2   6   26.13    0.64
   2   2   6   26.71    0.60
  -2   2  -6   26.48    0.64
  -3  -2  -6   30.87    0.73
  -3  -2  -6   28.91    0.70
   3  -2   6   31.13    0.76
   3  -2   6   30.18    0.64
   3   2   6   29.63    0.73
   3   2   6   29.92    0.70
  -3   2  -6   29.88    0.73
  -3   2  -6   30.14    0.72
  -4  -2  -6    1.29    0.14
   4  -2   6    1.11    0.05
   4  -2   6    1.50    0.16
   4  -2   6    1.05    0.04
  -4  -2  -6    1.33    0.12
  -4   2  -6    1.06    0.13
  -4   2  -6    1.08    0.05
   4   2   6    1.05    0.12
  -4   2  -6    1.04    0.12
   4   2   6    1.24    0.13
  -5  -2  -6   20.55    0.59
   5  -2   6   20.68    0.60
  -5  -2  -6   20.02    0.52
   5   2   6   19.64    0.56
  -5   2  -6   19.64    0.57
  -5   2  -6   21.15    0.60
   5   2   6   20.23    0.57
   6  -2   6    7.77    0.34
  -6  -2  -6    7.44    0.26
  -6  -2  -6    6.85    0.32
  -6   2  -6    7.31    0.32
   6   2   6    7.40    0.31
  -6   2  -6    7.33    0.33
   6   2   6    7.43    0.31
   7  -2   6    2.74    0.23
  -7  -2  -6    2.73    0.16
  -7  -2  -6    2.66    0.22
   7   2   6    2.32    0.22
  -7   2  -6    2.90    0.26
   7   2   6    2.33    0.19
  -7   2  -6    2.36    0.23
  -8  -2  -6    4.61    0.30
   8  -2   6    4.38    0.29
   8  -2   6    4.47    0.30
   8   2   6    4.43    0.28
  -8   2  -6    5.21    0.31
  -8   2  -6    4.77    0.30
   8   2   6    5.14    0.28
   9  -2   6    0.70    0.17
  -9  -2  -6    0.87    0.19
   9  -2   6    0.70    0.18
  -9   2  -6    0.74    0.18
  -9   2  -6    0.49    0.17
   9   2   6    0.59    0.15
   9   2   6    0.66    0.16
  10  -2   6    0.19    0.14
  10  -2   6    0.10    0.14
 -10  -2  -6    0.03    0.13
 -10   2  -6   -0.10    0.12
  10   2   6    0.22    0.14
 -10   2  -6    0.04    0.14
  10   2   6    0.22    0.13
 -11  -2  -6    0.21    0.16
  11  -2   6    0.06    0.15
  11  -2   6    0.10    0.15
 -11   2  -6    0.14    0.16
 -11   2  -6    0.01    0.14
  11   2   6    0.46    0.18
 -12  -2  -6    0.62    0.21
  12  -2   6    0.91    0.25
  12  -2   6    0.98    0.24
  12   2   6    0.78    0.23
 -12   2  -6    1.09    0.26
 -12   2  -6    0.60    0.21
 -13  -3   6    0.57    0.22
  13  -3  -6    0.68    0.24
  13   3  -6    0.47    0.21
 -13   3   6    0.60    0.22
  12  -3  -6    1.22    0.26
 -12  -3   6    1.72    0.28
 -12   3   6    1.60    0.28
  12   3  -6    1.53    0.27
 -12   3   6    1.71    0.26
  11  -3  -6    0.76    0.22
 -11  -3   6    1.08    0.22
  11  -3  -6    1.15    0.21
 -11   3   6    0.82    0.21
 -11   3   6    1.00    0.24
  11   3  -6    1.23    0.24
  10  -3  -6    0.67    0.19
  10  -3  -6    0.72    0.18
 -10  -3   6    0.77    0.19
 -10   3   6    0.74    0.17
 -10   3   6    0.88    0.20
  10   3  -6    0.57    0.18
   9  -3  -6    3.67    0.28
  -9  -3   6    3.76    0.25
  -9  -3   6    4.16    0.30
   9  -3  -6    3.71    0.29
   9   3  -6    4.29    0.30
  -9   3   6    3.57    0.30
  -9   3   6    4.01    0.28
  -8  -3   6    0.86    0.17
   8  -3  -6    0.39    0.12
   8  -3  -6    0.77    0.11
  -8  -3   6    0.81    0.14
   8  -3  -6    0.86    0.18
   8   3  -6    0.41    0.14
  -8   3   6    1.03    0.17
  -8   3   6    0.54    0.16
   7  -3  -6    2.22    0.22
   7  -3  -6    2.66    0.17
  -7  -3   6    2.41    0.23
  -7  -3   6    2.48    0.20
  -7   3   6    2.30    0.15
  -7   3   6    2.69    0.22
  -7   3   6    2.73    0.23
   7   3  -6    2.73    0.22
   6  -3  -6   20.39    0.53
  -6  -3   6   18.42    0.56
   6  -3  -6   19.04    0.58
  -6  -3   6   20.00    0.58
  -6   3   6   20.05    0.56
  -6   3   6   20.04    0.59
   6   3  -6   19.03    0.44
   6   3  -6   19.49    0.60
  -6   3   6   18.84    0.59
  -6   3   6   20.17    0.52
   5  -3  -6    0.33    0.10
  -5  -3   6    0.15    0.08
  -5  -3   6    0.15    0.08
   5  -3  -6    0.19    0.07
   5   3  -6    0.19    0.04
  -5   3   6    0.31    0.09
  -5   3   6    0.04    0.06
   5   3  -6    0.23    0.09
  -5   3   6    0.25    0.09
  -5   3   6    0.26    0.07
  -4  -3   6   16.23    0.45
  -4  -3   6   14.90    0.46
   4  -3  -6   15.94    0.44
   4  -3  -6   15.34    0.47
  -4   3   6   15.27    0.46
  -4   3   6   15.98    0.47
   4   3  -6   15.86    0.48
   4   3  -6   15.26    0.36
  -4   3   6   15.89    0.43
  -4   3   6   15.73    0.42
  -3  -3   6    6.65    0.23
   3  -3  -6    6.51    0.24
  -3  -3   6    6.27    0.25
   3   3  -6    6.04    0.25
  -3   3   6    6.06    0.26
  -3   3   6    6.57    0.24
  -3   3   6    6.36    0.24
   3   3  -6    6.07    0.18
  -3   3   6    6.30    0.21
   2  -3  -6  145.99    2.97
  -2  -3   6  149.15    2.98
  -2  -3   6  150.54    2.99
  -2  -3   6  146.75    3.05
   2  -3  -6  151.90    3.05
   2   3  -6  144.39    2.97
  -2   3   6  146.53    3.01
  -2   3   6  152.18    3.04
   2   3  -6  146.97    3.05
   2   3  -6  147.73    3.00
  -2   3   6  150.42    3.06
  -2   3   6  148.29    2.97
  -1  -3   6   28.04    0.66
   1  -3  -6   28.34    0.70
  -1  -3   6   29.34    0.70
   1  -3  -6   29.18    0.63
   1   3  -6   29.84    0.71
  -1   3   6   28.88    0.70
  -1   3   6   28.41    0.66
   1   3  -6   29.09    0.64
   1   3  -6   28.22    0.66
   0  -3  -6   13.26    0.39
   0  -3   6   13.28    0.37
   0  -3  -6   12.74    0.32
   0  -3   6   13.59    0.37
   0   3   6   13.09    0.38
   0   3  -6   13.34    0.39
   0   3   6   13.12    0.35
   0   3  -6   13.83    0.33
  -1  -3  -6    3.73    0.18
  -1  -3  -6    3.47    0.15
   1  -3   6    3.55    0.16
   1  -3   6    3.54    0.18
  -1   3  -6    3.75    0.18
   1   3   6    3.59    0.15
   1   3   6    3.46    0.18
  -1   3  -6    3.72    0.14
  -2  -3  -6   66.43    1.46
   2  -3   6   65.14    1.47
   2  -3   6   65.31    1.40
   2   3   6   67.23    1.42
  -2   3  -6   69.72    1.48
  -2   3  -6   65.94    1.41
   2   3   6   68.28    1.46
   3  -3   6   12.98    0.42
   3  -3   6   12.71    0.33
  -3  -3  -6   13.06    0.38
  -3  -3  -6   12.43    0.39
   3   3   6   13.02    0.40
   3   3   6   13.17    0.38
  -3   3  -6   12.65    0.41
  -3   3  -6   13.54    0.38
   4  -3   6    0.85    0.13
  -4  -3  -6    0.86    0.12
   4  -3   6    0.94    0.08
  -4  -3  -6    0.92    0.12
   4   3   6    0.86    0.12
  -4   3  -6    0.77    0.10
  -4   3  -6    0.84    0.13
   4   3   6    0.89    0.12
  -5  -3  -6    9.66    0.34
   5  -3   6   10.15    0.24
   5  -3   6   10.11    0.40
  -5  -3  -6    9.74    0.37
   5   3   6    9.55    0.35
   5   3   6   10.44    0.37
  -5   3  -6   10.67    0.36
  -5   3  -6   10.57    0.40
  -6  -3  -6    0.31    0.10
   6  -3   6    0.22    0.11
  -6  -3  -6    0.28    0.10
   6   3   6    0.40    0.11
  -6   3  -6    0.27    0.10
   6   3   6    0.46    0.12
  -6   3  -6    0.21    0.11
  -7  -3  -6    8.60    0.32
   7  -3   6    8.65    0.41
  -7  -3  -6    8.84    0.39
  -7   3  -6    8.70    0.40
  -7   3  -6    8.30    0.37
   7   3   6    8.67    0.37
   7   3   6    8.09    0.35
  -8  -3  -6   -0.07    0.12
   8  -3   6    0.08    0.12
   8   3   6    0.05    0.10
  -8   3  -6   -0.07    0.11
   8   3   6   -0.07    0.11
  -8   3  -6    0.06    0.12
  -9  -3  -6    8.77    0.45
   9  -3   6    9.02    0.45
   9  -3   6    8.63    0.44
   9   3   6    8.85    0.39
  -9   3  -6    8.24    0.41
  -9   3  -6    7.83    0.43
   9   3   6    8.54    0.42
 -10  -3  -6   11.42    0.53
  10  -3   6   13.02    0.57
  10  -3   6   11.37    0.54
  10   3   6   10.36    0.50
 -10   3  -6   10.91    0.52
  10   3   6   11.23    0.52
 -10   3  -6   11.46    0.54
 -11  -3  -6    0.03    0.15
  11  -3   6   -0.16    0.14
  11  -3   6    0.02    0.14
  11   3   6   -0.03    0.15
 -11   3  -6    0.12    0.16
 -11   3  -6    0.07    0.17
 -12  -3  -6    2.15    0.31
  12  -3   6    2.13    0.32
  12  -3   6    2.20    0.32
 -12   3  -6    2.11    0.32
 -12   3  -6    2.42    0.33
  12   3   6    2.09    0.31
  12  -4  -6    4.69    0.39
  12  -4  -6    4.45    0.45
 -12  -4   6    4.16    0.40
 -12   4   6    4.80    0.40
 -12   4   6    4.72    0.36
  12   4  -6    4.25    0.43
  11  -4  -6    8.41    0.49
 -11  -4   6    8.98    0.47
 -11   4   6    8.41    0.49
  11   4  -6    8.34    0.50
 -11   4   6   10.24    0.48
  10  -4  -6    0.23    0.16
  10  -4  -6    0.46    0.16
 -10  -4   6    0.40    0.15
 -10  -4   6   -0.01    0.15
  10   4  -6    0.47    0.18
 -10   4   6    0.56    0.17
 -10   4   6    0.27    0.16
   9  -4  -6    0.26    0.15
   9  -4  -6    0.30    0.15
  -9  -4   6    0.17    0.11
  -9  -4   6    0.11    0.12
   9   4  -6    0.26    0.15
  -9   4   6    0.23    0.15
  -9   4   6    0.12    0.12
  -8  -4   6    0.31    0.13
  -8  -4   6    0.11    0.11
   8  -4  -6    0.28    0.13
  -8   4   6    0.50    0.14
  -8   4   6    0.55    0.16
   8   4  -6    0.30    0.15
  -7  -4   6    1.24    0.17
  -7  -4   6    1.11    0.17
   7  -4  -6    1.33    0.20
   7  -4  -6    1.20    0.14
  -7   4   6    1.12    0.16
   7   4  -6    1.21    0.19
  -7   4   6    1.38    0.20
  -6  -4   6   25.54    0.73
   6  -4  -6   26.08    0.68
  -6  -4   6   25.79    0.71
   6  -4  -6   26.16    0.75
   6   4  -6   26.09    0.76
  -6   4   6   26.59    0.76
  -6   4   6   25.51    0.74
   6   4  -6   25.07    0.58
  -6   4   6   25.22    0.68
   5  -4  -6   12.32    0.40
  -5  -4   6   12.81    0.45
   5  -4  -6   12.65    0.45
  -5  -4   6   13.13    0.41
  -5   4   6   12.24    0.38
  -5   4   6   12.20    0.44
  -5   4   6   11.95    0.43
   5   4  -6   12.77    0.45
   5   4  -6   12.33    0.32
  -4  -4   6    0.24    0.08
   4  -4  -6    0.18    0.08
   4  -4  -6    0.18    0.09
  -4  -4   6    0.24    0.09
  -4   4   6    0.10    0.06
   4   4  -6    0.07    0.05
  -4   4   6    0.13    0.09
   4   4  -6    0.13    0.08
  -4   4   6    0.35    0.09
  -3  -4   6    3.45    0.16
   3  -4  -6    3.33    0.19
  -3  -4   6    3.32    0.20
   3  -4  -6    3.46    0.15
  -3   4   6    3.74    0.19
  -3   4   6    3.50    0.14
   3   4  -6    3.70    0.21
  -3   4   6    3.28    0.20
   3   4  -6    3.51    0.15
  -2  -4   6    2.75    0.18
   2  -4  -6    2.94    0.17
  -2  -4   6    2.65    0.15
   2  -4  -6    2.46    0.11
  -2  -4   6    2.40    0.12
  -2   4   6    2.67    0.18
   2   4  -6    2.61    0.14
   2   4  -6    2.82    0.13
   2   4  -6    2.87    0.18
  -2   4   6    2.47    0.15
  -1  -4   6    6.06    0.25
   1  -4  -6    5.83    0.25
  -1  -4   6    5.84    0.23
   1  -4  -6    6.03    0.17
   1   4  -6    5.76    0.25
  -1   4   6    6.08    0.26
  -1   4   6    6.16    0.23
   1   4  -6    6.31    0.19
   1   4  -6    6.32    0.24
   0  -4  -6    0.77    0.12
   0  -4  -6    0.79    0.07
   0  -4   6    0.68    0.10
   0  -4   6    0.68    0.11
   0   4  -6    0.70    0.07
   0   4  -6    0.69    0.11
   0   4  -6    0.77    0.11
   0   4   6    0.84    0.10
   0   4   6    0.53    0.10
   1  -4   6    0.60    0.09
  -1  -4  -6    0.61    0.07
   1  -4   6    0.69    0.11
  -1  -4  -6    0.71    0.12
  -1   4  -6    0.70    0.11
  -1   4  -6    0.67    0.07
   1   4   6    0.69    0.11
   1   4   6    0.78    0.10
  -2  -4  -6   33.32    0.84
   2  -4   6   34.03    0.86
   2  -4   6   33.57    0.79
  -2  -4  -6   32.70    0.77
   2   4   6   34.60    0.83
  -2   4  -6   34.08    0.76
  -2   4  -6   32.74    0.84
   2   4   6   34.06    0.80
  -3  -4  -6   17.88    0.48
   3  -4   6   17.18    0.54
   3  -4   6   17.10    0.46
  -3  -4  -6   17.21    0.52
  -3   4  -6   17.16    0.46
   3   4   6   17.24    0.49
  -3   4  -6   16.85    0.53
   3   4   6   17.80    0.51
  -4  -4  -6    0.66    0.13
   4  -4   6    0.64    0.09
  -4  -4  -6    0.60    0.11
   4  -4   6    0.70    0.14
   4   4   6    0.51    0.11
  -4   4  -6    0.47    0.09
   4   4   6    0.44    0.10
  -4   4  -6    0.54    0.12
   5  -4   6    8.03    0.24
   5  -4   6    7.91    0.37
  -5  -4  -6    7.40    0.31
  -5  -4  -6    7.52    0.32
  -5   4  -6    8.08    0.36
  -5   4  -6    7.75    0.31
   5   4   6    7.55    0.32
   5   4   6    8.11    0.33
  -6  -4  -6   25.17    0.70
   6  -4   6   23.90    0.76
  -6  -4  -6   25.28    0.72
   6   4   6   24.01    0.70
  -6   4  -6   24.34    0.75
   6   4   6   24.54    0.70
  -6   4  -6   25.23    0.69
  -7  -4  -6   22.67    0.70
  -7  -4  -6   21.55    0.64
   7   4   6   21.72    0.68
  -7   4  -6   21.59    0.66
   7   4   6   23.73    0.67
  -7   4  -6   21.22    0.72
  -8  -4  -6    0.95    0.16
  -8  -4  -6    0.40    0.16
   8  -4   6    0.50    0.17
   8   4   6    1.12    0.19
  -8   4  -6    0.54    0.16
   8   4   6    0.88    0.16
  -8   4  -6    0.79    0.18
  -9  -4  -6    1.32    0.22
   9  -4   6    1.54    0.25
  -9   4  -6    1.46    0.21
   9   4   6    1.92    0.22
   9   4   6    1.71    0.24
  -9   4  -6    1.82    0.26
  10  -4   6    0.55    0.20
  10  -4   6    0.76    0.20
 -10  -4  -6    0.64    0.19
  10   4   6    0.91    0.21
 -10   4  -6    0.75    0.19
 -10   4  -6    0.96    0.22
  11  -4   6    2.34    0.33
 -11  -4  -6    1.97    0.30
  11  -4   6    2.19    0.32
 -11   4  -6    1.73    0.29
 -11   4  -6    2.34    0.30
  11   4   6    2.14    0.31
  12  -4   6    2.39    0.35
  12  -4   6    1.89    0.33
 -12  -4  -6    1.95    0.31
 -12   4  -6    2.34    0.32
  12   4   6    2.00    0.31
 -12   4  -6    2.61    0.37
  12  -5  -6    0.03    0.18
  12  -5  -6   -0.08    0.18
 -12  -5   6   -0.12    0.15
 -12   5   6    0.17    0.19
  12   5  -6   -0.19    0.17
  11  -5  -6    0.93    0.24
 -11  -5   6    0.64    0.22
  11  -5  -6    0.60    0.22
 -11   5   6    0.75    0.19
 -11   5   6    0.41    0.19
  11   5  -6    0.59    0.20
  10  -5  -6    0.34    0.17
  10  -5  -6    0.30    0.16
 -10  -5   6    0.15    0.16
 -10  -5   6    0.19    0.13
 -10   5   6    0.22    0.15
 -10   5   6    0.40    0.18
  10   5  -6    0.07    0.15
  -9  -5   6    5.09    0.33
  -9  -5   6    6.06    0.35
   9  -5  -6    5.37    0.36
  -9   5   6    5.50    0.37
   9   5  -6    5.48    0.37
  -9   5   6    5.86    0.33
  -8  -5   6    0.46    0.14
  -8  -5   6    0.35    0.14
   8  -5  -6    0.21    0.16
  -8   5   6    0.32    0.15
  -8   5   6    0.21    0.12
   8   5  -6    0.14    0.13
   7  -5  -6    0.78    0.14
   7  -5  -6    0.90    0.19
  -7  -5   6    0.59    0.14
  -7  -5   6    0.61    0.15
   7   5  -6    0.72    0.18
  -7   5   6    0.50    0.13
  -7   5   6    0.64    0.16
  -7   5   6    0.50    0.16
   6  -5  -6    5.77    0.28
  -6  -5   6    5.71    0.32
  -6  -5   6    5.46    0.28
   6  -5  -6    6.51    0.35
  -6   5   6    5.43    0.26
  -6   5   6    6.14    0.33
  -6   5   6    6.12    0.34
   6   5  -6    6.69    0.34
  -5  -5   6   12.63    0.46
   5  -5  -6   12.15    0.47
   5  -5  -6   12.18    0.42
  -5  -5   6   12.68    0.41
  -5   5   6   11.41    0.47
  -5   5   6   12.15    0.45
   5   5  -6   13.17    0.48
  -5   5   6   12.01    0.37
   5   5  -6   11.89    0.35
  -4  -5   6   -0.04    0.08
   4  -5  -6    0.00    0.06
   4  -5  -6    0.14    0.11
  -4  -5   6    0.02    0.07
   4  -5  -6    0.07    0.09
   4   5  -6    0.00    0.06
  -4   5   6    0.10    0.11
   4   5  -6    0.07    0.10
  -4   5   6    0.16    0.09
  -4   5   6   -0.01    0.06
   3  -5  -6   -0.03    0.08
   3  -5  -6   -0.01    0.04
  -3  -5   6   -0.02    0.08
  -3  -5   6   -0.02    0.06
   3   5  -6   -0.07    0.06
  -3   5   6    0.05    0.07
  -3   5   6   -0.07    0.08
   3   5  -6    0.06    0.09
   3   5  -6    0.01    0.06
   2  -5  -6    6.91    0.19
  -2  -5   6    6.54    0.26
  -2  -5   6    6.63    0.30
   2  -5  -6    6.72    0.30
  -2  -5   6    6.51    0.22
   2   5  -6    6.88    0.26
   2   5  -6    6.90    0.22
  -2   5   6    6.88    0.31
   2   5  -6    6.72    0.30
  -2   5   6    6.49    0.28
   1  -5  -6    0.03    0.07
  -1  -5   6    0.04    0.07
  -1  -5   6    0.00    0.07
   1  -5  -6    0.03    0.03
  -1   5   6    0.02    0.07
   1   5  -6    0.04    0.08
   1   5  -6    0.00    0.07
  -1   5   6    0.04    0.06
   1   5  -6    0.02    0.04
   0  -5   6   24.12    0.65
   0  -5  -6   22.62    0.66
   0  -5   6   22.72    0.63
   0  -5  -6   22.91    0.51
   0   5  -6   23.41    0.52
   0   5  -6   22.63    0.63
   0   5   6   23.42    0.65
   0   5  -6   23.21    0.66
   0   5   6   23.09    0.62
   1  -5   6    0.00    0.09
  -1  -5  -6    0.04    0.04
  -1  -5  -6   -0.01    0.08
   1  -5   6    0.00    0.06
   1   5   6    0.01    0.06
  -1   5  -6    0.09    0.08
  -1   5  -6    0.01    0.09
   1   5   6    0.06    0.08
  -1   5  -6    0.02    0.04
  -2  -5  -6   16.90    0.54
   2  -5   6   17.62    0.56
   2  -5   6   17.77    0.51
  -2  -5  -6   17.15    0.44
  -2   5  -6   17.36    0.55
  -2   5  -6   17.36    0.42
   2   5   6   17.72    0.53
   2   5   6   16.26    0.50
  -3  -5  -6    7.21    0.26
   3  -5   6    6.94    0.34
  -3  -5  -6    7.16    0.32
   3  -5   6    7.21    0.28
   3   5   6    7.79    0.32
  -3   5  -6    7.29    0.24
   3   5   6    7.42    0.30
  -3   5  -6    7.47    0.34
  -4  -5  -6    2.51    0.20
   4  -5   6    2.57    0.16
   4  -5   6    2.04    0.22
  -4  -5  -6    2.62    0.17
   4   5   6    2.29    0.18
  -4   5  -6    2.51    0.16
   4   5   6    2.47    0.19
  -4   5  -6    2.23    0.23
  -5  -5  -6    0.38    0.12
   5  -5   6    0.39    0.09
  -5  -5  -6    0.31    0.12
   5  -5   6    0.36    0.15
   5   5   6    0.58    0.14
   5   5   6    0.43    0.13
  -5   5  -6    0.55    0.11
  -5   5  -6    0.41    0.13
  -6  -5  -6   15.69    0.53
   6  -5   6   15.99    0.61
  -6  -5  -6   16.11    0.56
  -6   5  -6   16.18    0.51
   6   5   6   16.11    0.55
   6   5   6   16.07    0.53
  -6   5  -6   16.03    0.59
   7  -5   6   19.28    0.72
  -7  -5  -6   20.91    0.67
  -7  -5  -6   22.00    0.67
   7   5   6   20.49    0.67
  -7   5  -6   20.39    0.72
  -7   5  -6   20.99    0.64
   7   5   6   22.11    0.66
   8  -5   6    0.25    0.16
  -8  -5  -6    0.41    0.15
  -8  -5  -6    0.53    0.15
   8   5   6    0.49    0.15
  -8   5  -6    0.54    0.17
  -8   5  -6    0.74    0.16
   8   5   6    0.35    0.14
  -9  -5  -6    3.43    0.33
   9  -5   6    2.13    0.29
   9   5   6    3.01    0.31
  -9   5  -6    2.95    0.34
  -9   5  -6    3.56    0.29
 -10  -5  -6    0.11    0.16
  10  -5   6    0.25    0.19
 -10   5  -6    0.05    0.16
 -10   5  -6    0.16    0.15
  10   5   6    0.34    0.19
 -11  -5  -6    0.51    0.21
  11  -5   6    0.18    0.18
  11  -5   6    0.06    0.17
 -11   5  -6    0.34    0.20
  11   5   6    0.35    0.19
 -11   5  -6    0.57    0.19
 -11  -6   6   -0.05    0.16
  11  -6  -6   -0.05    0.19
  11  -6  -6    0.06    0.17
 -11   6   6   -0.04    0.19
  11   6  -6    0.06    0.16
 -10  -6   6    0.52    0.17
 -10  -6   6    0.42    0.18
  10  -6  -6    0.52    0.20
 -10   6   6    0.38    0.19
  10   6  -6    0.33    0.19
   9  -6  -6   -0.07    0.15
  -9  -6   6    0.19    0.16
  -9  -6   6   -0.02    0.12
  -9   6   6    0.09    0.15
   9   6  -6   -0.12    0.14
   8  -6  -6    3.43    0.34
  -8  -6   6    4.37    0.31
  -8  -6   6    3.52    0.28
   8   6  -6    3.19    0.33
  -8   6   6    4.10    0.32
   7  -6  -6    4.50    0.33
  -7  -6   6    4.51    0.32
   7  -6  -6    4.08    0.26
  -7  -6   6    4.16    0.27
  -7   6   6    4.89    0.33
  -7   6   6    5.04    0.35
   7   6  -6    4.28    0.32
   6  -6  -6    4.31    0.32
  -6  -6   6    4.22    0.30
   6  -6  -6    3.92    0.26
  -6  -6   6    4.17    0.25
  -6   6   6    4.13    0.29
   6   6  -6    4.53    0.31
  -6   6   6    4.20    0.32
   5  -6  -6   10.09    0.45
  -5  -6   6    9.69    0.36
  -5  -6   6    9.54    0.43
   5  -6  -6    9.13    0.39
   5   6  -6    9.56    0.44
   5   6  -6    9.81    0.33
  -5   6   6    9.76    0.43
  -5   6   6    9.63    0.45
   4  -6  -6    4.05    0.26
   4  -6  -6    3.91    0.28
  -4  -6   6    3.96    0.20
  -4  -6   6    4.83    0.30
   4   6  -6    4.14    0.22
  -4   6   6    4.54    0.27
  -4   6   6    3.77    0.27
   4   6  -6    3.76    0.27
  -3  -6   6    0.09    0.09
  -3  -6   6    0.18    0.11
  -3  -6   6    0.06    0.06
   3  -6  -6    0.07    0.09
   3   6  -6    0.07    0.08
   3   6  -6    0.15    0.07
  -3   6   6    0.01    0.10
  -3   6   6    0.16    0.10
   3   6  -6    0.16    0.10
  -2  -6   6    0.98    0.16
   2  -6  -6    0.67    0.14
  -2  -6   6    0.72    0.13
   2   6  -6    0.78    0.15
   2   6  -6    0.63    0.12
   2   6  -6    0.97    0.11
  -2   6   6    0.75    0.16
  -2   6   6    0.84    0.14
   1  -6  -6    2.32    0.24
  -1  -6   6    2.20    0.22
  -1  -6   6    2.08    0.20
  -1   6   6    2.50    0.24
   1   6  -6    2.32    0.23
  -1   6   6    1.83    0.19
   1   6  -6    2.08    0.20
   0  -6  -6    7.58    0.35
   0  -6   6    7.01    0.32
   0  -6   6    7.27    0.32
   0   6   6    6.42    0.32
   0   6  -6    7.17    0.34
   0   6   6    6.49    0.30
   0   6  -6    6.99    0.32
  -1  -6  -6    0.31    0.06
   1  -6   6    0.23    0.10
   1  -6   6    0.23    0.12
  -1  -6  -6    0.50    0.13
   1   6   6    0.28    0.11
   1   6   6    0.37    0.12
  -1   6  -6    0.39    0.13
  -1   6  -6    0.24    0.12
   2  -6   6   13.11    0.45
   2  -6   6   13.25    0.50
  -2  -6  -6   12.99    0.48
  -2  -6  -6   12.84    0.35
   2   6   6   12.17    0.43
  -2   6  -6   13.56    0.50
   2   6   6   13.51    0.47
  -3  -6  -6    1.20    0.13
  -3  -6  -6    1.05    0.18
   3  -6   6    1.36    0.16
   3  -6   6    1.36    0.20
  -3   6  -6    1.02    0.18
   3   6   6    1.08    0.16
   3   6   6    1.45    0.18
  -4  -6  -6    1.87    0.17
  -4  -6  -6    2.11    0.24
   4  -6   6    2.15    0.19
   4  -6   6    2.41    0.27
   4   6   6    2.24    0.22
  -4   6  -6    1.66    0.22
   4   6   6    2.31    0.23
   5  -6   6   10.70    0.50
   5  -6   6   12.03    0.39
  -5  -6  -6   11.30    0.47
  -5  -6  -6   11.97    0.41
   5   6   6   12.07    0.47
  -5   6  -6   10.68    0.48
   5   6   6   11.69    0.44
  -6  -6  -6   10.82    0.46
   6  -6   6   10.81    0.51
  -6  -6  -6   11.24    0.42
   6   6   6   10.90    0.44
  -6   6  -6   10.72    0.49
   6   6   6    9.99    0.45
  -7  -6  -6    0.18    0.13
  -7  -6  -6    0.21    0.13
   7  -6   6    0.09    0.17
  -7   6  -6    0.27    0.15
   7   6   6    0.32    0.14
   7   6   6    0.26    0.13
  -8  -6  -6    5.49    0.34
   8  -6   6    6.76    0.44
  -8  -6  -6    6.65    0.37
  -8   6  -6    5.70    0.39
   8   6   6    5.52    0.36
   9  -6   6    2.60    0.34
  -9  -6  -6    3.26    0.32
   9   6   6    3.38    0.35
  -9   6  -6    2.75    0.34
  10  -6   6    1.77    0.31
 -10  -6  -6    1.66    0.26
 -10   6  -6    1.57    0.31
  10   6   6    1.35    0.26
 -11  -6  -6    0.56    0.22
  11  -6   6    0.65    0.25
 -11   6  -6    0.57    0.23
  11   6   6    0.68    0.22
  10  -7  -6    0.05    0.20
 -10  -7   6   -0.10    0.14
 -10   7   6   -0.06    0.18
  10   7  -6   -0.05    0.16
  -9  -7   6    0.71    0.20
   9  -7  -6    0.64    0.21
  -9   7   6    0.60    0.20
   9   7  -6    0.63    0.21
  -8  -7   6    2.06    0.28
   8  -7  -6    2.06    0.30
  -8   7   6    2.12    0.29
   8   7  -6    1.98    0.29
  -7  -7   6    5.00    0.35
   7  -7  -6    4.26    0.35
   7   7  -6    4.51    0.34
  -7   7   6    4.63    0.34
  -7   7   6    4.90    0.37
   6  -7  -6    0.09    0.14
   6  -7  -6    0.04    0.10
  -6  -7   6   -0.05    0.13
  -6   7   6    0.11    0.14
   6   7  -6    0.20    0.14
  -6   7   6    0.14    0.15
   5  -7  -6    3.95    0.31
  -5  -7   6    3.70    0.30
   5  -7  -6    3.50    0.27
  -5   7   6    3.65    0.28
  -5   7   6    4.29    0.32
   5   7  -6    3.40    0.29
  -4  -7   6    1.80    0.19
   4  -7  -6    1.61    0.24
  -4  -7   6    2.17    0.26
   4  -7  -6    1.97    0.22
   4   7  -6    1.97    0.24
   4   7  -6    1.94    0.20
  -4   7   6    1.71    0.24
  -4   7   6    2.38    0.25
  -3  -7   6    2.58    0.27
  -3  -7   6    2.62    0.21
   3  -7  -6    3.17    0.25
   3   7  -6    2.87    0.28
  -3   7   6    2.99    0.24
  -3   7   6    2.40    0.27
   3   7  -6    2.79    0.21
  -2  -7   6    3.74    0.25
  -2  -7   6    3.48    0.27
   2  -7  -6    3.44    0.27
   2   7  -6    3.85    0.25
  -2   7   6    3.05    0.24
   2   7  -6    3.14    0.26
  -2   7   6    2.97    0.26
  -1  -7   6   13.19    0.50
   1  -7  -6   12.08    0.49
  -1  -7   6   12.47    0.47
  -1   7   6   13.08    0.50
  -1   7   6   12.64    0.47
   1   7  -6   12.93    0.47
   1   7  -6   12.33    0.50
   0  -7  -6    3.39    0.26
   0  -7   6    2.61    0.25
   0  -7   6    2.90    0.25
   0   7   6    3.40    0.26
   0   7  -6    3.26    0.26
   0   7  -6    3.34    0.26
   0   7   6    2.86    0.22
   1  -7   6    5.00    0.31
   1  -7   6    4.74    0.30
  -1  -7  -6    4.88    0.31
   1   7   6    5.15    0.29
  -1   7  -6    5.39    0.32
  -1   7  -6    4.56    0.30
   1   7   6    4.92    0.31
   2  -7   6    8.86    0.43
  -2  -7  -6    9.10    0.43
   2  -7   6    8.80    0.38
   2   7   6    9.21    0.39
   2   7   6    9.59    0.42
  -2   7  -6    8.20    0.41
   3  -7   6    5.28    0.29
  -3  -7  -6    4.89    0.32
   3  -7   6    4.80    0.33
   3   7   6    5.27    0.31
   3   7   6    5.22    0.30
  -3   7  -6    4.49    0.32
   4  -7   6   24.05    0.81
  -4  -7  -6   24.29    0.79
   4  -7   6   24.25    0.70
   4   7   6   24.27    0.74
  -4   7  -6   24.81    0.80
   4   7   6   25.77    0.76
   5  -7   6    0.07    0.14
  -5  -7  -6    0.24    0.13
   5   7   6    0.13    0.12
   5   7   6    0.08    0.12
  -5   7  -6    0.00    0.13
  -6  -7  -6    4.12    0.31
   6  -7   6    4.09    0.35
  -6   7  -6    4.12    0.34
   6   7   6    3.86    0.30
   6   7   6    3.87    0.28
  -7  -7  -6    0.28    0.17
   7  -7   6    0.10    0.16
  -7   7  -6   -0.01    0.14
   7   7   6    0.26    0.15
   7   7   6    0.20    0.13
  -8  -7  -6    3.35    0.34
   8  -7   6    3.15    0.38
  -8   7  -6    3.58    0.37
   8   7   6    3.56    0.35
  -9  -7  -6    1.40    0.25
   9  -7   6    0.69    0.23
  -9   7  -6    0.76    0.23
   9   7   6    1.04    0.24
  10  -7   6    0.27    0.22
 -10   7  -6    0.31    0.21
  10   7   6    0.04    0.19
  -9  -8   6    2.01    0.32
   9  -8  -6    2.10    0.33
  -9   8   6    2.46    0.34
   9   8  -6    3.20    0.38
  -8  -8   6    0.04    0.16
   8  -8  -6    0.17    0.19
  -8   8   6    0.28    0.18
   8   8  -6    0.30    0.19
  -7  -8   6    0.47    0.19
   7  -8  -6    0.46    0.22
  -7   8   6    0.35    0.18
   7   8  -6    0.20    0.17
  -7   8   6    0.43    0.21
  -6  -8   6    3.75    0.37
   6  -8  -6    3.48    0.27
   6  -8  -6    3.49    0.37
  -6   8   6    3.45    0.35
   6   8  -6    3.47    0.36
  -6   8   6    4.06    0.40
  -5  -8   6    1.75    0.26
   5  -8  -6    1.34    0.25
   5  -8  -6    1.77    0.24
  -5   8   6    1.43    0.26
  -5   8   6    1.75    0.25
   5   8  -6    2.07    0.28
  -4  -8   6    1.03    0.21
   4  -8  -6    0.90    0.21
   4  -8  -6    1.29    0.22
   4   8  -6    0.95    0.22
  -4   8   6    1.29    0.23
  -4   8   6    0.99    0.21
   3  -8  -6    4.37    0.35
   3  -8  -6    4.21    0.30
  -3  -8   6    3.92    0.31
  -3  -8   6    3.92    0.27
  -3   8   6    4.21    0.38
   3   8  -6    3.84    0.31
  -3   8   6    4.60    0.32
   3   8  -6    3.74    0.27
  -2  -8   6    0.35    0.15
  -2  -8   6    0.49    0.15
   2  -8  -6    0.35    0.15
  -2   8   6    0.07    0.15
   2   8  -6    0.22    0.14
  -2   8   6    0.42    0.15
   2   8  -6    0.31    0.14
   1  -8  -6   16.10    0.60
  -1  -8   6   16.25    0.58
  -1  -8   6   15.61    0.60
  -1   8   6   15.64    0.60
   1   8  -6   16.25    0.62
  -1   8   6   15.53    0.57
   1   8  -6   16.00    0.58
   0  -8  -6   -0.03    0.13
   0  -8   6    0.22    0.15
   0  -8   6    0.29    0.15
   0   8  -6    0.06    0.12
   0   8  -6    0.27    0.16
   0   8   6    0.05    0.13
   0   8   6    0.26    0.14
   1  -8   6    7.82    0.39
  -1  -8  -6    6.27    0.38
   1  -8   6    6.08    0.37
  -1   8  -6    6.30    0.38
  -1   8  -6    6.58    0.38
   1   8   6    6.58    0.36
   1   8   6    6.71    0.37
   2  -8   6    0.09    0.12
  -2  -8  -6    0.07    0.13
   2  -8   6   -0.03    0.13
  -2   8  -6    0.12    0.14
   2   8   6    0.10    0.12
   2   8   6    0.01    0.12
   3  -8   6    1.25    0.19
   3  -8   6    1.27    0.23
  -3  -8  -6    1.13    0.22
  -3   8  -6    1.40    0.23
   3   8   6    1.21    0.20
   3   8   6    1.47    0.21
  -4  -8  -6   -0.02    0.12
   4  -8   6    0.11    0.12
   4  -8   6    0.08    0.15
   4   8   6    0.10    0.13
   4   8   6   -0.07    0.11
  -4   8  -6    0.06    0.13
  -5  -8  -6    0.26    0.16
   5  -8   6    0.33    0.18
   5   8   6    0.23    0.14
  -5   8  -6    0.06    0.15
   5   8   6    0.33    0.14
  -6  -8  -6    0.08    0.15
   6  -8   6    0.24    0.18
   6   8   6    0.16    0.14
  -6   8  -6    0.24    0.17
   6   8   6    0.10    0.15
   7  -8   6    1.01    0.25
  -7  -8  -6    1.13    0.25
   7   8   6    0.81    0.22
  -7   8  -6    0.55    0.20
   8  -8   6    0.64    0.25
  -8  -8  -6    0.56    0.22
  -8   8  -6    0.56    0.22
   8   8   6    0.63    0.20
   9  -8   6    0.24    0.24
  -9  -8  -6    0.27    0.18
  -9   8  -6    0.32    0.22
   9   8   6    0.65    0.21
  -8  -9   6    1.94    0.33
   8  -9  -6    1.67    0.31
   8   9  -6    2.28    0.34
  -8   9   6    1.92    0.31
  -7  -9   6    5.66    0.43
   7  -9  -6    5.82    0.46
  -7   9   6    6.00    0.43
  -7   9   6    6.38    0.48
   7   9  -6    6.74    0.45
   6  -9  -6   -0.03    0.17
  -6  -9   6    0.29    0.19
   6  -9  -6    0.26    0.18
  -6   9   6    0.19    0.16
  -6   9   6   -0.09    0.16
   6   9  -6    0.24    0.20
   5  -9  -6    8.87    0.45
  -5  -9   6    8.26    0.49
   5  -9  -6    9.05    0.53
  -5   9   6    9.25    0.48
  -5   9   6    8.52    0.51
   5   9  -6    9.41    0.51
   4  -9  -6    0.19    0.15
  -4  -9   6   -0.01    0.15
   4  -9  -6    0.11    0.17
   4   9  -6    0.07    0.16
  -4   9   6    0.13    0.17
  -4   9   6    0.20    0.17
   3  -9  -6    0.91    0.22
   3  -9  -6    1.04    0.21
  -3  -9   6    0.80    0.21
   3   9  -6    1.18    0.32
  -3   9   6    0.81    0.21
  -3   9   6    0.64    0.18
   3   9  -6    0.69    0.20
  -2  -9   6    0.44    0.18
   2  -9  -6    0.41    0.17
  -2  -9   6    0.33    0.16
  -2   9   6    0.33    0.17
   2   9  -6    0.25    0.16
  -2   9   6    0.19    0.17
   2   9  -6    0.30    0.16
  -1  -9   6    7.91    0.44
  -1  -9   6    8.00    0.41
   1  -9  -6    8.08    0.45
   1   9  -6    8.32    0.45
  -1   9   6    7.90    0.46
   1   9  -6    7.77    0.41
  -1   9   6    7.94    0.42
   0  -9   6    4.35    0.35
   0  -9   6    4.05    0.33
   0  -9  -6    3.81    0.37
   0   9  -6    3.91    0.33
   0   9  -6    3.80    0.37
   0   9   6    4.14    0.33
   0   9   6    3.89    0.31
  -1  -9  -6    7.77    0.44
   1  -9   6    6.95    0.43
   1  -9   6    7.40    0.42
  -1   9  -6    6.97    0.43
   1   9   6    7.93    0.42
  -1   9  -6    7.07    0.44
   1   9   6    7.14    0.41
   2  -9   6    3.62    0.36
  -2  -9  -6    3.96    0.39
   2  -9   6    3.92    0.32
   2   9   6    4.08    0.30
   2   9   6    4.15    0.32
  -2   9  -6    4.08    0.39
   3  -9   6    0.57    0.21
   3  -9   6    1.22    0.22
  -3  -9  -6    0.66    0.21
  -3   9  -6    1.05    0.23
   3   9   6    1.18    0.23
   3   9   6    0.87    0.19
  -4  -9  -6    0.03    0.17
   4  -9   6    0.18    0.16
   4  -9   6   -0.14    0.14
   4   9   6   -0.05    0.14
  -4   9  -6    0.02    0.16
   4   9   6    0.03    0.13
  -5  -9  -6    0.38    0.19
   5  -9   6    0.59    0.21
  -5   9  -6    0.52    0.20
   5   9   6    0.77    0.20
   5   9   6    0.52    0.20
   6  -9   6    4.18    0.44
  -6  -9  -6    5.09    0.42
   6   9   6    5.86    0.41
  -6   9  -6    5.24    0.42
  -7  -9  -6    0.90    0.24
   7  -9   6    1.82    0.33
   7   9   6    1.36    0.27
  -7   9  -6    1.32    0.29
  -6 -10   6    0.96    0.28
   6 -10  -6    1.04    0.28
  -6  10   6    1.22    0.29
   6  10  -6    0.80    0.25
  -6  10   6    1.03    0.25
   5 -10  -6    0.20    0.17
  -5 -10   6    0.12    0.18
   5 -10  -6    0.09    0.20
   5  10  -6    0.22    0.21
  -5  10   6    0.06    0.19
  -5  10   6    0.14    0.19
   4 -10  -6   -0.24    0.15
  -4 -10   6    0.04    0.18
   4 -10  -6   -0.25    0.16
  -4  10   6    0.00    0.15
   4  10  -6   -0.03    0.18
  -4  10   6   -0.14    0.16
  -3 -10   6    0.26    0.18
   3 -10  -6    0.06    0.20
   3 -10  -6    0.26    0.18
   3  10  -6    0.12    0.17
  -3  10   6    0.32    0.17
  -3  10   6   -0.09    0.18
   2 -10  -6    0.52    0.20
  -2 -10   6    0.88    0.24
   2 -10  -6    0.67    0.22
   2  10  -6    0.59    0.20
  -2  10   6    0.93    0.24
  -2  10   6    0.89    0.24
   2  10  -6    0.82    0.22
  -1 -10   6    1.57    0.27
   1 -10  -6    1.26    0.25
  -1 -10   6    1.34    0.25
  -1  10   6    1.62    0.27
  -1  10   6    1.08    0.25
   1  10  -6    1.46    0.25
   1  10  -6    1.06    0.25
   0 -10   6    0.40    0.20
   0 -10   6    0.13    0.15
   0 -10  -6    0.08    0.17
   0  10  -6    0.26    0.18
   0  10   6    0.30    0.17
   0  10  -6    0.48    0.20
   0  10   6    0.30    0.19
  -1 -10  -6   -0.17    0.14
   1 -10   6    0.04    0.19
   1 -10   6   -0.11    0.14
   1  10   6   -0.29    0.12
   1  10   6    0.34    0.18
  -1  10  -6    0.14    0.19
   2 -10   6    0.22    0.18
  -2 -10  -6    0.19    0.17
   2 -10   6    0.47    0.18
   2  10   6    0.29    0.18
   2  10   6    0.50    0.19
  -2  10  -6    0.54    0.21
   3 -10   6    0.33    0.20
   3 -10   6    0.28    0.17
  -3 -10  -6    0.13    0.17
   3  10   6    0.29    0.16
  -3  10  -6    0.17    0.18
   3  10   6    0.19    0.19
   4 -10   6    0.10    0.19
  -4 -10  -6   -0.23    0.18
   4  10   6    0.06    0.17
  -4  10  -6    0.07    0.18
   4  10   6    0.20    0.18
   5 -10   6    0.01    0.22
  -5 -10  -6   -0.10    0.17
  -5  10  -6    0.09    0.18
   5  10   6   -0.05    0.15
   3 -11  -6    0.76    0.23
   3 -11  -6    1.59    0.31
  -3 -11   6    1.34    0.28
  -3  11   6    1.16    0.27
   3  11  -6    1.64    0.30
  -3  11   6    0.95    0.26
   2 -11  -6    0.00    0.20
   2 -11  -6   -0.02    0.17
  -2 -11   6    0.14    0.20
  -2  11   6    0.10    0.19
  -2  11   6    0.05    0.19
   2  11  -6    0.19    0.18
   1 -11  -6    0.52    0.24
  -1 -11   6    0.41    0.21
   1 -11  -6    0.71    0.23
   1  11  -6    0.73    0.24
   1  11  -6    0.73    0.22
  -1  11   6    0.71    0.22
  -1  11   6    0.80    0.25
   0 -11  -6   -0.12    0.16
   0 -11   6    0.22    0.19
   0 -11  -6    0.10    0.18
   0 -11   6    0.28    0.22
   0  11   6    0.15    0.17
   0  11   6    0.18    0.19
   0  11  -6    0.07    0.19
   1 -11   6    1.88    0.31
  -1 -11  -6    1.52    0.30
   1 -11   6    1.48    0.28
   1  11   6    1.60    0.29
  -1  11  -6    1.22    0.28
   1  11   6    2.06    0.30
   2 -11   6    1.74    0.33
  -2 -11  -6    1.89    0.32
   2 -11   6    2.10    0.32
   2  11   6    1.37    0.28
  -2  11  -6    2.25    0.35
   2  11   6    1.52    0.28
 -13   0   7    0.01    0.19
  13   0  -7    0.19    0.19
  12   0  -7    0.03    0.16
 -12   0   7    0.12    0.16
  11   0  -7    0.02    0.15
 -11   0   7    0.02    0.14
 -10   0   7    0.22    0.14
  10   0  -7    0.10    0.13
  -9   0   7   -0.07    0.10
   9   0  -7   -0.04    0.10
  -9   0   7   -0.04    0.07
   9   0  -7    0.11    0.08
  -8   0   7    0.08    0.07
   8   0  -7    0.08    0.10
  -8   0   7    0.03    0.10
   8   0  -7    0.10    0.08
   7   0  -7    0.05    0.06
  -7   0   7    0.02    0.06
  -7   0   7   -0.01    0.09
   7   0  -7    0.04    0.08
   6   0  -7    0.04    0.05
  -6   0   7   -0.08    0.07
  -6   0   7    0.02    0.06
   6   0  -7    0.00    0.07
   5   0  -7   -0.02    0.06
  -5   0   7    0.01    0.05
   5   0  -7   -0.05    0.04
  -5   0   7   -0.08    0.07
   4   0  -7    0.04    0.04
   4   0  -7   -0.01    0.05
  -4   0   7   -0.01    0.03
  -4   0   7   -0.07    0.06
  -4   0   7    0.03    0.05
  -3   0   7    0.00    0.04
  -3   0   7   -0.04    0.03
   3   0  -7   -0.02    0.04
  -3   0   7   -0.07    0.04
  -2   0   7   -0.05    0.02
  -2   0   7    0.00    0.04
   2   0  -7    0.00    0.04
  -2   0   7   -0.03    0.04
   2   0  -7    0.00    0.03
   1   0  -7    0.03    0.02
  -1   0   7    0.02    0.04
   1   0  -7    0.05    0.04
  -1   0   7    0.08    0.03
   0   0  -7   -0.03    0.02
   0   0   7   -0.06    0.03
   0   0   7    0.00    0.04
   0   0  -7   -0.04    0.03
   0   0   7   -0.01    0.02
  -1   0  -7   -0.07    0.05
   1   0   7   -0.14    0.04
  -1   0  -7   -0.09    0.03
   1   0   7   -0.11    0.03
  -2   0  -7   -0.06    0.04
  -2   0  -7   -0.03    0.03
   2   0   7    0.07    0.03
   2   0   7   -0.04    0.04
  -3   0  -7   -0.08    0.04
  -3   0  -7   -0.10    0.05
   3   0   7   -0.03    0.05
   3   0   7    0.01    0.04
  -3   0  -7    0.05    0.03
   4   0   7    0.03    0.06
  -4   0  -7    0.01    0.03
   4   0   7   -0.06    0.05
  -4   0  -7    0.02    0.06
  -4   0  -7   -0.09    0.04
  -5   0  -7    0.00    0.07
   5   0   7    0.04    0.07
  -5   0  -7    0.03    0.03
   5   0   7   -0.02    0.07
  -5   0  -7   -0.01    0.06
  -6   0  -7    0.00    0.02
  -6   0  -7    0.09    0.09
   6   0   7    0.03    0.08
   6   0   7    0.07    0.08
  -6   0  -7   -0.04    0.07
  -7   0  -7   -0.02    0.09
  -7   0  -7    0.11    0.10
   7   0   7    0.10    0.10
   7   0   7    0.04    0.08
  -8   0  -7    0.07    0.11
  -8   0  -7    0.07    0.11
   8   0   7    0.06    0.11
   8   0   7    0.09    0.11
   9   0   7    0.01    0.11
  -9   0  -7   -0.14    0.10
   9   0   7    0.11    0.11
  10   0   7    0.04    0.13
 -10   0  -7   -0.03    0.13
  10   0   7    0.01    0.12
  11   0   7   -0.01    0.12
 -11   0  -7    0.12    0.15
  11   0   7   -0.12    0.14
 -12   0  -7    0.17    0.18
  12   0   7    0.18    0.16
  12   0   7    0.04    0.16
  13   0   7    0.01    0.18
 -13   0  -7    0.14    0.19
 -13  -1   7    1.44    0.28
  13  -1  -7    1.85    0.30
  13   1  -7    1.63    0.30
 -13   1   7    1.79    0.31
  12  -1  -7    2.88    0.34
 -12  -1   7    3.06    0.34
  12   1  -7    3.33    0.36
 -12   1   7    3.05    0.34
  11  -1  -7    7.26    0.43
 -11  -1   7    7.15    0.42
 -11   1   7    7.09    0.41
  11   1  -7    7.15    0.43
 -10  -1   7    0.06    0.13
  10  -1  -7    0.13    0.14
  10  -1  -7    0.11    0.13
  10   1  -7    0.05    0.14
 -10   1   7    0.17    0.14
  -9  -1   7    0.48    0.11
  -9  -1   7    0.33    0.14
   9  -1  -7    0.66    0.14
   9  -1  -7    0.47    0.15
   9   1  -7    0.51    0.15
  -9   1   7    0.25    0.13
  -8  -1   7   29.86    0.75
  -8  -1   7   28.40    0.82
   8  -1  -7   29.05    0.75
   8  -1  -7   29.59    0.84
  -8   1   7   29.91    0.83
   8   1  -7   28.59    0.69
   8   1  -7   28.62    0.83
  -8   1   7   28.24    0.83
  -8   1   7   29.64    0.72
   7  -1  -7    5.62    0.24
  -7  -1   7    5.73    0.24
  -7  -1   7    6.35    0.30
   7  -1  -7    5.93    0.29
   7   1  -7    5.45    0.29
  -7   1   7    6.04    0.23
   7   1  -7    5.80    0.20
  -7   1   7    5.71    0.29
  -7   1   7    5.29    0.28
   6  -1  -7   11.57    0.40
   6  -1  -7   11.14    0.35
  -6  -1   7   11.67    0.40
  -6  -1   7   11.38    0.36
  -6   1   7   11.63    0.35
  -6   1   7   11.29    0.40
   6   1  -7   12.20    0.41
   6   1  -7   11.67    0.30
  -6   1   7   11.94    0.40
   5  -1  -7  105.69    2.18
  -5  -1   7  105.24    2.24
   5  -1  -7  106.68    2.24
  -5  -1   7  104.61    2.20
  -5   1   7  104.08    2.18
  -5   1   7  105.28    2.18
  -5   1   7  105.30    2.23
   5   1  -7  105.39    2.24
  -5   1   7  107.05    2.24
   5   1  -7  104.77    2.10
   4  -1  -7  380.97    7.49
  -4  -1   7  378.95    7.52
   4  -1  -7  379.29    7.53
  -4  -1   7  386.63    7.54
   4   1  -7  375.94    7.46
   4   1  -7  378.83    7.54
  -4   1   7  375.55    7.49
   4   1  -7  379.34    7.43
  -4   1   7  378.38    7.53
  -4   1   7  381.49    7.53
  -4   1   7  368.16    7.50
   3  -1  -7   26.96    0.62
  -3  -1   7   27.01    0.64
  -3  -1   7   26.09    0.64
  -3   1   7   27.72    0.61
  -3   1   7   26.45    0.63
   3   1  -7   26.35    0.63
  -3   1   7   26.63    0.62
  -3   1   7   27.13    0.63
  -2  -1   7   40.84    0.90
  -2  -1   7   41.84    0.83
   2  -1  -7   41.01    0.88
  -2  -1   7   41.89    0.91
   2  -1  -7   42.40    0.91
  -2   1   7   42.04    0.89
  -2   1   7   41.17    0.90
   2   1  -7   40.76    0.91
  -2   1   7   41.80    0.90
   2   1  -7   40.87    0.90
  -2   1   7   40.40    0.88
   2   1  -7   42.39    0.83
   1  -1  -7   23.23    0.53
  -1  -1   7   22.62    0.54
  -1  -1   7   23.47    0.51
   1   1  -7   22.71    0.54
   1   1  -7   23.14    0.52
  -1   1   7   23.32    0.49
  -1   1   7   22.99    0.54
  -1   1   7   23.08    0.53
   0  -1  -7   69.18    1.35
   0  -1   7   67.52    1.41
   0  -1   7   68.89    1.42
   0  -1  -7   67.80    1.42
   0   1  -7   68.35    1.40
   0   1   7   68.02    1.35
   0   1   7   69.56    1.43
   0   1  -7   68.91    1.42
   0   1   7   67.61    1.43
  -1  -1  -7  123.08    2.44
   1  -1   7  122.64    2.46
   1  -1   7  119.93    2.41
  -1  -1  -7  118.34    2.45
   1   1   7  120.74    2.46
  -1   1  -7  120.73    2.43
  -1   1  -7  117.58    2.45
   1   1   7  119.83    2.43
   1   1   7  121.42    2.39
  -2  -1  -7   17.88    0.47
   2  -1   7   17.40    0.40
  -2  -1  -7   17.99    0.43
   2  -1   7   18.17    0.48
   2   1   7   17.96    0.42
  -2   1  -7   18.41    0.45
   2   1   7   18.75    0.47
  -3  -1  -7   74.23    1.58
  -3  -1  -7   70.52    1.50
   3  -1   7   75.43    1.59
   3  -1   7   71.57    1.44
  -3   1  -7   73.87    1.45
   3   1   7   71.22    1.52
  -3   1  -7   70.93    1.56
   3   1   7   72.26    1.56
  -3   1  -7   72.51    1.55
   4  -1   7   53.09    1.21
  -4  -1  -7   51.34    1.20
  -4  -1  -7   51.85    1.10
   4   1   7   51.61    1.16
   4   1   7   52.11    1.19
  -4   1  -7   52.25    1.20
  -4   1  -7   52.90    1.18
   5  -1   7   10.26    0.38
  -5  -1  -7   10.53    0.29
  -5  -1  -7   10.09    0.37
   5   1   7   10.33    0.36
  -5   1  -7   10.36    0.36
   5   1   7   10.58    0.35
  -5   1  -7   10.07    0.37
  -6  -1  -7    9.23    0.26
   6  -1   7    8.59    0.36
  -6  -1  -7    8.73    0.37
   6  -1   7    9.34    0.36
   6   1   7    9.27    0.36
   6   1   7    9.28    0.35
  -6   1  -7    9.38    0.37
  -6   1  -7    9.65    0.37
   7  -1   7   23.75    0.70
  -7  -1  -7   21.87    0.69
   7  -1   7   23.35    0.70
   7   1   7   24.11    0.69
  -7   1  -7   21.99    0.69
  -7   1  -7   23.52    0.70
   7   1   7   23.01    0.68
   8  -1   7    0.14    0.11
  -8  -1  -7    0.22    0.12
   8  -1   7    0.16    0.12
  -8   1  -7    0.15    0.12
   8   1   7    0.19    0.11
  -8   1  -7    0.06    0.11
   8   1   7    0.13    0.12
  -9  -1  -7    4.76    0.33
   9  -1   7    4.60    0.31
   9  -1   7    4.48    0.31
   9   1   7    5.15    0.32
  -9   1  -7    4.96    0.33
   9   1   7    5.09    0.31
  -9   1  -7    4.39    0.31
 -10  -1  -7    1.68    0.26
  10  -1   7    2.12    0.27
  10  -1   7    2.06    0.26
  10   1   7    1.77    0.25
  10   1   7    1.85    0.24
 -10   1  -7    1.43    0.24
 -10   1  -7    1.82    0.26
 -11  -1  -7    3.17    0.35
  11  -1   7    3.36    0.35
  11  -1   7    2.63    0.30
  11   1   7    3.62    0.36
 -11   1  -7    3.73    0.38
  11   1   7    3.26    0.32
 -11   1  -7    3.15    0.35
  12  -1   7    0.05    0.17
  12  -1   7   -0.07    0.13
 -12  -1  -7   -0.04    0.16
 -12   1  -7   -0.13    0.15
  12   1   7    0.04    0.17
  13  -2  -7    1.66    0.29
 -13  -2   7    1.58    0.28
 -13   2   7    1.25    0.26
  13   2  -7    1.54    0.29
 -12  -2   7    0.89    0.23
  12  -2  -7    0.65    0.22
 -12   2   7    1.23    0.24
  12   2  -7    1.14    0.25
  11  -2  -7   -0.05    0.16
 -11  -2   7    0.26    0.16
 -11   2   7    0.29    0.16
  11   2  -7    0.25    0.18
 -11   2   7    0.17    0.17
  10  -2  -7    4.73    0.30
 -10  -2   7    5.01    0.33
  10  -2  -7    4.87    0.34
  10   2  -7    4.99    0.36
 -10   2   7    5.01    0.34
 -10   2   7    4.64    0.34
  -9  -2   7    1.04    0.19
   9  -2  -7    0.99    0.16
   9  -2  -7    0.98    0.19
  -9  -2   7    0.96    0.15
  -9   2   7    0.76    0.17
   9   2  -7    1.25    0.20
  -9   2   7    1.14    0.20
  -8  -2   7    5.09    0.25
  -8  -2   7    4.02    0.27
   8  -2  -7    4.57    0.26
   8  -2  -7    4.33    0.28
  -8   2   7    4.70    0.21
  -8   2   7    4.51    0.27
   8   2  -7    4.44    0.28
  -8   2   7    4.14    0.28
  -7  -2   7   18.80    0.59
   7  -2  -7   19.81    0.61
  -7  -2   7   18.99    0.55
   7  -2  -7   19.53    0.56
   7   2  -7   18.87    0.60
  -7   2   7   19.57    0.58
   7   2  -7   18.61    0.44
  -7   2   7   19.10    0.60
  -7   2   7   19.23    0.51
   6  -2  -7   56.85    1.32
  -6  -2   7   56.60    1.28
   6  -2  -7   56.86    1.28
  -6  -2   7   56.74    1.31
   6   2  -7   55.31    1.32
  -6   2   7   56.57    1.32
  -6   2   7   56.10    1.30
   6   2  -7   55.49    1.14
  -6   2   7   57.18    1.24
  -5  -2   7   25.62    0.66
  -5  -2   7   26.13    0.67
   5  -2  -7   25.33    0.65
   5   2  -7   25.72    0.52
  -5   2   7   25.21    0.67
   5   2  -7   25.98    0.69
  -5   2   7   26.29    0.63
  -5   2   7   26.26    0.66
  -5   2   7   25.15    0.65
   5   2  -7   25.13    0.52
  -4  -2   7   37.84    0.91
  -4  -2   7   38.62    0.91
  -4   2   7   40.11    0.91
  -4   2   7   38.74    0.90
  -4   2   7   38.51    0.88
  -4   2   7   38.91    0.89
  -3  -2   7    0.34    0.02
  -3  -2   7    0.37    0.03
  -3  -2   7    0.39    0.08
  -3  -2   7    0.35    0.08
  -3   2   7    0.27    0.06
   3   2  -7    0.30    0.07
  -3   2   7    0.33    0.07
  -3   2   7    0.29    0.07
  -3   2   7    0.48    0.08
   2  -2  -7    0.66    0.08
   2  -2  -7    0.60    0.09
  -2  -2   7    0.71    0.05
  -2  -2   7    0.88    0.10
  -2  -2   7    0.74    0.08
   2   2  -7    0.74    0.09
  -2   2   7    0.76    0.08
  -2   2   7    0.74    0.08
  -2   2   7    0.54    0.08
   2   2  -7    0.74    0.09
  -2   2   7    0.56    0.08
   1  -2  -7   69.11    1.42
  -1  -2   7   68.46    1.46
  -1  -2   7   69.58    1.42
   1  -2  -7   69.98    1.47
  -1   2   7   68.11    1.46
   1   2  -7   67.98    1.45
  -1   2   7   69.45    1.46
  -1   2   7   68.98    1.41
   0  -2   7    8.98    0.27
   0  -2  -7    9.41    0.26
   0  -2  -7    9.08    0.28
   0  -2   7    9.44    0.27
   0   2  -7    9.60    0.28
   0   2  -7    9.21    0.26
   0   2   7    9.48    0.28
   0   2   7    8.97    0.28
   0   2   7    9.35    0.23
   1  -2   7  100.89    2.08
  -1  -2  -7  101.31    2.12
   1  -2   7  103.74    2.13
  -1  -2  -7  104.51    2.10
   1   2   7  101.28    2.06
  -1   2  -7  102.52    2.10
   1   2   7  102.54    2.13
  -1   2  -7  103.03    2.12
   2  -2   7   -0.02    0.06
   2  -2   7   -0.03    0.03
  -2  -2  -7    0.00    0.05
  -2  -2  -7   -0.09    0.05
  -2   2  -7   -0.03    0.04
  -2   2  -7   -0.01    0.05
   2   2   7   -0.06    0.05
   2   2   7    0.07    0.05
  -3  -2  -7    1.56    0.12
  -3  -2  -7    2.07    0.14
   3  -2   7    1.74    0.08
   3  -2   7    1.68    0.14
   3   2   7    1.92    0.11
   3   2   7    1.67    0.13
  -3   2  -7    1.82    0.13
  -3   2  -7    1.73    0.13
   4  -2   7   49.81    0.99
  -4  -2  -7   48.61    1.09
  -4  -2  -7   49.74    1.15
   4  -2   7   49.06    1.17
  -4   2  -7   49.58    0.99
   4   2   7   49.01    1.13
   4   2   7   49.36    1.11
  -4   2  -7   49.82    1.14
  -4   2  -7   49.63    1.15
  -5  -2  -7    3.32    0.21
   5  -2   7    4.10    0.24
  -5  -2  -7    3.95    0.18
   5   2   7    3.80    0.21
  -5   2  -7    3.23    0.21
   5   2   7    3.64    0.20
  -5   2  -7    3.63    0.21
   6  -2   7   27.40    0.78
  -6  -2  -7   26.96    0.76
  -6  -2  -7   27.95    0.67
  -6   2  -7   26.96    0.76
  -6   2  -7   27.16    0.75
   6   2   7   27.75    0.74
   6   2   7   26.97    0.73
   7  -2   7    1.69    0.21
  -7  -2  -7    1.63    0.13
  -7  -2  -7    1.32    0.19
   7   2   7    1.63    0.19
  -7   2  -7    1.53    0.19
  -7   2  -7    1.41    0.19
   7   2   7    1.88    0.20
   8  -2   7    3.44    0.27
   8  -2   7    3.46    0.27
  -8  -2  -7    3.89    0.28
  -8   2  -7    4.15    0.28
  -8   2  -7    3.82    0.28
   8   2   7    4.04    0.28
   8   2   7    3.96    0.26
   9  -2   7    0.08    0.13
   9  -2   7    0.27    0.15
  -9  -2  -7    0.19    0.13
  -9   2  -7    0.24    0.14
  -9   2  -7    0.16    0.14
   9   2   7    0.22    0.13
   9   2   7    0.26    0.13
  10  -2   7    7.22    0.43
 -10  -2  -7    6.70    0.41
  10  -2   7    6.64    0.41
 -10   2  -7    7.71    0.43
  10   2   7    7.12    0.40
 -10   2  -7    7.95    0.45
  10   2   7    7.12    0.38
  11  -2   7    0.78    0.23
 -11  -2  -7    0.55    0.21
  11  -2   7    0.52    0.20
 -11   2  -7    0.35    0.17
 -11   2  -7    0.75    0.23
  11   2   7    0.62    0.20
  12  -2   7    0.00    0.16
 -12  -2  -7   -0.09    0.16
  12  -2   7    0.10    0.18
 -12   2  -7    0.30    0.19
 -12   2  -7   -0.10    0.17
  12   2   7   -0.05    0.17
  13  -3  -7    0.00    0.17
 -13  -3   7    0.02    0.17
  13   3  -7   -0.07    0.17
 -13   3   7    0.12    0.20
  12  -3  -7    3.12    0.36
 -12  -3   7    2.43    0.34
 -12   3   7    3.17    0.34
  12   3  -7    2.87    0.35
 -12   3   7    2.93    0.35
  11  -3  -7    1.63    0.24
 -11  -3   7    1.74    0.26
  11  -3  -7    1.78    0.27
  11   3  -7    1.09    0.23
 -11   3   7    1.73    0.27
 -11   3   7    1.75    0.26
 -10  -3   7   11.97    0.46
  10  -3  -7   11.88    0.49
  10  -3  -7   11.22    0.52
 -10  -3   7   12.02    0.52
 -10   3   7   11.81    0.50
 -10   3   7   11.21    0.53
  10   3  -7   10.66    0.51
   9  -3  -7   26.65    0.83
   9  -3  -7   25.40    0.78
  -9  -3   7   27.33    0.76
  -9  -3   7   25.85    0.81
  -9   3   7   26.75    0.84
   9   3  -7   26.69    0.84
  -9   3   7   26.71    0.79
  -8  -3   7    0.54    0.15
   8  -3  -7    0.70    0.16
   8  -3  -7    1.05    0.13
   8  -3  -7    0.84    0.16
  -8  -3   7    0.86    0.15
  -8   3   7    0.57    0.11
  -8   3   7    0.75    0.17
   8   3  -7    0.49    0.14
  -8   3   7    0.79    0.16
  -7  -3   7   45.56    1.14
  -7  -3   7   44.76    1.11
   7  -3  -7   46.22    1.05
   7  -3  -7   46.20    1.13
  -7   3   7   44.83    1.11
  -7   3   7   45.74    1.05
  -7   3   7   44.26    1.15
   7   3  -7   45.14    1.16
  -6  -3   7    3.63    0.22
   6  -3  -7    3.39    0.19
  -6  -3   7    3.78    0.23
   6  -3  -7    3.72    0.23
   6   3  -7    3.43    0.11
  -6   3   7    3.90    0.23
  -6   3   7    3.70    0.19
  -6   3   7    3.31    0.22
  -6   3   7    3.48    0.21
   6   3  -7    3.42    0.23
   5  -3  -7   23.70    0.62
   5  -3  -7   24.46    0.66
  -5  -3   7   24.13    0.66
  -5  -3   7   24.10    0.64
  -5   3   7   23.86    0.66
  -5   3   7   23.97    0.62
  -5   3   7   24.46    0.62
  -5   3   7   24.63    0.66
   5   3  -7   23.82    0.51
   5   3  -7   24.90    0.68
   4  -3  -7    3.05    0.17
  -4  -3   7    3.51    0.18
  -4  -3   7    3.46    0.19
   4   3  -7    3.37    0.11
   4   3  -7    3.69    0.20
  -4   3   7    3.38    0.16
  -4   3   7    3.24    0.19
  -4   3   7    3.41    0.18
  -4   3   7    3.25    0.19
  -3  -3   7  133.24    2.68
   3  -3  -7  129.41    2.65
  -3  -3   7  130.49    2.60
   3  -3  -7  130.62    2.70
  -3  -3   7  127.52    2.72
  -3   3   7  127.34    2.69
   3   3  -7  127.77    2.60
   3   3  -7  136.46    2.73
  -3   3   7  128.48    2.71
  -3   3   7  132.00    2.65
  -3   3   7  129.69    2.69
  -2  -3   7   90.60    1.85
   2  -3  -7   90.48    1.93
   2  -3  -7   91.45    1.86
  -2  -3   7   92.93    1.94
  -2  -3   7   90.36    1.88
  -2   3   7   89.01    1.92
  -2   3   7   89.87    1.89
  -2   3   7   91.10    1.93
   2   3  -7   90.50    1.88
   2   3  -7   91.70    1.93
   2   3  -7   91.19    1.85
  -1  -3   7   62.88    1.35
   1  -3  -7   64.20    1.33
  -1  -3   7   62.67    1.39
   1  -3  -7   65.20    1.40
  -1   3   7   65.21    1.40
   1   3  -7   63.99    1.34
   1   3  -7   63.65    1.39
  -1   3   7   64.07    1.35
   0  -3   7   33.57    0.79
   0  -3   7   33.50    0.79
   0  -3  -7   33.29    0.75
   0  -3  -7   33.66    0.81
   0   3   7   35.15    0.82
   0   3   7   34.92    0.76
   0   3  -7   34.62    0.81
   0   3  -7   33.83    0.75
   1  -3   7  185.86    3.77
  -1  -3  -7  188.10    3.81
   1  -3   7  188.79    3.81
  -1  -3  -7  187.98    3.75
   1   3   7  182.44    3.74
  -1   3  -7  188.55    3.81
  -1   3  -7  183.96    3.74
   1   3   7  190.43    3.81
   2  -3   7   23.32    0.61
  -2  -3  -7   22.41    0.59
   2  -3   7   22.66    0.54
  -2  -3  -7   21.82    0.56
   2   3   7   24.49    0.61
  -2   3  -7   22.69    0.55
  -2   3  -7   21.65    0.59
   2   3   7   22.73    0.55
   3  -3   7   33.59    0.75
  -3  -3  -7   34.26    0.82
  -3  -3  -7   33.99    0.81
   3  -3   7   33.71    0.85
  -3   3  -7   33.07    0.79
   3   3   7   33.85    0.79
  -3   3  -7   33.33    0.83
   3   3   7   33.61    0.83
   4  -3   7   17.40    0.41
   4  -3   7   16.93    0.54
  -4  -3  -7   17.31    0.49
  -4  -3  -7   17.21    0.50
   4   3   7   17.08    0.48
   4   3   7   17.99    0.52
  -4   3  -7   16.85    0.52
  -4   3  -7   17.91    0.50
   5  -3   7    9.64    0.39
  -5  -3  -7    9.35    0.33
  -5  -3  -7    9.35    0.36
   5  -3   7    9.55    0.23
  -5   3  -7    9.16    0.37
   5   3   7    9.91    0.36
  -5   3  -7    9.71    0.35
   5   3   7    9.59    0.35
  -6  -3  -7   13.31    0.42
  -6  -3  -7   13.69    0.48
   6  -3   7   12.70    0.49
  -6   3  -7   12.96    0.48
  -6   3  -7   13.16    0.46
   6   3   7   13.02    0.45
   6   3   7   13.75    0.46
  -7  -3  -7    7.94    0.32
  -7  -3  -7    8.05    0.38
   7  -3   7    8.36    0.40
   7   3   7    9.02    0.37
   7   3   7    8.69    0.37
  -7   3  -7    7.84    0.38
  -7   3  -7    8.29    0.37
   8  -3   7    2.87    0.29
  -8  -3  -7    2.38    0.26
   8   3   7    2.50    0.24
  -8   3  -7    2.19    0.24
   8   3   7    2.00    0.23
  -8   3  -7    2.32    0.26
   9  -3   7    1.73    0.24
  -9  -3  -7    1.38    0.22
   9  -3   7    1.26    0.22
  -9   3  -7    1.51    0.22
   9   3   7    1.66    0.21
   9   3   7    0.82    0.18
  -9   3  -7    1.30    0.22
  10  -3   7    0.36    0.18
 -10  -3  -7    0.53    0.18
  10  -3   7    0.36    0.18
 -10   3  -7    0.84    0.21
  10   3   7    0.70    0.19
 -10   3  -7    0.51    0.18
  10   3   7    0.57    0.16
  11  -3   7    5.07    0.39
 -11  -3  -7    4.50    0.37
  11  -3   7    4.56    0.39
 -11   3  -7    4.76    0.37
 -11   3  -7    4.80    0.39
  11   3   7    4.80    0.36
 -12  -3  -7    4.79    0.40
  12  -3   7    5.24    0.41
  12  -3   7    5.18    0.42
  12   3   7    5.33    0.41
 -12   3  -7    5.53    0.41
 -12   3  -7    5.63    0.44
 -12  -4   7    0.13    0.17
  12  -4  -7    0.23    0.19
  12   4  -7    0.37    0.20
 -12   4   7    0.41    0.19
 -12   4   7    0.37    0.21
  11  -4  -7    0.26    0.18
  11  -4  -7    0.32    0.18
 -11  -4   7    0.42    0.18
 -11   4   7    0.28    0.18
 -11   4   7    0.36    0.16
  11   4  -7    0.31    0.19
 -10  -4   7    0.13    0.14
  10  -4  -7    0.05    0.13
  10  -4  -7    0.19    0.15
 -10  -4   7    0.08    0.13
 -10   4   7    0.12    0.15
 -10   4   7    0.13    0.14
  10   4  -7   -0.03    0.14
  -9  -4   7    2.81    0.26
   9  -4  -7    3.06    0.31
  -9  -4   7    2.94    0.28
   9  -4  -7    2.49    0.27
  -9   4   7    2.83    0.28
   9   4  -7    2.86    0.30
  -9   4   7    3.38    0.33
  -8  -4   7    0.30    0.13
   8  -4  -7    0.21    0.10
   8  -4  -7    0.26    0.14
  -8  -4   7    0.14    0.11
  -8   4   7    0.21    0.11
   8   4  -7    0.17    0.12
  -8   4   7    0.52    0.15
   7  -4  -7    4.73    0.30
  -7  -4   7    5.25    0.29
  -7  -4   7    4.88    0.28
   7  -4  -7    4.71    0.24
  -7   4   7    4.22    0.25
  -7   4   7    4.50    0.29
   7   4  -7    4.90    0.30
  -7   4   7    4.84    0.29
  -6  -4   7   10.53    0.41
   6  -4  -7   10.46    0.42
   6  -4  -7   10.82    0.37
  -6  -4   7   10.73    0.40
  -6   4   7    9.80    0.41
   6   4  -7   11.14    0.43
  -6   4   7   10.51    0.37
  -6   4   7   10.57    0.36
  -6   4   7   10.38    0.41
  -5  -4   7    0.10    0.08
   5  -4  -7    0.07    0.10
   5  -4  -7    0.03    0.07
  -5  -4   7    0.08    0.09
  -5   4   7    0.03    0.08
   5   4  -7   -0.01    0.09
   5   4  -7    0.10    0.05
  -5   4   7    0.00    0.10
  -5   4   7    0.05    0.07
   4  -4  -7    9.35    0.34
  -4  -4   7    9.38    0.36
  -4  -4   7    9.70    0.32
  -4   4   7    9.97    0.35
  -4   4   7    9.09    0.36
   4   4  -7    9.59    0.27
  -4   4   7    9.89    0.30
   4   4  -7    9.44    0.37
  -3  -4   7   13.00    0.37
  -3  -4   7   12.82    0.34
  -3  -4   7   12.41    0.42
   3  -4  -7   12.21    0.40
   3  -4  -7   12.37    0.34
  -3   4   7   13.45    0.43
   3   4  -7   13.05    0.34
  -3   4   7   12.90    0.34
  -3   4   7   12.54    0.40
   3   4  -7   12.46    0.42
  -2  -4   7    2.03    0.16
  -2  -4   7    2.11    0.12
   2  -4  -7    2.60    0.17
  -2  -4   7    1.94    0.13
   2  -4  -7    2.26    0.11
   2   4  -7    2.32    0.17
  -2   4   7    2.21    0.17
  -2   4   7    2.16    0.15
   2   4  -7    2.25    0.13
   2   4  -7    2.13    0.13
   1  -4  -7    6.17    0.19
  -1  -4   7    6.27    0.24
   1  -4  -7    6.69    0.27
  -1  -4   7    6.16    0.26
   1   4  -7    6.07    0.20
   1   4  -7    6.53    0.24
   1   4  -7    6.76    0.27
  -1   4   7    6.36    0.24
  -1   4   7    6.33    0.27
   0  -4   7    3.12    0.18
   0  -4  -7    3.13    0.13
   0  -4   7    3.18    0.18
   0  -4  -7    2.93    0.18
   0   4  -7    3.04    0.13
   0   4  -7    3.12    0.19
   0   4   7    2.88    0.18
   0   4   7    2.80    0.15
   1  -4   7    7.02    0.26
  -1  -4  -7    6.75    0.22
  -1  -4  -7    6.64    0.28
   1  -4   7    6.09    0.27
  -1   4  -7    6.50    0.21
  -1   4  -7    7.18    0.28
   1   4   7    6.47    0.24
   1   4   7    6.62    0.27
  -2  -4  -7    8.06    0.27
   2  -4   7    8.28    0.33
  -2  -4  -7    7.79    0.31
   2  -4   7    8.02    0.28
  -2   4  -7    7.28    0.31
  -2   4  -7    8.65    0.26
   2   4   7    8.32    0.28
   2   4   7    8.52    0.32
  -3  -4  -7   18.04    0.48
   3  -4   7   16.71    0.45
   3  -4   7   17.48    0.54
  -3  -4  -7   16.97    0.51
  -3   4  -7   17.07    0.46
   3   4   7   15.92    0.47
   3   4   7   16.19    0.50
  -3   4  -7   16.74    0.52
   4  -4   7    7.03    0.23
  -4  -4  -7    6.50    0.29
   4  -4   7    7.34    0.34
  -4  -4  -7    6.24    0.27
   4   4   7    6.79    0.28
   4   4   7    7.01    0.30
  -4   4  -7    6.84    0.27
  -4   4  -7    5.93    0.30
   5  -4   7   25.94    0.78
   5  -4   7   26.35    0.61
  -5  -4  -7   26.23    0.72
  -5  -4  -7   27.57    0.73
  -5   4  -7   27.02    0.77
   5   4   7   26.47    0.73
  -5   4  -7   27.40    0.71
   5   4   7   26.12    0.72
  -6  -4  -7   47.78    1.20
  -6  -4  -7   48.44    1.18
   6   4   7   50.58    1.20
   6   4   7   48.37    1.19
  -6   4  -7   46.98    1.24
  -6   4  -7   49.00    1.18
  -7  -4  -7    0.66    0.15
   7  -4   7    0.62    0.17
  -7  -4  -7    0.57    0.14
  -7   4  -7    0.79    0.16
  -7   4  -7    0.69    0.17
   7   4   7    0.93    0.16
   7   4   7    0.51    0.14
  -8  -4  -7   11.39    0.48
   8  -4   7   10.93    0.51
  -8  -4  -7   10.50    0.41
  -8   4  -7   10.94    0.50
  -8   4  -7   10.22    0.45
   8   4   7   11.56    0.45
   8   4   7   10.94    0.46
   9  -4   7    4.20    0.34
  -9  -4  -7    3.69    0.34
   9   4   7    3.51    0.27
  -9   4  -7    3.26    0.34
  -9   4  -7    3.52    0.32
   9   4   7    3.71    0.29
 -10  -4  -7    2.92    0.33
  10  -4   7    3.38    0.37
 -10   4  -7    2.73    0.30
 -10   4  -7    3.37    0.36
  10   4   7    2.97    0.33
  11  -4   7    0.03    0.15
 -11  -4  -7   -0.03    0.14
  11  -4   7    0.22    0.18
 -11   4  -7    0.00    0.14
  11   4   7    0.05    0.17
 -11   4  -7   -0.09    0.15
  12  -4   7    0.59    0.24
 -12  -4  -7    0.52    0.23
  12  -4   7    0.41    0.21
 -12   4  -7    0.36    0.20
  12   4   7    0.38    0.22
 -12   4  -7    0.28    0.22
  12  -5  -7    0.12    0.19
  12  -5  -7    0.17    0.17
 -12  -5   7    0.37    0.19
 -12   5   7    0.36    0.21
  12   5  -7    0.08    0.19
  11  -5  -7    0.61    0.21
  11  -5  -7    0.44    0.21
 -11  -5   7    1.23    0.24
 -11   5   7    0.99    0.24
  11   5  -7    1.10    0.26
 -11   5   7    0.87    0.20
  10  -5  -7    0.15    0.16
  10  -5  -7    0.03    0.14
 -10  -5   7    0.13    0.15
 -10  -5   7    0.24    0.15
 -10   5   7    0.35    0.16
  10   5  -7    0.16    0.16
 -10   5   7    0.13    0.15
   9  -5  -7    3.06    0.32
  -9  -5   7    3.15    0.26
  -9  -5   7    3.39    0.31
   9   5  -7    3.08    0.32
  -9   5   7    3.38    0.33
  -9   5   7    3.01    0.25
   8  -5  -7    0.04    0.12
  -8  -5   7    0.00    0.11
  -8  -5   7    0.14    0.13
  -8   5   7    0.18    0.13
  -8   5   7    0.13    0.11
   8   5  -7    0.07    0.12
  -7  -5   7    3.38    0.25
  -7  -5   7    3.03    0.28
   7  -5  -7    2.92    0.21
   7  -5  -7    3.72    0.28
   7   5  -7    4.07    0.29
  -7   5   7    3.86    0.23
  -7   5   7    3.68    0.28
  -7   5   7    3.36    0.27
  -6  -5   7    1.03    0.15
   6  -5  -7    0.81    0.18
  -6  -5   7    1.02    0.18
   6  -5  -7    0.97    0.15
  -6   5   7    0.88    0.16
   6   5  -7    0.93    0.17
  -6   5   7    0.84    0.13
  -6   5   7    0.90    0.18
  -5  -5   7    1.56    0.20
   5  -5  -7    1.12    0.18
  -5  -5   7    1.73    0.17
   5  -5  -7    1.49    0.18
  -5   5   7    1.59    0.19
  -5   5   7    1.49    0.20
   5   5  -7    1.41    0.11
  -5   5   7    1.35    0.14
   5   5  -7    1.64    0.20
  -4  -5   7    6.09    0.23
   4  -5  -7    6.56    0.30
  -4  -5   7    6.59    0.32
  -4  -5   7    6.57    0.26
   4  -5  -7    5.92    0.22
  -4   5   7    5.78    0.31
   4   5  -7    6.10    0.23
  -4   5   7    6.05    0.29
  -4   5   7    6.03    0.22
   4   5  -7    6.52    0.32
  -3  -5   7    2.70    0.21
  -3  -5   7    3.16    0.16
  -3  -5   7    2.74    0.16
   3  -5  -7    2.83    0.20
   3  -5  -7    2.89    0.13
   3   5  -7    3.08    0.17
  -3   5   7    2.89    0.20
   3   5  -7    2.79    0.16
  -3   5   7    2.53    0.21
   3   5  -7    2.58    0.20
  -2  -5   7    1.10    0.13
  -2  -5   7    1.04    0.15
   2  -5  -7    1.05    0.08
   2  -5  -7    1.35    0.16
   2   5  -7    1.14    0.10
   2   5  -7    0.90    0.12
  -2   5   7    1.16    0.14
   2   5  -7    1.15    0.15
  -2   5   7    1.23    0.16
  -1  -5   7    0.23    0.09
  -1  -5   7    0.56    0.11
   1  -5  -7    0.51    0.12
   1  -5  -7    0.55    0.06
  -1   5   7    0.42    0.11
   1   5  -7    0.52    0.11
  -1   5   7    0.47    0.10
   1   5  -7    0.52    0.07
   1   5  -7    0.37    0.11
   0  -5  -7   25.35    0.57
   0  -5   7   26.13    0.69
   0  -5  -7   25.13    0.71
   0  -5   7   24.84    0.68
   0   5  -7   26.28    0.71
   0   5  -7   25.05    0.57
   0   5   7   25.15    0.66
   0   5   7   24.27    0.70
   0   5  -7   25.58    0.68
   1  -5   7    8.65    0.35
  -1  -5  -7    8.97    0.26
  -1  -5  -7    8.97    0.36
   1  -5   7    9.15    0.34
  -1   5  -7    9.41    0.26
   1   5   7    9.17    0.32
  -1   5  -7    8.92    0.36
   1   5   7    9.55    0.36
  -2  -5  -7   46.95    1.02
   2  -5   7   45.96    1.14
  -2  -5  -7   45.78    1.13
   2  -5   7   44.81    1.07
   2   5   7   45.02    1.11
   2   5   7   45.35    1.07
  -2   5  -7   46.32    1.14
  -2   5  -7   46.05    1.00
  -3  -5  -7    4.26    0.20
   3  -5   7    4.55    0.21
  -3  -5  -7    3.97    0.24
   3  -5   7    4.16    0.27
   3   5   7    3.88    0.22
  -3   5  -7    3.75    0.18
   3   5   7    3.91    0.23
  -3   5  -7    4.08    0.25
   4  -5   7    0.34    0.09
   4  -5   7    0.49    0.14
  -4  -5  -7    0.44    0.11
  -4  -5  -7    0.20    0.12
  -4   5  -7    0.34    0.12
   4   5   7    0.28    0.11
   4   5   7    0.20    0.10
  -4   5  -7    0.30    0.09
   5  -5   7    1.49    0.14
   5  -5   7    1.63    0.22
  -5  -5  -7    1.85    0.22
  -5  -5  -7    1.67    0.18
  -5   5  -7    1.50    0.21
   5   5   7    1.46    0.19
  -5   5  -7    1.56    0.16
   5   5   7    1.64    0.19
   6  -5   7   29.10    0.91
  -6  -5  -7   29.64    0.85
  -6  -5  -7   29.71    0.84
   6   5   7   30.09    0.83
  -6   5  -7   31.85    0.92
   6   5   7   30.15    0.85
  -6   5  -7   31.24    0.81
  -7  -5  -7   10.84    0.45
   7  -5   7   11.22    0.52
  -7  -5  -7   10.88    0.44
  -7   5  -7   10.07    0.48
  -7   5  -7   10.87    0.43
   7   5   7   10.44    0.43
   7   5   7   11.24    0.46
  -8  -5  -7    3.68    0.27
  -8  -5  -7    3.61    0.33
   8  -5   7    3.53    0.36
   8   5   7    3.42    0.27
   8   5   7    3.21    0.26
  -8   5  -7    3.74    0.28
  -8   5  -7    3.84    0.36
   9  -5   7    1.52    0.27
  -9  -5  -7    2.22    0.28
  -9   5  -7    2.08    0.25
   9   5   7    1.83    0.27
  -9   5  -7    1.64    0.27
  10  -5   7    3.00    0.36
 -10  -5  -7    2.12    0.29
 -10   5  -7    2.36    0.29
  10   5   7    2.31    0.30
 -10   5  -7    2.10    0.31
  11  -5   7    0.59    0.24
 -11  -5  -7    0.63    0.21
  11  -5   7    0.73    0.23
 -11   5  -7    0.54    0.22
  11   5   7    0.93    0.23
 -11   5  -7    0.75    0.23
 -11  -6   7    0.00    0.16
  11  -6  -7   -0.07    0.15
  11  -6  -7    0.01    0.18
 -11   6   7   -0.11    0.16
  11   6  -7    0.01    0.16
  10  -6  -7    0.36    0.21
 -10  -6   7    0.35    0.18
 -10  -6   7    0.47    0.18
  10   6  -7    0.22    0.18
 -10   6   7    0.27    0.18
  -9  -6   7    0.19    0.14
   9  -6  -7    0.28    0.16
  -9  -6   7    0.40    0.16
   9   6  -7    0.06    0.15
  -9   6   7    0.13    0.17
   8  -6  -7    6.61    0.41
  -8  -6   7    7.04    0.39
  -8  -6   7    6.42    0.34
   8   6  -7    7.35    0.42
  -8   6   7    6.43    0.40
  -7  -6   7    2.59    0.25
   7  -6  -7    2.00    0.22
   7  -6  -7    2.36    0.28
  -7  -6   7    1.83    0.26
  -7   6   7    2.40    0.27
  -7   6   7    2.44    0.28
   7   6  -7    1.91    0.26
  -6  -6   7   28.04    0.77
   6  -6  -7   27.99    0.79
   6  -6  -7   28.91    0.89
  -6  -6   7   29.61    0.87
  -6   6   7   28.43    0.85
  -6   6   7   27.72    0.87
   6   6  -7   26.70    0.85
  -5  -6   7   32.36    0.92
   5  -6  -7   31.22    0.87
  -5  -6   7   32.94    0.82
   5  -6  -7   32.00    0.94
  -5   6   7   32.21    0.90
  -5   6   7   32.53    0.94
   5   6  -7   32.19    0.93
  -4  -6   7    4.46    0.22
   4  -6  -7    4.49    0.27
  -4  -6   7    4.87    0.29
  -4  -6   7    4.33    0.21
  -4   6   7    4.54    0.27
  -4   6   7    4.29    0.31
   4   6  -7    4.28    0.22
   4   6  -7    4.29    0.21
   4   6  -7    3.96    0.28
  -3  -6   7   13.27    0.38
  -3  -6   7   12.96    0.43
  -3  -6   7   12.98    0.49
   3  -6  -7   13.52    0.49
  -3   6   7   14.04    0.51
   3   6  -7   12.84    0.38
  -3   6   7   14.19    0.48
   3   6  -7   13.41    0.50
   3   6  -7   13.11    0.42
   2  -6  -7   21.14    0.66
  -2  -6   7   20.83    0.66
  -2  -6   7   22.26    0.61
   2   6  -7   22.03    0.53
   2   6  -7   21.12    0.66
   2   6  -7   22.25    0.61
  -2   6   7   20.18    0.66
  -2   6   7   21.75    0.63
   1  -6  -7    5.67    0.31
  -1  -6   7    5.92    0.28
  -1  -6   7    5.43    0.29
   1   6  -7    4.97    0.29
  -1   6   7    5.30    0.27
   1   6  -7    6.00    0.29
  -1   6   7    6.16    0.31
   0  -6  -7    3.24    0.24
   0  -6   7    3.18    0.22
   0  -6   7    2.99    0.22
   0   6  -7    3.57    0.24
   0   6   7    3.24    0.23
   0   6   7    3.02    0.21
   0   6  -7    2.95    0.21
  -1  -6  -7   57.15    1.42
   1  -6   7   59.50    1.42
   1  -6   7   59.56    1.39
  -1  -6  -7   58.10    1.23
   1   6   7   58.86    1.41
   1   6   7   59.86    1.37
  -1   6  -7   60.31    1.44
  -2  -6  -7    4.31    0.27
   2  -6   7    4.69    0.25
  -2  -6  -7    4.62    0.19
   2  -6   7    4.60    0.28
  -2   6  -7    3.93    0.27
   2   6   7    4.46    0.26
   2   6   7    4.36    0.24
  -3  -6  -7   24.43    0.62
  -3  -6  -7   24.29    0.74
   3  -6   7   24.49    0.68
   3  -6   7   24.28    0.76
   3   6   7   25.39    0.73
   3   6   7   24.08    0.69
  -4  -6  -7    0.03    0.11
   4  -6   7    0.03    0.12
   4  -6   7   -0.02    0.08
  -4  -6  -7   -0.01    0.08
  -4   6  -7    0.07    0.11
   4   6   7    0.07    0.11
   4   6   7    0.17    0.12
   5  -6   7    1.04    0.21
  -5  -6  -7    1.25    0.20
  -5  -6  -7    1.22    0.16
   5   6   7    1.46    0.19
   5   6   7    1.45    0.19
  -5   6  -7    1.39    0.21
  -6  -6  -7    0.01    0.10
   6  -6   7    0.13    0.15
  -6  -6  -7    0.18    0.13
   6   6   7    0.12    0.13
  -6   6  -7    0.16    0.14
   6   6   7    0.22    0.12
  -7  -6  -7    0.36    0.14
   7  -6   7    0.12    0.16
  -7  -6  -7    0.14    0.14
   7   6   7    0.26    0.13
   7   6   7    0.14    0.13
  -7   6  -7    0.29    0.15
  -8  -6  -7    3.73    0.30
   8  -6   7    3.61    0.38
  -8  -6  -7    4.14    0.31
  -8   6  -7    3.26    0.35
   8   6   7    3.94    0.30
   8   6   7    3.60    0.34
  -9  -6  -7    1.70    0.25
   9  -6   7    1.27    0.27
   9   6   7    1.75    0.26
  -9   6  -7    1.26    0.26
  10  -6   7    0.05    0.18
 -10  -6  -7    0.07    0.16
  10   6   7    0.00    0.17
 -10   6  -7    0.05    0.17
  10  -7  -7    0.16    0.19
 -10  -7   7    0.15    0.18
 -10   7   7    0.23    0.19
  10   7  -7    0.21    0.19
  -9  -7   7    0.26    0.19
   9  -7  -7    0.34    0.19
   9   7  -7    0.29    0.17
  -9   7   7    0.11    0.16
  -8  -7   7    1.06    0.23
   8  -7  -7    1.27    0.25
  -8   7   7    1.41    0.25
   8   7  -7    0.84    0.21
   7  -7  -7    4.12    0.30
   7  -7  -7    4.21    0.35
  -7  -7   7    3.35    0.34
  -7   7   7    3.98    0.33
  -7   7   7    4.09    0.35
   7   7  -7    4.36    0.34
   6  -7  -7   -0.15    0.14
  -6  -7   7    0.05    0.13
   6  -7  -7    0.01    0.11
  -6   7   7   -0.04    0.16
   6   7  -7   -0.07    0.13
  -6   7   7   -0.02    0.12
   5  -7  -7    1.29    0.22
   5  -7  -7    1.38    0.21
  -5  -7   7    1.13    0.21
   5   7  -7    1.06    0.20
  -5   7   7    1.37    0.21
  -5   7   7    1.11    0.21
  -4  -7   7    3.92    0.30
   4  -7  -7    4.56    0.30
   4  -7  -7    3.97    0.31
   4   7  -7    4.52    0.31
  -4   7   7    3.88    0.28
   4   7  -7    4.41    0.24
  -4   7   7    3.53    0.29
   3  -7  -7    0.65    0.15
  -3  -7   7    1.23    0.17
  -3  -7   7    0.53    0.16
   3   7  -7    0.41    0.12
  -3   7   7    0.95    0.18
   3   7  -7    0.74    0.17
  -3   7   7    0.64    0.16
  -2  -7   7   17.01    0.60
  -2  -7   7   17.50    0.56
   2  -7  -7   16.63    0.59
   2   7  -7   17.55    0.61
  -2   7   7   16.58    0.61
  -2   7   7   15.81    0.56
   2   7  -7   17.92    0.56
   1  -7  -7    1.19    0.20
  -1  -7   7    0.56    0.15
  -1  -7   7    0.97    0.17
  -1   7   7    0.94    0.18
  -1   7   7    1.36    0.19
   1   7  -7    0.71    0.15
   1   7  -7    0.78    0.17
   0  -7   7    0.75    0.16
   0  -7   7    0.79    0.16
   0  -7  -7    0.74    0.16
   0   7   7    0.62    0.14
   0   7   7    0.55    0.15
   0   7  -7    0.62    0.15
   0   7  -7    0.93    0.18
  -1  -7  -7   -0.02    0.11
   1  -7   7   -0.07    0.11
   1  -7   7    0.03    0.11
  -1   7  -7   -0.06    0.11
   1   7   7    0.00    0.10
   1   7   7   -0.02    0.10
   2  -7   7   -0.04    0.11
   2  -7   7    0.00    0.11
  -2  -7  -7   -0.09    0.10
   2   7   7   -0.03    0.10
  -2   7  -7    0.08    0.12
   2   7   7   -0.09    0.09
  -3  -7  -7    1.24    0.21
   3  -7   7    1.29    0.18
   3  -7   7    1.32    0.22
   3   7   7    1.39    0.20
  -3   7  -7    1.79    0.24
   3   7   7    1.94    0.22
   4  -7   7    1.95    0.21
  -4  -7  -7    1.90    0.24
   4  -7   7    1.68    0.25
  -4   7  -7    1.75    0.24
   4   7   7    1.85    0.22
   4   7   7    2.15    0.23
  -5  -7  -7    3.86    0.31
   5  -7   7    3.37    0.34
  -5   7  -7    3.85    0.31
   5   7   7    4.42    0.30
   5   7   7    4.19    0.29
  -6  -7  -7    0.18    0.15
   6  -7   7    0.10    0.16
   6   7   7    0.07    0.12
  -6   7  -7    0.21    0.16
   6   7   7    0.32    0.14
  -7  -7  -7    1.11    0.22
   7  -7   7    0.91    0.23
   7   7   7    1.37    0.21
  -7   7  -7    1.28    0.25
   7   7   7    1.39    0.24
  -8  -7  -7    1.96    0.27
   8  -7   7    1.58    0.29
   8   7   7    2.12    0.29
  -8   7  -7    1.44    0.26
   9  -7   7   -0.14    0.19
  -9   7  -7    0.21    0.18
   9   7   7    0.13    0.18
  10  -7   7   -0.05    0.18
 -10   7  -7    0.16    0.19
  10   7   7    0.04    0.16
   9  -8  -7    0.78    0.25
  -9  -8   7    0.48    0.23
   9   8  -7    0.63    0.23
  -9   8   7    0.68    0.25
  -8  -8   7    3.68    0.38
   8  -8  -7    3.48    0.39
   8   8  -7    3.74    0.39
  -8   8   7    3.62    0.39
   7  -8  -7    0.12    0.17
  -7  -8   7    0.03    0.15
  -7   8   7    0.26    0.19
   7   8  -7    0.24    0.19
  -7   8   7    0.20    0.16
   6  -8  -7    5.28    0.33
  -6  -8   7    6.37    0.41
   6  -8  -7    6.19    0.42
  -6   8   7    5.54    0.38
  -6   8   7    6.62    0.45
   6   8  -7    6.87    0.42
   5  -8  -7    0.54    0.20
  -5  -8   7    0.31    0.17
   5  -8  -7    0.60    0.18
  -5   8   7    0.65    0.19
   5   8  -7    0.74    0.20
  -5   8   7    0.51    0.20
   4  -8  -7    0.19    0.13
  -4  -8   7    0.40    0.17
   4  -8  -7    0.28    0.16
  -4   8   7    0.26    0.16
  -4   8   7    0.23    0.14
   4   8  -7    0.25    0.15
  -3  -8   7   -0.05    0.10
  -3  -8   7    0.02    0.12
   3  -8  -7    0.08    0.13
   3   8  -7   -0.07    0.11
  -3   8   7   -0.04    0.12
   3   8  -7   -0.04    0.14
  -3   8   7    0.03    0.14
   2  -8  -7    1.21    0.22
  -2  -8   7    1.34    0.22
  -2  -8   7    1.10    0.19
   2   8  -7    1.46    0.23
   2   8  -7    1.22    0.19
  -2   8   7    0.70    0.18
  -2   8   7    1.33    0.23
  -1  -8   7    0.58    0.17
   1  -8  -7    0.41    0.18
  -1  -8   7    0.39    0.16
   1   8  -7    0.60    0.17
  -1   8   7    0.53    0.19
  -1   8   7    0.53    0.16
   1   8  -7    0.76    0.18
   0  -8   7   13.93    0.55
   0  -8   7   14.46    0.56
   0  -8  -7   13.23    0.55
   0   8   7   13.24    0.55
   0   8   7   14.31    0.53
   0   8  -7   13.61    0.56
   0   8  -7   13.88    0.55
  -1  -8  -7    4.08    0.31
   1  -8   7    4.89    0.31
   1  -8   7    4.24    0.31
   1   8   7    4.44    0.31
   1   8   7    4.50    0.30
  -1   8  -7    4.76    0.34
   2  -8   7    2.49    0.28
  -2  -8  -7    2.37    0.28
   2  -8   7    2.03    0.24
   2   8   7    2.21    0.26
   2   8   7    2.36    0.26
  -2   8  -7    2.31    0.28
   3  -8   7    0.15    0.11
   3  -8   7    0.35    0.16
  -3  -8  -7    0.34    0.17
   3   8   7    0.36    0.15
  -3   8  -7    0.32    0.17
   3   8   7    0.24    0.13
  -4  -8  -7    0.04    0.14
   4  -8   7    0.07    0.12
   4  -8   7   -0.13    0.13
   4   8   7    0.32    0.16
   4   8   7   -0.03    0.11
  -4   8  -7   -0.13    0.11
   5  -8   7    2.88    0.34
  -5  -8  -7    3.37    0.36
   5   8   7    3.20    0.31
   5   8   7    3.42    0.32
  -5   8  -7    3.27    0.35
  -6  -8  -7    3.23    0.34
   6  -8   7    2.87    0.35
   6   8   7    2.86    0.29
   6   8   7    2.76    0.30
  -6   8  -7    2.65    0.33
  -7  -8  -7    0.03    0.14
   7  -8   7    0.15    0.19
  -7   8  -7    0.10    0.17
   7   8   7    0.10    0.14
  -8  -8  -7    6.14    0.43
   8  -8   7    4.49    0.47
   8   8   7    5.82    0.41
  -8   8  -7    5.37    0.43
   9  -8   7    1.01    0.28
  -9  -8  -7    1.01    0.24
   9   8   7    1.56    0.28
  -9   8  -7    1.14    0.27
  -8  -9   7    3.05    0.38
   8  -9  -7    3.38    0.43
   8   9  -7    3.13    0.38
  -8   9   7    3.19    0.38
  -7  -9   7    0.51    0.21
   7  -9  -7    0.50    0.22
  -7   9   7    0.47    0.22
   7   9  -7    0.64    0.22
  -7   9   7    0.75    0.22
  -6  -9   7    1.75    0.29
   6  -9  -7    1.20    0.23
   6  -9  -7    1.17    0.26
  -6   9   7    0.96    0.26
   6   9  -7    1.29    0.27
  -6   9   7    1.64    0.28
   5  -9  -7    0.22    0.18
   5  -9  -7    0.17    0.17
  -5  -9   7    0.06    0.16
  -5   9   7   -0.06    0.16
  -5   9   7    0.16    0.20
   5   9  -7    0.35    0.18
  -4  -9   7    0.90    0.22
   4  -9  -7    1.25    0.23
   4  -9  -7    0.88    0.23
   4   9  -7    1.25    0.25
  -4   9   7    1.32    0.23
  -4   9   7    1.01    0.24
   3  -9  -7    0.04    0.16
  -3  -9   7   -0.06    0.14
   3  -9  -7    0.05    0.18
  -3   9   7    0.01    0.13
  -3   9   7    0.06    0.18
   3   9  -7    0.06    0.15
  -2  -9   7    0.09    0.14
  -2  -9   7    0.01    0.14
   2  -9  -7    0.03    0.14
  -2   9   7   -0.11    0.13
   2   9  -7   -0.04    0.13
  -2   9   7   -0.25    0.11
   2   9  -7   -0.02    0.14
  -1  -9   7    1.74    0.25
   1  -9  -7    1.95    0.27
  -1  -9   7    1.51    0.25
   1   9  -7    1.41    0.24
  -1   9   7    1.85    0.26
  -1   9   7    2.23    0.30
   1   9  -7    1.74    0.26
   0  -9   7    1.41    0.24
   0  -9  -7    1.67    0.26
   0  -9   7    1.83    0.27
   0   9  -7    1.65    0.25
   0   9  -7    1.79    0.27
   0   9   7    1.91    0.25
   0   9   7    1.85    0.26
  -1  -9  -7    1.82    0.28
   1  -9   7    1.71    0.25
   1  -9   7    1.95    0.28
   1   9   7    2.09    0.28
  -1   9  -7    2.19    0.29
   1   9   7    2.52    0.29
  -2  -9  -7    0.50    0.18
   2  -9   7    0.93    0.20
   2  -9   7    0.47    0.20
   2   9   7    0.52    0.16
   2   9   7    0.68    0.19
  -2   9  -7    0.55    0.20
   3  -9   7    1.62    0.24
  -3  -9  -7    1.06    0.23
   3  -9   7    1.44    0.25
   3   9   7    1.08    0.21
  -3   9  -7    1.68    0.27
   3   9   7    1.59    0.25
  -4  -9  -7    3.91    0.39
   4  -9   7    4.39    0.38
   4   9   7    4.79    0.36
  -4   9  -7    4.86    0.39
   4   9   7    4.88    0.34
  -5  -9  -7    0.43    0.20
   5  -9   7    0.73    0.25
  -5   9  -7    0.76    0.23
   5   9   7    0.75    0.20
   5   9   7    0.42    0.19
  -6  -9  -7    0.65    0.24
   6  -9   7    0.53    0.23
  -6   9  -7    0.40    0.23
   6   9   7    0.66    0.20
   7  -9   7   -0.13    0.19
  -7  -9  -7   -0.12    0.15
   7   9   7    0.11    0.17
  -7   9  -7   -0.13    0.17
   6 -10  -7    0.79    0.25
  -6 -10   7    0.51    0.22
   6  10  -7    0.89    0.27
  -6  10   7    0.73    0.26
  -6  10   7    0.88    0.24
  -5 -10   7   -0.06    0.17
   5 -10  -7    0.17    0.21
   5 -10  -7    0.02    0.17
  -5  10   7    0.05    0.18
  -5  10   7    0.08    0.17
   5  10  -7    0.00    0.17
   4 -10  -7    0.26    0.20
  -4 -10   7    0.52    0.21
   4 -10  -7    0.39    0.23
   4  10  -7    0.27    0.20
  -4  10   7    0.41    0.19
  -4  10   7    0.23    0.22
   3 -10  -7   -0.05    0.15
  -3 -10   7    0.17    0.17
   3 -10  -7    0.11    0.18
  -3  10   7    0.08    0.18
  -3  10   7    0.00    0.14
   3  10  -7   -0.19    0.17
  -2 -10   7    1.74    0.29
   2 -10  -7    1.75    0.31
   2 -10  -7    1.45    0.28
  -2  10   7    1.22    0.24
   2  10  -7    1.96    0.30
  -2  10   7    1.78    0.30
   1 -10  -7    5.63    0.42
  -1 -10   7    4.95    0.38
  -1 -10   7    5.27    0.38
  -1  10   7    4.76    0.41
   1  10  -7    5.34    0.39
  -1  10   7    5.20    0.38
   1  10  -7    4.37    0.37
   0 -10   7    0.08    0.18
   0 -10   7   -0.11    0.17
   0 -10  -7    0.03    0.16
   0  10  -7    0.21    0.17
   0  10   7   -0.17    0.14
   0  10   7    0.23    0.19
   1 -10   7    2.30    0.32
   1 -10   7    1.61    0.26
  -1 -10  -7    1.91    0.30
   1  10   7    1.83    0.27
  -1  10  -7    1.94    0.31
   1  10   7    1.69    0.28
   2 -10   7    1.15    0.23
  -2 -10  -7    0.67    0.22
   2 -10   7    0.89    0.23
   2  10   7    1.16    0.25
  -2  10  -7    0.69    0.22
   2  10   7    0.65    0.20
  -3 -10  -7    4.01    0.43
   3 -10   7    3.56    0.35
   3 -10   7    3.93    0.42
   3  10   7    4.37    0.35
   3  10   7    4.33    0.36
  -3  10  -7    3.48    0.39
  -4 -10  -7    0.53    0.21
   4 -10   7    0.44    0.24
   4  10   7    1.19    0.25
  -4  10  -7    0.25    0.20
   4  10   7    0.33    0.19
  -5 -10  -7    2.64    0.36
   5 -10   7    2.31    0.37
  -5  10  -7    2.62    0.37
   5  10   7    2.28    0.31
   2 -11  -7   -0.07    0.19
  -2 -11   7    0.10    0.19
   2 -11  -7    0.07    0.21
  -2  11   7   -0.07    0.18
   2  11  -7    0.06    0.18
  -2  11   7    0.12    0.19
   1 -11  -7    0.14    0.19
  -1 -11   7    0.11    0.18
   1 -11  -7    0.16    0.20
  -1  11   7    0.24    0.17
   1  11  -7    0.01    0.18
  -1  11   7   -0.14    0.16
   0 -11   7   -0.02    0.17
   0 -11  -7    0.03    0.18
   0 -11   7    0.37    0.21
   0  11   7    0.55    0.22
   0  11   7    0.16    0.17
   0  11  -7    0.35    0.22
   1 -11   7   -0.02    0.19
   1 -11   7   -0.01    0.17
  -1 -11  -7    0.23    0.19
   1  11   7    0.05    0.17
  -1  11  -7    0.04    0.18
   1  11   7    0.20    0.20
   2 -11   7   -0.16    0.17
   2 -11   7    0.36    0.19
  -2 -11  -7    0.47    0.24
   2  11   7   -0.06    0.17
  -2  11  -7    0.00    0.19
   2  11   7    0.08    0.17
  13   0  -8    1.20    0.27
 -13   0   8    1.02    0.25
 -12   0   8    1.31    0.25
  12   0  -8    1.03    0.25
 -11   0   8    0.11    0.15
  11   0  -8    0.26    0.16
  10   0  -8    0.16    0.14
 -10   0   8    0.01    0.13
  -9   0   8    0.08    0.08
   9   0  -8    0.10    0.11
   9   0  -8    0.19    0.15
  -9   0   8    0.09    0.13
  -8   0   8   53.82    1.22
   8   0  -8   55.17    1.20
   8   0  -8   52.75    1.32
  -8   0   8   52.24    1.31
  -7   0   8   27.89    0.69
   7   0  -8   27.49    0.76
   7   0  -8   27.49    0.66
  -7   0   8   26.86    0.76
   6   0  -8    7.10    0.23
   6   0  -8    7.19    0.30
  -6   0   8    7.05    0.26
  -6   0   8    7.22    0.30
   5   0  -8   40.25    0.96
  -5   0   8   40.54    0.93
  -5   0   8   42.32    0.98
   5   0  -8   40.44    0.88
  -4   0   8   13.46    0.32
   4   0  -8   12.97    0.38
  -4   0   8   12.93    0.39
   4   0  -8   12.79    0.32
  -4   0   8   13.17    0.37
  -3   0   8    9.99    0.30
  -3   0   8   10.13    0.31
  -3   0   8   10.04    0.25
   3   0  -8    9.97    0.29
  -2   0   8  134.75    2.73
   2   0  -8  134.23    2.73
  -2   0   8  135.89    2.68
  -2   0   8  134.83    2.73
   2   0  -8  132.87    2.69
   1   0  -8   20.03    0.43
  -1   0   8   19.55    0.45
  -1   0   8   19.41    0.47
   1   0  -8   19.45    0.48
   0   0   8   18.18    0.38
   0   0  -8   18.14    0.45
   0   0  -8   17.97    0.38
   0   0   8   18.05    0.44
   0   0   8   18.41    0.43
  -1   0  -8   17.14    0.37
   1   0   8   16.33    0.39
   1   0   8   16.96    0.43
  -1   0  -8   15.91    0.42
   2   0   8   56.45    1.17
  -2   0  -8   57.46    1.19
   2   0   8   55.69    1.23
  -2   0  -8   56.26    1.24
   3   0   8    1.07    0.12
   3   0   8    1.50    0.08
  -3   0  -8    1.04    0.12
  -3   0  -8    1.38    0.10
  -3   0  -8    1.75    0.08
   4   0   8   15.18    0.43
  -4   0  -8   14.88    0.34
   4   0   8   14.87    0.45
  -4   0  -8   15.61    0.46
  -4   0  -8   14.01    0.42
  -5   0  -8    8.62    0.32
   5   0   8    8.86    0.32
  -5   0  -8    9.26    0.22
   5   0   8    9.63    0.35
  -5   0  -8    8.80    0.35
   6   0   8   61.31    1.44
  -6   0  -8   60.83    1.46
   6   0   8   62.35    1.46
  -6   0  -8   65.32    1.45
   7   0   8    2.22    0.22
  -7   0  -8    2.34    0.23
   7   0   8    2.20    0.22
  -7   0  -8    2.03    0.22
  -8   0  -8   30.32    0.88
   8   0   8   29.41    0.85
  -8   0  -8   29.01    0.85
   8   0   8   28.75    0.84
   9   0   8   14.44    0.56
  -9   0  -8   15.69    0.60
   9   0   8   15.58    0.58
  10   0   8    1.55    0.23
 -10   0  -8    1.37    0.24
  10   0   8    1.21    0.22
 -11   0  -8   -0.11    0.14
  11   0   8   -0.03    0.14
  11   0   8    0.09    0.15
  12   0   8    7.66    0.46
  12   0   8    6.83    0.45
 -12   0  -8    7.34    0.48
 -13  -1   8   -0.15    0.15
  13  -1  -8   -0.01    0.19
  13   1  -8    0.05    0.19
 -13   1   8    0.00    0.19
  12  -1  -8    0.15    0.17
 -12  -1   8    0.32    0.18
  12   1  -8    0.15    0.17
 -12   1   8    0.23    0.17
 -11  -1   8    8.54    0.45
  11  -1  -8    7.63    0.44
  11   1  -8    7.17    0.43
 -11   1   8    7.17    0.43
 -10  -1   8    0.12    0.14
  10  -1  -8    0.23    0.14
 -10   1   8    0.22    0.14
  10   1  -8    0.12    0.14
   9  -1  -8   31.54    0.81
   9  -1  -8   29.77    0.90
  -9  -1   8   31.81    0.91
  -9  -1   8   32.27    0.81
   9   1  -8   30.82    0.91
  -9   1   8   29.86    0.89
  -8  -1   8    4.17    0.23
   8  -1  -8    3.95    0.22
   8  -1  -8    3.80    0.26
  -8  -1   8    3.96    0.26
   8   1  -8    4.29    0.27
   8   1  -8    3.84    0.18
  -8   1   8    4.19    0.21
  -8   1   8    3.83    0.26
  -8   1   8    4.37    0.28
   7  -1  -8   -0.02    0.07
  -7  -1   8   -0.08    0.08
   7  -1  -8    0.02    0.08
  -7  -1   8    0.04    0.06
   7   1  -8    0.09    0.09
   7   1  -8    0.05    0.05
  -7   1   8   -0.06    0.08
  -7   1   8   -0.02    0.09
  -7   1   8    0.02    0.06
   6  -1  -8    4.59    0.24
  -6  -1   8    4.54    0.22
   6  -1  -8    5.04    0.21
  -6  -1   8    5.04    0.25
   6   1  -8    5.24    0.16
  -6   1   8    4.65    0.24
  -6   1   8    4.97    0.21
  -6   1   8    5.12    0.25
   6   1  -8    4.62    0.24
  -5  -1   8   54.83    1.24
   5  -1  -8   53.47    1.24
   5  -1  -8   54.15    1.18
  -5  -1   8   56.05    1.22
  -5   1   8   54.88    1.24
  -5   1   8   54.63    1.24
   5   1  -8   54.64    1.24
   5   1  -8   54.99    1.10
  -5   1   8   54.07    1.20
  -5   1   8   53.86    1.19
  -4  -1   8    8.74    0.30
  -4  -1   8    8.66    0.29
   4  -1  -8    8.16    0.28
   4   1  -8    8.60    0.29
  -4   1   8    8.09    0.29
  -4   1   8    8.81    0.27
  -4   1   8    8.37    0.28
  -4   1   8    8.93    0.28
   3  -1  -8   19.60    0.49
  -3  -1   8   20.59    0.52
  -3  -1   8   20.10    0.51
   3   1  -8   20.21    0.51
  -3   1   8   20.68    0.50
  -3   1   8   19.68    0.49
  -3   1   8   19.93    0.51
  -3   1   8   20.00    0.48
  -2  -1   8   43.65    0.98
   2  -1  -8   43.82    0.94
  -2  -1   8   44.43    0.91
   2  -1  -8   45.47    0.97
  -2  -1   8   45.14    0.98
  -2   1   8   44.50    0.94
  -2   1   8   44.06    0.96
  -2   1   8   45.24    0.98
   2   1  -8   44.42    0.96
  -2   1   8   44.60    0.97
   2   1  -8   45.14    0.98
  -1  -1   8   20.42    0.50
   1  -1  -8   21.73    0.45
   1  -1  -8   20.12    0.49
  -1  -1   8   21.02    0.46
   1  -1  -8   20.68    0.44
   1   1  -8   20.47    0.49
  -1   1   8   20.42    0.50
   1   1  -8   20.10    0.47
  -1   1   8   20.39    0.49
  -1   1   8   21.18    0.44
   0  -1  -8  183.59    3.65
   0  -1   8  180.00    3.64
   0  -1   8  182.94    3.63
   0   1  -8  180.74    3.62
   0   1  -8  178.89    3.65
   0   1   8  183.97    3.65
   0   1   8  183.06    3.65
   1  -1   8   27.18    0.61
  -1  -1  -8   27.51    0.63
  -1  -1  -8   27.88    0.65
   1  -1   8   26.13    0.65
   1   1   8   29.12    0.66
  -1   1  -8   27.62    0.62
   1   1   8   28.04    0.58
  -1   1  -8   27.50    0.64
   1   1   8   27.26    0.63
  -2  -1  -8  160.77    3.24
  -2  -1  -8  161.89    3.29
   2  -1   8  161.01    3.21
   2  -1   8  165.25    3.30
   2   1   8  161.07    3.24
  -2   1  -8  159.26    3.25
   2   1   8  162.71    3.22
   2   1   8  159.95    3.29
  -2   1  -8  161.63    3.28
   3  -1   8   17.84    0.39
  -3  -1  -8   18.14    0.50
   3  -1   8   17.66    0.50
  -3  -1  -8   18.30    0.44
  -3   1  -8   17.78    0.47
   3   1   8   18.30    0.50
   3   1   8   17.19    0.45
  -3   1  -8   18.46    0.50
  -4  -1  -8   38.04    0.83
  -4  -1  -8   37.84    0.92
   4  -1   8   39.74    0.94
  -4   1  -8   37.20    0.90
   4   1   8   37.43    0.91
  -4   1  -8   37.00    0.91
   4   1   8   37.81    0.88
   5  -1   8    2.53    0.19
  -5  -1  -8    2.64    0.13
  -5  -1  -8    2.43    0.18
   5   1   8    2.49    0.17
  -5   1  -8    2.55    0.19
  -5   1  -8    2.40    0.17
   5   1   8    2.64    0.18
  -6  -1  -8   21.31    0.50
  -6  -1  -8   19.17    0.62
   6  -1   8   21.31    0.64
   6  -1   8   19.96    0.61
   6   1   8   20.64    0.61
   6   1   8   22.17    0.61
  -6   1  -8   20.81    0.63
  -6   1  -8   21.26    0.62
   7  -1   8    7.26    0.34
  -7  -1  -8    7.66    0.36
   7  -1   8    7.27    0.35
  -7   1  -8    7.72    0.36
   7   1   8    6.78    0.32
  -7   1  -8    6.91    0.34
   7   1   8    6.94    0.33
   8  -1   8    3.79    0.28
   8  -1   8    3.42    0.26
  -8  -1  -8    3.60    0.32
   8   1   8    3.79    0.27
  -8   1  -8    3.53    0.27
   8   1   8    3.49    0.25
  -8   1  -8    4.09    0.28
   9  -1   8    3.69    0.29
  -9  -1  -8    3.50    0.29
   9  -1   8    3.21    0.27
  -9   1  -8    3.27    0.28
  -9   1  -8    3.54    0.29
   9   1   8    3.65    0.27
   9   1   8    3.86    0.30
 -10  -1  -8    0.39    0.17
  10  -1   8    0.51    0.18
  10  -1   8    0.54    0.17
 -10   1  -8    0.34    0.16
  10   1   8    0.59    0.15
[truncated: 860,172 more chars]
